# Supplementary material
Source: HighWire-hosted journal article supplement (https://gut.bmj.com/content/gutjnl-2017-314454)
Supplement: inline-supplementary-material-2 [file inline-supplementary-material-2.xlsx]

## Sheet: topliste
SNP characteristics					QC information			Priority Pruning			nearest genes (functional relevance)	deleteriousnes				GWAS catalogue	eQTLs		top phenotype	ACP vs. all controls			ACP vs. Non-alcoholic controls			ACP vs. alcoholic controls
SNP	chr	position of SNP	counted allele	other allele	minor allel freq.	imputation type	info-score	tagSNP	r2 SNP-tagSNP	is tagSNP		Eigen	EigenPC	CADD	DANN		cis-eQTL genes	trans-eQTL genes		OR	95%CI	-LOG10(P)	OR	95%CI	-LOG10(P)	OR	95%CI	-LOG10(P)
rs2855983	7	142467855	G	A	0.392	3	1	rs2855983	1	TRUE	PRSS3P1 (0.41 kb, near_gene/Upstream gene/MODIFIER); PRSS1 (6.9 kb); PRSS3P2 (10 kb); WBP1LP1 (19 kb); TRBV29-1 (19 kb); TRBJ2-1 (26 kb); TRBJ2-2 (26 kb); TRBJ2-2P (27 kb); TRBJ2-3 (27 kb); TRBJ2-4 (27 kb); TRBJ2-5 (27 kb); TRBJ2-6 (27 kb); TRBJ2-7 (27 kb); TRBC2 (31 kb); PGBD4P1 (37 kb); TRBV28 (39 kb); TRBV30 (42 kb); TRBV27 (44 kb); TRBVB (48 kb)	-0.686243	-0.257576		0.341419	NA	C7orf34 | ENST00000390397 | ENST00000390401 | ENST00000390418 | ENST00000390419 | PRSS1 | PRSS2 | TRBV19 | unnamed		ACP vs. all controls	1.84026	1.69-2	39.26	1.82382	1.64-2	22.3277	2.01248	1.79-2.3	30.7111
rs12688091	23	106374858	A	G	0.3113	0	0.807	rs12688091	1	TRUE	NUP62CL (0 kb, intron/NMD transcript/MODIFIER | intron/Intron/MODIFIER); RP13-383K5.4 (0.029 kb, near_gene/Upstream gene/MODIFIER)					0.777 Pancreatitis		CDIPT	ACP vs. all controls	2.57068	2.22-2.9	32.0063	2.8447	2.27-3.6	17.8625	2.5502	2.13-3	21.4658
rs12688220	23	106244767	T	C	0.2833	0	0.932	rs12688091	0.8418	FALSE	MORC4 (1.3 kb, near_gene/Upstream gene/MODIFIER)					1 Pancreatitis		CDIPT	ACP vs. all controls	2.45982	2.13-2.9	31.926	2.65861	2.17-3.3	16.9657	2.45828	2.08-2.9	21.6296
chrX:106439174:I	23	106439174	AT	A	0.3052	0	0.8	rs12688091	0.957836	FALSE	NUP62CL (0 kb, intron/NMD transcript/MODIFIER | intron/Intron/MODIFIER)					0.753 Pancreatitis		CDIPT	ACP vs. all controls	2.57895	2.22-3	31.7223	2.8133	2.27-3.6	17.153	2.5356	2.13-3	20.8685
chrX:106434941:I	23	106434941	CA	C	0.3137	0	0.787	rs12688091	0.958754	FALSE	NUP62CL (0 kb, intron/NMD transcript/MODIFIER | intron/Intron/MODIFIER)					0.745 Pancreatitis		CDIPT	ACP vs. all controls	2.57895	2.22-3	31.5597	2.79452	2.22-3.4	16.999	2.56246	2.13-3.1	21.1507
rs4726575	7	142454868	G	T	0.3924	0	0.882	rs4726575	1	TRUE	PRSS1 (2.5 kb, near_gene/Upstream gene/MODIFIER); TRBV29-1 (6.1 kb); PRSS3P1 (13 kb); PRSS3P2 (23 kb); PGBD4P1 (24 kb); TRBV28 (26 kb); TRBV27 (31 kb); WBP1LP1 (32 kb); TRBVB (35 kb); TRBJ2-1 (39 kb); TRBJ2-2 (39 kb); TRBJ2-2P (40 kb); TRBJ2-3 (40 kb); TRBJ2-4 (40 kb); TRBJ2-5 (40 kb); TRBJ2-6 (40 kb); TRBJ2-7 (40 kb); TRBC2 (44 kb)	-0.495676	-0.242402	0.274	0.454029	0.742 Pancreatitis	C7orf34 | ENST00000390397 | ENST00000390401 | ENST00000390418 | ENST00000390419 | EPHB6 | PGBD4P1 | PRSS1 | PRSS3P1 | PRSS3P2 | TRBV19 | TRBV21-1 | TRBV24-1 | TRBV27 | TRBV28 | TRBV29-1 | TRBV7-8 | U66060.1-19 | U66060.1-23 | U66061.1-11 | unnamed		ACP vs. all controls	1.76929	1.61-1.9	31.0701	1.66003	1.47-1.9	14.6933	1.97122	1.75-2.2	26.2706
rs2367343	7	142453778	C	T	0.3895	0	0.889	rs4726575	0.978929	FALSE	PRSS1 (3.5 kb, near_gene/Upstream gene/MODIFIER); TRBV29-1 (5 kb); PRSS3P1 (14 kb); PGBD4P1 (23 kb); PRSS3P2 (24 kb); TRBV28 (25 kb); TRBV27 (30 kb); WBP1LP1 (33 kb); TRBVB (34 kb); TRBJ2-1 (40 kb); TRBJ2-2 (40 kb); TRBJ2-2P (41 kb); TRBJ2-3 (41 kb); TRBJ2-4 (41 kb); TRBJ2-5 (41 kb); TRBJ2-6 (41 kb); TRBJ2-7 (41 kb); TRBC2 (45 kb); TRBV26 (50 kb)	-0.151016	-0.188603	3.551	0.823608	0.75 Pancreatitis	C7orf34 | ENST00000390397 | ENST00000390401 | ENST00000390418 | ENST00000390419 | EPHB6 | PGBD4P1 | PRSS1 | PRSS3P1 | PRSS3P2 | TRBV19 | TRBV21-1 | TRBV24-1 | TRBV27 | TRBV28 | TRBV29-1 | TRBV7-8 | U66060.1-19 | U66060.1-23 | U66061.1-11 | unnamed		ACP vs. all controls	1.7618	1.61-1.9	31.0162	1.66223	1.47-1.9	14.8126	1.96117	1.75-2.2	26.1388
rs3857775	7	142452822	G	C	0.3872	0	0.896	rs4726575	0.985276	FALSE	TRBV29-1 (4.1 kb, near_gene/Downstream gene/MODIFIER); PRSS1 (4.5 kb, near_gene/Upstream gene/MODIFIER); PRSS3P1 (15 kb); PGBD4P1 (22 kb); TRBV28 (24 kb); PRSS3P2 (25 kb); TRBV27 (29 kb); TRBVB (33 kb); WBP1LP1 (34 kb); TRBJ2-1 (41 kb); TRBJ2-2 (41 kb); TRBJ2-2P (42 kb); TRBJ2-3 (42 kb); TRBJ2-4 (42 kb); TRBJ2-5 (42 kb); TRBJ2-6 (42 kb); TRBJ2-7 (42 kb); TRBC2 (46 kb); TRBV26 (49 kb)	-0.0875857	-0.18775	3.988	0.691156	0.763 Pancreatitis	C7orf34 | ENST00000390397 | ENST00000390401 | ENST00000390418 | ENST00000390419 | EPHB6 | PGBD4P1 | PRSS1 | PRSS3P1 | PRSS3P2 | TRBV19 | TRBV21-1 | TRBV24-1 | TRBV27 | TRBV28 | TRBV29-1 | TRBV7-8 | U66060.1-19 | U66060.1-23 | U66061.1-11 | unnamed		ACP vs. all controls	1.7584	1.61-1.9	30.9424	1.6559	1.47-1.9	14.6487	1.95351	1.72-2.2	26.0124
rs11761222	7	142454655	C	A	0.399	0	0.867	rs4726575	0.97238	FALSE	PRSS1 (2.7 kb, near_gene/Upstream gene/MODIFIER); TRBV29-1 (5.9 kb); PRSS3P1 (14 kb); PRSS3P2 (23 kb); PGBD4P1 (24 kb); TRBV28 (26 kb); TRBV27 (31 kb); WBP1LP1 (32 kb); TRBVB (35 kb); TRBJ2-1 (39 kb); TRBJ2-2 (40 kb); TRBJ2-2P (40 kb); TRBJ2-3 (40 kb); TRBJ2-4 (40 kb); TRBJ2-5 (40 kb); TRBJ2-6 (40 kb); TRBJ2-7 (40 kb); TRBC2 (44 kb)	-0.3779	-0.225702	0.123	0.608531	0.703 Pancreatitis	C7orf34 | ENST00000390397 | ENST00000390401 | ENST00000390418 | ENST00000390419 | EPHB6 | PGBD4P1 | PRSS1 | PRSS3P1 | PRSS3P2 | TRBV19 | TRBV21-1 | TRBV24-1 | TRBV27 | TRBV28 | TRBV29-1 | TRBV7-8 | U66060.1-19 | U66060.1-23 | U66061.1-11 | unnamed		ACP vs. all controls	1.76897	1.61-1.9	30.9207	1.66834	1.47-1.9	14.829	1.97394	1.75-2.2	26.1241
rs4527797	7	142453788	G	C	0.3808	0	0.878	rs4726575	0.963573	FALSE	PRSS1 (3.5 kb, near_gene/Upstream gene/MODIFIER); TRBV29-1 (5 kb); PRSS3P1 (14 kb); PGBD4P1 (23 kb); PRSS3P2 (24 kb); TRBV28 (25 kb); TRBV27 (30 kb); WBP1LP1 (33 kb); TRBVB (34 kb); TRBJ2-1 (40 kb); TRBJ2-2 (40 kb); TRBJ2-2P (41 kb); TRBJ2-3 (41 kb); TRBJ2-4 (41 kb); TRBJ2-5 (41 kb); TRBJ2-6 (41 kb); TRBJ2-7 (41 kb); TRBC2 (45 kb); TRBV26 (50 kb)	-0.187263	-0.193745	0.864	0.760973	0.71 Pancreatitis	C7orf34 | ENST00000390397 | ENST00000390401 | ENST00000390418 | ENST00000390419 | EPHB6 | PGBD4P1 | PRSS1 | PRSS3P1 | PRSS3P2 | TRBV19 | TRBV21-1 | TRBV24-1 | TRBV27 | TRBV28 | TRBV29-1 | TRBV7-8 | U66060.1-19 | U66060.1-23 | U66061.1-11 | unnamed		ACP vs. all controls	1.7732	1.62-1.94	30.911	1.6669	1.48-1.88	14.6903	1.9537	1.73-2.2	25.5268
rs10246334	7	142454557	T	G	0.3878	0	0.89	rs4726575	0.986347	FALSE	PRSS1 (2.8 kb, near_gene/Upstream gene/MODIFIER); TRBV29-1 (5.8 kb); PRSS3P1 (14 kb); PRSS3P2 (24 kb); PGBD4P1 (24 kb); TRBV28 (26 kb); TRBV27 (31 kb); WBP1LP1 (32 kb); TRBVB (35 kb); TRBJ2-1 (39 kb); TRBJ2-2 (40 kb); TRBJ2-2P (40 kb); TRBJ2-3 (40 kb); TRBJ2-4 (40 kb); TRBJ2-5 (40 kb); TRBJ2-6 (40 kb); TRBJ2-7 (41 kb); TRBC2 (44 kb)	-0.452438	-0.243066	0.485	0.483319	0.763 Pancreatitis	C7orf34 | ENST00000390388 | ENST00000390397 | ENST00000390401 | ENST00000390418 | ENST00000390419 | EPHB6 | PGBD4P1 | PRSS1 | PRSS3P1 | PRSS3P2 | TRBV19 | TRBV21-1 | TRBV24-1 | TRBV27 | TRBV28 | TRBV29-1 | TRBV7-8 | U66060.1-19 | U66060.1-21 | U66060.1-23 | U66061.1-11 | unnamed		ACP vs. all controls	1.76211	1.61-1.9	30.9034	1.66251	1.47-1.9	14.7755	1.9581	1.75-2.2	26.0215
rs10081384	7	142449301	T	C	0.387	0	0.899	rs4726575	0.98467	FALSE	TRBV29-1 (0.56 kb, near_gene/Downstream gene/MODIFIER); PRSS1 (8 kb); PGBD4P1 (19 kb); PRSS3P1 (19 kb); TRBV28 (20 kb); TRBV27 (26 kb); PRSS3P2 (29 kb); TRBVB (30 kb); WBP1LP1 (37 kb); TRBJ2-1 (45 kb); TRBJ2-2 (45 kb); TRBJ2-2P (45 kb); TRBJ2-3 (45 kb); TRBV26 (45 kb); TRBJ2-4 (45 kb); TRBJ2-5 (46 kb); TRBJ2-6 (46 kb); TRBJ2-7 (46 kb); TRBC2 (49 kb)	-0.0081458	-0.156241	5.131	0.580382	0.763 Pancreatitis	C7orf34 | ENST00000390397 | ENST00000390401 | ENST00000390418 | ENST00000390419 | EPHB6 | PGBD4P1 | PRSS1 | PRSS3P1 | PRSS3P2 | TRBV19 | TRBV21-1 | TRBV24-1 | TRBV27 | TRBV28 | TRBV29-1 | TRBV7-8 | U66060.1-19 | U66060.1-23 | U66061.1-11 | unnamed		ACP vs. all controls	1.75716	1.61-1.9	30.8677	1.65317	1.47-1.9	14.6497	1.95046	1.72-2.2	25.9786
rs2187629	7	142445028	T	C	0.3869	0	0.902	rs4726575	0.984586	FALSE	TRBV29-1 (3 kb, near_gene/Upstream gene/MODIFIER); PRSS1 (12 kb); PGBD4P1 (14 kb); TRBV28 (16 kb); TRBV27 (21 kb); PRSS3P1 (23 kb); TRBVB (25 kb); PRSS3P2 (33 kb); TRBV26 (41 kb); WBP1LP1 (41 kb); TRBJ2-1 (49 kb); TRBJ2-2 (49 kb); TRBJ2-2P (49 kb); TRBJ2-3 (50 kb); TRBJ2-4 (50 kb); TRBJ2-5 (50 kb); TRBJ2-6 (50 kb)	-0.355083	-0.217154	4.64	0.653527	0.763 Pancreatitis	C7orf34 | ENST00000390397 | ENST00000390401 | ENST00000390418 | ENST00000390419 | EPHB6 | PGBD4P1 | PRSS1 | PRSS3P1 | PRSS3P2 | TRBV19 | TRBV21-1 | TRBV24-1 | TRBV27 | TRBV28 | TRBV29-1 | TRBV7-8 | U66060.1-19 | U66060.1-23 | U66061.1-11 | unnamed		ACP vs. all controls	1.75285	1.61-1.9	30.7383	1.64989	1.47-1.9	14.5866	1.94666	1.72-2.2	25.9158
rs1964986	7	142447631	C	A	0.3811	0	0.882	rs4726575	0.966194	FALSE	TRBV29-1 (0.42 kb, near_gene/Upstream gene/MODIFIER); PRSS1 (9.7 kb); PGBD4P1 (17 kb); TRBV28 (19 kb); PRSS3P1 (21 kb); TRBV27 (24 kb); TRBVB (28 kb); PRSS3P2 (30 kb); WBP1LP1 (39 kb); TRBV26 (44 kb); TRBJ2-1 (46 kb); TRBJ2-2 (47 kb); TRBJ2-2P (47 kb); TRBJ2-3 (47 kb); TRBJ2-4 (47 kb); TRBJ2-5 (47 kb); TRBJ2-6 (47 kb); TRBJ2-7 (48 kb)	0.0801917	0.460543	5.549	0.757216	0.705 Pancreatitis	C7orf34 | ENST00000390388 | ENST00000390397 | ENST00000390401 | ENST00000390418 | ENST00000390419 | EPHB6 | PGBD4P1 | PRSS1 | PRSS3P1 | PRSS3P2 | TRBV19 | TRBV21-1 | TRBV24-1 | TRBV27 | TRBV28 | TRBV29-1 | U66060.1-19 | U66060.1-21 | U66060.1-23 | U66061.1-11 | unnamed		ACP vs. all controls	1.7676	1.61-1.93	30.7097	1.658	1.47-1.87	14.4453	1.9413	1.72-2.19	25.2206
rs1964987	7	142447636	G	A	0.3811	0	0.882	rs4726575	0.966194	FALSE	TRBV29-1 (0.42 kb, near_gene/Upstream gene/MODIFIER); PRSS1 (9.7 kb); PGBD4P1 (17 kb); TRBV28 (19 kb); PRSS3P1 (21 kb); TRBV27 (24 kb); TRBVB (28 kb); PRSS3P2 (30 kb); WBP1LP1 (39 kb); TRBV26 (44 kb); TRBJ2-1 (46 kb); TRBJ2-2 (47 kb); TRBJ2-2P (47 kb); TRBJ2-3 (47 kb); TRBJ2-4 (47 kb); TRBJ2-5 (47 kb); TRBJ2-6 (47 kb); TRBJ2-7 (48 kb)	-0.0772953	0.435723	2.02	0.62385	0.705 Pancreatitis	C7orf34 | ENST00000390397 | ENST00000390401 | ENST00000390418 | ENST00000390419 | EPHB6 | PGBD4P1 | PRSS1 | PRSS3P1 | PRSS3P2 | TRBV19 | TRBV21-1 | TRBV24-1 | TRBV27 | TRBV28 | TRBV29-1 | U66060.1-19 | U66060.1-23 | U66061.1-11 | unnamed		ACP vs. all controls	1.7676	1.61-1.93	30.7097	1.658	1.47-1.87	14.4453	1.9413	1.72-2.19	25.2206
rs10081173	7	142447313	G	A	0.3794	0	0.886	rs4726575	0.968345	FALSE	TRBV29-1 (0.74 kb, near_gene/Upstream gene/MODIFIER); PRSS1 (10 kb); PGBD4P1 (17 kb); TRBV28 (18 kb); PRSS3P1 (21 kb); TRBV27 (24 kb); TRBVB (28 kb); PRSS3P2 (31 kb); WBP1LP1 (39 kb); TRBV26 (43 kb); TRBJ2-1 (47 kb); TRBJ2-2 (47 kb); TRBJ2-2P (47 kb); TRBJ2-3 (47 kb); TRBJ2-4 (47 kb); TRBJ2-5 (47 kb); TRBJ2-6 (48 kb); TRBJ2-7 (48 kb)	-0.102251	-0.16737	2.112	0.569578	0.719 Pancreatitis	C7orf34 | ENST00000390397 | ENST00000390401 | ENST00000390418 | ENST00000390419 | EPHB6 | PGBD4P1 | PRSS1 | PRSS3P1 | PRSS3P2 | TRBV19 | TRBV21-1 | TRBV24-1 | TRBV27 | TRBV28 | TRBV29-1 | TRBV7-8 | U66060.1-19 | U66060.1-23 | U66061.1-11 | unnamed		ACP vs. all controls	1.7627	1.61-1.93	30.5487	1.6562	1.47-1.87	14.4314	1.9397	1.72-2.18	25.1602
rs10282054	7	142446452	G	A	0.3794	0	0.887	rs4726575	0.968358	FALSE	TRBV29-1 (1.6 kb, near_gene/Upstream gene/MODIFIER); PRSS1 (11 kb); PGBD4P1 (16 kb); TRBV28 (17 kb); PRSS3P1 (22 kb); TRBV27 (23 kb); TRBVB (27 kb); PRSS3P2 (32 kb); WBP1LP1 (40 kb); TRBV26 (42 kb); TRBJ2-1 (48 kb); TRBJ2-2 (48 kb); TRBJ2-2P (48 kb); TRBJ2-3 (48 kb); TRBJ2-4 (48 kb); TRBJ2-5 (48 kb); TRBJ2-6 (48 kb); TRBJ2-7 (49 kb)	-0.105039	-0.181153	5.666	0.429421	0.719 Pancreatitis	C7orf34 | ENST00000390397 | ENST00000390401 | ENST00000390418 | ENST00000390419 | EPHB6 | PGBD4P1 | PRSS1 | PRSS3P1 | PRSS3P2 | TRBV19 | TRBV21-1 | TRBV24-1 | TRBV27 | TRBV28 | TRBV29-1 | TRBV7-8 | U66060.1-19 | U66060.1-23 | U66061.1-11 | unnamed		ACP vs. all controls	1.7624	1.61-1.93	30.5309	1.6559	1.47-1.87	14.4216	1.9393	1.72-2.18	25.1451
rs10447734	7	142440407	G	A	0.3896	0	0.91	rs4726575	0.972699	FALSE	TRBV29-1 (7.6 kb); PGBD4P1 (9.8 kb); TRBV28 (11 kb); TRBV27 (17 kb); PRSS1 (17 kb); TRBVB (21 kb); PRSS3P1 (28 kb); TRBV26 (36 kb); PRSS3P2 (38 kb); WBP1LP1 (46 kb)	-0.362753	-0.228726	1.483	0.366724	0.761 Pancreatitis	C7orf34 | ENST00000390388 | ENST00000390397 | ENST00000390401 | ENST00000390418 | ENST00000390419 | EPHB6 | PGBD4P1 | PRSS1 | PRSS3P1 | PRSS3P2 | TRBV19 | TRBV21-1 | TRBV24-1 | TRBV27 | TRBV28 | TRBV29-1 | TRBV7-8 | U66060.1-19 | U66060.1-21 | U66060.1-23 | U66061.1-11 | unnamed		ACP vs. all controls	1.74155	1.59-1.9	30.4445	1.65207	1.47-1.9	14.7523	1.9279	1.72-2.2	25.4386
chr7:142452496:D	7	142452496	CATATT	C	0.377	0	0.878	rs4726575	0.962756	FALSE	TRBV29-1 (3.8 kb); PRSS1 (4.8 kb); PRSS3P1 (16 kb); PGBD4P1 (22 kb); TRBV28 (24 kb); PRSS3P2 (26 kb); TRBV27 (29 kb); TRBVB (33 kb); WBP1LP1 (34 kb); TRBJ2-1 (42 kb); TRBJ2-2 (42 kb); TRBJ2-2P (42 kb); TRBJ2-3 (42 kb); TRBJ2-4 (42 kb); TRBJ2-5 (42 kb); TRBJ2-6 (42 kb); TRBJ2-7 (43 kb); TRBC2 (46 kb); TRBV26 (48 kb)			9.237		0.7 Pancreatitis	C7orf34 | ENST00000390397 | ENST00000390401 | ENST00000390418 | ENST00000390419 | EPHB6 | PGBD4P1 | PRSS1 | PRSS3P1 | PRSS3P2 | TRBV19 | TRBV21-1 | TRBV24-1 | TRBV27 | TRBV28 | TRBV29-1 | U66060.1-19 | U66060.1-23 | U66061.1-11 | unnamed		ACP vs. all controls	1.7664	1.61-1.93	30.3829	1.6551	1.47-1.87	14.2622	1.9365	1.72-2.18	24.7241
chr7:142448199:D	7	142448199	G	GGGTGGAAA	0.4041	0	0.875	rs4726575	0.938794	FALSE	TRBV29-1 (0 kb, intron/Intron/MODIFIER); PRSS1 (9.1 kb); PGBD4P1 (18 kb); TRBV28 (19 kb); PRSS3P1 (20 kb); TRBV27 (25 kb); TRBVB (28 kb); PRSS3P2 (30 kb); WBP1LP1 (38 kb); TRBV26 (44 kb); TRBJ2-1 (46 kb); TRBJ2-2 (46 kb); TRBJ2-2P (46 kb); TRBJ2-3 (46 kb); TRBJ2-4 (46 kb); TRBJ2-5 (47 kb); TRBJ2-6 (47 kb); TRBJ2-7 (47 kb)			3.492		0.719 Pancreatitis	C7orf34 | ENST00000390397 | ENST00000390401 | ENST00000390418 | ENST00000390419 | EPHB6 | PGBD4P1 | PRSS1 | PRSS3P1 | PRSS3P2 | TRBV19 | TRBV21-1 | TRBV24-1 | TRBV27 | TRBV28 | TRBV29-1 | TRBV7-8 | U66060.1-19 | U66060.1-23 | U66061.1-11 | unnamed		ACP vs. all controls	1.74216	1.59-1.9	29.8375	1.63079	1.45-1.9	13.7353	1.94477	1.72-2.2	25.3516
rs7810050	7	142435691	A	G	0.3718	0	0.903	rs4726575	0.91966	FALSE	PGBD4P1 (5.1 kb); TRBV28 (6.7 kb); TRBV27 (12 kb); TRBV29-1 (12 kb); TRBVB (16 kb); PRSS1 (22 kb); TRBV26 (32 kb); PRSS3P1 (33 kb); PRSS3P2 (42 kb); TRBVA (46 kb)	-0.599473	-0.255991	5.801	0.180468	0.689 Pancreatitis	C7orf34 | ENST00000390397 | ENST00000390401 | ENST00000390418 | ENST00000390419 | EPHB6 | PGBD4P1 | PRSS1 | PRSS3P1 | PRSS3P2 | TRBV19 | TRBV21-1 | TRBV24-1 | TRBV27 | TRBV28 | TRBV29-1 | TRBV7-8 | U66060.1-19 | U66060.1-23 | U66061.1-11 | unnamed		ACP vs. all controls	1.7381	1.59-1.9	29.4699	1.6393	1.46-1.85	13.9255	1.8892	1.68-2.13	23.6407
rs4726583	7	142472604	A	T	0.398	0	0.802	rs4726575	0.837062	FALSE	PRSS3P1 (0.81 kb, near_gene/Downstream gene/MODIFIER); PRSS3P2 (5.5 kb); PRSS1 (12 kb); WBP1LP1 (14 kb); TRBJ2-1 (21 kb); TRBJ2-2 (22 kb); TRBJ2-2P (22 kb); TRBJ2-3 (22 kb); TRBJ2-4 (22 kb); TRBJ2-5 (22 kb); TRBJ2-6 (22 kb); TRBJ2-7 (23 kb); TRBV29-1 (24 kb); TRBC2 (26 kb); TRBV30 (38 kb); PGBD4P1 (42 kb); TRBV28 (44 kb); TRBV27 (49 kb)	-0.608358	-0.248917	0.185	0.0855165	0.899 Pancreatitis	C7orf34 | ENST00000390397 | ENST00000390401 | ENST00000390418 | ENST00000390419 | EPHB6 | PRSS1 | PRSS3P1 | PRSS3P2 | TRBV19 | TRBV21-1 | TRBV24-1 | TRBV27 | TRBV28 | TRBV29-1 | U66060.1-19 | U66060.1-23 | U66061.1-11 | unnamed		ACP vs. all controls	1.77968	1.61-2	29.4152	1.7452	1.54-2	15.9765	2.00844	1.79-2.3	25.1489
rs4726582	7	142472600	A	T	0.3975	0	0.803	rs4726575	0.838166	FALSE	PRSS3P1 (0.81 kb, near_gene/Downstream gene/MODIFIER); PRSS3P2 (5.5 kb); PRSS1 (12 kb); WBP1LP1 (14 kb); TRBJ2-1 (21 kb); TRBJ2-2 (22 kb); TRBJ2-2P (22 kb); TRBJ2-3 (22 kb); TRBJ2-4 (22 kb); TRBJ2-5 (22 kb); TRBJ2-6 (22 kb); TRBJ2-7 (23 kb); TRBV29-1 (24 kb); TRBC2 (26 kb); TRBV30 (38 kb); PGBD4P1 (42 kb); TRBV28 (44 kb); TRBV27 (49 kb)	-0.680654	-0.259991	0.286	0.154751	0.899 Pancreatitis	C7orf34 | ENST00000390397 | ENST00000390401 | ENST00000390418 | ENST00000390419 | EPHB6 | PRSS1 | PRSS3P1 | PRSS3P2 | TRBV19 | TRBV21-1 | TRBV24-1 | TRBV27 | TRBV28 | TRBV29-1 | U66060.1-19 | U66060.1-23 | U66061.1-11 | unnamed		ACP vs. all controls	1.77778	1.61-2	29.3099	1.74856	1.54-2	16.0335	2.00481	1.75-2.3	25.0235
rs10273639	7	142456928	C	T	0.3958	0	0.829	rs4726575	0.875755	FALSE	PRSS1 (0.39 kb, near_gene/Upstream gene/MODIFIER); TRBV29-1 (8.2 kb); PRSS3P1 (11 kb); PRSS3P2 (21 kb); PGBD4P1 (26 kb); TRBV28 (28 kb); WBP1LP1 (30 kb); TRBV27 (33 kb); TRBJ2-1 (37 kb); TRBVB (37 kb); TRBJ2-2 (37 kb); TRBJ2-2P (37 kb); TRBJ2-3 (38 kb); TRBJ2-4 (38 kb); TRBJ2-5 (38 kb); TRBJ2-6 (38 kb); TRBJ2-7 (38 kb); TRBC2 (42 kb)	-0.462325	-0.236183	0.736	0.535445	1 Pancreatitis	C7orf34 | ENST00000390388 | ENST00000390397 | ENST00000390401 | ENST00000390418 | ENST00000390419 | EPHB6 | PRSS1 | PRSS3P1 | PRSS3P2 | TRBV19 | TRBV21-1 | TRBV24-1 | TRBV27 | TRBV28 | TRBV29-1 | U66060.1-19 | U66060.1-21 | U66060.1-23 | U66061.1-11 | unnamed		ACP vs. all controls	1.76429	1.61-1.9	29.2721	1.70999	1.52-1.9	15.5273	1.97628	1.75-2.2	24.9353
rs13225332	7	142469191	G	A	0.3948	0	0.808	rs4726575	0.84308	FALSE	PRSS3P1 (0 kb, intron/Intron/MODIFIER | nc-RNA/Non coding transcript/MODIFIER | near_gene/Upstream gene/MODIFIER); PRSS1 (8.3 kb); PRSS3P2 (8.9 kb); WBP1LP1 (17 kb); TRBV29-1 (20 kb); TRBJ2-1 (25 kb); TRBJ2-2 (25 kb); TRBJ2-2P (25 kb); TRBJ2-3 (25 kb); TRBJ2-4 (25 kb); TRBJ2-5 (26 kb); TRBJ2-6 (26 kb); TRBJ2-7 (26 kb); TRBC2 (30 kb); PGBD4P1 (39 kb); TRBV28 (40 kb); TRBV30 (41 kb); TRBV27 (46 kb)…	-0.114708	-0.18009	3.502	0.54344	0.91 Pancreatitis	C7orf34 | ENST00000390397 | ENST00000390401 | ENST00000390418 | ENST00000390419 | EPHB6 | PRSS1 | PRSS3P1 | PRSS3P2 | TRBV19 | TRBV21-1 | TRBV24-1 | TRBV27 | TRBV28 | TRBV29-1 | U66060.1-19 | U66060.1-23 | U66061.1-11 | unnamed		ACP vs. all controls	1.7749	1.62-1.95	29.269	1.7384	1.53-1.97	15.8117	1.9974	1.76-2.26	24.9934
rs9969188	7	142455953	G	A	0.39	0	0.829	rs4726575	0.877675	FALSE	PRSS1 (1.4 kb, near_gene/Upstream gene/MODIFIER); TRBV29-1 (7.2 kb); PRSS3P1 (12 kb); PRSS3P2 (22 kb); PGBD4P1 (25 kb); TRBV28 (27 kb); WBP1LP1 (30 kb); TRBV27 (32 kb); TRBVB (36 kb); TRBJ2-1 (38 kb); TRBJ2-2 (38 kb); TRBJ2-2P (38 kb); TRBJ2-3 (39 kb); TRBJ2-4 (39 kb); TRBJ2-5 (39 kb); TRBJ2-6 (39 kb); TRBJ2-7 (39 kb); TRBC2 (43 kb)	-0.54258	-0.240221	0.238	0.142368	0.954 Pancreatitis	C7orf34 | ENST00000390397 | ENST00000390401 | ENST00000390418 | ENST00000390419 | EPHB6 | PRSS1 | PRSS3P1 | PRSS3P2 | TRBV19 | TRBV21-1 | TRBV24-1 | TRBV27 | TRBV28 | TRBV29-1 | U66060.1-19 | U66060.1-21 | U66060.1-23 | U66061.1-11 | unnamed		ACP vs. all controls	1.76211	1.61-1.9	29.1491	1.70561	1.52-1.9	15.3402	1.94666	1.72-2.2	24.1781
rs10258394	7	142463307	T	C	0.4001	0	0.82	rs4726575	0.867549	FALSE	PRSS1 (2.4 kb, near_gene/Downstream gene/MODIFIER); PRSS3P1 (5 kb, near_gene/Upstream gene/MODIFIER); TRBV29-1 (15 kb); PRSS3P2 (15 kb); WBP1LP1 (23 kb); TRBJ2-1 (31 kb); TRBJ2-2 (31 kb); TRBJ2-2P (31 kb); TRBJ2-3 (31 kb); TRBJ2-4 (31 kb); TRBJ2-5 (31 kb); TRBJ2-6 (32 kb); TRBJ2-7 (32 kb); PGBD4P1 (33 kb); TRBV28 (34 kb); TRBC2 (35 kb); TRBV27 (40 kb); TRBVB (44 kb); TRBV30 (47 kb)	-0.755609	-0.266629	0.109	0.373812	0.948 Pancreatitis	C7orf34 | ENST00000390397 | ENST00000390401 | ENST00000390418 | ENST00000390419 | EPHB6 | PRSS1 | PRSS3P1 | PRSS3P2 | TRBV19 | TRBV21-1 | TRBV24-1 | TRBV27 | TRBV28 | TRBV29-1 | U66060.1-19 | U66060.1-23 | U66061.1-11 | unnamed		ACP vs. all controls	1.76087	1.61-1.9	29.079	1.70648	1.52-1.9	15.3215	1.98177	1.75-2.2	25.1312
rs11765409	7	142469343	T	C	0.3953	0	0.808	rs4726575	0.843039	FALSE	PRSS3P1 (0 kb, nc-exon/Non coding transcript exon/MODIFIER | nc-RNA/Non coding transcript/MODIFIER | near_gene/Upstream gene/MODIFIER); PRSS1 (8.4 kb); PRSS3P2 (8.7 kb); WBP1LP1 (17 kb); TRBV29-1 (21 kb); TRBJ2-1 (25 kb); TRBJ2-2 (25 kb); TRBJ2-2P (25 kb); TRBJ2-3 (25 kb); TRBJ2-4 (25 kb); TRBJ2-5 (25 kb); TRBJ2-6 (26 kb); TRBJ2-7 (26 kb); TRBC2 (29 kb); PGBD4P1 (39 kb); TRBV28 (40 kb); TRBV30 (4…	-0.357452	-0.223095	4.341	0.827179	0.905 Pancreatitis	C7orf34 | ENST00000390397 | ENST00000390401 | ENST00000390418 | ENST00000390419 | EPHB6 | PRSS1 | PRSS3P1 | PRSS3P2 | TRBV19 | TRBV21-1 | TRBV24-1 | TRBV27 | TRBV28 | TRBV29-1 | U66060.1-19 | U66060.1-23 | U66061.1-11 | unnamed		ACP vs. all controls	1.76929	1.61-2	28.957	1.73461	1.54-2	15.7404	1.99442	1.75-2.3	24.8894
rs2855972	7	142463921	A	C	0.3987	0	0.821	rs4726575	0.866004	FALSE	PRSS1 (3 kb, near_gene/Downstream gene/MODIFIER); PRSS3P1 (4.3 kb, near_gene/Upstream gene/MODIFIER); PRSS3P2 (14 kb); TRBV29-1 (15 kb); WBP1LP1 (23 kb); TRBJ2-1 (30 kb); TRBJ2-2 (30 kb); TRBJ2-2P (30 kb); TRBJ2-3 (31 kb); TRBJ2-4 (31 kb); TRBJ2-5 (31 kb); TRBJ2-6 (31 kb); TRBJ2-7 (31 kb); PGBD4P1 (33 kb); TRBC2 (35 kb); TRBV28 (35 kb); TRBV27 (40 kb); TRBVB (44 kb); TRBV30 (46 kb)	-0.681914	-0.252678	0.426	0.243709	0.931 Pancreatitis	C7orf34 | ENST00000390397 | ENST00000390401 | ENST00000390418 | ENST00000390419 | EPHB6 | PRSS1 | PRSS3P1 | PRSS3P2 | TRBV19 | TRBV21-1 | TRBV24-1 | TRBV27 | TRBV28 | TRBV29-1 | U66060.1-19 | U66060.1-23 | U66061.1-11 | unnamed		ACP vs. all controls	1.7584	1.61-1.9	28.9392	1.70097	1.52-1.9	15.0546	1.98491	1.75-2.2	25.1661
rs1969595	7	142468189	C	G	0.3893	0	0.797	rs4726575	0.832327	FALSE	PRSS3P1 (0.075 kb, near_gene/Upstream gene/MODIFIER); PRSS1 (7.3 kb); PRSS3P2 (9.9 kb); WBP1LP1 (18 kb); TRBV29-1 (19 kb); TRBJ2-1 (26 kb); TRBJ2-2 (26 kb); TRBJ2-2P (26 kb); TRBJ2-3 (26 kb); TRBJ2-4 (26 kb); TRBJ2-5 (27 kb); TRBJ2-6 (27 kb); TRBJ2-7 (27 kb); TRBC2 (31 kb); PGBD4P1 (38 kb); TRBV28 (39 kb); TRBV30 (42 kb); TRBV27 (44 kb); TRBVB (48 kb)	-0.0335082	0.00574436	5.681	0.647135	0.899 Pancreatitis	C7orf34 | ENST00000390397 | ENST00000390401 | ENST00000390418 | ENST00000390419 | EPHB6 | PRSS1 | PRSS3P1 | PRSS3P2 | TRBV19 | TRBV21-1 | TRBV24-1 | TRBV27 | TRBV28 | TRBV29-1 | U66060.1-19 | U66060.1-23 | U66061.1-11 | unnamed		ACP vs. all controls	1.7764	1.62-1.95	28.881	1.7423	1.54-1.98	15.6518	1.9999	1.76-2.27	24.7043
rs12534595	7	142469942	G	C	0.398	0	0.805	rs4726575	0.83631	FALSE	PRSS3P1 (0 kb, intron/Intron/MODIFIER | nc-RNA/Non coding transcript/MODIFIER | near_gene/Upstream gene/MODIFIER); PRSS3P2 (8.1 kb); PRSS1 (9 kb); WBP1LP1 (17 kb); TRBV29-1 (21 kb); TRBJ2-1 (24 kb); TRBJ2-2 (24 kb); TRBJ2-2P (24 kb); TRBJ2-3 (25 kb); TRBJ2-4 (25 kb); TRBJ2-5 (25 kb); TRBJ2-6 (25 kb); TRBJ2-7 (25 kb); TRBC2 (29 kb); PGBD4P1 (39 kb); TRBV30 (40 kb); TRBV28 (41 kb); TRBV27 (46 kb)	-0.288367	-0.20616	1.926	0.504531	0.899 Pancreatitis	C7orf34 | ENST00000390397 | ENST00000390401 | ENST00000390418 | ENST00000390419 | EPHB6 | PRSS1 | PRSS3P1 | PRSS3P2 | TRBV19 | TRBV21-1 | TRBV24-1 | TRBV27 | TRBV28 | TRBV29-1 | U66060.1-19 | U66060.1-23 | U66061.1-11 | unnamed		ACP vs. all controls	1.76523	1.61-1.9	28.849	1.734	1.54-2	15.7216	1.98295	1.75-2.2	24.5648
rs4726587	7	142473119	C	A	0.4029	0	0.789	rs4726575	0.819667	FALSE	PRSS3P1 (1.3 kb, near_gene/Downstream gene/MODIFIER); PRSS3P2 (4.9 kb, near_gene/Upstream gene/MODIFIER); PRSS1 (12 kb); WBP1LP1 (13 kb); TRBJ2-1 (21 kb); TRBJ2-2 (21 kb); TRBJ2-2P (21 kb); TRBJ2-3 (21 kb); TRBJ2-4 (22 kb); TRBJ2-5 (22 kb); TRBJ2-6 (22 kb); TRBJ2-7 (22 kb); TRBV29-1 (24 kb); TRBC2 (26 kb); TRBV30 (37 kb); PGBD4P1 (43 kb); TRBV28 (44 kb); TRBV27 (49 kb)	-0.622535	-0.243266	0.074	0.337065	0.859 Pancreatitis	C7orf34 | ENST00000390397 | ENST00000390401 | ENST00000390418 | ENST00000390419 | EPHB6 | PRSS1 | PRSS3P1 | PRSS3P2 | TRBV19 | TRBV21-1 | TRBV24-1 | TRBV27 | TRBV28 | TRBV29-1 | U66060.1-19 | U66060.1-23 | U66061.1-11 | unnamed		ACP vs. all controls	1.77525	1.61-2	28.8182	1.7449	1.54-2	15.7315	1.99521	1.75-2.3	24.3964
rs2886990	7	142473983	T	C	0.3982	0	0.79	rs4726575	0.827634	FALSE	PRSS3P1 (2.2 kb, near_gene/Downstream gene/MODIFIER); PRSS3P2 (4.1 kb, near_gene/Upstream gene/MODIFIER); WBP1LP1 (12 kb); PRSS1 (13 kb); TRBJ2-1 (20 kb); TRBJ2-2 (20 kb); TRBJ2-2P (20 kb); TRBJ2-3 (21 kb); TRBJ2-4 (21 kb); TRBJ2-5 (21 kb); TRBJ2-6 (21 kb); TRBJ2-7 (21 kb); TRBC2 (25 kb); TRBV29-1 (25 kb); TRBV30 (36 kb); PGBD4P1 (43 kb); TRBV28 (45 kb)	-0.738966	-0.236118	0.266	0.302515	0.883 Pancreatitis	C7orf34 | ENST00000390397 | ENST00000390401 | ENST00000390418 | ENST00000390419 | EPHB6 | PRSS1 | PRSS3P1 | PRSS3P2 | TRBV19 | TRBV21-1 | TRBV24-1 | TRBV27 | TRBV28 | TRBV29-1 | U66060.1-19 | U66060.1-23 | U66061.1-11 | unnamed		ACP vs. all controls	1.77462	1.61-2	28.7837	1.74307	1.54-2	15.7219	2.01654	1.79-2.3	25.2005
rs34500324	7	142473096	T	C	0.3986	0	0.798	rs4726575	0.832544	FALSE	PRSS3P1 (1.3 kb, near_gene/Downstream gene/MODIFIER); PRSS3P2 (5 kb, near_gene/Upstream gene/MODIFIER); PRSS1 (12 kb); WBP1LP1 (13 kb); TRBJ2-1 (21 kb); TRBJ2-2 (21 kb); TRBJ2-2P (21 kb); TRBJ2-3 (21 kb); TRBJ2-4 (22 kb); TRBJ2-5 (22 kb); TRBJ2-6 (22 kb); TRBJ2-7 (22 kb); TRBV29-1 (24 kb); TRBC2 (26 kb); TRBV30 (37 kb); PGBD4P1 (43 kb); TRBV28 (44 kb); TRBV27 (49 kb)	-0.391008	-0.22086	2.045	0.275596	0.884 Pancreatitis	C7orf34 | ENST00000390397 | ENST00000390401 | ENST00000390418 | ENST00000390419 | EPHB6 | PRSS1 | PRSS3P1 | PRSS3P2 | TRBV19 | TRBV21-1 | TRBV24-1 | TRBV27 | TRBV28 | TRBV29-1 | U66060.1-19 | U66060.1-23 | U66061.1-11 | unnamed		ACP vs. all controls	1.77022	1.61-2	28.7748	1.73641	1.54-2	15.6561	1.98965	1.75-2.3	24.5743
rs6667	7	142460865	C	T	0.3986	0	0.823	rs4726575	0.874341	FALSE	PRSS1 (0 kb, 3'utr/3 prime UTR/MODIFIER | exon/Synonymous/LOW | nc-exon/Non coding transcript exon/MODIFIER | nc-RNA/Non coding transcript/MODIFIER | near_gene/Downstream gene/MODIFIER); PRSS3P1 (7.4 kb); TRBV29-1 (12 kb); PRSS3P2 (17 kb); WBP1LP1 (26 kb); PGBD4P1 (30 kb); TRBV28 (32 kb); TRBJ2-1 (33 kb); TRBJ2-2 (33 kb); TRBJ2-2P (34 kb); TRBJ2-3 (34 kb); TRBJ2-4 (34 kb); TRBJ2-5 (34 kb); TRBJ2-…	0.453676	-0.0757467	0.098	0.297866	0.966 Pancreatitis	C7orf34 | ENST00000390397 | ENST00000390401 | ENST00000390418 | ENST00000390419 | EPHB6 | PRSS1 | PRSS3P1 | PRSS3P2 | TRBV19 | TRBV21-1 | TRBV24-1 | TRBV27 | TRBV28 | TRBV29-1 | U66060.1-19 | U66060.1-23 | U66061.1-11 | unnamed		ACP vs. all controls	1.75439	1.59-1.9	28.7131	1.70068	1.52-1.9	15.183	1.97941	1.75-2.2	25.0471
MERGED_DEL_2_45450	7	142476156	A	-	0.3964	0	0.793	rs4726575	0.828889	FALSE	PRSS3P2 (1.9 kb); PRSS3P1 (4.4 kb); WBP1LP1 (10 kb); PRSS1 (15 kb); TRBJ2-1 (18 kb); TRBJ2-2 (18 kb); TRBJ2-2P (18 kb); TRBJ2-3 (18 kb); TRBJ2-4 (19 kb); TRBJ2-5 (19 kb); TRBJ2-6 (19 kb); TRBJ2-7 (19 kb); TRBC2 (23 kb); TRBV29-1 (27 kb); TRBV30 (34 kb); PGBD4P1 (46 kb); TRBV28 (47 kb)					0.892 Pancreatitis	C7orf34 | ENST00000390397 | ENST00000390401 | ENST00000390418 | ENST00000390419 | EPHB6 | PRSS1 | PRSS3P1 | PRSS3P2 | TRBV19 | TRBV21-1 | TRBV24-1 | TRBV27 | TRBV28 | TRBV29-1 | U66060.1-19 | U66060.1-23 | U66061.1-11 | unnamed		ACP vs. all controls	1.7733	1.61-1.95	28.7113	1.7323	1.53-1.96	15.4826	1.982	1.75-2.25	24.1635
rs7057398	23	106144529	C	T	0.3207	0	0.941	rs7057398	1	TRUE	MORC4 (0 kb, intron/Intron/MODIFIER); RIPPLY1 (0 kb, intron/Intron/MODIFIER); CLDN2 (0 kb, intron/Intron/MODIFIER)					0.74 Pancreatitis		CDIPT | PDGFD	ACP vs. all controls	2.28114	2-2.6	28.6327	2.47844	2.04-3	15.9358	2.23033	1.89-2.6	18.8009
rs10952532	7	142474939	T	C	0.3974	0	0.791	rs4726575	0.83095	FALSE	PRSS3P2 (3.1 kb, near_gene/Upstream gene/MODIFIER); PRSS3P1 (3.1 kb, near_gene/Downstream gene/MODIFIER); WBP1LP1 (12 kb); PRSS1 (14 kb); TRBJ2-1 (19 kb); TRBJ2-2 (19 kb); TRBJ2-2P (19 kb); TRBJ2-3 (20 kb); TRBJ2-4 (20 kb); TRBJ2-5 (20 kb); TRBJ2-6 (20 kb); TRBJ2-7 (20 kb); TRBC2 (24 kb); TRBV29-1 (26 kb); TRBV30 (35 kb); PGBD4P1 (44 kb); TRBV28 (46 kb)	-0.68804	-0.265931	2.014	0.0748657	0.888 Pancreatitis	C7orf34 | ENST00000390397 | ENST00000390401 | ENST00000390418 | ENST00000390419 | EPHB6 | PRSS1 | PRSS3P1 | PRSS3P2 | TRBV19 | TRBV21-1 | TRBV24-1 | TRBV27 | TRBV28 | TRBV29-1 | U66060.1-19 | U66060.1-23 | U66061.1-11 | unnamed		ACP vs. all controls	1.7713	1.61-1.95	28.602	1.7403	1.54-1.97	15.6831	2.001	1.77-2.27	24.7421
rs55833042	7	142466771	A	C	0.4254	0	0.773	rs55833042	1	TRUE	PRSS3P1 (1.5 kb, near_gene/Upstream gene/MODIFIER); PRSS1 (5.8 kb); PRSS3P2 (11 kb); TRBV29-1 (18 kb); WBP1LP1 (20 kb); TRBJ2-1 (27 kb); TRBJ2-2 (27 kb); TRBJ2-2P (28 kb); TRBJ2-3 (28 kb); TRBJ2-4 (28 kb); TRBJ2-5 (28 kb); TRBJ2-6 (28 kb); TRBJ2-7 (28 kb); TRBC2 (32 kb); PGBD4P1 (36 kb); TRBV28 (38 kb); TRBV27 (43 kb); TRBV30 (43 kb); TRBVB (47 kb)	-0.279469	-0.209818	2.012	0.496371	0.772 Pancreatitis	C7orf34 | ENST00000390397 | ENST00000390401 | ENST00000390418 | ENST00000390419 | EPHB6 | PRSS1 | PRSS3P1 | PRSS3P2 | TRBV19 | TRBV21-1 | TRBV24-1 | TRBV27 | TRBV28 | TRBV29-1 | U66060.1-19 | U66060.1-23 | U66061.1-11 | unnamed		ACP vs. all controls	1.76305	1.61-1.9	28.4953	1.70155	1.49-1.9	14.6274	1.99681	1.75-2.3	24.5242
rs12534573	7	142469937	T	C	0.4	0	0.802	rs4726575	0.831035	FALSE	PRSS3P1 (0 kb, intron/Intron/MODIFIER | nc-RNA/Non coding transcript/MODIFIER | near_gene/Upstream gene/MODIFIER); PRSS3P2 (8.1 kb); PRSS1 (9 kb); WBP1LP1 (17 kb); TRBV29-1 (21 kb); TRBJ2-1 (24 kb); TRBJ2-2 (24 kb); TRBJ2-2P (24 kb); TRBJ2-3 (25 kb); TRBJ2-4 (25 kb); TRBJ2-5 (25 kb); TRBJ2-6 (25 kb); TRBJ2-7 (25 kb); TRBC2 (29 kb); PGBD4P1 (39 kb); TRBV30 (40 kb); TRBV28 (41 kb); TRBV27 (46 kb)	-0.058619	-0.17266	2.862	0.572264	0.904 Pancreatitis	C7orf34 | ENST00000390397 | ENST00000390401 | ENST00000390418 | ENST00000390419 | EPHB6 | PRSS1 | PRSS3P1 | PRSS3P2 | TRBV19 | TRBV21-1 | TRBV24-1 | TRBV27 | TRBV28 | TRBV29-1 | U66060.1-19 | U66060.1-23 | U66061.1-11 | unnamed		ACP vs. all controls	1.75871	1.61-1.9	28.4867	1.72652	1.52-2	15.4881	1.97824	1.75-2.2	24.3269
rs2367484	7	142473952	A	G	0.3977	0	0.792	rs4726575	0.831162	FALSE	PRSS3P1 (2.2 kb, near_gene/Downstream gene/MODIFIER); PRSS3P2 (4.1 kb, near_gene/Upstream gene/MODIFIER); WBP1LP1 (12 kb); PRSS1 (13 kb); TRBJ2-1 (20 kb); TRBJ2-2 (20 kb); TRBJ2-2P (20 kb); TRBJ2-3 (21 kb); TRBJ2-4 (21 kb); TRBJ2-5 (21 kb); TRBJ2-6 (21 kb); TRBJ2-7 (21 kb); TRBC2 (25 kb); TRBV29-1 (25 kb); TRBV30 (36 kb); PGBD4P1 (43 kb); TRBV28 (45 kb)	-0.405775	-0.178624	2.081	0.440866	0.889 Pancreatitis	C7orf34 | ENST00000390397 | ENST00000390401 | ENST00000390418 | ENST00000390419 | EPHB6 | PRSS1 | PRSS3P1 | PRSS3P2 | TRBV19 | TRBV21-1 | TRBV24-1 | TRBV27 | TRBV28 | TRBV29-1 | U66060.1-19 | U66060.1-23 | U66061.1-11 | unnamed		ACP vs. all controls	1.76866	1.61-2	28.4578	1.73671	1.54-2	15.5725	1.9996	1.75-2.3	24.694
rs4726581	7	142472439	T	C	0.3928	0	0.813	rs4726575	0.845055	FALSE	PRSS3P1 (0.64 kb, near_gene/Downstream gene/MODIFIER); PRSS3P2 (5.6 kb); PRSS1 (12 kb); WBP1LP1 (14 kb); TRBJ2-1 (22 kb); TRBJ2-2 (22 kb); TRBJ2-2P (22 kb); TRBJ2-3 (22 kb); TRBJ2-4 (22 kb); TRBJ2-5 (22 kb); TRBJ2-6 (22 kb); TRBJ2-7 (23 kb); TRBV29-1 (24 kb); TRBC2 (26 kb); TRBV30 (38 kb); PGBD4P1 (42 kb); TRBV28 (43 kb); TRBV27 (49 kb)	-0.699892	-0.265874	0.293	0.680821	0.9 Pancreatitis	C7orf34 | ENST00000390397 | ENST00000390401 | ENST00000390418 | ENST00000390419 | EPHB6 | PRSS1 | PRSS3P1 | PRSS3P2 | TRBV19 | TRBV21-1 | TRBV24-1 | TRBV27 | TRBV28 | TRBV29-1 | U66060.1-19 | U66060.1-23 | U66061.1-11 | unnamed		ACP vs. all controls	1.75623	1.61-1.9	28.3497	1.71821	1.52-2	15.2755	1.97981	1.75-2.2	24.5298
rs13229701	7	142473464	T	C	0.3968	0	0.792	rs4726575	0.82836	FALSE	PRSS3P1 (1.7 kb, near_gene/Downstream gene/MODIFIER); PRSS3P2 (4.6 kb, near_gene/Upstream gene/MODIFIER); PRSS1 (13 kb); WBP1LP1 (13 kb); TRBJ2-1 (21 kb); TRBJ2-2 (21 kb); TRBJ2-2P (21 kb); TRBJ2-3 (21 kb); TRBJ2-4 (21 kb); TRBJ2-5 (21 kb); TRBJ2-6 (21 kb); TRBJ2-7 (22 kb); TRBV29-1 (25 kb); TRBC2 (25 kb); TRBV30 (37 kb); PGBD4P1 (43 kb); TRBV28 (44 kb); TRBV27 (50 kb)	-0.339573	-0.208439	2.33	0.500976	0.883 Pancreatitis	C7orf34 | ENST00000390397 | ENST00000390401 | ENST00000390418 | ENST00000390419 | EPHB6 | PRSS1 | PRSS3P1 | PRSS3P2 | TRBV19 | TRBV21-1 | TRBV24-1 | TRBV27 | TRBV28 | TRBV29-1 | U66060.1-19 | U66060.1-23 | U66061.1-11 | unnamed		ACP vs. all controls	1.76056	1.61-1.9	28.1299	1.72087	1.52-2	15.1311	1.98373	1.75-2.3	24.223
rs11769872	7	142470290	C	T	0.393	0	0.813	rs4726575	0.845227	FALSE	PRSS3P1 (0 kb, intron/Intron/MODIFIER | nc-RNA/Non coding transcript/MODIFIER | near_gene/Upstream gene/MODIFIER); PRSS3P2 (7.8 kb); PRSS1 (9.4 kb); WBP1LP1 (16 kb); TRBV29-1 (22 kb); TRBJ2-1 (24 kb); TRBJ2-2 (24 kb); TRBJ2-2P (24 kb); TRBJ2-3 (24 kb); TRBJ2-4 (24 kb); TRBJ2-5 (25 kb); TRBJ2-6 (25 kb); TRBJ2-7 (25 kb); TRBC2 (28 kb); PGBD4P1 (40 kb); TRBV30 (40 kb); TRBV28 (41 kb); TRBV27 (47 kb)	-0.275786	-0.211088	2.099	0.454977	0.894 Pancreatitis	C7orf34 | ENST00000390397 | ENST00000390401 | ENST00000390418 | ENST00000390419 | EPHB6 | PRSS1 | PRSS3P1 | PRSS3P2 | TRBV19 | TRBV21-1 | TRBV24-1 | TRBV27 | TRBV28 | TRBV29-1 | U66060.1-19 | U66060.1-23 | U66061.1-11 | unnamed		ACP vs. all controls	1.75193	1.59-1.9	28.1111	1.7135	1.52-1.9	15.1744	1.97902	1.75-2.2	24.5025
rs4726585	7	142473038	T	G	0.3628	0	0.77	rs55833042	0.846571	FALSE	PRSS3P1 (1.2 kb, near_gene/Downstream gene/MODIFIER); PRSS3P2 (5 kb); PRSS1 (12 kb); WBP1LP1 (13 kb); TRBJ2-1 (21 kb); TRBJ2-2 (21 kb); TRBJ2-2P (21 kb); TRBJ2-3 (21 kb); TRBJ2-4 (22 kb); TRBJ2-5 (22 kb); TRBJ2-6 (22 kb); TRBJ2-7 (22 kb); TRBV29-1 (24 kb); TRBC2 (26 kb); TRBV30 (37 kb); PGBD4P1 (42 kb); TRBV28 (44 kb); TRBV27 (49 kb)	-0.389027	-0.216712	2.129	0.254456	0.775 Pancreatitis	C7orf34 | ENST00000390397 | ENST00000390401 | ENST00000390418 | ENST00000390419 | EPHB6 | PRSS1 | PRSS3P1 | PRSS3P2 | TRBV19 | TRBV24-1 | TRBV28 | TRBV29-1 | U66060.1-19 | U66060.1-23 | U66061.1-11 | unnamed		ACP vs. all controls	1.8035	1.64-1.99	28.0652	1.7691	1.55-2.01	15.4123	2.051	1.8-2.34	24.5826
rs4726586	7	142473040	T	A	0.3628	0	0.77	rs55833042	0.846554	FALSE	PRSS3P1 (1.2 kb, near_gene/Downstream gene/MODIFIER); PRSS3P2 (5 kb); PRSS1 (12 kb); WBP1LP1 (13 kb); TRBJ2-1 (21 kb); TRBJ2-2 (21 kb); TRBJ2-2P (21 kb); TRBJ2-3 (21 kb); TRBJ2-4 (22 kb); TRBJ2-5 (22 kb); TRBJ2-6 (22 kb); TRBJ2-7 (22 kb); TRBV29-1 (24 kb); TRBC2 (26 kb); TRBV30 (37 kb); PGBD4P1 (42 kb); TRBV28 (44 kb); TRBV27 (49 kb)	-0.676972	-0.254428	2.292	0.207271	0.775 Pancreatitis	C7orf34 | ENST00000390397 | ENST00000390401 | ENST00000390418 | ENST00000390419 | EPHB6 | PRSS1 | PRSS3P1 | PRSS3P2 | TRBV19 | TRBV24-1 | TRBV28 | TRBV29-1 | U66060.1-19 | U66060.1-23 | U66061.1-11 | unnamed		ACP vs. all controls	1.8035	1.64-1.99	28.0652	1.7691	1.55-2.01	15.4123	2.051	1.8-2.34	24.5826
MERGED_DEL_2_45446	7	142475629	TTTTAAAACACACATCTCTCTGACCAAACAGGTAGGTGAGATCTGACTTTAAAGGGGGGAAATTGGGATGAATTGGGGTATCAGGAATGAATCCCAAGTGTTTTTGTGTGGCGAATGGCATCCACATCCCAAAATATACTTGGAGATGGGGAAAAAAGCAGGAGAGGAGAAGGGTAAAAAAGGAGGACAAAGTGTCTGAAAGTCATTGAAAGCTTCTCTCATGGTTCTTTCTGGCTCTGGTTGCTTTGCCAAGGTCTTGAGTGCAGGCAGGGCTGGCTCTGGCTGGGAGCTGCTGCTCTGGAACATGGAAGAGTCACTTCACCTCCAGAAAGCTCATTTGATCATCTGTAAAATGGGCAAGCCCATAGGTGGTTGTGATGACAAAATGAAAAAAACTTT…	T	0.4099	0	0.776	rs4726575	0.803367	FALSE	PRSS3P2 (2.4 kb); PRSS3P1 (3.8 kb); WBP1LP1 (11 kb); PRSS1 (15 kb); TRBJ2-1 (18 kb); TRBJ2-2 (19 kb); TRBJ2-2P (19 kb); TRBJ2-3 (19 kb); TRBJ2-4 (19 kb); TRBJ2-5 (19 kb); TRBJ2-6 (19 kb); TRBJ2-7 (20 kb); TRBC2 (23 kb); TRBV29-1 (27 kb); TRBV30 (35 kb); PGBD4P1 (45 kb); TRBV28 (47 kb)			0		0.819 Pancreatitis	C7orf34 | ENST00000390397 | ENST00000390401 | ENST00000390418 | ENST00000390419 | EPHB6 | PRSS1 | PRSS3P1 | PRSS3P2 | TRBV19 | TRBV21-1 | TRBV24-1 | TRBV27 | TRBV28 | TRBV29-1 | U66060.1-19 | U66060.1-23 | U66061.1-11 | unnamed		ACP vs. all controls	1.7622	1.6-1.94	27.9929	1.7327	1.53-1.96	15.4033	1.9726	1.74-2.24	23.6983
chr7:142454023:D	7	142454023	A	AAG	0.4163	0	0.851	rs4726575	0.902941	FALSE	PRSS1 (3.3 kb, near_gene/Upstream gene/MODIFIER); TRBV29-1 (5.3 kb); PRSS3P1 (14 kb); PGBD4P1 (23 kb); PRSS3P2 (24 kb); TRBV28 (25 kb); TRBV27 (30 kb); WBP1LP1 (32 kb); TRBVB (34 kb); TRBJ2-1 (40 kb); TRBJ2-2 (40 kb); TRBJ2-2P (40 kb); TRBJ2-3 (41 kb); TRBJ2-4 (41 kb); TRBJ2-5 (41 kb); TRBJ2-6 (41 kb); TRBJ2-7 (41 kb); TRBC2 (45 kb)			0.423		0.666 Pancreatitis	C7orf34 | ENST00000390397 | ENST00000390401 | ENST00000390418 | ENST00000390419 | EPHB6 | PGBD4P1 | PRSS1 | PRSS3P1 | PRSS3P2 | TRBV19 | TRBV21-1 | TRBV24-1 | TRBV27 | TRBV28 | TRBV29-1 | TRBV7-8 | U66060.1-19 | U66060.1-23 | U66061.1-11 | unnamed		ACP vs. all controls	1.71644	1.56-1.9	27.836	1.62681	1.45-1.8	13.3967	1.95198	1.72-2.2	24.9846
rs13228878	7	142473466	A	G	0.3938	0	0.788	rs4726575	0.822003	FALSE	PRSS3P1 (1.7 kb, near_gene/Downstream gene/MODIFIER); PRSS3P2 (4.6 kb, near_gene/Upstream gene/MODIFIER); PRSS1 (13 kb); WBP1LP1 (13 kb); TRBJ2-1 (21 kb); TRBJ2-2 (21 kb); TRBJ2-2P (21 kb); TRBJ2-3 (21 kb); TRBJ2-4 (21 kb); TRBJ2-5 (21 kb); TRBJ2-6 (21 kb); TRBJ2-7 (22 kb); TRBV29-1 (25 kb); TRBC2 (25 kb); TRBV30 (37 kb); PGBD4P1 (43 kb); TRBV28 (44 kb); TRBV27 (50 kb)	-0.375544	-0.214466	1.913	0.324044	0.894 Pancreatitis	C7orf34 | ENST00000390397 | ENST00000390401 | ENST00000390418 | ENST00000390419 | EPHB6 | PRSS1 | PRSS3P1 | PRSS3P2 | TRBV19 | TRBV21-1 | TRBV24-1 | TRBV27 | TRBV28 | TRBV29-1 | U66060.1-19 | U66060.1-23 | U66061.1-11 | unnamed		ACP vs. all controls	1.7575	1.6-1.93	27.6273	1.726	1.52-1.96	15.1533	1.9848	1.75-2.25	24.1141
MERGED_DEL_2_45448	7	142475902	TGGCTCTGGCTGGGAGCTGCTGCTCTGGAACATGGAAGAGTCACTTCACCTCCAGAAAGCTCATTTGATCATCTGTAAAATGGGCAAGCCCATAGGTGGTTGTGATGACAAAATGAAAAAAACTTTCTTAACTTATATGAGTGACATGCTGTATAGTAAGTTACATGCTATATAGTAAGCACACAGAAATAACTCACTGTTATCATAAATGAAACACAGTGGATTAGTGAGCTAAGCACTAAATGGAAGCCAGAAAGATGTCTAGAGAAGTAGACAAAGAAATCTATAGTTCAGAATGAACAGTATCAAGAATGACATGTCCTCCAAATTGAGCTTGGGCAGCTGGATCTGAACCTATCCTACACATCTGAGTCTACAGTATGAGGTAACAGCCTCCAC…	T	0.4072	0	0.782	rs4726575	0.807655	FALSE	PRSS3P2 (2.2 kb); PRSS3P1 (4.1 kb); WBP1LP1 (11 kb); PRSS1 (15 kb); TRBJ2-1 (18 kb); TRBJ2-2 (18 kb); TRBJ2-2P (18 kb); TRBJ2-3 (19 kb); TRBJ2-4 (19 kb); TRBJ2-5 (19 kb); TRBJ2-6 (19 kb); TRBJ2-7 (19 kb); TRBC2 (23 kb); TRBV29-1 (27 kb); TRBV30 (34 kb); PGBD4P1 (45 kb); TRBV28 (47 kb)			0		0.824 Pancreatitis	C7orf34 | ENST00000390397 | ENST00000390401 | ENST00000390418 | ENST00000390419 | EPHB6 | PRSS1 | PRSS3P1 | PRSS3P2 | TRBV19 | TRBV21-1 | TRBV24-1 | TRBV27 | TRBV28 | TRBV29-1 | U66060.1-19 | U66060.1-23 | U66061.1-11 | unnamed		ACP vs. all controls	1.7523	1.59-1.93	27.5681	1.7202	1.52-1.95	15.1104	1.9541	1.72-2.21	23.2092
rs28706856	7	142467341	A	G	0.361	0	0.756	rs4726575	0.805723	FALSE	PRSS3P1 (0.92 kb, near_gene/Upstream gene/MODIFIER); PRSS1 (6.4 kb); PRSS3P2 (11 kb); TRBV29-1 (19 kb); WBP1LP1 (19 kb); TRBJ2-1 (27 kb); TRBJ2-2 (27 kb); TRBJ2-2P (27 kb); TRBJ2-3 (27 kb); TRBJ2-4 (27 kb); TRBJ2-5 (27 kb); TRBJ2-6 (28 kb); TRBJ2-7 (28 kb); TRBC2 (31 kb); PGBD4P1 (37 kb); TRBV28 (38 kb); TRBV30 (43 kb); TRBV27 (44 kb); TRBVB (48 kb)	-0.357933	-0.220445	0.296	0.451334	0.804 Pancreatitis	C7orf34 | ENST00000390397 | ENST00000390401 | ENST00000390418 | ENST00000390419 | EPHB6 | PRSS1 | PRSS3P1 | PRSS3P2 | TRBV19 | TRBV24-1 | TRBV28 | TRBV29-1 | U66060.1-19 | U66060.1-23 | U66061.1-11 | unnamed		ACP vs. all controls	1.7964	1.63-1.98	27.4906	1.7573	1.54-2	14.859	2.0035	1.76-2.28	23.1966
rs12837024	23	106154233	T	C	0.2976	0	0.938	rs7057398	0.930877	FALSE	MORC4 (0 kb, intron/Intron/MODIFIER); CLDN2 (0 kb, intron/Intron/MODIFIER)					0.825 Pancreatitis		CDIPT	ACP vs. all controls	2.2777	2-2.6	27.4477	2.43076	1.96-3	14.6995	2.24573	1.89-2.6	18.2839
rs13229600	7	142473437	G	C	0.3907	0	0.783	rs4726575	0.818506	FALSE	PRSS3P1 (1.6 kb, near_gene/Downstream gene/MODIFIER); PRSS3P2 (4.6 kb, near_gene/Upstream gene/MODIFIER); PRSS1 (13 kb); WBP1LP1 (13 kb); TRBJ2-1 (21 kb); TRBJ2-2 (21 kb); TRBJ2-2P (21 kb); TRBJ2-3 (21 kb); TRBJ2-4 (21 kb); TRBJ2-5 (21 kb); TRBJ2-6 (21 kb); TRBJ2-7 (22 kb); TRBV29-1 (25 kb); TRBC2 (25 kb); TRBV30 (37 kb); PGBD4P1 (43 kb); TRBV28 (44 kb); TRBV27 (50 kb)	-0.429542	-0.211102	0.229	0.21935	0.867 Pancreatitis	C7orf34 | ENST00000390397 | ENST00000390401 | ENST00000390418 | ENST00000390419 | EPHB6 | PRSS1 | PRSS3P1 | PRSS3P2 | TRBV19 | TRBV21-1 | TRBV24-1 | TRBV27 | TRBV28 | TRBV29-1 | U66060.1-19 | U66060.1-23 | U66061.1-11 | unnamed		ACP vs. all controls	1.7567	1.6-1.93	27.3644	1.7191	1.52-1.95	14.8555	1.9867	1.75-2.25	24.0343
rs56225909	7	142471344	A	G	0.3659	0	0.763	rs55833042	0.856307	FALSE	PRSS3P1 (0 kb, intron/Splice region/LOW | intron/Intron/MODIFIER | nc-RNA/Non coding transcript/MODIFIER); PRSS3P2 (6.7 kb); PRSS1 (10 kb); WBP1LP1 (15 kb); TRBV29-1 (23 kb); TRBJ2-1 (23 kb); TRBJ2-2 (23 kb); TRBJ2-2P (23 kb); TRBJ2-3 (23 kb); TRBJ2-4 (23 kb); TRBJ2-5 (23 kb); TRBJ2-6 (24 kb); TRBJ2-7 (24 kb); TRBC2 (27 kb); TRBV30 (39 kb); PGBD4P1 (41 kb); TRBV28 (42 kb); TRBV27 (48 kb)	0.0111923	-0.151305	2.953	0.49395	0.838 Pancreatitis	C7orf34 | ENST00000390397 | ENST00000390401 | ENST00000390418 | ENST00000390419 | EPHB6 | PRSS1 | PRSS3P1 | PRSS3P2 | TRBV19 | TRBV21-1 | TRBV24-1 | TRBV27 | TRBV28 | TRBV29-1 | U66060.1-19 | U66060.1-23 | U66061.1-11 | unnamed		ACP vs. all controls	1.77904	1.61-2	27.0317	1.71762	1.52-2	14.0176	2.02716	1.79-2.3	24.1667
rs34708921	7	142450555	C	T	0.4319	0	0.843	rs4726575	0.869678	FALSE	TRBV29-1 (1.8 kb, near_gene/Downstream gene/MODIFIER); PRSS1 (6.8 kb); PRSS3P1 (18 kb); PGBD4P1 (20 kb); TRBV28 (22 kb); TRBV27 (27 kb); PRSS3P2 (28 kb); TRBVB (31 kb); WBP1LP1 (36 kb); TRBJ2-1 (43 kb); TRBJ2-2 (44 kb); TRBJ2-2P (44 kb); TRBJ2-3 (44 kb); TRBJ2-4 (44 kb); TRBJ2-5 (44 kb); TRBJ2-6 (44 kb); TRBJ2-7 (45 kb); TRBV26 (47 kb); TRBC2 (48 kb)	-0.0288734	-0.168244	10.14	0.897809	0.643 Pancreatitis	C7orf34 | ENST00000390397 | ENST00000390401 | ENST00000390418 | ENST00000390419 | EPHB6 | PGBD4P1 | PRSS1 | PRSS3P1 | PRSS3P2 | TRBV19 | TRBV21-1 | TRBV24-1 | TRBV27 | TRBV28 | TRBV29-1 | TRBV7-8 | U66060.1-19 | U66060.1-23 | U66061.1-11 | unnamed		ACP vs. all controls	1.69549	1.54-1.9	26.965	1.59693	1.41-1.8	12.5687	1.95274	1.72-2.2	25.0127
rs12842188	23	106119671	C	T	0.3019	0	0.962	rs7057398	0.936609	FALSE	MORC4 (0 kb, intron/Intron/MODIFIER); TBC1D8B (0.3 kb, near_gene/Downstream gene/MODIFIER)					0.817 Pancreatitis		CDIPT | PDGFD	ACP vs. all controls	2.22302	1.92-2.6	26.6279	2.40893	1.96-2.9	14.7856	2.14933	1.82-2.6	17.0301
rs2734212	7	142475691	T	G	0.37	0	0.777	rs55833042	0.850218	FALSE	PRSS3P2 (2.4 kb, near_gene/Upstream gene/MODIFIER); PRSS3P1 (3.9 kb, near_gene/Downstream gene/MODIFIER); WBP1LP1 (11 kb); PRSS1 (15 kb); TRBJ2-1 (18 kb); TRBJ2-2 (19 kb); TRBJ2-2P (19 kb); TRBJ2-3 (19 kb); TRBJ2-4 (19 kb); TRBJ2-5 (19 kb); TRBJ2-6 (19 kb); TRBJ2-7 (19 kb); TRBC2 (23 kb); TRBV29-1 (27 kb); TRBV30 (35 kb); PGBD4P1 (45 kb); TRBV28 (47 kb)	-0.3772	-0.210017	2.273	0.19216	0.814 Pancreatitis	C7orf34 | ENST00000390397 | ENST00000390401 | ENST00000390418 | ENST00000390419 | EPHB6 | PRSS1 | PRSS3P1 | PRSS3P2 | TRBV19 | TRBV21-1 | TRBV24-1 | TRBV27 | TRBV28 | TRBV29-1 | U66060.1-19 | U66060.1-23 | U66061.1-11 | unnamed		ACP vs. all controls	1.7594	1.6-1.94	26.4433	1.7093	1.5-1.94	14.1417	1.9851	1.74-2.26	22.9395
rs12848637	23	106091939	T	A	0.2904	0	0.928	rs7057398	0.916349	FALSE	TBC1D8B (0 kb, intron/Intron/MODIFIER | near_gene/Upstream gene/MODIFIER); MORC4 (0 kb, intron/Intron/MODIFIER)					0.769 Pancreatitis		CDIPT | FGFBP2 | PDGFD	ACP vs. all controls	2.25654	1.96-2.6	26.1304	2.45135	2-3	14.4957	2.16263	1.82-2.6	16.4083
rs3752404	7	142470574	A	G	0.3636	0	0.764	rs55833042	0.854719	FALSE	PRSS3P1 (0 kb, nc-exon/Non coding transcript exon/MODIFIER | nc-RNA/Non coding transcript/MODIFIER); PRSS3P2 (7.5 kb); PRSS1 (9.6 kb); WBP1LP1 (16 kb); TRBV29-1 (22 kb); TRBJ2-1 (23 kb); TRBJ2-2 (24 kb); TRBJ2-2P (24 kb); TRBJ2-3 (24 kb); TRBJ2-4 (24 kb); TRBJ2-5 (24 kb); TRBJ2-6 (24 kb); TRBJ2-7 (25 kb); TRBC2 (28 kb); TRBV30 (40 kb); PGBD4P1 (40 kb); TRBV28 (42 kb); TRBV27 (47 kb)	0.649692	-0.0411238	2.946	0.314514	0.801 Pancreatitis	C7orf34 | ENST00000390397 | ENST00000390401 | ENST00000390418 | ENST00000390419 | EPHB6 | PRSS1 | PRSS3P1 | PRSS3P2 | TRBV19 | TRBV21-1 | TRBV24-1 | TRBV27 | TRBV28 | TRBV29-1 | U66060.1-19 | U66060.1-23 | U66061.1-11 | unnamed		ACP vs. all controls	1.7594	1.6-1.94	26.035	1.7364	1.52-1.98	14.472	1.9765	1.74-2.25	22.464
rs4726588	7	142473188	T	C	0.4439	0	0.739	rs55833042	0.845972	FALSE	PRSS3P1 (1.4 kb, near_gene/Downstream gene/MODIFIER); PRSS3P2 (4.9 kb, near_gene/Upstream gene/MODIFIER); PRSS1 (12 kb); WBP1LP1 (13 kb); TRBJ2-1 (21 kb); TRBJ2-2 (21 kb); TRBJ2-2P (21 kb); TRBJ2-3 (21 kb); TRBJ2-4 (21 kb); TRBJ2-5 (22 kb); TRBJ2-6 (22 kb); TRBJ2-7 (22 kb); TRBV29-1 (24 kb); TRBC2 (26 kb); TRBV30 (37 kb); PGBD4P1 (43 kb); TRBV28 (44 kb); TRBV27 (49 kb)	-0.341547	-0.196709	3.42	0.460639	0.734 Pancreatitis	C7orf34 | ENST00000390397 | ENST00000390401 | ENST00000390418 | ENST00000390419 | EPHB6 | PRSS1 | PRSS3P1 | PRSS3P2 | TRBV19 | TRBV24-1 | TRBV28 | TRBV29-1 | U66060.1-19 | U66060.1-23 | U66061.1-11 | unnamed		ACP vs. all controls	1.72384	1.56-1.9	25.8272	1.69205	1.49-1.9	14.044	1.9459	1.72-2.2	22.4549
rs4409525	23	106140325	A	G	0.3125	2	1	rs7057398	0.94991	FALSE	MORC4 (0 kb, intron/Intron/MODIFIER); RIPPLY1 (3 kb, near_gene/Downstream gene/MODIFIER); CLDN2 (3.1 kb, near_gene/Upstream gene/MODIFIER)					0.746 Pancreatitis		CDIPT | PDGFD	ACP vs. all controls	2.14996	1.89-2.4	25.792	2.32377	1.89-2.9	14.3811	2.10406	1.79-2.5	16.9576
rs12863896	23	106069028	T	G	0.2878	0	0.917	rs7057398	0.90943	FALSE	TBC1D8B (0 kb, intron/Intron/MODIFIER | near_gene/Downstream gene/MODIFIER); MORC4 (0 kb, intron/Intron/MODIFIER)					0.761 Pancreatitis		CDIPT | FGFBP2 | PDGFD	ACP vs. all controls	2.2491	1.96-2.6	25.5123	2.44141	1.96-3	14.123	2.15565	1.82-2.6	16.0011
rs12689287	23	106081003	A	G	0.2879	0	0.918	rs7057398	0.909518	FALSE	TBC1D8B (0 kb, intron/Intron/MODIFIER); MORC4 (0 kb, intron/Intron/MODIFIER)					0.761 Pancreatitis		CDIPT | PDGFD	ACP vs. all controls	2.24843	1.96-2.6	25.4941	2.44141	1.96-3	14.123	2.15502	1.82-2.6	15.9895
rs3757378	7	142455527	G	A	0.3344	0	0.786	rs4726575	0.849551	FALSE	PRSS1 (1.8 kb, near_gene/Upstream gene/MODIFIER); TRBV29-1 (6.8 kb); PRSS3P1 (13 kb); PRSS3P2 (23 kb); PGBD4P1 (25 kb); TRBV28 (27 kb); WBP1LP1 (31 kb); TRBV27 (32 kb); TRBVB (36 kb); TRBJ2-1 (39 kb); TRBJ2-2 (39 kb); TRBJ2-2P (39 kb); TRBJ2-3 (39 kb); TRBJ2-4 (39 kb); TRBJ2-5 (39 kb); TRBJ2-6 (39 kb); TRBJ2-7 (40 kb); TRBC2 (43 kb)	-0.326192	-0.217062	8.382	0.562652	0.708 Pancreatitis	C7orf34 | ENST00000390397 | ENST00000390401 | ENST00000390418 | ENST00000390419 | EPHB6 | PGBD4P1 | PRSS1 | PRSS3P1 | PRSS3P2 | TRBV19 | TRBV21-1 | TRBV24-1 | TRBV27 | TRBV28 | TRBV29-1 | U66060.1-19 | U66060.1-23 | U66061.1-11 | unnamed		ACP vs. all controls	1.7604	1.59-1.94	25.3926	1.6574	1.46-1.89	12.2922	1.9567	1.72-2.23	21.8309
rs3757377	7	142455538	C	T	0.3344	0	0.786	rs4726575	0.849527	FALSE	PRSS1 (1.8 kb, near_gene/Upstream gene/MODIFIER); TRBV29-1 (6.8 kb); PRSS3P1 (13 kb); PRSS3P2 (23 kb); PGBD4P1 (25 kb); TRBV28 (27 kb); WBP1LP1 (31 kb); TRBV27 (32 kb); TRBVB (36 kb); TRBJ2-1 (39 kb); TRBJ2-2 (39 kb); TRBJ2-2P (39 kb); TRBJ2-3 (39 kb); TRBJ2-4 (39 kb); TRBJ2-5 (39 kb); TRBJ2-6 (39 kb); TRBJ2-7 (40 kb); TRBC2 (43 kb)	-0.253615	-0.200104	7.907	0.399024	0.708 Pancreatitis	C7orf34 | ENST00000390397 | ENST00000390401 | ENST00000390418 | ENST00000390419 | EPHB6 | PGBD4P1 | PRSS1 | PRSS3P1 | PRSS3P2 | TRBV19 | TRBV21-1 | TRBV24-1 | TRBV27 | TRBV28 | TRBV29-1 | U66060.1-19 | U66060.1-23 | U66061.1-11 | unnamed		ACP vs. all controls	1.7603	1.59-1.94	25.3876	1.6573	1.46-1.89	12.2547	1.9566	1.72-2.23	21.8277
rs2011216	7	142457674	G	A	0.3611	0	0.772	rs4726575	0.813526	FALSE	PRSS1 (0 kb, intron/Intron/MODIFIER | nc-RNA/Non coding transcript/MODIFIER | near_gene/Upstream gene/MODIFIER); TRBV29-1 (8.9 kb); PRSS3P1 (11 kb); PRSS3P2 (20 kb); PGBD4P1 (27 kb); TRBV28 (29 kb); WBP1LP1 (29 kb); TRBV27 (34 kb); TRBJ2-1 (36 kb); TRBJ2-2 (37 kb); TRBJ2-2P (37 kb); TRBJ2-3 (37 kb); TRBJ2-4 (37 kb); TRBJ2-5 (37 kb); TRBJ2-6 (37 kb); TRBJ2-7 (37 kb); TRBVB (38 kb); TRBC2 (41 kb)	-0.577629	-0.138905	0.11	0.538381	0.801 Pancreatitis	C7orf34 | ENST00000390388 | ENST00000390397 | ENST00000390401 | ENST00000390418 | ENST00000390419 | EPHB6 | PRSS1 | PRSS3P1 | PRSS3P2 | TRBV19 | TRBV21-1 | TRBV24-1 | TRBV27 | TRBV28 | TRBV29-1 | U66060.1-19 | U66060.1-21 | U66060.1-23 | U66061.1-11 | unnamed		ACP vs. all controls	1.7397	1.58-1.92	25.337	1.7114	1.51-1.95	14.1212	1.938	1.71-2.2	21.7375
rs4726577	7	142462673	G	C	0.3677	0	0.769	rs55833042	0.84605	FALSE	PRSS1 (1.8 kb, near_gene/Downstream gene/MODIFIER); PRSS3P1 (5.6 kb); TRBV29-1 (14 kb); PRSS3P2 (15 kb); WBP1LP1 (24 kb); TRBJ2-1 (31 kb); TRBJ2-2 (32 kb); TRBJ2-2P (32 kb); TRBJ2-3 (32 kb); TRBJ2-4 (32 kb); PGBD4P1 (32 kb); TRBJ2-5 (32 kb); TRBJ2-6 (32 kb); TRBJ2-7 (32 kb); TRBV28 (34 kb); TRBC2 (36 kb); TRBV27 (39 kb); TRBVB (43 kb); TRBV30 (48 kb)	-0.97126	-0.0739026	0.008	0.227416	0.888 Pancreatitis	C7orf34 | ENST00000390397 | ENST00000390401 | ENST00000390418 | ENST00000390419 | EPHB6 | PRSS1 | PRSS3P1 | PRSS3P2 | TRBV19 | TRBV21-1 | TRBV24-1 | TRBV27 | TRBV28 | TRBV29-1 | U66060.1-19 | U66060.1-23 | U66061.1-11 | unnamed		ACP vs. all controls	1.73551	1.59-1.9	25.3215	1.69205	1.49-1.9	13.6016	1.95656	1.72-2.2	22.4087
rs6959895	7	142434960	C	T	0.4153	2	1	rs4726575	0.805691	FALSE	PGBD4P1 (4.4 kb, near_gene/Downstream gene/MODIFIER); TRBV28 (6 kb); TRBV27 (11 kb); TRBV29-1 (13 kb); TRBVB (15 kb); PRSS1 (22 kb); TRBV26 (31 kb); PRSS3P1 (33 kb); PRSS3P2 (43 kb); TRBVA (45 kb)	-0.338342	-0.216629	2.217	0.506694	0.586 Pancreatitis	C7orf34 | ENST00000390388 | ENST00000390397 | ENST00000390401 | ENST00000390418 | ENST00000390419 | EPHB6 | OR9A2 | PGBD4P1 | PRSS1 | PRSS3P1 | PRSS3P2 | RP5-894A10.2 | TRBV19 | TRBV21-1 | TRBV24-1 | TRBV27 | TRBV28 | TRBV29-1 | TRBV7-8 | U66060.1-19 | U66060.1-21 | U66060.1-23 | U66061.1-11 | unnamed		ACP vs. all controls	1.59363	1.47-1.7	25.1735	1.50466	1.35-1.7	11.4819	1.70358	1.54-1.9	19.7322
rs13230029	7	142467216	C	G	0.409	0	0.76	rs55833042	0.800465	FALSE	PRSS3P1 (1 kb, near_gene/Upstream gene/MODIFIER); PRSS1 (6.3 kb); PRSS3P2 (11 kb); TRBV29-1 (18 kb); WBP1LP1 (19 kb); TRBJ2-1 (27 kb); TRBJ2-2 (27 kb); TRBJ2-2P (27 kb); TRBJ2-3 (27 kb); TRBJ2-4 (27 kb); TRBJ2-5 (28 kb); TRBJ2-6 (28 kb); TRBJ2-7 (28 kb); TRBC2 (32 kb); PGBD4P1 (37 kb); TRBV28 (38 kb); TRBV30 (43 kb); TRBV27 (44 kb); TRBVB (47 kb)	-0.399225	-0.225574	0.662	0.173207	0.831 Pancreatitis	C7orf34 | ENST00000390397 | ENST00000390401 | ENST00000390418 | ENST00000390419 | EPHB6 | PRSS1 | PRSS3P1 | PRSS3P2 | TRBV19 | TRBV21-1 | TRBV24-1 | TRBV27 | TRBV28 | TRBV29-1 | U66060.1-19 | U66060.1-23 | U66061.1-11 | unnamed		ACP vs. all controls	1.71527	1.56-1.9	25.0713	1.63052	1.43-1.9	12.1336	2.01898	1.79-2.3	24.5413
rs6953502	7	142431349	T	C	0.4189	0	0.964	rs6953502	1	TRUE	PGBD4P1 (0.76 kb, near_gene/Downstream gene/MODIFIER); TRBV28 (2.4 kb, near_gene/Downstream gene/MODIFIER); TRBV27 (7.7 kb); TRBVB (12 kb); TRBV29-1 (17 kb); PRSS1 (26 kb); TRBV26 (27 kb); PRSS3P1 (37 kb); TRBVA (42 kb); PRSS3P2 (47 kb)	-0.297465	-0.203885	3.043	0.497387	0.587 Pancreatitis	C7orf34 | ENST00000390388 | ENST00000390397 | ENST00000390401 | ENST00000390418 | ENST00000390419 | EPHB6 | OR9A2 | PGBD4P1 | PRSS1 | PRSS3P1 | PRSS3P2 | RP5-894A10.2 | TRBV19 | TRBV21-1 | TRBV24-1 | TRBV27 | TRBV28 | TRBV29-1 | TRBV7-8 | U66060.1-19 | U66060.1-21 | U66060.1-23 | U66061.1-11 | unnamed		ACP vs. all controls	1.59847	1.47-1.7	24.7995	1.49388	1.33-1.7	10.8503	1.71174	1.54-1.9	19.462
rs4726574	7	142433751	T	C	0.4168	0	0.984	rs4726575	0.804563	FALSE	PGBD4P1 (3.2 kb, near_gene/Downstream gene/MODIFIER); TRBV28 (4.8 kb, near_gene/Downstream gene/MODIFIER); TRBV27 (10 kb); TRBVB (14 kb); TRBV29-1 (14 kb); PRSS1 (24 kb); TRBV26 (30 kb); PRSS3P1 (35 kb); TRBVA (44 kb); PRSS3P2 (44 kb)	-0.38383	-0.226394	2.039	0.245254	0.586 Pancreatitis	C7orf34 | ENST00000390388 | ENST00000390397 | ENST00000390401 | ENST00000390418 | ENST00000390419 | EPHB6 | OR9A2 | PGBD4P1 | PRSS1 | PRSS3P1 | PRSS3P2 | RP5-894A10.2 | TRBV19 | TRBV21-1 | TRBV24-1 | TRBV27 | TRBV28 | TRBV29-1 | TRBV7-8 | U66060.1-19 | U66060.1-21 | U66060.1-23 | U66061.1-11 | unnamed		ACP vs. all controls	1.59109	1.47-1.7	24.6657	1.49298	1.33-1.7	10.9652	1.70882	1.54-1.9	19.6772
rs11770572	7	142470364	C	T	0.4434	0	0.749	rs55833042	0.822332	FALSE	PRSS3P1 (0 kb, intron/Intron/MODIFIER | nc-RNA/Non coding transcript/MODIFIER | near_gene/Upstream gene/MODIFIER); PRSS3P2 (7.7 kb); PRSS1 (9.4 kb); WBP1LP1 (16 kb); TRBV29-1 (22 kb); TRBJ2-1 (24 kb); TRBJ2-2 (24 kb); TRBJ2-2P (24 kb); TRBJ2-3 (24 kb); TRBJ2-4 (24 kb); TRBJ2-5 (24 kb); TRBJ2-6 (25 kb); TRBJ2-7 (25 kb); TRBC2 (28 kb); PGBD4P1 (40 kb); TRBV30 (40 kb); TRBV28 (41 kb); TRBV27 (47 kb)	-0.301272	-0.217239	1.17	0.447616	0.726 Pancreatitis	C7orf34 | ENST00000390397 | ENST00000390401 | ENST00000390418 | ENST00000390419 | EPHB6 | PRSS1 | PRSS3P1 | PRSS3P2 | TRBV19 | TRBV24-1 | TRBV28 | TRBV29-1 | U66060.1-19 | U66060.1-23 | U66061.1-11 | unnamed		ACP vs. all controls	1.68748	1.54-1.9	24.2034	1.63479	1.45-1.9	12.4722	1.88324	1.67-2.1	20.629
rs62470637	7	142433330	G	T	0.4208	0	0.979	rs6953502	0.98335	FALSE	PGBD4P1 (2.7 kb, near_gene/Downstream gene/MODIFIER); TRBV28 (4.3 kb, near_gene/Downstream gene/MODIFIER); TRBV27 (9.6 kb); TRBVB (14 kb); TRBV29-1 (15 kb); PRSS1 (24 kb); TRBV26 (29 kb); PRSS3P1 (35 kb); TRBVA (44 kb); PRSS3P2 (45 kb)	-0.66608	-0.265572	0.129	0.415428	0.576 Pancreatitis	C7orf34 | ENST00000390388 | ENST00000390397 | ENST00000390401 | ENST00000390418 | ENST00000390419 | EPHB6 | OR9A2 | PGBD4P1 | PRSS1 | PRSS3P1 | PRSS3P2 | RP5-894A10.2 | TRBV19 | TRBV21-1 | TRBV24-1 | TRBV27 | TRBV28 | TRBV29-1 | TRBV7-8 | U66060.1-19 | U66060.1-21 | U66060.1-23 | U66061.1-11 | unnamed		ACP vs. all controls	1.58278	1.45-1.7	24.1328	1.49321	1.33-1.7	10.8999	1.70999	1.54-1.9	19.5905
rs148655558	23	106011585	G	T	0.2778	0	0.892	rs148655558	1	TRUE	RNF128 (0 kb, intron/Intron/MODIFIER)					0.654 Pancreatitis		CDIPT | PDGFD	ACP vs. all controls	2.21905	1.92-2.6	23.9306	2.44982	1.96-3	13.652	2.14556	1.79-2.6	15.3548
rs7877190	23	106046657	T	G	0.2771	0	0.905	rs148655558	0.992898	FALSE	TBC1D8B (0 kb, intron/Intron/MODIFIER)					0.661 Pancreatitis		CDIPT | PDGFD	ACP vs. all controls	2.19219	1.89-2.5	23.4776	2.40818	1.92-3	13.2988	2.11693	1.79-2.5	14.9723
rs4726576	7	142457132	C	A	0.3431	0	0.744	rs55833042	0.802244	FALSE	PRSS1 (0.19 kb, near_gene/Upstream gene/MODIFIER); TRBV29-1 (8.4 kb); PRSS3P1 (11 kb); PRSS3P2 (21 kb); PGBD4P1 (27 kb); TRBV28 (28 kb); WBP1LP1 (29 kb); TRBV27 (33 kb); TRBJ2-1 (37 kb); TRBJ2-2 (37 kb); TRBJ2-2P (37 kb); TRBVB (37 kb); TRBJ2-3 (37 kb); TRBJ2-4 (38 kb); TRBJ2-5 (38 kb); TRBJ2-6 (38 kb); TRBJ2-7 (38 kb); TRBC2 (42 kb)	-0.578019	-0.243904	0.386	0.588883	0.812 Pancreatitis	C7orf34 | ENST00000390397 | ENST00000390401 | ENST00000390418 | ENST00000390419 | EPHB6 | PRSS1 | PRSS3P1 | PRSS3P2 | TRBV19 | TRBV21-1 | TRBV24-1 | TRBV27 | TRBV28 | TRBV29-1 | U66060.1-19 | U66060.1-23 | U66061.1-11 | unnamed		ACP vs. all controls	1.72682	1.56-1.9	23.2194	1.70416	1.49-2	13.0353	1.90549	1.67-2.2	19.5791
rs78907924	7	142485029	A	G	0.1995	0	0.667	rs78907924	1	TRUE	WBP1LP1 (1.4 kb, near_gene/Downstream gene/MODIFIER); PRSS3P2 (2.6 kb, near_gene/Downstream gene/MODIFIER); TRBJ2-1 (9 kb); TRBJ2-2 (9.2 kb); TRBJ2-2P (9.4 kb); TRBJ2-3 (9.5 kb); TRBJ2-4 (9.7 kb); TRBJ2-5 (9.8 kb); TRBJ2-6 (9.9 kb); TRBJ2-7 (10 kb); PRSS3P1 (13 kb); TRBC2 (14 kb); PRSS1 (24 kb); TRBV30 (25 kb); TRBV29-1 (36 kb)	-0.368081	-0.222322	7.545	0.520694	0.459 Pancreatitis	C7orf34 | ENST00000390397 | ENST00000390401 | ENST00000390418 | ENST00000390419 | EPHB6 | PRSS1 | PRSS3P1 | PRSS3P2 | TRBV19 | TRBV24-1 | TRBV28 | TRBV29-1 | U66060.1-19 | U66060.1-23 | U66061.1-11 | unnamed		ACP vs. all controls	2.03915	1.79-2.3	22.7913	2.07684	1.75-2.4	14.7062	2.21484	1.85-2.6	17.847
rs73740328	7	142484699	A	C	0.2088	0	0.656	rs78907924	0.920102	FALSE	WBP1LP1 (1.8 kb, near_gene/Downstream gene/MODIFIER); PRSS3P2 (2.3 kb, near_gene/Downstream gene/MODIFIER); TRBJ2-1 (9.3 kb); TRBJ2-2 (9.5 kb); TRBJ2-2P (9.7 kb); TRBJ2-3 (9.8 kb); TRBJ2-4 (10 kb); TRBJ2-5 (10 kb); TRBJ2-6 (10 kb); TRBJ2-7 (10 kb); PRSS3P1 (13 kb); TRBC2 (14 kb); PRSS1 (24 kb); TRBV30 (26 kb); TRBV29-1 (36 kb)	-0.268685	-0.182617	10.01	0.716652	0.453 Pancreatitis	C7orf34 | ENST00000390397 | ENST00000390401 | ENST00000390418 | ENST00000390419 | EPHB6 | PRSS1 | PRSS3P1 | PRSS3P2 | TRBV19 | TRBV24-1 | TRBV28 | TRBV29-1 | U66060.1-19 | U66060.1-23 | U66061.1-11 | unnamed		ACP vs. all controls	2.01126	1.75-2.3	22.593	2.02224	1.69-2.4	13.8595	2.22173	1.89-2.6	18.4219
rs73247958	23	106027088	A	G	0.2623	0	0.851	rs148655558	0.967097	FALSE	RNF128 (0 kb, intron/Intron/MODIFIER)					0.626 Pancreatitis		CDIPT | PDGFD	ACP vs. all controls	2.233	1.92-2.6	22.3799	2.46911	1.96-3.1	12.7334	2.15882	1.79-2.6	14.3635
rs58854468	7	142481590	T	C	0.2471	0	0.657	rs58854468	1	TRUE	PRSS3P2 (0 kb, intron/Intron/MODIFIER | nc-RNA/Non coding transcript/MODIFIER | near_gene/Downstream gene/MODIFIER); WBP1LP1 (4.9 kb, near_gene/Downstream gene/MODIFIER); PRSS3P1 (9.8 kb); TRBJ2-1 (12 kb); TRBJ2-2 (13 kb); TRBJ2-2P (13 kb); TRBJ2-3 (13 kb); TRBJ2-4 (13 kb); TRBJ2-5 (13 kb); TRBJ2-6 (13 kb); TRBJ2-7 (14 kb); TRBC2 (17 kb); PRSS1 (21 kb); TRBV30 (29 kb); TRBV29-1 (33 kb)	0.0297804	-0.163004	10.62	0.50316	0.446 Pancreatitis	C7orf34 | ENST00000390397 | ENST00000390401 | ENST00000390418 | ENST00000390419 | EPHB6 | PRSS1 | PRSS3P1 | PRSS3P2 | TRBV19 | TRBV24-1 | TRBV28 | TRBV29-1 | U66060.1-19 | U66060.1-23 | U66061.1-11 | unnamed		ACP vs. all controls	1.90767	1.69-2.2	22.3699	1.95733	1.67-2.3	14.3749	2.0404	1.75-2.4	16.9364
rs113599517	23	106052981	A	G	0.2647	0	0.872	rs148655558	0.968565	FALSE	TBC1D8B (0 kb, intron/Intron/MODIFIER); MORC4 (4.1 kb, near_gene/Downstream gene/MODIFIER)					0.625 Pancreatitis		CDIPT | PDGFD	ACP vs. all controls	2.20523	1.89-2.6	22.2702	2.42773	1.92-3	12.655	2.10284	1.75-2.5	13.8927
rs186347102	7	142477250	G	A	0.2144	0	0.651	rs78907924	0.876399	FALSE	PRSS3P2 (0.81 kb, near_gene/Upstream gene/MODIFIER); PRSS3P1 (5.5 kb); WBP1LP1 (9.2 kb); PRSS1 (16 kb); TRBJ2-1 (17 kb); TRBJ2-2 (17 kb); TRBJ2-2P (17 kb); TRBJ2-3 (17 kb); TRBJ2-4 (17 kb); TRBJ2-5 (18 kb); TRBJ2-6 (18 kb); TRBJ2-7 (18 kb); TRBC2 (21 kb); TRBV29-1 (29 kb); TRBV30 (33 kb); PGBD4P1 (47 kb); TRBV28 (48 kb)	-0.323104	-0.214811	6.338	0.538617	0.45 Pancreatitis	C7orf34 | ENST00000390397 | ENST00000390401 | ENST00000390418 | ENST00000390419 | EPHB6 | PRSS1 | PRSS3P1 | PRSS3P2 | TRBV19 | TRBV24-1 | TRBV28 | TRBV29-1 | U66060.1-19 | U66060.1-23 | U66061.1-11 | unnamed		ACP vs. all controls	1.986	1.75-2.26	22.2638	2.0163	1.71-2.38	14.1482	2.2399	1.9-2.65	19.0783
rs61369541	7	142477130	A	T	0.2196	0	0.631	rs78907924	0.880309	FALSE	PRSS3P2 (0.93 kb, near_gene/Upstream gene/MODIFIER); PRSS3P1 (5.3 kb); WBP1LP1 (9.3 kb); PRSS1 (16 kb); TRBJ2-1 (17 kb); TRBJ2-2 (17 kb); TRBJ2-2P (17 kb); TRBJ2-3 (17 kb); TRBJ2-4 (18 kb); TRBJ2-5 (18 kb); TRBJ2-6 (18 kb); TRBJ2-7 (18 kb); TRBC2 (22 kb); TRBV29-1 (28 kb); TRBV30 (33 kb); PGBD4P1 (47 kb); TRBV28 (48 kb)	-0.0788032	-0.180068	10.94	0.548242	0.457 Pancreatitis	C7orf34 | ENST00000390397 | ENST00000390401 | ENST00000390418 | ENST00000390419 | EPHB6 | PRSS1 | PRSS3P1 | PRSS3P2 | TRBV19 | TRBV24-1 | TRBV28 | TRBV29-1 | U66060.1-19 | U66060.1-23 | U66061.1-11 | unnamed		ACP vs. all controls	1.9984	1.75-2.3	22.1963	2.02675	1.72-2.4	13.912	2.2119	1.85-2.6	18.0664
rs116231553	7	142477516	G	C	0.2088	0	0.663	rs78907924	0.940109	FALSE	PRSS3P2 (0.55 kb, near_gene/Upstream gene/MODIFIER); PRSS3P1 (5.7 kb); WBP1LP1 (8.9 kb); TRBJ2-1 (17 kb); PRSS1 (17 kb); TRBJ2-2 (17 kb); TRBJ2-2P (17 kb); TRBJ2-3 (17 kb); TRBJ2-4 (17 kb); TRBJ2-5 (17 kb); TRBJ2-6 (17 kb); TRBJ2-7 (18 kb); TRBC2 (21 kb); TRBV29-1 (29 kb); TRBV30 (33 kb); PGBD4P1 (47 kb); TRBV28 (49 kb)	-0.216648	-0.199169	7.34	0.577797	0.476 Pancreatitis	C7orf34 | ENST00000390397 | ENST00000390401 | ENST00000390418 | ENST00000390419 | EPHB6 | PRSS1 | PRSS3P1 | PRSS3P2 | TRBV19 | TRBV24-1 | TRBV28 | TRBV29-1 | U66060.1-19 | U66060.1-23 | U66061.1-11 | unnamed		ACP vs. all controls	1.98531	1.75-2.3	22.0481	2.0429	1.72-2.4	14.5553	2.1901	1.85-2.6	17.8752
rs4726580	7	142470066	C	T	0.4779	0	0.683	rs4726580	1	TRUE	PRSS3P1 (0 kb, intron/Intron/MODIFIER | nc-RNA/Non coding transcript/MODIFIER | near_gene/Upstream gene/MODIFIER); PRSS3P2 (8 kb); PRSS1 (9.1 kb); WBP1LP1 (16 kb); TRBV29-1 (21 kb); TRBJ2-1 (24 kb); TRBJ2-2 (24 kb); TRBJ2-2P (24 kb); TRBJ2-3 (24 kb); TRBJ2-4 (25 kb); TRBJ2-5 (25 kb); TRBJ2-6 (25 kb); TRBJ2-7 (25 kb); TRBC2 (29 kb); PGBD4P1 (39 kb); TRBV30 (40 kb); TRBV28 (41 kb); TRBV27 (46 kb)	-0.384049	-0.229651	1.106	0.645732	0.536 Pancreatitis	C7orf34 | ENST00000390397 | ENST00000390401 | ENST00000390418 | ENST00000390419 | EPHB6 | PRSS1 | PRSS3P1 | PRSS3P2 | TRBV19 | TRBV24-1 | TRBV28 | TRBV29-1 | U66060.1-19 | U66060.1-23 | U66061.1-11 | unnamed		ACP vs. all controls	1.67112	1.52-1.9	22.0008	1.61655	1.43-1.9	11.243	1.91424	1.67-2.2	19.7338
rs2734221	7	142487346	G	A	0.455	0	0.993	rs2734221	1	TRUE	WBP1LP1 (0 kb, nc-exon/Non coding transcript exon/MODIFIER | nc-RNA/Non coding transcript/MODIFIER); PRSS3P2 (4.9 kb, near_gene/Downstream gene/MODIFIER); TRBJ2-1 (6.7 kb); TRBJ2-2 (6.9 kb); TRBJ2-2P (7 kb); TRBJ2-3 (7.2 kb); TRBJ2-4 (7.3 kb); TRBJ2-5 (7.5 kb); TRBJ2-6 (7.6 kb); TRBJ2-7 (7.8 kb); TRBC2 (11 kb); PRSS3P1 (16 kb); TRBV30 (23 kb); PRSS1 (26 kb); TRBV29-1 (39 kb)	-0.449079	-0.231193	3.961	0.565541	0.69 Pancreatitis	C7orf34 | ENST00000390388 | ENST00000390397 | ENST00000390401 | ENST00000390418 | ENST00000390419 | EPHB6 | PRSS1 | PRSS3P1 | PRSS3P2 | TRBV19 | TRBV21-1 | TRBV24-1 | TRBV28 | TRBV29-1 | U66060.1-19 | U66060.1-21 | U66060.1-23 | U66061.1-11 | unnamed		ACP vs. all controls	1.52882	1.41-1.7	21.8341	1.53374	1.37-1.7	12.9454	1.61525	1.45-1.8	16.6551
rs73247960	23	106044726	T	C	0.2733	0	0.89	rs148655558	0.957304	FALSE	TBC1D8B (1.2 kb, near_gene/Upstream gene/MODIFIER); RNF128 (4.5 kb, near_gene/Downstream gene/MODIFIER)					0.555 Pancreatitis		CDIPT | PDGFD	ACP vs. all controls	2.15186	1.85-2.5	21.7305	2.37124	1.89-2.9	12.4358	2.05783	1.72-2.4	13.578
rs3857776	7	142459290	T	C	0.352	0	0.731	rs3857776	1	TRUE	PRSS1 (0 kb, nc-exon/Non coding transcript exon/MODIFIER | intron/Intron/MODIFIER | nc-RNA/Non coding transcript/MODIFIER | near_gene/Downstream gene/MODIFIER); PRSS3P1 (9 kb); TRBV29-1 (11 kb); PRSS3P2 (19 kb); WBP1LP1 (27 kb); PGBD4P1 (29 kb); TRBV28 (30 kb); TRBJ2-1 (35 kb); TRBJ2-2 (35 kb); TRBJ2-2P (35 kb); TRBJ2-3 (35 kb); TRBJ2-4 (35 kb); TRBJ2-5 (36 kb); TRBV27 (36 kb); TRBJ2-6 (36 kb); T…	-0.294947	-0.212717	2.986	0.365574	0.787 Pancreatitis	C7orf34 | ENST00000390397 | ENST00000390401 | ENST00000390418 | ENST00000390419 | EPHB6 | PRSS1 | PRSS3P1 | PRSS3P2 | TRBV19 | TRBV21-1 | TRBV24-1 | TRBV27 | TRBV28 | TRBV29-1 | U66060.1-19 | U66060.1-23 | U66061.1-11 | unnamed		ACP vs. all controls	1.69319	1.54-1.9	21.6405	1.65893	1.45-1.9	11.893	1.87406	1.64-2.1	18.3638
rs73742452	7	142481007	G	A	0.2046	0	0.664	rs78907924	0.940196	FALSE	PRSS3P2 (0 kb, intron/Intron/MODIFIER | nc-RNA/Non coding transcript/MODIFIER | near_gene/Upstream gene/MODIFIER | near_gene/Downstream gene/MODIFIER); WBP1LP1 (5.4 kb); PRSS3P1 (9.2 kb); TRBJ2-1 (13 kb); TRBJ2-2 (13 kb); TRBJ2-2P (13 kb); TRBJ2-3 (14 kb); TRBJ2-4 (14 kb); TRBJ2-5 (14 kb); TRBJ2-6 (14 kb); TRBJ2-7 (14 kb); TRBC2 (18 kb); PRSS1 (20 kb); TRBV30 (29 kb); TRBV29-1 (32 kb)	-0.19554	-0.183471	6.565	0.235861	0.479 Pancreatitis	C7orf34 | ENST00000390397 | ENST00000390401 | ENST00000390418 | ENST00000390419 | EPHB6 | PRSS1 | PRSS3P1 | PRSS3P2 | TRBV19 | TRBV24-1 | TRBV28 | TRBV29-1 | U66060.1-19 | U66060.1-23 | U66061.1-11 | unnamed		ACP vs. all controls	1.97981	1.72-2.3	21.5621	2.01572	1.69-2.4	13.8299	2.18436	1.85-2.6	17.5267
rs545634	1	15770102	A	G	0.1163	0	0.95	rs545634	1	TRUE	CTRC (0 kb, intron/Intron/MODIFIER | nc-RNA/Non coding transcript/MODIFIER | near_gene/Downstream gene/MODIFIER); CELA2A (13 kb); EFHD2 (13 kb); CELA2B (22 kb); FHAD1 (43 kb); CASP9 (47 kb)	-0.241362	-0.223507	2.949	0.505862	NA	AGMAT | CASP9 | CTRC | DNAJC16 | PLEKHM2 | RSC1A1		ACP vs. all controls	1.83453	1.64-2	21.5556	1.69463	1.45-2	9.0052	1.97472	1.67-2.3	13.7252
rs115112396	7	142477601	T	C	0.2342	0	0.631	rs78907924	0.863429	FALSE	PRSS3P2 (0.46 kb, near_gene/Upstream gene/MODIFIER); PRSS3P1 (5.8 kb); WBP1LP1 (8.8 kb); TRBJ2-1 (16 kb); TRBJ2-2 (17 kb); PRSS1 (17 kb); TRBJ2-2P (17 kb); TRBJ2-3 (17 kb); TRBJ2-4 (17 kb); TRBJ2-5 (17 kb); TRBJ2-6 (17 kb); TRBJ2-7 (18 kb); TRBC2 (21 kb); TRBV29-1 (29 kb); TRBV30 (33 kb); PGBD4P1 (47 kb); TRBV28 (49 kb)	-0.163843	-0.194336	11.29	0.771681	0.432 Pancreatitis	C7orf34 | ENST00000390397 | ENST00000390401 | ENST00000390418 | ENST00000390419 | EPHB6 | PRSS1 | PRSS3P1 | PRSS3P2 | TRBV19 | TRBV24-1 | TRBV28 | TRBV29-1 | U66060.1-19 | U66060.1-23 | U66061.1-11 | unnamed		ACP vs. all controls	1.92864	1.69-2.2	21.5326	2.00723	1.69-2.4	14.4527	2.15239	1.82-2.6	17.8351
rs497078	1	15767036	T	C	0.1225	0	0.928	rs545634	0.970447	FALSE	CTRC (0 kb, exon/Synonymous/LOW | nc-exon/Non coding transcript exon/MODIFIER | intron/Intron/MODIFIER | nc-RNA/Non coding transcript/MODIFIER); EFHD2 (10 kb); CELA2A (16 kb); CELA2B (25 kb); FHAD1 (40 kb)	-0.297854	0.0258013	11.46	0.782499	NA	AGMAT | CASP9 | CTRC | DNAJC16 | PLEKHM2 | RSC1A1		ACP vs. all controls	1.8205	1.61-2	21.4521	1.66334	1.43-2	8.60082	1.96078	1.67-2.3	13.7897
rs182460722	7	142477187	T	A	0.2109	0	0.658	rs78907924	0.847913	FALSE	PRSS3P2 (0.88 kb, near_gene/Upstream gene/MODIFIER); PRSS3P1 (5.4 kb); WBP1LP1 (9.3 kb); PRSS1 (16 kb); TRBJ2-1 (17 kb); TRBJ2-2 (17 kb); TRBJ2-2P (17 kb); TRBJ2-3 (17 kb); TRBJ2-4 (17 kb); TRBJ2-5 (18 kb); TRBJ2-6 (18 kb); TRBJ2-7 (18 kb); TRBC2 (22 kb); TRBV29-1 (28 kb); TRBV30 (33 kb); PGBD4P1 (47 kb); TRBV28 (48 kb)	-0.371664	-0.223464	7.748	0.265291	0.473 Pancreatitis	C7orf34 | ENST00000390397 | ENST00000390401 | ENST00000390418 | ENST00000390419 | EPHB6 | PRSS1 | PRSS3P1 | PRSS3P2 | TRBV19 | TRBV24-1 | TRBV28 | TRBV29-1 | U66060.1-19 | U66060.1-23 | U66061.1-11 | unnamed		ACP vs. all controls	1.9568	1.72-2.23	21.3505	2.011	1.7-2.38	14.0791	2.1158	1.79-2.5	16.6277
rs181850376	7	142482596	C	G	0.1911	0	0.66	rs78907924	0.871268	FALSE	PRSS3P2 (0.18 kb, near_gene/Downstream gene/MODIFIER); WBP1LP1 (3.9 kb, near_gene/Downstream gene/MODIFIER); PRSS3P1 (11 kb); TRBJ2-1 (11 kb); TRBJ2-2 (12 kb); TRBJ2-2P (12 kb); TRBJ2-3 (12 kb); TRBJ2-4 (12 kb); TRBJ2-5 (12 kb); TRBJ2-6 (12 kb); TRBJ2-7 (13 kb); TRBC2 (16 kb); PRSS1 (22 kb); TRBV30 (28 kb); TRBV29-1 (34 kb)	-0.760451	-0.278765	0.454	0.0885693	0.458 Pancreatitis	C7orf34 | ENST00000390397 | ENST00000390401 | ENST00000390418 | ENST00000390419 | EPHB6 | PRSS1 | PRSS3P1 | PRSS3P2 | TRBV19 | TRBV24-1 | TRBV28 | TRBV29-1 | U66060.1-19 | U66060.1-23 | U66061.1-11 | unnamed		ACP vs. all controls	2.0208	1.77-2.31	21.3177	2.0268	1.7-2.41	13.1599	2.242	1.88-2.67	17.7448
rs115513889	7	142484676	A	C	0.2112	0	0.646	rs78907924	0.90117	FALSE	WBP1LP1 (1.8 kb, near_gene/Downstream gene/MODIFIER); PRSS3P2 (2.3 kb, near_gene/Downstream gene/MODIFIER); TRBJ2-1 (9.4 kb); TRBJ2-2 (9.6 kb); TRBJ2-2P (9.7 kb); TRBJ2-3 (9.9 kb); TRBJ2-4 (10 kb); TRBJ2-5 (10 kb); TRBJ2-6 (10 kb); TRBJ2-7 (10 kb); PRSS3P1 (13 kb); TRBC2 (14 kb); PRSS1 (24 kb); TRBV30 (26 kb); TRBV29-1 (36 kb)	-0.314407	-0.190415	8.922	0.638984	0.413 Pancreatitis	C7orf34 | ENST00000390397 | ENST00000390401 | ENST00000390418 | ENST00000390419 | EPHB6 | PRSS1 | PRSS3P1 | PRSS3P2 | TRBV19 | TRBV24-1 | TRBV28 | TRBV29-1 | U66060.1-19 | U66060.1-23 | U66061.1-11 | unnamed		ACP vs. all controls	1.96271	1.72-2.2	21.2234	2.00562	1.69-2.4	13.5545	2.17486	1.85-2.6	17.4564
rs35031873	7	142466454	C	A	0.4289	0	0.663	rs35031873	1	TRUE	PRSS3P1 (1.8 kb, near_gene/Upstream gene/MODIFIER); PRSS1 (5.5 kb); PRSS3P2 (12 kb); TRBV29-1 (18 kb); WBP1LP1 (20 kb); TRBJ2-1 (28 kb); TRBJ2-2 (28 kb); TRBJ2-2P (28 kb); TRBJ2-3 (28 kb); TRBJ2-4 (28 kb); TRBJ2-5 (28 kb); TRBJ2-6 (28 kb); TRBJ2-7 (29 kb); TRBC2 (32 kb); PGBD4P1 (36 kb); TRBV28 (37 kb); TRBV27 (43 kb); TRBV30 (44 kb); TRBVB (47 kb)	0.112307	-0.122435	3.318	0.697468	0.466 Pancreatitis	C7orf34 | ENST00000390397 | ENST00000390401 | ENST00000390418 | ENST00000390419 | EPHB6 | PRSS1 | PRSS3P1 | PRSS3P2 | TRBV19 | TRBV24-1 | TRBV28 | TRBV29-1 | U66060.1-19 | U66060.1-23 | U66061.1-11 | unnamed		ACP vs. all controls	1.66667	1.52-1.9	21.2016	1.57257	1.37-1.8	9.68522	1.91534	1.67-2.2	19.0582
rs13239916	7	142479577	A	G	0.2394	0	0.647	rs78907924	0.818543	FALSE	PRSS3P2 (0 kb, intron/Intron/MODIFIER | nc-RNA/Non coding transcript/MODIFIER | near_gene/Upstream gene/MODIFIER); WBP1LP1 (6.9 kb); PRSS3P1 (7.8 kb); TRBJ2-1 (14 kb); TRBJ2-2 (15 kb); TRBJ2-2P (15 kb); TRBJ2-3 (15 kb); TRBJ2-4 (15 kb); TRBJ2-5 (15 kb); TRBJ2-6 (15 kb); TRBJ2-7 (16 kb); PRSS1 (19 kb); TRBC2 (19 kb); TRBV30 (31 kb); TRBV29-1 (31 kb); PGBD4P1 (49 kb)	-0.285035	-0.199176	6.23	0.215808	0.441 Pancreatitis	C7orf34 | ENST00000390397 | ENST00000390401 | ENST00000390418 | ENST00000390419 | EPHB6 | PRSS1 | PRSS3P1 | PRSS3P2 | TRBV19 | TRBV24-1 | TRBV28 | TRBV29-1 | U66060.1-19 | U66060.1-23 | U66061.1-11 | unnamed		ACP vs. all controls	1.88182	1.67-2.1	21.0114	1.90404	1.61-2.2	13.0671	2.13493	1.82-2.5	18.6444
rs2855990	7	142487745	T	C	0.4514	0	0.998	rs2734221	0.981105	FALSE	WBP1LP1 (0.4 kb, near_gene/Upstream gene/MODIFIER); PRSS3P2 (5.3 kb); TRBJ2-1 (6.3 kb); TRBJ2-2 (6.5 kb); TRBJ2-2P (6.6 kb); TRBJ2-3 (6.8 kb); TRBJ2-4 (6.9 kb); TRBJ2-5 (7.1 kb); TRBJ2-6 (7.2 kb); TRBJ2-7 (7.4 kb); TRBC2 (11 kb); PRSS3P1 (16 kb); TRBV30 (23 kb); PRSS1 (27 kb); TRBV29-1 (39 kb)	-0.0132076	0.255648	5.053	0.580129	0.657 Pancreatitis	C7orf34 | ENST00000390397 | ENST00000390401 | ENST00000390418 | ENST00000390419 | EPHB6 | PRSS1 | PRSS3P1 | PRSS3P2 | TRBV19 | TRBV21-1 | TRBV24-1 | TRBV28 | TRBV29-1 | U66060.1-19 | U66060.1-21 | U66060.1-23 | U66061.1-11 | unnamed		ACP vs. all controls	1.51309	1.39-1.6	20.9229	1.52858	1.37-1.7	12.7983	1.60875	1.45-1.8	16.39
chr1:15774667:I	1	15774667	TC	T	0.1169	0	0.948	rs545634	0.993162	FALSE	CTRC (0 kb, 3'utr/3 prime UTR/MODIFIER | near_gene/Downstream gene/MODIFIER); CELA2A (8.6 kb); CELA2B (18 kb); EFHD2 (18 kb); CASP9 (43 kb); FHAD1 (48 kb)			0.142		NA	AGMAT | CASP9 | CTRC | DNAJC16 | PLEKHM2 | RSC1A1		ACP vs. all controls	1.81455	1.61-2	20.8838	1.67701	1.43-2	8.6983	1.94704	1.64-2.3	13.281
rs2734222	7	142487836	C	T	0.4509	2	1	rs2734221	0.979706	FALSE	WBP1LP1 (0.49 kb, near_gene/Upstream gene/MODIFIER); PRSS3P2 (5.4 kb); TRBJ2-1 (6.2 kb); TRBJ2-2 (6.4 kb); TRBJ2-2P (6.5 kb); TRBJ2-3 (6.7 kb); TRBJ2-4 (6.8 kb); TRBJ2-5 (7 kb); TRBJ2-6 (7.1 kb); TRBJ2-7 (7.3 kb); TRBC2 (11 kb); PRSS3P1 (16 kb); TRBV30 (22 kb); PRSS1 (27 kb); TRBV29-1 (39 kb)	-0.437779	0.197177	0.56	0.430576	0.657 Pancreatitis	C7orf34 | ENST00000390397 | ENST00000390401 | ENST00000390418 | ENST00000390419 | EPHB6 | PRSS1 | PRSS3P1 | PRSS3P2 | TRBV19 | TRBV21-1 | TRBV24-1 | TRBV28 | TRBV29-1 | U66060.1-19 | U66060.1-21 | U66060.1-23 | U66061.1-11 | unnamed		ACP vs. all controls	1.5108	1.39-1.6	20.7767	1.52648	1.37-1.7	12.7205	1.60231	1.45-1.8	16.1846
rs2734223	7	142488146	A	G	0.4542	0	0.988	rs2734221	0.981364	FALSE	WBP1LP1 (0.8 kb, near_gene/Upstream gene/MODIFIER); PRSS3P2 (5.7 kb); TRBJ2-1 (5.9 kb); TRBJ2-2 (6.1 kb); TRBJ2-2P (6.2 kb); TRBJ2-3 (6.4 kb); TRBJ2-4 (6.5 kb); TRBJ2-5 (6.7 kb); TRBJ2-6 (6.8 kb); TRBJ2-7 (7 kb); TRBC2 (11 kb); PRSS3P1 (16 kb); TRBV30 (22 kb); PRSS1 (27 kb); TRBV29-1 (39 kb)	-0.49448	0.264494	0.264	0.530916	0.675 Pancreatitis	C7orf34 | ENST00000390388 | ENST00000390397 | ENST00000390401 | ENST00000390418 | ENST00000390419 | EPHB6 | PRSS1 | PRSS3P1 | PRSS3P2 | TRBV19 | TRBV21-1 | TRBV24-1 | TRBV28 | TRBV29-1 | U66060.1-19 | U66060.1-21 | U66060.1-23 | U66061.1-11 | unnamed		ACP vs. all controls	1.51263	1.39-1.6	20.6992	1.52091	1.37-1.7	12.4715	1.61473	1.45-1.8	16.5758
rs73740319	7	142483361	A	C	0.2009	0	0.652	rs78907924	0.926477	FALSE	PRSS3P2 (0.94 kb, near_gene/Downstream gene/MODIFIER); WBP1LP1 (3.1 kb, near_gene/Downstream gene/MODIFIER); TRBJ2-1 (11 kb); TRBJ2-2 (11 kb); TRBJ2-2P (11 kb); TRBJ2-3 (11 kb); TRBJ2-4 (11 kb); TRBJ2-5 (11 kb); TRBJ2-6 (12 kb); PRSS3P1 (12 kb); TRBJ2-7 (12 kb); TRBC2 (15 kb); PRSS1 (22 kb); TRBV30 (27 kb); TRBV29-1 (35 kb)	-0.54307	-0.238692	5.736	0.473687	0.447 Pancreatitis	C7orf34 | ENST00000390397 | ENST00000390401 | ENST00000390418 | ENST00000390419 | EPHB6 | PRSS1 | PRSS3P1 | PRSS3P2 | TRBV19 | TRBV24-1 | TRBV28 | TRBV29-1 | U66060.1-19 | U66060.1-23 | U66061.1-11 | unnamed		ACP vs. all controls	1.97433	1.72-2.3	20.6726	2.06271	1.72-2.4	14.2921	2.13858	1.79-2.6	16.0977
rs138700403	7	142476452	C	A	0.2877	0	0.639	rs138700403	1	TRUE	PRSS3P2 (1.6 kb, near_gene/Upstream gene/MODIFIER); PRSS3P1 (4.7 kb, near_gene/Downstream gene/MODIFIER); WBP1LP1 (10 kb); PRSS1 (16 kb); TRBJ2-1 (18 kb); TRBJ2-2 (18 kb); TRBJ2-2P (18 kb); TRBJ2-3 (18 kb); TRBJ2-4 (18 kb); TRBJ2-5 (18 kb); TRBJ2-6 (18 kb); TRBJ2-7 (19 kb); TRBC2 (22 kb); TRBV29-1 (28 kb); TRBV30 (34 kb); PGBD4P1 (46 kb); TRBV28 (47 kb)	-0.923722	-0.291027	0.394	0.298645	0.331 Pancreatitis	C7orf34 | ENST00000390397 | ENST00000390401 | ENST00000390418 | ENST00000390419 | EPHB6 | PRSS1 | PRSS3P1 | PRSS3P2 | TRBV19 | TRBV24-1 | TRBV28 | TRBV29-1 | U66060.1-19 | U66060.1-23 | U66061.1-11 | unnamed		ACP vs. all controls	1.7968	1.6-2.01	20.6293	1.8003	1.55-2.09	12.5205	1.9478	1.68-2.26	16.1403
rs3134901	7	142489873	T	G	0.4628	0	0.983	rs2734221	0.941866	FALSE	WBP1LP1 (2.5 kb, near_gene/Upstream gene/MODIFIER); TRBJ2-1 (4.2 kb, near_gene/Upstream gene/MODIFIER); TRBJ2-2 (4.4 kb, near_gene/Upstream gene/MODIFIER); TRBJ2-2P (4.5 kb, near_gene/Upstream gene/MODIFIER); TRBJ2-3 (4.7 kb, near_gene/Upstream gene/MODIFIER); TRBJ2-4 (4.8 kb, near_gene/Upstream gene/MODIFIER); TRBJ2-5 (4.9 kb, near_gene/Upstream gene/MODIFIER); TRBJ2-6 (5 kb); TRBJ2-7 (5.3 kb); …	-0.683859	-0.256924	5.554	0.272389	0.612 Pancreatitis	C7orf34 | ENST00000390397 | ENST00000390401 | ENST00000390418 | ENST00000390419 | EPHB6 | PRSS1 | PRSS3P1 | PRSS3P2 | TRBV19 | TRBV21-1 | TRBV24-1 | TRBV28 | TRBV29-1 | U66060.1-19 | U66060.1-23 | U66061.1-11 | unnamed		ACP vs. all controls	1.51057	1.39-1.6	20.4735	1.51378	1.35-1.7	12.1267	1.60901	1.45-1.8	16.1739
rs73742444	7	142479289	C	T	0.1767	0	0.634	rs78907924	0.882602	FALSE	PRSS3P2 (0 kb, intron/Intron/MODIFIER | nc-RNA/Non coding transcript/MODIFIER | near_gene/Upstream gene/MODIFIER); WBP1LP1 (7.2 kb); PRSS3P1 (7.5 kb); TRBJ2-1 (15 kb); TRBJ2-2 (15 kb); TRBJ2-2P (15 kb); TRBJ2-3 (15 kb); TRBJ2-4 (15 kb); TRBJ2-5 (16 kb); TRBJ2-6 (16 kb); TRBJ2-7 (16 kb); PRSS1 (18 kb); TRBC2 (19 kb); TRBV29-1 (31 kb); TRBV30 (31 kb); PGBD4P1 (49 kb)	-0.5088	-0.242885	1.319	0.115036	0.417 Pancreatitis	C7orf34 | ENST00000390397 | ENST00000390401 | ENST00000390418 | ENST00000390419 | EPHB6 | PRSS1 | PRSS3P1 | PRSS3P2 | TRBV19 | TRBV24-1 | TRBV28 | TRBV29-1 | U66060.1-19 | U66060.1-23 | U66061.1-11 | unnamed		ACP vs. all controls	2.06954	1.79-2.4	20.4444	2.10305	1.75-2.5	13.2855	2.25581	1.89-2.7	16.3161
rs3114488	7	142489869	T	C	0.4638	0	0.982	rs2734221	0.939562	FALSE	WBP1LP1 (2.5 kb, near_gene/Upstream gene/MODIFIER); TRBJ2-1 (4.2 kb, near_gene/Upstream gene/MODIFIER); TRBJ2-2 (4.4 kb, near_gene/Upstream gene/MODIFIER); TRBJ2-2P (4.5 kb, near_gene/Upstream gene/MODIFIER); TRBJ2-3 (4.7 kb, near_gene/Upstream gene/MODIFIER); TRBJ2-4 (4.8 kb, near_gene/Upstream gene/MODIFIER); TRBJ2-5 (4.9 kb, near_gene/Upstream gene/MODIFIER); TRBJ2-6 (5.1 kb); TRBJ2-7 (5.3 kb)…	-0.33354	-0.20897	8.896	0.474076	0.607 Pancreatitis	C7orf34 | ENST00000390397 | ENST00000390401 | ENST00000390418 | ENST00000390419 | EPHB6 | PRSS1 | PRSS3P1 | PRSS3P2 | TRBV19 | TRBV21-1 | TRBV24-1 | TRBV28 | TRBV29-1 | U66060.1-19 | U66060.1-23 | U66061.1-11 | unnamed		ACP vs. all controls	1.50943	1.39-1.6	20.4018	1.5186	1.37-1.7	12.26	1.61551	1.45-1.8	16.4353
rs10952531	7	142470691	C	G	0.4635	0	0.679	rs35031873	0.820554	FALSE	PRSS3P1 (0 kb, nc-exon/Non coding transcript exon/MODIFIER | nc-RNA/Non coding transcript/MODIFIER); PRSS3P2 (7.4 kb); PRSS1 (9.8 kb); WBP1LP1 (16 kb); TRBV29-1 (22 kb); TRBJ2-1 (23 kb); TRBJ2-2 (24 kb); TRBJ2-2P (24 kb); TRBJ2-3 (24 kb); TRBJ2-4 (24 kb); TRBJ2-5 (24 kb); TRBJ2-6 (24 kb); TRBJ2-7 (24 kb); TRBC2 (28 kb); TRBV30 (40 kb); PGBD4P1 (40 kb); TRBV28 (42 kb); TRBV27 (47 kb)	0.488716	-0.0672277	0.716	0.337909	0.523 Pancreatitis	C7orf34 | ENST00000390397 | ENST00000390401 | ENST00000390418 | ENST00000390419 | EPHB6 | PRSS1 | PRSS3P1 | PRSS3P2 | TRBV19 | TRBV24-1 | TRBV28 | TRBV29-1 | U66060.1-19 | U66060.1-23 | U66061.1-11 | unnamed		ACP vs. all controls	1.63159	1.49-1.8	20.2329	1.56031	1.37-1.8	9.83107	1.86951	1.64-2.1	18.5406
rs6464530	7	142477838	C	G	0.241	0	0.636	rs6464530	1	TRUE	PRSS3P2 (0.23 kb, near_gene/Upstream gene/MODIFIER); PRSS3P1 (6 kb); WBP1LP1 (8.6 kb); TRBJ2-1 (16 kb); TRBJ2-2 (16 kb); TRBJ2-2P (17 kb); TRBJ2-3 (17 kb); TRBJ2-4 (17 kb); PRSS1 (17 kb); TRBJ2-5 (17 kb); TRBJ2-6 (17 kb); TRBJ2-7 (17 kb); TRBC2 (21 kb); TRBV29-1 (29 kb); TRBV30 (32 kb); PGBD4P1 (47 kb); TRBV28 (49 kb)	-0.389524	-0.22046	5.996	0.459942	0.4 Pancreatitis	C7orf34 | ENST00000390397 | ENST00000390401 | ENST00000390418 | ENST00000390419 | EPHB6 | PRSS1 | PRSS3P1 | PRSS3P2 | TRBV19 | TRBV24-1 | TRBV28 | TRBV29-1 | U66060.1-19 | U66060.1-23 | U66061.1-11 | unnamed		ACP vs. all controls	1.8773	1.66-2.13	20.2318	1.9947	1.69-2.35	14.4678	2.071	1.76-2.43	16.6544
rs2367486	7	142492130	G	A	0.4547	2	1	rs2734221	0.954363	FALSE	TRBJ2-1 (1.9 kb, near_gene/Upstream gene/MODIFIER); TRBJ2-2 (2.1 kb, near_gene/Upstream gene/MODIFIER); TRBJ2-2P (2.3 kb, near_gene/Upstream gene/MODIFIER); TRBJ2-3 (2.4 kb, near_gene/Upstream gene/MODIFIER); TRBJ2-4 (2.6 kb, near_gene/Upstream gene/MODIFIER); TRBJ2-5 (2.7 kb, near_gene/Upstream gene/MODIFIER); TRBJ2-6 (2.8 kb, near_gene/Upstream gene/MODIFIER); TRBJ2-7 (3 kb, near_gene/Upstream …	0.0478291	0.182501	5.121	0.461783	0.648 Pancreatitis	C7orf34 | ENST00000390397 | ENST00000390401 | ENST00000390418 | ENST00000390419 | EPHB6 | PRSS1 | PRSS3P1 | PRSS3P2 | TRBV19 | TRBV21-1 | TRBV24-1 | TRBV28 | TRBV29-1 | TRBV30 | U66060.1-19 | U66060.1-23 | U66061.1-11 | unnamed		ACP vs. all controls	1.5015	1.39-1.6	20.1853	1.51584	1.37-1.7	12.3705	1.59236	1.43-1.8	15.8363
rs191359111	7	142485746	C	T	0.1971	0	0.638	rs78907924	0.807326	FALSE	WBP1LP1 (0.71 kb, near_gene/Downstream gene/MODIFIER); PRSS3P2 (3.3 kb, near_gene/Downstream gene/MODIFIER); TRBJ2-1 (8.3 kb); TRBJ2-2 (8.5 kb); TRBJ2-2P (8.6 kb); TRBJ2-3 (8.8 kb); TRBJ2-4 (8.9 kb); TRBJ2-5 (9.1 kb); TRBJ2-6 (9.2 kb); TRBJ2-7 (9.4 kb); TRBC2 (13 kb); PRSS3P1 (14 kb); TRBV30 (25 kb); PRSS1 (25 kb); TRBV29-1 (37 kb)	-0.304557	-0.199293	8.449	0.474884	0.446 Pancreatitis	C7orf34 | ENST00000390397 | ENST00000390401 | ENST00000390418 | ENST00000390419 | EPHB6 | PRSS1 | PRSS3P1 | PRSS3P2 | TRBV19 | TRBV24-1 | TRBV28 | TRBV29-1 | U66060.1-19 | U66060.1-23 | U66061.1-11 | unnamed		ACP vs. all controls	1.9773	1.73-2.26	20.1281	2.0251	1.7-2.41	13.2418	2.1312	1.79-2.54	15.6197
rs2734224	7	142488688	G	A	0.4543	2	1	rs2734221	0.965149	FALSE	WBP1LP1 (1.3 kb, near_gene/Upstream gene/MODIFIER); TRBJ2-1 (5.4 kb); TRBJ2-2 (5.6 kb); TRBJ2-2P (5.7 kb); TRBJ2-3 (5.8 kb); TRBJ2-4 (6 kb); TRBJ2-5 (6.1 kb); TRBJ2-6 (6.2 kb); PRSS3P2 (6.3 kb); TRBJ2-7 (6.5 kb); TRBC2 (10 kb); PRSS3P1 (17 kb); TRBV30 (22 kb); PRSS1 (28 kb); TRBV29-1 (40 kb)	-0.151642	-0.183242	4.107	0.719278	0.649 Pancreatitis	C7orf34 | ENST00000390397 | ENST00000390401 | ENST00000390418 | ENST00000390419 | EPHB6 | PRSS1 | PRSS3P1 | PRSS3P2 | TRBV19 | TRBV21-1 | TRBV24-1 | TRBV28 | TRBV29-1 | U66060.1-19 | U66060.1-23 | U66061.1-11 | unnamed		ACP vs. all controls	1.4997	1.39-1.6	20.0713	1.51515	1.37-1.7	12.3027	1.59439	1.43-1.8	15.8632
rs4145394	7	142477981	A	C	0.2797	0	0.626	rs4145394	1	TRUE	PRSS3P2 (0.083 kb, near_gene/Upstream gene/MODIFIER); PRSS3P1 (6.2 kb); WBP1LP1 (8.5 kb); TRBJ2-1 (16 kb); TRBJ2-2 (16 kb); TRBJ2-2P (16 kb); TRBJ2-3 (17 kb); TRBJ2-4 (17 kb); TRBJ2-5 (17 kb); TRBJ2-6 (17 kb); PRSS1 (17 kb); TRBJ2-7 (17 kb); TRBC2 (21 kb); TRBV29-1 (29 kb); TRBV30 (32 kb); PGBD4P1 (47 kb); TRBV28 (49 kb)	-0.034375	0.216738	9.342	0.449732	0.426 Pancreatitis	C7orf34 | ENST00000390397 | ENST00000390401 | ENST00000390418 | ENST00000390419 | EPHB6 | PRSS1 | PRSS3P1 | PRSS3P2 | TRBV19 | TRBV24-1 | TRBV28 | TRBV29-1 | U66060.1-19 | U66060.1-23 | U66061.1-11 | unnamed		ACP vs. all controls	1.80668	1.61-2	20.0677	1.82349	1.56-2.1	12.4196	2.0028	1.72-2.3	16.5748
rs3114489	7	142489405	G	A	0.4544	0	0.998	rs2734221	0.962184	FALSE	WBP1LP1 (2.1 kb, near_gene/Upstream gene/MODIFIER); TRBJ2-1 (4.6 kb, near_gene/Upstream gene/MODIFIER); TRBJ2-2 (4.8 kb, near_gene/Upstream gene/MODIFIER); TRBJ2-2P (5 kb, near_gene/Upstream gene/MODIFIER); TRBJ2-3 (5.1 kb); TRBJ2-4 (5.3 kb); TRBJ2-5 (5.4 kb); TRBJ2-6 (5.5 kb); TRBJ2-7 (5.7 kb); PRSS3P2 (7 kb); TRBC2 (9.3 kb); PRSS3P1 (18 kb); TRBV30 (21 kb); PRSS1 (28 kb); TRBV29-1 (41 kb)	-0.168806	-0.177919	4.24	0.768158	0.643 Pancreatitis	C7orf34 | ENST00000390397 | ENST00000390401 | ENST00000390418 | ENST00000390419 | EPHB6 | PRSS1 | PRSS3P1 | PRSS3P2 | TRBV19 | TRBV21-1 | TRBV24-1 | TRBV28 | TRBV29-1 | U66060.1-19 | U66060.1-23 | U66061.1-11 | unnamed		ACP vs. all controls	1.49858	1.39-1.6	20.0003	1.51035	1.35-1.7	12.1268	1.60077	1.45-1.8	16.0658
rs3134902	7	142493129	T	G	0.4557	0	0.997	rs2734221	0.953556	FALSE	TRBJ2-1 (0.92 kb, near_gene/Upstream gene/MODIFIER); TRBJ2-2 (1.1 kb, near_gene/Upstream gene/MODIFIER); TRBJ2-2P (1.3 kb, near_gene/Upstream gene/MODIFIER); TRBJ2-3 (1.4 kb, near_gene/Upstream gene/MODIFIER); TRBJ2-4 (1.6 kb, near_gene/Upstream gene/MODIFIER); TRBJ2-5 (1.7 kb, near_gene/Upstream gene/MODIFIER); TRBJ2-6 (1.8 kb, near_gene/Upstream gene/MODIFIER); TRBJ2-7 (2 kb, near_gene/Upstream…	-0.558286	-0.256673	0.089	0.263131	0.628 Pancreatitis	C7orf34 | ENST00000390397 | ENST00000390401 | ENST00000390418 | ENST00000390419 | EPHB6 | PRSS1 | PRSS3P1 | PRSS3P2 | TRBV19 | TRBV21-1 | TRBV24-1 | TRBV28 | TRBV29-1 | U66060.1-19 | U66060.1-23 | U66061.1-11 | unnamed		ACP vs. all controls	1.49745	1.39-1.6	19.9295	1.514	1.37-1.7	12.2606	1.60077	1.45-1.8	16.0658
rs11772526	7	142485399	T	G	0.235	0	0.689	rs78907924	0.825194	FALSE	WBP1LP1 (1.1 kb, near_gene/Downstream gene/MODIFIER); PRSS3P2 (3 kb, near_gene/Downstream gene/MODIFIER); TRBJ2-1 (8.6 kb); TRBJ2-2 (8.8 kb); TRBJ2-2P (9 kb); TRBJ2-3 (9.1 kb); TRBJ2-4 (9.3 kb); TRBJ2-5 (9.4 kb); TRBJ2-6 (9.5 kb); TRBJ2-7 (9.7 kb); TRBC2 (13 kb); PRSS3P1 (14 kb); PRSS1 (24 kb); TRBV30 (25 kb); TRBV29-1 (37 kb)	-0.565853	-0.249877	2.711	0.399655	0.434 Pancreatitis	C7orf34 | ENST00000390397 | ENST00000390401 | ENST00000390418 | ENST00000390419 | EPHB6 | PRSS1 | PRSS3P1 | PRSS3P2 | TRBV19 | TRBV24-1 | TRBV28 | TRBV29-1 | U66060.1-19 | U66060.1-23 | U66061.1-11 | unnamed		ACP vs. all controls	1.8205	1.61-2	19.859	1.85494	1.59-2.2	12.575	2.04876	1.75-2.4	17.7486
rs116471919	7	142477436	A	G	0.23	0	0.646	rs78907924	0.879178	FALSE	PRSS3P2 (0.63 kb, near_gene/Upstream gene/MODIFIER); PRSS3P1 (5.6 kb); WBP1LP1 (9 kb); PRSS1 (17 kb); TRBJ2-1 (17 kb); TRBJ2-2 (17 kb); TRBJ2-2P (17 kb); TRBJ2-3 (17 kb); TRBJ2-4 (17 kb); TRBJ2-5 (17 kb); TRBJ2-6 (17 kb); TRBJ2-7 (18 kb); TRBC2 (21 kb); TRBV29-1 (29 kb); TRBV30 (33 kb); PGBD4P1 (47 kb); TRBV28 (48 kb)	-0.180393	-0.191406	8.632	0.666609	0.439 Pancreatitis	C7orf34 | ENST00000390397 | ENST00000390401 | ENST00000390418 | ENST00000390419 | EPHB6 | PRSS1 | PRSS3P1 | PRSS3P2 | TRBV19 | TRBV24-1 | TRBV28 | TRBV29-1 | U66060.1-19 | U66060.1-23 | U66061.1-11 | unnamed		ACP vs. all controls	1.8498	1.64-2.1	19.393	1.89573	1.61-2.2	12.5807	2.03542	1.72-2.4	15.7641
rs183571242	7	142476436	T	C	0.2498	0	0.633	rs138700403	0.845758	FALSE	PRSS3P2 (1.6 kb, near_gene/Upstream gene/MODIFIER); PRSS3P1 (4.6 kb, near_gene/Downstream gene/MODIFIER); WBP1LP1 (10 kb); PRSS1 (16 kb); TRBJ2-1 (18 kb); TRBJ2-2 (18 kb); TRBJ2-2P (18 kb); TRBJ2-3 (18 kb); TRBJ2-4 (18 kb); TRBJ2-5 (18 kb); TRBJ2-6 (18 kb); TRBJ2-7 (19 kb); TRBC2 (22 kb); TRBV29-1 (28 kb); TRBV30 (34 kb); PGBD4P1 (46 kb); TRBV28 (47 kb)	-0.49941	-0.233083	4.415	0.198541	0.359 Pancreatitis	C7orf34 | ENST00000390397 | ENST00000390401 | ENST00000390418 | ENST00000390419 | EPHB6 | PRSS1 | PRSS3P1 | PRSS3P2 | TRBV19 | TRBV24-1 | TRBV28 | TRBV29-1 | U66060.1-19 | U66060.1-23 | U66061.1-11 | unnamed		ACP vs. all controls	1.824	1.62-2.06	19.3074	1.8446	1.58-2.16	12.2185	2.0013	1.71-2.34	15.8851
rs190251599	7	142478433	T	C	0.2241	0	0.64	rs78907924	0.853283	FALSE	PRSS3P2 (0 kb, intron/Intron/MODIFIER | nc-RNA/Non coding transcript/MODIFIER | near_gene/Upstream gene/MODIFIER); PRSS3P1 (6.6 kb); WBP1LP1 (8 kb); TRBJ2-1 (16 kb); TRBJ2-2 (16 kb); TRBJ2-2P (16 kb); TRBJ2-3 (16 kb); TRBJ2-4 (16 kb); TRBJ2-5 (16 kb); TRBJ2-6 (16 kb); TRBJ2-7 (17 kb); PRSS1 (18 kb); TRBC2 (20 kb); TRBV29-1 (30 kb); TRBV30 (32 kb); PGBD4P1 (48 kb); TRBV28 (49 kb)	-0.47876	-0.241056	4.597	0.403754	0.475 Pancreatitis	C7orf34 | ENST00000390397 | ENST00000390401 | ENST00000390418 | ENST00000390419 | EPHB6 | PRSS1 | PRSS3P1 | PRSS3P2 | TRBV19 | TRBV24-1 | TRBV28 | TRBV29-1 | U66060.1-19 | U66060.1-23 | U66061.1-11 | unnamed		ACP vs. all controls	1.8701	1.65-2.12	19.2906	1.9179	1.63-2.26	12.8968	2.0603	1.75-2.43	16.2055
rs66491909	23	105975499	A	G	0.2722	0	0.794	rs66491909	1	TRUE	RNF128 (0 kb, intron/Intron/MODIFIER)					0.819 Pancreatitis		CDIPT | PDGFD	ACP vs. all controls	2.14116	1.85-2.5	19.2188	2.50757	2-3.1	12.6112	2.16327	1.79-2.6	13.661
rs60095957	7	142450556	A	G	0.4967	0	0.826	rs60095957	1	TRUE	TRBV29-1 (1.8 kb, near_gene/Downstream gene/MODIFIER); PRSS1 (6.8 kb); PRSS3P1 (18 kb); PGBD4P1 (20 kb); TRBV28 (22 kb); TRBV27 (27 kb); PRSS3P2 (28 kb); TRBVB (31 kb); WBP1LP1 (36 kb); TRBJ2-1 (43 kb); TRBJ2-2 (44 kb); TRBJ2-2P (44 kb); TRBJ2-3 (44 kb); TRBJ2-4 (44 kb); TRBJ2-5 (44 kb); TRBJ2-6 (44 kb); TRBJ2-7 (45 kb); TRBV26 (47 kb); TRBC2 (48 kb)	-0.157499	-0.191083	9.566	0.815791	0.587 Pancreatitis	C7orf34 | ENST00000390388 | ENST00000390397 | ENST00000390401 | ENST00000390418 | ENST00000390419 | EPHB6 | PRSS1 | PRSS3P1 | PRSS3P2 | TRBV19 | TRBV21-1 | TRBV24-1 | TRBV28 | TRBV29-1 | U66060.1-19 | U66060.1-21 | U66060.1-23 | U66061.1-11 | unnamed		ACP vs. all controls	1.53775	1.41-1.7	19.0753	1.51906	1.35-1.7	10.6281	1.69463	1.52-1.9	16.731
rs10952536	7	142485386	T	C	0.2225	0	0.66	rs78907924	0.821705	FALSE	WBP1LP1 (1.1 kb, near_gene/Downstream gene/MODIFIER); PRSS3P2 (3 kb, near_gene/Downstream gene/MODIFIER); TRBJ2-1 (8.7 kb); TRBJ2-2 (8.9 kb); TRBJ2-2P (9 kb); TRBJ2-3 (9.1 kb); TRBJ2-4 (9.3 kb); TRBJ2-5 (9.4 kb); TRBJ2-6 (9.5 kb); TRBJ2-7 (9.8 kb); TRBC2 (13 kb); PRSS3P1 (14 kb); PRSS1 (24 kb); TRBV30 (25 kb); TRBV29-1 (37 kb)	-0.353059	-0.220886	8.651	0.670746	0.414 Pancreatitis	C7orf34 | ENST00000390397 | ENST00000390401 | ENST00000390418 | ENST00000390419 | EPHB6 | PRSS1 | PRSS3P1 | PRSS3P2 | TRBV19 | TRBV24-1 | TRBV28 | TRBV29-1 | U66060.1-19 | U66060.1-23 | U66061.1-11 | unnamed		ACP vs. all controls	1.8417	1.63-2.09	19.0143	1.8609	1.58-2.19	11.9588	2.009	1.71-2.36	15.537
rs2071361	7	142494606	G	C	0.4701	0	0.974	rs2734221	0.911516	FALSE	TRBJ2-3 (0.027 kb, near_gene/Downstream gene/MODIFIER); TRBJ2-4 (0.076 kb, near_gene/Upstream gene/MODIFIER); TRBJ2-2P (0.18 kb, near_gene/Downstream gene/MODIFIER); TRBJ2-5 (0.2 kb, near_gene/Upstream gene/MODIFIER); TRBJ2-2 (0.31 kb, near_gene/Downstream gene/MODIFIER); TRBJ2-6 (0.32 kb, near_gene/Upstream gene/MODIFIER); TRBJ2-1 (0.51 kb, near_gene/Downstream gene/MODIFIER); TRBJ2-7 (0.53 kb, …	0.137026	1.73749	8.256	0.243676	0.595 Pancreatitis	C7orf34 | ENST00000390397 | ENST00000390401 | ENST00000390418 | ENST00000390419 | EPHB6 | PRSS1 | PRSS3P1 | PRSS3P2 | TRBV19 | TRBV21-1 | TRBV24-1 | TRBV28 | TRBV29-1 | U66060.1-19 | U66060.1-23 | U66061.1-11 | unnamed		ACP vs. all controls	1.48148	1.37-1.6	18.8416	1.49432	1.35-1.7	11.4668	1.59898	1.43-1.8	15.718
rs12014762	23	106183670	T	C	0.193	0	0.864	rs12014762	1	TRUE	MORC4 (0 kb, intron/Intron/MODIFIER | near_gene/Downstream gene/MODIFIER); MORC4 (0.29 kb, intron/Intron/MODIFIER | near_gene/Downstream gene/MODIFIER)					0.693 Pancreatitis		CDIPT	ACP vs. all controls	2.21971	1.89-2.6	18.7458	2.52433	1.96-3.2	11.0216	2.19219	1.79-2.7	12.4211
rs55997683	23	106188179	A	G	0.1938	0	0.866	rs12014762	0.99714	FALSE	MORC4 (0 kb, intron/Intron/MODIFIER | near_gene/Upstream gene/MODIFIER)					0.693 Pancreatitis		CDIPT	ACP vs. all controls	2.21114	1.89-2.6	18.6578	2.51713	1.96-3.2	10.99	2.17412	1.79-2.6	12.2648
rs73742446	7	142479314	C	G	0.1744	0	0.603	rs73742446	1	TRUE	PRSS3P2 (0 kb, intron/Intron/MODIFIER | nc-RNA/Non coding transcript/MODIFIER | near_gene/Upstream gene/MODIFIER); WBP1LP1 (7.1 kb); PRSS3P1 (7.5 kb); TRBJ2-1 (15 kb); TRBJ2-2 (15 kb); TRBJ2-2P (15 kb); TRBJ2-3 (15 kb); TRBJ2-4 (15 kb); TRBJ2-5 (15 kb); TRBJ2-6 (16 kb); TRBJ2-7 (16 kb); PRSS1 (18 kb); TRBC2 (19 kb); TRBV29-1 (31 kb); TRBV30 (31 kb); PGBD4P1 (49 kb)	-0.562193	-0.261449	1.113	0.353646	0.371 Pancreatitis	C7orf34 | ENST00000390397 | ENST00000390401 | ENST00000390418 | ENST00000390419 | EPHB6 | PRSS1 | PRSS3P1 | PRSS3P2 | TRBV19 | TRBV24-1 | TRBV28 | TRBV29-1 | U66060.1-19 | U66060.1-23 | U66061.1-11 | unnamed		ACP vs. all controls	2.01491	1.75-2.3	18.3969	2.07039	1.72-2.5	12.2429	2.07727	1.72-2.5	12.9091
rs11763225	7	142477444	G	C	0.2377	0	0.642	rs78907924	0.85091	FALSE	PRSS3P2 (0.62 kb, near_gene/Upstream gene/MODIFIER); PRSS3P1 (5.6 kb); WBP1LP1 (9 kb); PRSS1 (17 kb); TRBJ2-1 (17 kb); TRBJ2-2 (17 kb); TRBJ2-2P (17 kb); TRBJ2-3 (17 kb); TRBJ2-4 (17 kb); TRBJ2-5 (17 kb); TRBJ2-6 (17 kb); TRBJ2-7 (18 kb); TRBC2 (21 kb); TRBV29-1 (29 kb); TRBV30 (33 kb); PGBD4P1 (47 kb); TRBV28 (48 kb)	-0.26515	-0.203476	5.875	0.525692	0.426 Pancreatitis	C7orf34 | ENST00000390397 | ENST00000390401 | ENST00000390418 | ENST00000390419 | EPHB6 | PRSS1 | PRSS3P1 | PRSS3P2 | TRBV19 | TRBV24-1 | TRBV28 | TRBV29-1 | U66060.1-19 | U66060.1-23 | U66061.1-11 | unnamed		ACP vs. all controls	1.80505	1.59-2	18.331	1.83925	1.56-2.2	11.6454	2.01491	1.72-2.4	15.6976
rs12012022	23	106221490	T	C	0.1934	0	0.868	rs12014762	0.994477	FALSE	MORC4 (0 kb, intron/Intron/MODIFIER)					0.693 Pancreatitis		CDIPT | PDGFD	ACP vs. all controls	2.19219	1.85-2.6	18.2735	2.49728	1.92-3.2	10.8148	2.15565	1.75-2.6	12.0132
rs3114486	7	142492930	C	T	0.4366	0	0.983	rs2734221	0.904954	FALSE	TRBJ2-1 (1.1 kb, near_gene/Upstream gene/MODIFIER); TRBJ2-2 (1.3 kb, near_gene/Upstream gene/MODIFIER); TRBJ2-2P (1.5 kb, near_gene/Upstream gene/MODIFIER); TRBJ2-3 (1.6 kb, near_gene/Upstream gene/MODIFIER); TRBJ2-4 (1.8 kb, near_gene/Upstream gene/MODIFIER); TRBJ2-5 (1.9 kb, near_gene/Upstream gene/MODIFIER); TRBJ2-6 (2 kb, near_gene/Upstream gene/MODIFIER); TRBJ2-7 (2.2 kb, near_gene/Upstream …	-0.835395	-0.278267	0.081	0.247131	0.532 Pancreatitis	C7orf34 | ENST00000390397 | ENST00000390401 | ENST00000390418 | ENST00000390419 | EPHB6 | PRSS1 | PRSS3P1 | PRSS3P2 | TRBV19 | TRBV21-1 | TRBV24-1 | TRBV28 | TRBV29-1 | U66060.1-19 | U66060.1-23 | U66061.1-11 | unnamed		ACP vs. all controls	1.47754	1.37-1.6	18.2571	1.50286	1.35-1.7	11.653	1.57754	1.41-1.8	15.0274
rs144184641	7	142483032	C	T	0.2098	0	0.614	rs144184641	1	TRUE	PRSS3P2 (0.62 kb, near_gene/Downstream gene/MODIFIER); WBP1LP1 (3.4 kb, near_gene/Downstream gene/MODIFIER); TRBJ2-1 (11 kb); TRBJ2-2 (11 kb); PRSS3P1 (11 kb); TRBJ2-2P (11 kb); TRBJ2-3 (11 kb); TRBJ2-4 (12 kb); TRBJ2-5 (12 kb); TRBJ2-6 (12 kb); TRBJ2-7 (12 kb); TRBC2 (16 kb); PRSS1 (22 kb); TRBV30 (27 kb); TRBV29-1 (34 kb)	-0.828583	-0.281461	1.868	0.376544	0.385 Pancreatitis	C7orf34 | ENST00000390397 | ENST00000390401 | ENST00000390418 | ENST00000390419 | EPHB6 | PRSS1 | PRSS3P1 | PRSS3P2 | TRBV19 | TRBV24-1 | TRBV28 | TRBV29-1 | U66060.1-19 | U66060.1-23 | U66061.1-11 | unnamed		ACP vs. all controls	1.8983	1.66-2.17	18.1419	2.0446	1.72-2.44	13.44	1.9921	1.68-2.37	13.2034
rs4500012	7	142477851	G	C	0.2573	0	0.617	rs6464530	0.896513	FALSE	PRSS3P2 (0.21 kb, near_gene/Upstream gene/MODIFIER); PRSS3P1 (6.1 kb); WBP1LP1 (8.6 kb); TRBJ2-1 (16 kb); TRBJ2-2 (16 kb); TRBJ2-2P (17 kb); TRBJ2-3 (17 kb); TRBJ2-4 (17 kb); PRSS1 (17 kb); TRBJ2-5 (17 kb); TRBJ2-6 (17 kb); TRBJ2-7 (17 kb); TRBC2 (21 kb); TRBV29-1 (29 kb); TRBV30 (32 kb); PGBD4P1 (47 kb); TRBV28 (49 kb)	-0.777633	-0.273534	0.216	0.389156	0.378 Pancreatitis	C7orf34 | ENST00000390397 | ENST00000390401 | ENST00000390418 | ENST00000390419 | EPHB6 | PRSS1 | PRSS3P1 | PRSS3P2 | TRBV19 | TRBV24-1 | TRBV28 | TRBV29-1 | U66060.1-19 | U66060.1-23 | U66061.1-11 | unnamed		ACP vs. all controls	1.7927	1.59-2.03	18.0918	1.9548	1.66-2.3	14.0594	1.9327	1.65-2.27	14.1733
rs3114487	7	142492887	C	T	0.4378	0	0.984	rs2734221	0.900118	FALSE	TRBJ2-1 (1.2 kb, near_gene/Upstream gene/MODIFIER); TRBJ2-2 (1.4 kb, near_gene/Upstream gene/MODIFIER); TRBJ2-2P (1.5 kb, near_gene/Upstream gene/MODIFIER); TRBJ2-3 (1.6 kb, near_gene/Upstream gene/MODIFIER); TRBJ2-4 (1.8 kb, near_gene/Upstream gene/MODIFIER); TRBJ2-5 (1.9 kb, near_gene/Upstream gene/MODIFIER); TRBJ2-6 (2 kb, near_gene/Upstream gene/MODIFIER); TRBJ2-7 (2.3 kb, near_gene/Upstream …	-0.660636	-0.260052	0.335	0.452721	0.527 Pancreatitis	C7orf34 | ENST00000390397 | ENST00000390401 | ENST00000390418 | ENST00000390419 | EPHB6 | PRSS1 | PRSS3P1 | PRSS3P2 | TRBV19 | TRBV21-1 | TRBV24-1 | TRBV28 | TRBV29-1 | U66060.1-19 | U66060.1-23 | U66061.1-11 | unnamed		ACP vs. all controls	1.47254	1.35-1.6	18.0387	1.49835	1.35-1.7	11.532	1.57729	1.41-1.8	15.0175
rs11762011	7	142483515	C	G	0.2698	0	0.64	rs11762011	1	TRUE	PRSS3P2 (1.1 kb, near_gene/Downstream gene/MODIFIER); WBP1LP1 (2.9 kb, near_gene/Downstream gene/MODIFIER); TRBJ2-1 (11 kb); TRBJ2-2 (11 kb); TRBJ2-2P (11 kb); TRBJ2-3 (11 kb); TRBJ2-4 (11 kb); TRBJ2-5 (11 kb); TRBJ2-6 (11 kb); TRBJ2-7 (12 kb); PRSS3P1 (12 kb); TRBC2 (15 kb); PRSS1 (23 kb); TRBV30 (27 kb); TRBV29-1 (35 kb)	-0.246063	-0.197281	5.952	0.549076	0.4 Pancreatitis	AC091742.5-2 | C7orf34 | ENST00000390397 | ENST00000390401 | ENST00000390418 | ENST00000390419 | EPHB6 | MGAM | PRSS1 | PRSS3P1 | PRSS3P2 | RP11-1220K2.2 | TRBV19 | TRBV24-1 | TRBV28 | TRBV29-1 | TRPV6 | U66060.1-19 | U66060.1-23 | U66061.1-11 | unnamed		ACP vs. all controls	1.7449	1.56-2	17.8159	1.9084	1.64-2.2	14.217	1.85943	1.59-2.2	13.6724
rs149506335	7	142484308	C	G	0.2729	0	0.594	rs149506335	1	TRUE	PRSS3P2 (1.9 kb, near_gene/Downstream gene/MODIFIER); WBP1LP1 (2.1 kb, near_gene/Downstream gene/MODIFIER); TRBJ2-1 (9.7 kb); TRBJ2-2 (9.9 kb); TRBJ2-2P (10 kb); TRBJ2-3 (10 kb); TRBJ2-4 (10 kb); TRBJ2-5 (10 kb); TRBJ2-6 (11 kb); TRBJ2-7 (11 kb); PRSS3P1 (13 kb); TRBC2 (14 kb); PRSS1 (23 kb); TRBV30 (26 kb); TRBV29-1 (36 kb)	-0.609063	0.901672	0.779	0.0784145	0.308 Pancreatitis	C7orf34 | ENST00000390397 | ENST00000390401 | ENST00000390418 | ENST00000390419 | EPHB6 | PRSS1 | PRSS3P1 | PRSS3P2 | TRBV19 | TRBV24-1 | TRBV28 | TRBV29-1 | U66060.1-19 | U66060.1-23 | U66061.1-11 | unnamed		ACP vs. all controls	1.7766	1.57-2.01	17.7798	1.7567	1.5-2.06	10.1304	1.9159	1.64-2.24	14.1805
rs56226947	23	106320950	A	G	0.1838	0	0.753	rs12014762	0.898321	FALSE	RBM41 (0 kb, intron/NMD transcript/MODIFIER | intron/Intron/MODIFIER)					0.57 Pancreatitis		CDIPT	ACP vs. all controls	2.3167	1.92-2.8	17.7588	2.73386	2.08-3.6	10.9181	2.2491	1.82-2.8	11.3294
rs192514996	7	142486040	G	T	0.1511	0	0.577	rs192514996	1	TRUE	WBP1LP1 (0.41 kb, near_gene/Downstream gene/MODIFIER); PRSS3P2 (3.6 kb, near_gene/Downstream gene/MODIFIER); TRBJ2-1 (8 kb); TRBJ2-2 (8.2 kb); TRBJ2-2P (8.3 kb); TRBJ2-3 (8.5 kb); TRBJ2-4 (8.6 kb); TRBJ2-5 (8.8 kb); TRBJ2-6 (8.9 kb); TRBJ2-7 (9.1 kb); TRBC2 (13 kb); PRSS3P1 (14 kb); TRBV30 (24 kb); PRSS1 (25 kb); TRBV29-1 (37 kb)	-0.277713	-0.204229	5.922	0.675023	0.216 Pancreatitis	C7orf34 | ENST00000390397 | ENST00000390401 | ENST00000390418 | ENST00000390419 | EPHB6 | PRSS3P1 | PRSS3P2 | TRBV19 | TRBV24-1 | TRBV28 | TRBV29-1 | U66060.1-19 | U66060.1-23 | U66061.1-11 | unnamed		ACP vs. all controls	2.1017	1.79-2.46	17.2699	2.1379	1.74-2.62	11.257	2.2899	1.87-2.81	13.7769
rs4457242	7	142485104	A	G	0.4385	0	0.601	rs4457242	1	TRUE	WBP1LP1 (1.3 kb, near_gene/Downstream gene/MODIFIER); PRSS3P2 (2.7 kb, near_gene/Downstream gene/MODIFIER); TRBJ2-1 (8.9 kb); TRBJ2-2 (9.1 kb); TRBJ2-2P (9.3 kb); TRBJ2-3 (9.4 kb); TRBJ2-4 (9.6 kb); TRBJ2-5 (9.7 kb); TRBJ2-6 (9.8 kb); TRBJ2-7 (10 kb); PRSS3P1 (13 kb); TRBC2 (14 kb); PRSS1 (24 kb); TRBV30 (25 kb); TRBV29-1 (36 kb)	-0.327937	-0.213827	7.605	0.444797	0.287 Pancreatitis	C7orf34 | ENST00000390397 | ENST00000390401 | ENST00000390418 | ENST00000390419 | EPHB6 | PRSS1 | PRSS3P1 | PRSS3P2 | TRBV19 | TRBV24-1 | TRBV28 | TRBV29-1 | U66060.1-19 | U66060.1-23 | U66061.1-11 | unnamed		ACP vs. all controls	1.62813	1.47-1.8	17.0998	1.72771	1.49-2	12.1811	1.77999	1.54-2	14.0731
rs73742434	7	142477815	A	C	0.3423	0	0.602	rs73742434	1	TRUE	PRSS3P2 (0.25 kb, near_gene/Upstream gene/MODIFIER); PRSS3P1 (6 kb); WBP1LP1 (8.6 kb); TRBJ2-1 (16 kb); TRBJ2-2 (16 kb); TRBJ2-2P (17 kb); TRBJ2-3 (17 kb); TRBJ2-4 (17 kb); PRSS1 (17 kb); TRBJ2-5 (17 kb); TRBJ2-6 (17 kb); TRBJ2-7 (17 kb); TRBC2 (21 kb); TRBV29-1 (29 kb); TRBV30 (32 kb); PGBD4P1 (47 kb); TRBV28 (49 kb)	-0.312803	-0.201632	9.007	0.655805	0.327 Pancreatitis	C7orf34 | ENST00000390397 | ENST00000390401 | ENST00000390418 | ENST00000390419 | EPHB6 | PRSS1 | PRSS3P1 | PRSS3P2 | TRBV19 | TRBV24-1 | TRBV28 | TRBV29-1 | U66060.1-19 | U66060.1-23 | U66061.1-11 | unnamed		ACP vs. all controls	1.67476	1.49-1.9	17.0993	1.71116	1.47-2	11.0543	1.81127	1.56-2.1	13.7055
rs16851653	1	15779113	A	G	0.136	0	0.918	rs545634	0.841712	FALSE	CTRC (3.4 kb, near_gene/Downstream gene/MODIFIER); CELA2A (4.1 kb, near_gene/Upstream gene/MODIFIER); CELA2B (13 kb); EFHD2 (22 kb); CASP9 (38 kb)	-0.875726	-0.174595	0.192	0.423383	NA	AGMAT | C1orf64 | CASP9 | CELA2A | CELA2B | CLCNKA | CTRC | DDI2 | DNAJC16 | EFHD2 | HSPB7 | NECAP2 | PLEKHM2 | RP11-288I21.1 | RP11-5P18.10 | RP11-5P18.5 | RSC1A1 | SLC25A34		ACP vs. all controls	1.67112	1.49-1.9	17.0195	1.52369	1.32-1.8	6.59993	1.78987	1.54-2.1	11.386
rs147767607	7	142477777	C	T	0.2828	0	0.599	rs147767607	1	TRUE	PRSS3P2 (0.29 kb, near_gene/Upstream gene/MODIFIER); PRSS3P1 (6 kb); WBP1LP1 (8.7 kb); TRBJ2-1 (16 kb); TRBJ2-2 (16 kb); TRBJ2-2P (17 kb); TRBJ2-3 (17 kb); PRSS1 (17 kb); TRBJ2-4 (17 kb); TRBJ2-5 (17 kb); TRBJ2-6 (17 kb); TRBJ2-7 (17 kb); TRBC2 (21 kb); TRBV29-1 (29 kb); TRBV30 (32 kb); PGBD4P1 (47 kb); TRBV28 (49 kb)	-0.376326	-0.215991	7.778	0.575769	0.369 Pancreatitis	C7orf34 | ENST00000390397 | ENST00000390401 | ENST00000390418 | ENST00000390419 | EPHB6 | PRSS1 | PRSS3P1 | PRSS3P2 | TRBV19 | TRBV24-1 | TRBV28 | TRBV29-1 | U66060.1-19 | U66060.1-23 | U66061.1-11 | unnamed		ACP vs. all controls	1.7258	1.53-1.94	16.8815	1.778	1.52-2.08	11.2432	1.7808	1.53-2.08	11.7947
rs1285582	23	106367102	G	A	0.4152	0	0.85	rs1285582	1	TRUE	NUP62CL (0 kb, 3'utr/3 prime UTR/MODIFIER | intron/NMD transcript/MODIFIER | near_gene/Downstream gene/MODIFIER)					NA			ACP vs. all controls	1.91878	1.66-2.21	16.7103	2.24011	1.83-2.75	12.7486	1.91352	1.61-2.27	11.893
rs183098386	7	142486044	T	C	0.1426	0	0.568	rs192514996	0.95354	FALSE	WBP1LP1 (0.41 kb, near_gene/Downstream gene/MODIFIER); PRSS3P2 (3.6 kb, near_gene/Downstream gene/MODIFIER); TRBJ2-1 (8 kb); TRBJ2-2 (8.2 kb); TRBJ2-2P (8.3 kb); TRBJ2-3 (8.5 kb); TRBJ2-4 (8.6 kb); TRBJ2-5 (8.8 kb); TRBJ2-6 (8.9 kb); TRBJ2-7 (9.1 kb); TRBC2 (13 kb); PRSS3P1 (14 kb); TRBV30 (24 kb); PRSS1 (25 kb); TRBV29-1 (37 kb)	-0.485066	-0.237933	6.538	0.175374	0.215 Pancreatitis	C7orf34 | ENST00000390397 | ENST00000390401 | ENST00000390418 | ENST00000390419 | EPHB6 | PRSS3P1 | PRSS3P2 | TRBV19 | TRBV24-1 | TRBV28 | TRBV29-1 | U66060.1-19 | U66060.1-23 | U66061.1-11 | unnamed		ACP vs. all controls	2.1208	1.8-2.5	16.5671	2.112	1.71-2.61	10.2541	2.3099	1.87-2.85	13.3401
rs1285577	23	106409812	C	G	0.4175	0	0.857	rs1285582	0.990368	FALSE	NUP62CL (0 kb, intron/NMD transcript/MODIFIER | intron/Intron/MODIFIER)					NA			ACP vs. all controls	1.90716	1.66-2.2	16.502	2.20849	1.8-2.7	12.5102	1.89723	1.6-2.25	11.7006
rs1285715	23	106308416	G	T	0.4151	0	0.859	rs1285582	0.98951	FALSE	RBM41 (0 kb, 3'utr/3 prime UTR/MODIFIER | near_gene/Downstream gene/MODIFIER)					NA			ACP vs. all controls	1.89503	1.64-2.18	16.1934	2.1836	1.78-2.67	12.132	1.90827	1.61-2.27	11.8999
rs12562037	1	15782520	C	T	0.1376	0	0.945	rs12562037	1	TRUE	CELA2A (0.7 kb, near_gene/Upstream gene/MODIFIER); CTRC (6.8 kb); CELA2B (9.9 kb); EFHD2 (26 kb); CASP9 (35 kb)	-0.491417	0.430841	0.182	0.231159	NA	AGMAT | C1orf64 | CASP9 | CELA2A | CLCNKA | CTRC | DDI2 | DNAJC16 | EFHD2 | HSPB7 | NECAP2 | PLEKHM2 | RP11-288I21.1 | RP11-5P18.10 | RP11-5P18.5 | RSC1A1 | SLC25A34 | unnamed		ACP vs. all controls	1.63265	1.47-1.8	15.956	1.50353	1.3-1.8	6.43615	1.80115	1.54-2.1	11.8079
rs10243591	7	142433574	T	C	0.3571	0	0.971	rs10243591	1	TRUE	PGBD4P1 (3 kb, near_gene/Downstream gene/MODIFIER); TRBV28 (4.6 kb, near_gene/Downstream gene/MODIFIER); TRBV27 (9.9 kb); TRBVB (14 kb); TRBV29-1 (14 kb); PRSS1 (24 kb); TRBV26 (30 kb); PRSS3P1 (35 kb); TRBVA (44 kb); PRSS3P2 (44 kb)	-0.707512	-0.260345	2.485	0.226412	0.467 Pancreatitis	C7orf34 | ENST00000390388 | ENST00000390397 | ENST00000390401 | ENST00000390418 | ENST00000390419 | EPHB6 | OR9A2 | PGBD4P1 | PRSS1 | PRSS3P1 | PRSS3P2 | RP5-894A10.2 | TRBV19 | TRBV21-1 | TRBV24-1 | TRBV25-1 | TRBV27 | TRBV28 | TRBV29-1 | TRBV7-8 | U66060.1-19 | U66060.1-21 | U66060.1-23 | U66061.1-11 | unnamed		ACP vs. all controls	1.46628	1.35-1.6	15.9321	1.37476	1.22-1.5	6.64016	1.59008	1.43-1.8	13.9855
rs10259155	7	142433997	G	A	0.3567	0	0.973	rs10243591	0.999813	FALSE	PGBD4P1 (3.4 kb, near_gene/Downstream gene/MODIFIER); TRBV28 (5 kb); TRBV27 (10 kb); TRBV29-1 (14 kb); TRBVB (14 kb); PRSS1 (23 kb); TRBV26 (30 kb); PRSS3P1 (34 kb); PRSS3P2 (44 kb); TRBVA (44 kb)	-0.665424	-0.265622	1.509	0.320843	0.467 Pancreatitis	C7orf34 | ENST00000390388 | ENST00000390397 | ENST00000390401 | ENST00000390418 | ENST00000390419 | EPHB6 | OR9A2 | PGBD4P1 | PRSS1 | PRSS3P1 | PRSS3P2 | RP5-894A10.2 | TRBV19 | TRBV21-1 | TRBV24-1 | TRBV25-1 | TRBV27 | TRBV28 | TRBV29-1 | TRBV7-8 | U66060.1-19 | U66060.1-21 | U66060.1-23 | U66061.1-11 | unnamed		ACP vs. all controls	1.46606	1.35-1.6	15.9205	1.37552	1.22-1.5	6.66097	1.59033	1.43-1.8	13.9945
rs6951271	7	142434446	C	A	0.3557	0	0.976	rs10243591	0.997287	FALSE	PGBD4P1 (3.9 kb, near_gene/Downstream gene/MODIFIER); TRBV28 (5.5 kb); TRBV27 (11 kb); TRBV29-1 (14 kb); TRBVB (15 kb); PRSS1 (23 kb); TRBV26 (30 kb); PRSS3P1 (34 kb); PRSS3P2 (44 kb); TRBVA (45 kb)	-0.616713	-0.263045	1.252	0.686541	0.467 Pancreatitis	C7orf34 | ENST00000390388 | ENST00000390397 | ENST00000390401 | ENST00000390418 | ENST00000390419 | EPHB6 | OR9A2 | PGBD4P1 | PRSS1 | PRSS3P1 | PRSS3P2 | RP5-894A10.2 | TRBV19 | TRBV21-1 | TRBV24-1 | TRBV25-1 | TRBV27 | TRBV28 | TRBV29-1 | TRBV7-8 | U66060.1-19 | U66060.1-21 | U66060.1-23 | U66061.1-11 | unnamed		ACP vs. all controls	1.463	1.34-1.59	15.8247	1.3748	1.23-1.54	6.66197	1.5888	1.42-1.78	13.9854
rs28797268	7	142434054	G	A	0.3564	0	0.974	rs10243591	0.998772	FALSE	PGBD4P1 (3.5 kb, near_gene/Downstream gene/MODIFIER); TRBV28 (5.1 kb); TRBV27 (10 kb); TRBV29-1 (14 kb); TRBVB (14 kb); PRSS1 (23 kb); TRBV26 (30 kb); PRSS3P1 (34 kb); PRSS3P2 (44 kb); TRBVA (44 kb)	-0.675796	-0.270609	1.294	0.319644	0.467 Pancreatitis	C7orf34 | ENST00000390388 | ENST00000390397 | ENST00000390401 | ENST00000390418 | ENST00000390419 | EPHB6 | OR9A2 | PGBD4P1 | PRSS1 | PRSS3P1 | PRSS3P2 | RP5-894A10.2 | TRBV19 | TRBV21-1 | TRBV24-1 | TRBV25-1 | TRBV27 | TRBV28 | TRBV29-1 | TRBV7-8 | U66060.1-19 | U66060.1-21 | U66060.1-23 | U66061.1-11 | unnamed		ACP vs. all controls	1.46391	1.35-1.6	15.805	1.37268	1.22-1.5	6.58315	1.59008	1.43-1.8	14.0313
rs12539868	7	142483028	C	T	0.2234	0	0.581	rs12539868	1	TRUE	PRSS3P2 (0.61 kb, near_gene/Downstream gene/MODIFIER); WBP1LP1 (3.4 kb, near_gene/Downstream gene/MODIFIER); TRBJ2-1 (11 kb); TRBJ2-2 (11 kb); PRSS3P1 (11 kb); TRBJ2-2P (11 kb); TRBJ2-3 (12 kb); TRBJ2-4 (12 kb); TRBJ2-5 (12 kb); TRBJ2-6 (12 kb); TRBJ2-7 (12 kb); TRBC2 (16 kb); PRSS1 (22 kb); TRBV30 (27 kb); TRBV29-1 (34 kb)	-0.584597	-0.247827	5.549	0.42081	0.317 Pancreatitis	C7orf34 | ENST00000390397 | ENST00000390401 | ENST00000390418 | ENST00000390419 | EPHB6 | PRSS1 | PRSS3P1 | PRSS3P2 | TRBV19 | TRBV24-1 | TRBV28 | TRBV29-1 | U66060.1-19 | U66060.1-23 | U66061.1-11 | unnamed		ACP vs. all controls	1.8063	1.58-2.06	15.7799	1.9844	1.66-2.37	12.3511	1.9188	1.61-2.28	11.9116
rs74054722	1	15782074	C	T	0.1408	0	0.917	rs12562037	0.892297	FALSE	CELA2A (1.1 kb, near_gene/Upstream gene/MODIFIER); CTRC (6.3 kb); CELA2B (10 kb); EFHD2 (25 kb); CASP9 (35 kb)	-0.330782	0.0334928	0.794	0.331027	NA	AGMAT | CASP9 | CELA2A | CELA2B | CTRC | DNAJC16 | PLEKHM2 | RP11-288I21.1 | RSC1A1		ACP vs. all controls	1.62417	1.45-1.8	15.5827	1.49768	1.28-1.8	6.26563	1.71615	1.47-2	10.2759
rs4725602	7	142476441	G	T	0.4128	0	0.592	rs4725602	1	TRUE	PRSS3P2 (1.6 kb, near_gene/Upstream gene/MODIFIER); PRSS3P1 (4.6 kb, near_gene/Downstream gene/MODIFIER); WBP1LP1 (10 kb); PRSS1 (16 kb); TRBJ2-1 (18 kb); TRBJ2-2 (18 kb); TRBJ2-2P (18 kb); TRBJ2-3 (18 kb); TRBJ2-4 (18 kb); TRBJ2-5 (18 kb); TRBJ2-6 (18 kb); TRBJ2-7 (19 kb); TRBC2 (22 kb); TRBV29-1 (28 kb); TRBV30 (34 kb); PGBD4P1 (46 kb); TRBV28 (47 kb)	-0.256422	-0.198096	8.037	0.238095	0.233 Pancreatitis	C7orf34 | ENST00000390397 | ENST00000390401 | ENST00000390418 | ENST00000390419 | EPHB6 | PRSS3P1 | PRSS3P2 | TRBV19 | TRBV24-1 | TRBV28 | TRBV29-1 | U66060.1-19 | U66060.1-23 | U66061.1-11 | unnamed		ACP vs. all controls	1.59821	1.43-1.8	15.4973	1.57953	1.37-1.8	8.77359	1.69147	1.47-2	11.2852
chr7:142478368:I	7	142478368	C	CTTAG	0.2386	0	0.599	chr7:142478368:I	1	TRUE	PRSS3P2 (0 kb, intron/Intron/MODIFIER | nc-RNA/Non coding transcript/MODIFIER | near_gene/Upstream gene/MODIFIER); PRSS3P1 (6.6 kb); WBP1LP1 (8.1 kb); TRBJ2-1 (16 kb); TRBJ2-2 (16 kb); TRBJ2-2P (16 kb); TRBJ2-3 (16 kb); TRBJ2-4 (16 kb); TRBJ2-5 (16 kb); TRBJ2-6 (17 kb); TRBJ2-7 (17 kb); PRSS1 (17 kb); TRBC2 (20 kb); TRBV29-1 (30 kb); TRBV30 (32 kb); PGBD4P1 (48 kb); TRBV28 (49 kb)			9.77		0.365 Pancreatitis	C7orf34 | ENST00000390397 | ENST00000390401 | ENST00000390418 | ENST00000390419 | EPHB6 | PRSS1 | PRSS3P1 | PRSS3P2 | TRBV19 | TRBV24-1 | TRBV28 | TRBV29-1 | U66060.1-19 | U66060.1-23 | U66061.1-11 | unnamed		ACP vs. all controls	1.7427	1.54-1.98	15.4538	1.7898	1.52-2.11	10.3605	1.9602	1.66-2.31	14.0917
rs6622126	23	106200202	A	G	0.4616	2	1	rs6622126	1	TRUE	MORC4 (0 kb, exon/Missense/MODERATE | intron/Intron/MODIFIER)					0.507 Pancreatitis			ACP vs. all controls	1.73907	1.54-2	15.1205	1.82516	1.52-2.2	8.84842	1.71188	1.47-2	10.1878
rs1426860	23	105914878	A	T	0.2383	0	0.765	rs66491909	0.809596	FALSE	CXorf57 (0 kb, intron/Intron/MODIFIER | near_gene/Downstream gene/MODIFIER)					0.955 Pancreatitis		CDIPT | PDGFD	ACP vs. all controls	2.03558	1.72-2.4	15.0641	2.51713	1.96-3.2	11.1514	2.06316	1.69-2.5	10.8013
rs6622123	23	106194435	T	G	0.4629	0	0.997	rs6622126	0.994228	FALSE	MORC4 (0 kb, intron/Intron/MODIFIER)					0.507 Pancreatitis			ACP vs. all controls	1.73678	1.54-2	15.0524	1.82418	1.52-2.2	8.83376	1.70562	1.47-2	10.0592
rs2296808	23	106180396	G	C	0.4631	0	0.996	rs6622126	0.993764	FALSE	MORC4 (0 kb, intron/Intron/MODIFIER | near_gene/Downstream gene/MODIFIER); MORC4 (3.6 kb, intron/Intron/MODIFIER | near_gene/Downstream gene/MODIFIER)					0.507 Pancreatitis			ACP vs. all controls	1.73541	1.54-2	15.0116	1.81681	1.52-2.2	8.72436	1.70562	1.47-2	10.0592
rs6418248	23	106203829	T	C	0.4622	0	0.995	rs6622126	0.992741	FALSE	MORC4 (0 kb, intron/Intron/MODIFIER)					0.507 Pancreatitis			ACP vs. all controls	1.7345	1.54-2	14.8973	1.82122	1.52-2.2	8.75557	1.7034	1.45-2	9.96677
rs5917027	23	106162634	C	T	0.4646	0	0.987	rs6622126	0.988511	FALSE	MORC4 (0 kb, intron/Intron/MODIFIER); CLDN2 (0 kb, intron/Intron/MODIFIER | near_gene/Upstream gene/MODIFIER)					0.507 Pancreatitis			ACP vs. all controls	1.73581	1.53-1.97	14.8494	1.82277	1.51-2.19	8.71025	1.70903	1.46-2	10.0349
rs11520897	7	142497082	T	A	0.4444	0	0.976	rs2734221	0.832393	FALSE	TRBC2 (1.6 kb, near_gene/Upstream gene/MODIFIER); TRBJ2-7 (1.9 kb, near_gene/Downstream gene/MODIFIER); TRBJ2-6 (2.1 kb, near_gene/Downstream gene/MODIFIER); TRBJ2-5 (2.2 kb, near_gene/Downstream gene/MODIFIER); TRBJ2-4 (2.4 kb, near_gene/Downstream gene/MODIFIER); TRBJ2-3 (2.5 kb, near_gene/Downstream gene/MODIFIER); TRBJ2-2P (2.7 kb, near_gene/Downstream gene/MODIFIER); TRBJ2-2 (2.8 kb, near_ge…	-0.0319242	-0.0942702	2.091	0.803173	0.476 Pancreatitis	AC099548.6 | C7orf34 | C7ORF34 | CTAGE15P | CTAGE6P | ENST00000390392 | ENST00000390397 | ENST00000390401 | ENST00000390418 | ENST00000390419 | EPHA1 | EPHB6 | FAM115C | KEL | LOC154761 | PRSS1 | PRSS3P1 | PRSS3P2 | TRBV19 | TRBV21-1 | TRBV24-1 | TRBV28 | TRBV29-1 | TRBV30 | TRPV6 | U66060.1-19 | U66060.1-23 | U66061.1-11 | unnamed		ACP vs. all controls	1.41383	1.3-1.5	14.6744	1.43	1.28-1.6	9.08645	1.55255	1.39-1.7	13.761
rs56352733	7	142495308	A	G	0.4555	0	0.954	rs2734221	0.818365	FALSE	TRBJ2-7 (0.12 kb, near_gene/Downstream gene/MODIFIER); TRBJ2-6 (0.33 kb, near_gene/Downstream gene/MODIFIER); TRBJ2-5 (0.46 kb, near_gene/Downstream gene/MODIFIER); TRBJ2-4 (0.58 kb, near_gene/Downstream gene/MODIFIER); TRBJ2-3 (0.73 kb, near_gene/Downstream gene/MODIFIER); TRBJ2-2P (0.88 kb, near_gene/Downstream gene/MODIFIER); TRBJ2-2 (1 kb, near_gene/Downstream gene/MODIFIER); TRBJ2-1 (1.2 kb,…	-0.148605	1.81331	6.258	0.581732	0.478 Pancreatitis	C7orf34 | ENST00000390397 | ENST00000390401 | ENST00000390418 | ENST00000390419 | EPHB6 | PRSS1 | PRSS3P1 | PRSS3P2 | TRBV19 | TRBV21-1 | TRBV24-1 | TRBV28 | TRBV29-1 | U66060.1-19 | U66060.1-23 | U66061.1-11 | unnamed		ACP vs. all controls	1.41703	1.3-1.5	14.654	1.41563	1.27-1.6	8.56133	1.54967	1.39-1.7	13.4668
rs58649169	7	142479940	T	C	0.3137	0	0.605	rs58649169	1	TRUE	PRSS3P2 (0 kb, nc-exon/Non coding transcript exon/MODIFIER | nc-RNA/Non coding transcript/MODIFIER | near_gene/Upstream gene/MODIFIER); WBP1LP1 (6.5 kb); PRSS3P1 (8.1 kb); TRBJ2-1 (14 kb); TRBJ2-2 (14 kb); TRBJ2-2P (14 kb); TRBJ2-3 (15 kb); TRBJ2-4 (15 kb); TRBJ2-5 (15 kb); TRBJ2-6 (15 kb); TRBJ2-7 (15 kb); TRBC2 (19 kb); PRSS1 (19 kb); TRBV30 (30 kb); TRBV29-1 (31 kb); PGBD4P1 (49 kb)	-0.0941818	-0.156148	7.78	0.411465	0.402 Pancreatitis	C7orf34 | ENST00000390397 | ENST00000390401 | ENST00000390418 | ENST00000390419 | EPHB6 | PRSS1 | PRSS3P1 | PRSS3P2 | TRBV19 | TRBV24-1 | TRBV28 | TRBV29-1 | U66060.1-19 | U66060.1-23 | U66061.1-11 | unnamed		ACP vs. all controls	1.62048	1.45-1.8	14.4975	1.68606	1.45-2	10.1868	1.71585	1.47-2	10.9289
rs146437551	5	147188023	G	T	0.0134	0	0.924	rs146437551	1	TRUE	SPINK1 (16 kb); JAKMIP2 (26 kb); SCGB3A2 (62 kb); C5orf46 (72 kb)	-0.175052	-0.192258	9.557	0.860956	NA			ACP vs. all controls	3.81679	2.78-5.3	14.4766	3.82263	2.38-6.2	6.9357	3.37952	2.13-5.6	5.92695
rs145092089	5	147186233	G	T	0.0134	0	0.918	rs146437551	0.999951	FALSE	SPINK1 (18 kb); JAKMIP2 (24 kb); SCGB3A2 (64 kb); C5orf46 (74 kb)	-0.19077	-0.196237	2.687	0.586221	NA			ACP vs. all controls	3.8373	2.78-5.3	14.4667	3.84468	2.38-6.2	6.93719	3.39213	2.13-5.6	5.91981
rs140226647	5	147187231	C	T	0.0134	0	0.92	rs146437551	0.99998	FALSE	SPINK1 (17 kb); JAKMIP2 (25 kb); SCGB3A2 (63 kb); C5orf46 (73 kb)	-0.162993	-0.187176	6.345	0.839171	NA			ACP vs. all controls	3.82995	2.78-5.3	14.4617	3.8373	2.38-6.2	6.94016	3.38868	2.13-5.6	5.92414
rs73247968	23	106155095	A	C	0.1985	0	0.865	rs12014762	0.900652	FALSE	MORC4 (0 kb, intron/Intron/MODIFIER); CLDN2 (0 kb, intron/Intron/MODIFIER)					0.592 Pancreatitis		CDIPT | PDGFD	ACP vs. all controls	1.99439	1.69-2.3	14.451	2.32731	1.82-3	9.53694	1.89883	1.56-2.3	8.77492
rs17107287	5	147192954	T	C	0.0123	0	0.966	rs146437551	0.958934	FALSE	SPINK1 (11 kb); JAKMIP2 (31 kb); SCGB3A2 (57 kb); C5orf46 (67 kb)	-0.236883	-0.215606	5.559	0.754729	NA			ACP vs. all controls	3.84172	2.78-5.3	14.4056	3.97614	2.44-6.2	7.12044	3.31126	2.08-5.3	5.74552
rs6622124	23	106197300	T	C	0.4539	0	0.985	rs6622126	0.968562	FALSE	MORC4 (0 kb, intron/Intron/MODIFIER)					0.51 Pancreatitis			ACP vs. all controls	1.71726	1.52-2	14.3905	1.78969	1.49-2.2	8.22746	1.68575	1.45-2	9.56348
rs6622129	23	106222718	G	A	0.4633	0	0.989	rs6622126	0.988297	FALSE	MORC4 (0 kb, intron/Intron/MODIFIER)					0.51 Pancreatitis			ACP vs. all controls	1.71726	1.52-2	14.3905	1.81436	1.52-2.2	8.62052	1.68531	1.45-2	9.55467
rs192858015	5	147194603	A	G	0.0123	0	0.967	rs146437551	0.958058	FALSE	SPINK1 (9.5 kb); JAKMIP2 (32 kb); SCGB3A2 (56 kb); C5orf46 (66 kb)	-0.378467	-0.231421	0.896	0.266943	NA			ACP vs. all controls	3.83142	2.78-5.3	14.3849	3.96511	2.44-6.2	7.10498	3.29815	2.04-5.3	5.7242
rs17107294	5	147194243	G	T	0.0123	0	0.967	rs146437551	0.958259	FALSE	SPINK1 (9.9 kb); JAKMIP2 (32 kb); SCGB3A2 (56 kb); C5orf46 (66 kb)	-0.461176	-0.130706	0.765	0.691905	NA			ACP vs. all controls	3.83436	2.78-5.3	14.3836	3.96668	2.44-6.2	7.10871	3.30142	2.04-5.3	5.72845
chrX:106207121:D	23	106207121	A	AC	0.4581	0	0.972	rs6622126	0.981484	FALSE						0.48 Pancreatitis			ACP vs. all controls	1.72539	1.52-2	14.3771	1.83159	1.52-2.2	8.70393	1.69014	1.45-2	9.51847
rs6616616	23	106206508	C	A	0.4633	0	0.989	rs6622126	0.988519	FALSE	MORC4 (0 kb, intron/Intron/MODIFIER)					0.51 Pancreatitis			ACP vs. all controls	1.71591	1.52-2	14.351	1.8129	1.52-2.2	8.59899	1.68444	1.45-2	9.53706
rs1927310	23	106206578	G	A	0.4633	0	0.989	rs6622126	0.988519	FALSE	MORC4 (0 kb, intron/Intron/MODIFIER)					0.51 Pancreatitis			ACP vs. all controls	1.71591	1.52-2	14.351	1.8129	1.52-2.2	8.59899	1.68444	1.45-2	9.53706
rs143614477	23	106214355	C	T	0.4633	0	0.989	rs6622126	0.988464	FALSE	MORC4 (0 kb, intron/Intron/MODIFIER)					0.507 Pancreatitis			ACP vs. all controls	1.71591	1.52-2	14.351	1.8129	1.52-2.2	8.59899	1.68444	1.45-2	9.53706
rs148916504	7	142478599	G	C	0.2798	0	0.604	rs148916504	1	TRUE	PRSS3P2 (0 kb, intron/Intron/MODIFIER | nc-RNA/Non coding transcript/MODIFIER | near_gene/Upstream gene/MODIFIER); PRSS3P1 (6.8 kb); WBP1LP1 (7.9 kb); TRBJ2-1 (15 kb); TRBJ2-2 (16 kb); TRBJ2-2P (16 kb); TRBJ2-3 (16 kb); TRBJ2-4 (16 kb); TRBJ2-5 (16 kb); TRBJ2-6 (16 kb); TRBJ2-7 (17 kb); PRSS1 (18 kb); TRBC2 (20 kb); TRBV29-1 (30 kb); TRBV30 (32 kb); PGBD4P1 (48 kb); TRBV28 (50 kb)	-0.397513	-0.214477	0.732	0.238894	0.387 Pancreatitis	C7orf34 | ENST00000390397 | ENST00000390401 | ENST00000390418 | ENST00000390419 | EPHB6 | PRSS1 | PRSS3P1 | PRSS3P2 | TRBV19 | TRBV24-1 | TRBV28 | TRBV29-1 | U66060.1-19 | U66060.1-23 | U66061.1-11 | unnamed		ACP vs. all controls	1.6412	1.46-1.84	14.3241	1.817	1.56-2.12	12.223	1.677	1.44-1.96	9.65568
rs2209814	23	106207122	A	C	0.4575	0	0.974	rs6622126	0.981664	FALSE	MORC4 (0 kb, intron/Intron/MODIFIER)					0.484 Pancreatitis			ACP vs. all controls	1.72313	1.52-2	14.3118	1.82912	1.52-2.2	8.6681	1.68926	1.45-2	9.501
rs145479930	5	147199012	C	A	0.0123	0	0.971	rs146437551	0.955279	FALSE	SPINK1 (5.1 kb); JAKMIP2 (37 kb); SCGB3A2 (51 kb); C5orf46 (61 kb)	-0.12463	-0.113991	1.13	0.420109	NA			ACP vs. all controls	3.80228	2.78-5.3	14.2976	3.93391	2.44-6.2	7.07863	3.26052	2.04-5.3	5.66798
rs17107296	5	147198414	C	A	0.0123	0	0.97	rs146437551	0.955498	FALSE	SPINK1 (5.7 kb); JAKMIP2 (36 kb); SCGB3A2 (52 kb); C5orf46 (62 kb)	-0.558234	-0.25879	0.05	0.689202	NA			ACP vs. all controls	3.80518	2.78-5.3	14.2962	3.93236	2.44-6.2	7.07493	3.26584	2.04-5.3	5.67777
rs6622121	23	106168101	T	C	0.4539	0	0.979	rs6622126	0.960841	FALSE	MORC4 (0 kb, intron/Intron/MODIFIER); CLDN2 (0 kb, intron/Intron/MODIFIER)					0.51 Pancreatitis			ACP vs. all controls	1.71907	1.52-2	14.2768	1.7792	1.47-2.1	8.04436	1.68882	1.45-2	9.58063
rs12008279	23	106160702	G	A	0.4671	2	1	rs12008279	1	TRUE	MORC4 (0 kb, intron/Intron/MODIFIER); CLDN2 (0 kb, intron/Intron/MODIFIER | near_gene/Upstream gene/MODIFIER)					0.453 Pancreatitis		CDIPT	ACP vs. all controls	1.70785	1.52-1.9	14.1978	1.85158	1.54-2.2	9.24287	1.68444	1.45-2	9.67177
rs145959667	5	147197530	A	G	0.0124	0	0.963	rs146437551	0.955925	FALSE	SPINK1 (6.6 kb); JAKMIP2 (35 kb); SCGB3A2 (53 kb); C5orf46 (63 kb)	-0.110655	-0.183575	1.574	0.63734	NA			ACP vs. all controls	3.78215	2.78-5.3	14.1738	3.94011	2.44-6.2	7.07749	3.24149	2.04-5.3	5.63041
rs149882377	5	147204875	T	C	0.0123	0	0.974	rs146437551	0.951281	FALSE	SPINK1 (0 kb, intron/Intron/MODIFIER | nc-RNA/Non coding transcript/MODIFIER | near_gene/Downstream gene/MODIFIER); JAKMIP2 (43 kb); SCGB3A2 (45 kb); C5orf46 (55 kb)	0.00765637	-0.174995	2.004	0.708121	NA			ACP vs. all controls	3.76506	2.78-5.3	14.1657	3.89712	2.44-6.2	7.03802	3.21543	2-5.3	5.599
rs17107315	5	147207678	C	T	0.0123	0	0.972	rs146437551	0.95106	FALSE	SPINK1 (0 kb, exon/Missense/MODERATE | nc-exon/Non coding transcript exon/MODIFIER | nc-RNA/Non coding transcript/MODIFIER); SCGB3A2 (43 kb); JAKMIP2 (45 kb); C5orf46 (53 kb)	-1.28996	-1.38472	0.001	0.170198	NA		FAM25B | FAM25C | FAM25G	ACP vs. all controls	3.76506	2.78-5.3	14.1657	3.90016	2.44-6.2	7.03475	3.21337	2-5.3	5.59348
rs6523906	23	106162724	A	G	0.4553	0	0.977	rs6622126	0.961188	FALSE	MORC4 (0 kb, intron/Intron/MODIFIER); CLDN2 (0 kb, intron/Intron/MODIFIER | near_gene/Upstream gene/MODIFIER)					0.51 Pancreatitis			ACP vs. all controls	1.71502	1.52-2	14.1596	1.78348	1.47-2.1	8.0748	1.68794	1.45-2	9.56303
rs76192346	5	147183902	G	A	0.0136	0	0.906	rs146437551	0.990058	FALSE	SPINK1 (20 kb); JAKMIP2 (22 kb); SCGB3A2 (66 kb); C5orf46 (76 kb)	-0.406801	-0.217968	1.279	0.642419	NA			ACP vs. all controls	3.77929	2.78-5.3	14.1586	3.79219	2.38-6.2	6.82453	3.35909	2.08-5.3	5.84785
rs17107316	5	147208894	C	T	0.0123	0	0.971	rs146437551	0.950946	FALSE	SPINK1 (0 kb, intron/Intron/MODIFIER | near_gene/Upstream gene/MODIFIER); SCGB3A2 (41 kb); JAKMIP2 (47 kb); C5orf46 (51 kb)	0.233147	-0.135751	4.168	0.492028	NA			ACP vs. all controls	3.76364	2.78-5.3	14.1581	3.90168	2.44-6.2	7.03842	3.21234	2-5.3	5.59073
rs17107318	5	147209230	G	A	0.0124	0	0.971	rs146437551	0.950913	FALSE	SPINK1 (0 kb, intron/Intron/MODIFIER | near_gene/Upstream gene/MODIFIER); SCGB3A2 (41 kb); JAKMIP2 (47 kb); C5orf46 (51 kb)	-0.0750698	-0.184524	1.633	0.577271	NA			ACP vs. all controls	3.76364	2.78-5.3	14.1415	3.90168	2.44-6.2	7.03842	3.21234	2-5.3	5.59073
rs148276928	5	147213230	C	T	0.0124	0	0.967	rs146437551	0.950491	FALSE	SPINK1 (1.9 kb, near_gene/Upstream gene/MODIFIER); SCGB3A2 (37 kb); C5orf46 (47 kb); JAKMIP2 (51 kb)	0.0963676	-0.157672	10.99	0.875674	NA			ACP vs. all controls	3.76364	2.78-5.3	14.1249	3.90778	2.44-6.2	7.03191	3.20924	2-5	5.57829
rs142703147	5	147215281	A	C	0.0124	0	0.965	rs146437551	0.950284	FALSE	SPINK1 (3.9 kb, near_gene/Upstream gene/MODIFIER); SCGB3A2 (35 kb); C5orf46 (45 kb); JAKMIP2 (53 kb)	1.48888	1.96471	9.723	0.624566	NA			ACP vs. all controls	3.76364	2.78-5.3	14.0918	3.91083	2.44-6.2	7.02868	3.20924	2-5	5.56994
rs148911734	5	147218371	T	C	0.0124	0	0.962	rs146437551	0.950009	FALSE	SPINK1 (7 kb); SCGB3A2 (32 kb); C5orf46 (42 kb); JAKMIP2 (56 kb)	-0.212431	-0.0708116	1.288	0.406564	NA			ACP vs. all controls	3.76506	2.78-5.3	14.0499	3.92003	2.44-6.2	7.02431	3.20718	2-5	5.55614
rs142684029	5	147219066	A	T	0.0124	0	0.961	rs146437551	0.949928	FALSE	SPINK1 (7.7 kb); SCGB3A2 (31 kb); C5orf46 (41 kb); JAKMIP2 (57 kb)	-0.198795	-0.202477	3.513	0.519747	NA			ACP vs. all controls	3.76506	2.78-5.3	14.0499	3.92157	2.44-6.2	7.02271	3.20616	2-5	5.54926
rs185660726	5	147222260	A	G	0.0124	0	0.956	rs146437551	0.949436	FALSE	SPINK1 (11 kb); SCGB3A2 (28 kb); C5orf46 (38 kb); JAKMIP2 (60 kb)	-0.433094	-0.235712	0.621	0.441462	NA			ACP vs. all controls	3.76648	2.78-5.3	13.9919	3.93082	2.44-6.2	7.01842	3.2041	2-5	5.53139
rs150261364	5	147223952	T	C	0.0124	0	0.953	rs146437551	0.948979	FALSE	SPINK1 (13 kb); SCGB3A2 (26 kb); C5orf46 (36 kb); JAKMIP2 (62 kb)	-0.658015	-0.263897	0.187	0.575862	NA			ACP vs. all controls	3.76648	2.78-5.3	13.943	3.93701	2.44-6.2	7.00688	3.20205	2-5	5.51772
rs142120065	5	147224635	A	G	0.0124	0	0.951	rs146437551	0.948732	FALSE	SPINK1 (13 kb); SCGB3A2 (26 kb); C5orf46 (36 kb); JAKMIP2 (62 kb)	-0.181398	-0.201589	1.893	0.566378	NA			ACP vs. all controls	3.76648	2.78-5.3	13.9268	3.94011	2.44-6.2	7.00375	3.20102	2-5	5.51089
rs142281266	5	147226225	C	T	0.0124	0	0.948	rs146437551	0.948056	FALSE	CTC-327F10.1 (5 kb, near_gene/Downstream gene/MODIFIER); SPINK1 (15 kb); SCGB3A2 (24 kb); C5orf46 (34 kb)	-0.256397	-0.199058	2.618	0.7615	NA			ACP vs. all controls	3.76506	2.7-5.3	13.8709	3.94789	2.44-6.2	6.99597	3.19693	2-5	5.48779
rs138376207	5	147229651	A	G	0.0125	0	0.941	rs146437551	0.94617	FALSE	CTC-327F10.1 (1.6 kb, near_gene/Downstream gene/MODIFIER); SPINK1 (18 kb); SCGB3A2 (21 kb); C5orf46 (31 kb)	-0.498961	-0.245373	0.318	0.393637	NA			ACP vs. all controls	3.77358	2.78-5.3	13.8351	3.96354	2.44-6.2	6.98581	3.19489	2-5	5.46613
rs142287495	5	147229262	T	G	0.0125	0	0.942	rs146437551	0.946731	FALSE	CTC-327F10.1 (1.9 kb, near_gene/Downstream gene/MODIFIER); SPINK1 (18 kb); SCGB3A2 (21 kb); C5orf46 (31 kb)	-0.199108	-0.197177	1.736	0.756708	NA			ACP vs. all controls	3.76223	2.7-5.3	13.7919	3.95883	2.44-6.2	6.98003	3.19183	2-5	5.45808
rs77658106	5	147189421	T	A	0.0146	0	0.904	rs146437551	0.941499	FALSE	SPINK1 (15 kb); JAKMIP2 (27 kb); SCGB3A2 (61 kb); C5orf46 (71 kb)	-0.202109	-0.187175	10.39	0.887694	NA			ACP vs. all controls	3.54736	2.63-4.8	13.7535	4.11015	2.56-6.7	7.57692	3.19081	2-5	5.74255
chr7:142478687:D	7	142478687	AGCCGAG	A	0.2559	0	0.6	chr7:142478687:D	1	TRUE	PRSS3P2 (0 kb); PRSS3P1 (6.9 kb); WBP1LP1 (7.8 kb); TRBJ2-1 (15 kb); TRBJ2-2 (16 kb); TRBJ2-2P (16 kb); TRBJ2-3 (16 kb); TRBJ2-4 (16 kb); TRBJ2-5 (16 kb); TRBJ2-6 (16 kb); TRBJ2-7 (16 kb); PRSS1 (18 kb); TRBC2 (20 kb); TRBV29-1 (30 kb); TRBV30 (32 kb); PGBD4P1 (48 kb); TRBV28 (50 kb)			10.13		0.34 Pancreatitis	C7orf34 | ENST00000390397 | ENST00000390401 | ENST00000390418 | ENST00000390419 | EPHB6 | PRSS1 | PRSS3P1 | PRSS3P2 | TRBV19 | TRBV24-1 | TRBV28 | TRBV29-1 | U66060.1-19 | U66060.1-23 | U66061.1-11 | unnamed		ACP vs. all controls	1.6517	1.46-1.86	13.7469	1.6666	1.42-1.96	8.48718	1.7346	1.48-2.03	10.3877
rs6622131	23	106239578	T	G	0.4534	0	0.974	rs6622126	0.962081	FALSE	MORC4 (0 kb, intron/Intron/MODIFIER | near_gene/Upstream gene/MODIFIER)					0.514 Pancreatitis			ACP vs. all controls	1.69763	1.49-1.9	13.659	1.77588	1.47-2.1	7.96584	1.66622	1.43-2	9.08763
rs12011768	23	106228074	G	C	0.4533	0	0.974	rs6622126	0.962147	FALSE	MORC4 (0 kb, intron/Intron/MODIFIER)					0.514 Pancreatitis			ACP vs. all controls	1.69719	1.49-1.9	13.6463	1.77541	1.47-2.1	7.95906	1.66579	1.43-2	9.07914
rs6622128	23	106217914	T	G	0.4535	0	0.976	rs6622126	0.961717	FALSE	MORC4 (0 kb, intron/Intron/MODIFIER)					0.51 Pancreatitis			ACP vs. all controls	1.6941	1.49-1.9	13.5577	1.77257	1.47-2.1	7.91848	1.6645	1.43-2	9.09568
chr7:142460744	7	142460744	C	G	0.4522	0	0.577	chr7:142460744	1	TRUE	PRSS1 (0 kb, exon/Missense/MODERATE | 3'utr/3 prime UTR/MODIFIER | nc-exon/Non coding transcript exon/MODIFIER | nc-RNA/Non coding transcript/MODIFIER | near_gene/Downstream gene/MODIFIER); PRSS3P1 (7.5 kb); TRBV29-1 (12 kb); PRSS3P2 (17 kb); WBP1LP1 (26 kb); PGBD4P1 (30 kb); TRBV28 (32 kb); TRBJ2-1 (33 kb); TRBJ2-2 (33 kb); TRBJ2-2P (34 kb); TRBJ2-3 (34 kb); TRBJ2-4 (34 kb); TRBJ2-5 (34 kb); TRB…	-0.241287	-0.313181	22.5	0.944935	NA	TRBV28		ACP vs. all controls	1.53586	1.39-1.7	13.5264	1.52625	1.33-1.8	7.54465	1.7671	1.54-2	13.4898
rs5917025	23	106119750	G	A	0.4987	0	0.934	rs12008279	0.845473	FALSE	MORC4 (0 kb, intron/Intron/MODIFIER); TBC1D8B (0.38 kb, near_gene/Downstream gene/MODIFIER)					0.373 Pancreatitis		CDIPT	ACP vs. all controls	1.71479	1.5-1.96	13.522	1.95273	1.61-2.36	10.2075	1.64429	1.4-1.93	8.30981
rs73742436	7	142478579	C	T	0.3811	0	0.575	rs73742436	1	TRUE	PRSS3P2 (0 kb, intron/Intron/MODIFIER | nc-RNA/Non coding transcript/MODIFIER | near_gene/Upstream gene/MODIFIER); PRSS3P1 (6.8 kb); WBP1LP1 (7.9 kb); TRBJ2-1 (15 kb); TRBJ2-2 (16 kb); TRBJ2-2P (16 kb); TRBJ2-3 (16 kb); TRBJ2-4 (16 kb); TRBJ2-5 (16 kb); TRBJ2-6 (16 kb); TRBJ2-7 (17 kb); PRSS1 (18 kb); TRBC2 (20 kb); TRBV29-1 (30 kb); TRBV30 (32 kb); PGBD4P1 (48 kb); TRBV28 (50 kb)	-0.0967922	-0.178394	7.658	0.525518	0.377 Pancreatitis	C7orf34 | ENST00000390397 | ENST00000390401 | ENST00000390418 | ENST00000390419 | EPHB6 | PRSS1 | PRSS3P1 | PRSS3P2 | TRBV19 | TRBV24-1 | TRBV28 | TRBV29-1 | U66060.1-19 | U66060.1-23 | U66061.1-11 | unnamed		ACP vs. all controls	1.56814	1.41-1.8	13.5187	1.69005	1.47-2	10.6356	1.62075	1.41-1.9	9.49308
rs6622130	23	106223274	G	T	0.4539	0	0.976	rs6622126	0.960418	FALSE	MORC4 (0 kb, intron/Intron/MODIFIER)					0.514 Pancreatitis			ACP vs. all controls	1.69233	1.49-1.9	13.5073	1.77305	1.47-2.1	7.92523	1.66107	1.43-2	9.02774
rs1937304	23	106077130	C	T	0.499	0	0.938	rs12008279	0.833769	FALSE	TBC1D8B (0 kb, intron/Intron/MODIFIER | near_gene/Downstream gene/MODIFIER); MORC4 (0 kb, intron/Intron/MODIFIER)					0.367 Pancreatitis		CDIPT	ACP vs. all controls	1.71322	1.5-1.95	13.4787	1.95049	1.61-2.36	10.2142	1.64019	1.4-1.93	8.23329
rs58874617	23	106207119	A	C	0.3751	0	0.808	rs6622126	0.829449	FALSE	MORC4 (0 kb, intron/Intron/MODIFIER)					0.32 Pancreatitis			ACP vs. all controls	1.80317	1.56-2.1	13.4678	1.87858	1.52-2.3	7.55329	1.78778	1.49-2.1	9.28148
rs12847061	23	106473891	T	C	0.0998	0	0.639	rs12847061	1	TRUE	PIH1D3 (0 kb, intron/Intron/MODIFIER)					NA		FGFBP2	ACP vs. all controls	2.72574	2.13-3.4	13.3554	2.73205	1.85-4	5.963	2.6124	1.92-3.6	8.15261
rs138251740	5	147234796	G	A	0.0125	0	0.909	rs146437551	0.935073	FALSE	CTC-327F10.1 (2.6 kb, near_gene/Upstream gene/MODIFIER); SCGB3A2 (15 kb); SPINK1 (23 kb); C5orf46 (25 kb)	-0.176475	0.0206681	1.134	0.541878	NA			ACP vs. all controls	3.74392	2.7-5.3	13.1882	4.01445	2.44-6.7	6.84319	3.18471	1.96-5.3	5.27404
rs2303195	1	15783222	T	C	0.1277	0	0.967	rs12562037	0.937877	FALSE	CELA2A (0.001 kb, near_gene/Upstream gene/MODIFIER); CTRC (7.5 kb); CELA2B (9.2 kb); EFHD2 (26 kb); CASP9 (34 kb)	-0.281907	0.17127	3.74	0.669708	0.219 Erectile dysfunction and prostate cancer treatment	AGMAT | CASP9 | CELA2A | CELA2B | CTRC | DNAJC16 | PLEKHM2 | RP11-288I21.1 | RSC1A1	CD97	ACP vs. all controls	1.56814	1.41-1.8	13.118	1.48898	1.28-1.7	5.97634	1.71116	1.47-2	9.77949
rs73247962	23	106075674	G	A	0.2003	0	0.876	rs12014762	0.853677	FALSE	TBC1D8B (0 kb, intron/Intron/MODIFIER | near_gene/Downstream gene/MODIFIER); MORC4 (0 kb, intron/Intron/MODIFIER)					0.579 Pancreatitis		CDIPT | PDGFD	ACP vs. all controls	1.91728	1.64-2.3	13.1118	2.26402	1.75-2.9	9.02145	1.83011	1.49-2.2	8.01281
rs1800907	7	142498109	C	T	0.4981	0	0.846	rs1800907	1	TRUE	TRBC2 (0.62 kb, near_gene/Upstream gene/MODIFIER); TRBJ2-7 (2.9 kb, near_gene/Downstream gene/MODIFIER); TRBJ2-6 (3.1 kb, near_gene/Downstream gene/MODIFIER); TRBJ2-5 (3.3 kb, near_gene/Downstream gene/MODIFIER); TRBJ2-4 (3.4 kb, near_gene/Downstream gene/MODIFIER); TRBJ2-3 (3.5 kb, near_gene/Downstream gene/MODIFIER); TRBJ2-2P (3.7 kb, near_gene/Downstream gene/MODIFIER); TRBJ2-2 (3.8 kb, near_g…	-0.172097	-0.0722831	0.798	0.558178	0.418 Pancreatitis	C7orf34 | CTAGE15P | ENST00000390397 | ENST00000390401 | ENST00000390418 | ENST00000390419 | EPHA1 | EPHB6 | FAM115C | LOC154761 | PRSS1 | PRSS3P1 | PRSS3P2 | TRBV19 | TRBV24-1 | TRBV28 | TRBV29-1 | TRBV30 | U66060.1-19 | U66060.1-23 | U66061.1-11 | unnamed		ACP vs. all controls	1.41343	1.3-1.5	13.1101	1.4041	1.25-1.6	7.34796	1.56006	1.39-1.8	12.5113
rs77180422	23	106479819	T	C	0.1015	0	0.631	rs12847061	0.982557	FALSE	PIH1D3 (0 kb, intron/Intron/MODIFIER)					NA		FGFBP2	ACP vs. all controls	2.62087	2.04-3.3	12.4639	2.57895	1.75-3.7	5.46345	2.55264	1.85-3.4	7.83188
rs34689332	23	106077517	A	G	0.099	0	0.848	rs34689332	1	TRUE	TBC1D8B (0 kb, intron/Intron/MODIFIER | near_gene/Downstream gene/MODIFIER); MORC4 (0 kb, intron/Intron/MODIFIER)					NA		FGFBP2	ACP vs. all controls	2.31317	1.85-2.9	12.4206	2.15628	1.56-3	4.85636	2.31317	1.75-3	8.10787
rs57586289	7	142496164	C	T	0.4984	0	0.996	rs57586289	1	TRUE	TRBJ2-7 (0.98 kb, near_gene/Downstream gene/MODIFIER); TRBJ2-6 (1.2 kb, near_gene/Downstream gene/MODIFIER); TRBJ2-5 (1.3 kb, near_gene/Downstream gene/MODIFIER); TRBJ2-4 (1.4 kb, near_gene/Downstream gene/MODIFIER); TRBJ2-3 (1.6 kb, near_gene/Downstream gene/MODIFIER); TRBJ2-2P (1.7 kb, near_gene/Downstream gene/MODIFIER); TRBJ2-2 (1.9 kb, near_gene/Downstream gene/MODIFIER); TRBJ2-1 (2.1 kb, ne…	0.0507899	0.807689	3.545	0.453378	0.451 Pancreatitis	C7orf34 | ENST00000390397 | ENST00000390401 | ENST00000390418 | ENST00000390419 | EPHB6 | PRSS1 | PRSS3P1 | PRSS3P2 | TRBV19 | TRBV21-1 | TRBV24-1 | TRBV28 | TRBV29-1 | U66060.1-19 | U66060.1-23 | U66061.1-11 | unnamed		ACP vs. all controls	1.3611	1.27-1.5	12.3456	1.3587	1.22-1.5	7.07971	1.46908	1.32-1.6	10.9927
rs12531368	7	142496230	T	A	0.4985	0	0.997	rs57586289	0.999984	FALSE	TRBJ2-7 (1 kb, near_gene/Downstream gene/MODIFIER); TRBJ2-6 (1.3 kb, near_gene/Downstream gene/MODIFIER); TRBJ2-5 (1.4 kb, near_gene/Downstream gene/MODIFIER); TRBJ2-4 (1.5 kb, near_gene/Downstream gene/MODIFIER); TRBJ2-3 (1.7 kb, near_gene/Downstream gene/MODIFIER); TRBJ2-2P (1.8 kb, near_gene/Downstream gene/MODIFIER); TRBJ2-2 (1.9 kb, near_gene/Downstream gene/MODIFIER); TRBJ2-1 (2.1 kb, near_…	-0.263549	0.73371	1.075	0.568064	0.451 Pancreatitis	C7orf34 | ENST00000390397 | ENST00000390401 | ENST00000390418 | ENST00000390419 | EPHB6 | PRSS1 | PRSS3P1 | PRSS3P2 | TRBV19 | TRBV21-1 | TRBV24-1 | TRBV28 | TRBV29-1 | U66060.1-19 | U66060.1-23 | U66061.1-11 | unnamed		ACP vs. all controls	1.36036	1.25-1.5	12.3047	1.35833	1.22-1.5	7.0683	1.46821	1.32-1.6	10.9614
rs12539089	7	142496293	A	C	0.4986	2	1	rs57586289	0.998696	FALSE	TRBJ2-7 (1.1 kb, near_gene/Downstream gene/MODIFIER); TRBJ2-6 (1.3 kb, near_gene/Downstream gene/MODIFIER); TRBJ2-5 (1.4 kb, near_gene/Downstream gene/MODIFIER); TRBJ2-4 (1.6 kb, near_gene/Downstream gene/MODIFIER); TRBJ2-3 (1.7 kb, near_gene/Downstream gene/MODIFIER); TRBJ2-2P (1.9 kb, near_gene/Downstream gene/MODIFIER); TRBJ2-2 (2 kb, near_gene/Downstream gene/MODIFIER); TRBJ2-1 (2.2 kb, near_…	0.198997	0.726863	7.243	0.45143	0.451 Pancreatitis	C7orf34 | ENST00000390397 | ENST00000390401 | ENST00000390418 | ENST00000390419 | EPHB6 | PRSS1 | PRSS3P1 | PRSS3P2 | TRBV19 | TRBV21-1 | TRBV24-1 | TRBV28 | TRBV29-1 | U66060.1-19 | U66060.1-23 | U66061.1-11 | unnamed		ACP vs. all controls	1.35465	1.25-1.5	12.047	1.35318	1.22-1.5	6.93301	1.46284	1.32-1.6	10.8041
rs62605968	23	106072527	T	C	0.4887	0	0.846	rs62605968	1	TRUE	TBC1D8B (0 kb, 3'utr/3 prime UTR/MODIFIER | intron/Intron/MODIFIER); MORC4 (0 kb, intron/Intron/MODIFIER)					0.29 Pancreatitis		CDIPT	ACP vs. all controls	1.70511	1.48-1.96	12.014	1.92682	1.58-2.35	8.9586	1.61061	1.36-1.91	7.01559
rs141052845	23	106207624	G	A	0.0769	0	0.622	rs141052845	1	TRUE	MORC4 (0 kb, intron/Intron/MODIFIER)					0.243 Pancreatitis		PDGFD	ACP vs. all controls	2.91806	2.22-3.8	11.7767	3.81023	2.44-5.9	7.41514	3.07248	2.13-4.3	8.41272
rs7795886	7	142484061	G	A	0.4322	0	0.595	rs7795886	1	TRUE	PRSS3P2 (1.6 kb, near_gene/Downstream gene/MODIFIER); WBP1LP1 (2.4 kb, near_gene/Downstream gene/MODIFIER); TRBJ2-1 (10 kb); TRBJ2-2 (10 kb); TRBJ2-2P (10 kb); TRBJ2-3 (10 kb); TRBJ2-4 (11 kb); TRBJ2-5 (11 kb); TRBJ2-6 (11 kb); TRBJ2-7 (11 kb); PRSS3P1 (12 kb); TRBC2 (15 kb); PRSS1 (23 kb); TRBV30 (26 kb); TRBV29-1 (35 kb)	-0.296649	-0.119548	7.497	0.391067	0.264 Pancreatitis	C7orf34 | ENST00000390397 | ENST00000390401 | ENST00000390418 | ENST00000390419 | EPHB6 | PRSS1 | PRSS3P1 | PRSS3P2 | TRBV19 | TRBV24-1 | TRBV28 | TRBV29-1 | U66060.1-19 | U66060.1-23 | U66061.1-11 | unnamed		ACP vs. all controls	1.4852	1.34-1.65	11.6492	1.5862	1.38-1.83	8.92342	1.5916	1.39-1.83	9.62379
rs79875267	23	106525867	T	C	0.1014	0	0.622	rs12847061	0.97613	FALSE						NA		FGFBP2	ACP vs. all controls	2.54451	2-3.2	11.6165	2.45366	1.67-3.6	4.96274	2.49491	1.82-3.4	7.43446
chr7:142481922:D	7	142481922	CCAA	C	0.2424	0	0.598	chr7:142481922:D	1	TRUE	PRSS3P2 (0 kb, intron/Intron/MODIFIER | nc-RNA/Non coding transcript/MODIFIER | near_gene/Downstream gene/MODIFIER); WBP1LP1 (4.5 kb, near_gene/Downstream gene/MODIFIER); PRSS3P1 (10 kb); TRBJ2-1 (12 kb); TRBJ2-2 (12 kb); TRBJ2-2P (12 kb); TRBJ2-3 (13 kb); TRBJ2-4 (13 kb); TRBJ2-5 (13 kb); TRBJ2-6 (13 kb); TRBJ2-7 (13 kb); TRBC2 (17 kb); PRSS1 (21 kb); TRBV30 (28 kb); TRBV29-1 (33 kb)			11.48		0.315 Pancreatitis	C7orf34 | ENST00000390397 | ENST00000390401 | ENST00000390418 | ENST00000390419 | EPHB6 | PRSS1 | PRSS3P1 | PRSS3P2 | TRBV19 | TRBV24-1 | TRBV28 | TRBV29-1 | U66060.1-19 | U66060.1-23 | U66061.1-11 | unnamed		ACP vs. all controls	1.5941	1.41-1.8	11.5858	1.6198	1.38-1.9	7.65615	1.7205	1.47-2.02	9.76177
rs149027430	23	106234670	C	T	0.0797	0	0.617	rs141052845	0.972883	FALSE	MORC4 (0 kb, intron/Intron/MODIFIER)					0.229 Pancreatitis		PDGFD	ACP vs. all controls	2.86012	2.17-3.8	11.5173	3.77038	2.44-5.9	7.48596	3.08111	2.17-4.3	8.55423
rs151170437	23	106421544	G	T	0.0816	0	0.566	rs141052845	0.883	FALSE	NUP62CL (0 kb, intron/NMD transcript/MODIFIER | intron/Intron/MODIFIER)					0.243 Pancreatitis		PDGFD	ACP vs. all controls	2.96141	2.22-4	11.4456	4.08122	2.56-6.7	7.7414	3.09522	2.13-4.5	8.13562
rs12857932	23	106278193	G	A	0.109	0	0.708	rs12847061	0.884008	FALSE	EEF1A1P40 (2.1 kb, near_gene/Downstream gene/MODIFIER)					0.204 Pancreatitis		FGFBP2	ACP vs. all controls	2.32377	1.85-2.9	11.3859	2.31107	1.64-3.2	5.14866	2.43076	1.82-3.2	8.27812
rs35750152	7	142497810	G	T	0.4435	0	0.853	rs57586289	0.835203	FALSE	TRBC2 (0.92 kb, near_gene/Upstream gene/MODIFIER); TRBJ2-7 (2.6 kb, near_gene/Downstream gene/MODIFIER); TRBJ2-6 (2.8 kb, near_gene/Downstream gene/MODIFIER); TRBJ2-5 (3 kb, near_gene/Downstream gene/MODIFIER); TRBJ2-4 (3.1 kb, near_gene/Downstream gene/MODIFIER); TRBJ2-3 (3.2 kb, near_gene/Downstream gene/MODIFIER); TRBJ2-2P (3.4 kb, near_gene/Downstream gene/MODIFIER); TRBJ2-2 (3.5 kb, near_gen…	-0.103725	-0.151047	3.077	0.558872	0.406 Pancreatitis	C7orf34 | ENST00000390397 | ENST00000390401 | ENST00000390418 | ENST00000390419 | EPHB6 | PRSS1 | PRSS3P1 | PRSS3P2 | TRBV19 | TRBV24-1 | TRBV28 | TRBV29-1 | U66060.1-19 | U66060.1-23 | U66061.1-11 | unnamed		ACP vs. all controls	1.3725	1.27-1.5	11.1475	1.35026	1.2-1.5	5.83354	1.5058	1.33-1.7	10.5109
rs144878061	1	15783296	G	C	0.0565	0	0.853	rs144878061	1	TRUE	CELA2A (0 kb, intron/Splice region/LOW | intron/Intron/MODIFIER | nc-RNA/Non coding transcript/MODIFIER); CTRC (7.6 kb); CELA2B (9.1 kb); EFHD2 (26 kb); CASP9 (34 kb)	0.643287	0.351808	9.853	0.687843	NA	AGMAT | CASP9 | CTRC | DNAJC16 | PLEKHM2 | RP11-288I21.1 | RSC1A1 | SLC25A34	CD97	ACP vs. all controls	1.84809	1.56-2.2	10.9937	1.85219	1.47-2.3	5.91264	2.00844	1.59-2.6	7.30154
rs12862207	23	106630657	T	C	0.1121	0	0.621	rs12847061	0.803106	FALSE						NA		FGFBP2	ACP vs. all controls	2.41192	1.89-3	10.95	2.68657	1.85-3.8	6.03833	2.23567	1.67-3	6.30362
rs187428826	23	106395209	A	G	0.0783	0	0.557	rs141052845	0.860133	FALSE	NUP62CL (0 kb, intron/NMD transcript/MODIFIER | intron/Intron/MODIFIER | near_gene/Downstream gene/MODIFIER)					0.219 Pancreatitis		PDGFD	ACP vs. all controls	2.96651	2.22-4	10.9194	4.08122	2.5-6.7	7.32907	3.17742	2.17-4.5	7.97971
rs150478410	23	106272870	A	G	0.0678	0	0.541	rs141052845	0.90847	FALSE	EEF1A1P40 (2.6 kb, near_gene/Upstream gene/MODIFIER)					0.22 Pancreatitis		PDGFD	ACP vs. all controls	3.2325	2.33-4.5	10.8642	4.36206	2.63-7.1	6.93602	3.43444	2.27-5.3	7.75095
rs80023216	23	106703715	A	G	0.0894	0	0.598	rs12847061	0.867777	FALSE						NA		FGFBP2	ACP vs. all controls	2.64565	2.04-3.4	10.6339	2.54045	1.69-3.8	4.61952	2.57481	1.82-3.6	6.66096
rs148771016	23	106561435	C	A	0.0838	0	0.542	rs148771016	1	TRUE						0.247 Pancreatitis		PDGFD	ACP vs. all controls	2.84374	2.13-3.8	10.422	4.43587	2.78-7.1	8.22986	2.95429	2.04-4.3	7.30299
rs10465287	23	105788360	T	A	0.2258	0	0.659	rs10465287	1	TRUE						0.93 Pancreatitis		CDIPT | PDGFD	ACP vs. all controls	1.90137	1.59-2.28	10.4078	2.47559	1.88-3.26	9.00263	1.82412	1.46-2.28	6.47121
rs17251	7	142423289	A	C	0.4201	2	1	rs17251	1	TRUE	TRBV27 (0 kb, intron/Intron/MODIFIER); TRBVB (3.5 kb, near_gene/Downstream gene/MODIFIER); TRBV28 (5.2 kb); PGBD4P1 (6.9 kb); TRBV26 (19 kb); TRBV29-1 (25 kb); TRBVA (34 kb); PRSS1 (34 kb); TRBV25-1 (44 kb); PRSS3P1 (45 kb)	0.073095	-0.147581	5.795	0.401562	0.234 Pancreatitis	C7orf34 | ENST00000390388 | ENST00000390397 | ENST00000390401 | ENST00000390418 | ENST00000390419 | EPHB6 | OR9A2 | PGBD4P1 | PRSS1 | PRSS3P1 | PRSS3P2 | RP5-894A10.2 | TRBV10-1 | TRBV10-2 | TRBV19 | TRBV21-1 | TRBV24-1 | TRBV25-1 | TRBV27 | TRBV28 | TRBV29-1 | TRBV4-2 | TRBV5-3 | TRBV7-3 | TRBV7-8 | TRBV8-2 | TRBV9 | U66060.1-19 | U66060.1-21 | U66060.1-23 | U66061.1-11 | unnamed		ACP vs. all controls	1.32135	1.22-1.4	10.2681	1.24549	1.12-1.4	3.984	1.40449	1.27-1.6	8.87838
rs10227218	7	142420983	G	A	0.419	0	0.991	rs17251	0.997349	FALSE	TRBVB (1.2 kb, near_gene/Downstream gene/MODIFIER); TRBV27 (2.2 kb, near_gene/Upstream gene/MODIFIER); TRBV28 (7.5 kb); PGBD4P1 (9.2 kb); TRBV26 (17 kb); TRBV29-1 (27 kb); TRBVA (31 kb); PRSS1 (36 kb); TRBV25-1 (42 kb); PRSS3P1 (47 kb)	-0.1833	-0.152111	4.458	0.345183	0.237 Pancreatitis	C7orf34 | ENST00000390349 | ENST00000390388 | ENST00000390397 | ENST00000390401 | ENST00000390418 | ENST00000390419 | EPHB6 | OR9A2 | PGBD4P1 | PRSS1 | PRSS3P1 | PRSS3P2 | RP5-894A10.2 | TRBV19 | TRBV21-1 | TRBV24-1 | TRBV25-1 | TRBV27 | TRBV28 | TRBV29-1 | TRBV7-3 | TRBV7-8 | TRBV8-2 | U66060.1-19 | U66060.1-21 | U66060.1-23 | U66061.1-11 | unnamed		ACP vs. all controls	1.32188	1.22-1.4	10.2477	1.24347	1.12-1.4	3.9077	1.4039	1.27-1.6	8.79775
rs379742	23	105493919	A	G	0.2217	0	0.662	rs10465287	0.872516	FALSE						1 Pancreatitis		CDIPT | PDGFD	ACP vs. all controls	1.89726	1.59-2.3	10.1771	2.52353	1.92-3.3	9.18806	1.80997	1.45-2.3	6.20153
rs4726573	7	142426954	T	C	0.4197	0	0.994	rs17251	0.998077	FALSE	TRBV28 (1.5 kb, near_gene/Upstream gene/MODIFIER); PGBD4P1 (3.2 kb, near_gene/Upstream gene/MODIFIER); TRBV27 (3.3 kb, near_gene/Downstream gene/MODIFIER); TRBVB (7.2 kb); TRBV29-1 (21 kb); TRBV26 (23 kb); PRSS1 (30 kb); TRBVA (37 kb); PRSS3P1 (41 kb); TRBV25-1 (48 kb)	-0.232389	-0.205372	2.696	0.341023	0.237 Pancreatitis	C7orf34 | ENST00000390388 | ENST00000390397 | ENST00000390401 | ENST00000390418 | ENST00000390419 | EPHB6 | OR9A2 | PGBD4P1 | PRSS1 | PRSS3P1 | PRSS3P2 | RP5-894A10.2 | TRBV19 | TRBV21-1 | TRBV24-1 | TRBV25-1 | TRBV27 | TRBV28 | TRBV29-1 | TRBV7-8 | U66060.1-19 | U66060.1-21 | U66060.1-23 | U66061.1-11 | unnamed		ACP vs. all controls	1.32048	1.22-1.4	10.1756	1.24363	1.12-1.4	3.92424	1.4039	1.27-1.6	8.82783
rs7788264	7	142419049	T	C	0.4184	0	0.99	rs17251	0.997069	FALSE	TRBVB (0.16 kb, near_gene/Upstream gene/MODIFIER); TRBV27 (4.1 kb, near_gene/Upstream gene/MODIFIER); TRBV28 (9.4 kb); PGBD4P1 (11 kb); TRBV26 (15 kb); TRBV29-1 (29 kb); TRBVA (29 kb); PRSS1 (38 kb); TRBV25-1 (40 kb); PRSS3P1 (49 kb)	-0.122198	-0.179627	4.451	0.361744	0.237 Pancreatitis	C7orf34 | ENST00000390388 | ENST00000390397 | ENST00000390401 | ENST00000390418 | ENST00000390419 | EPHB6 | OR9A2 | PGBD4P1 | PRSS1 | PRSS3P1 | PRSS3P2 | RP5-894A10.2 | TRBV19 | TRBV21-1 | TRBV24-1 | TRBV25-1 | TRBV27 | TRBV28 | TRBV29-1 | TRBV7-8 | U66060.1-19 | U66060.1-21 | U66060.1-23 | U66061.1-11 | unnamed		ACP vs. all controls	1.32135	1.22-1.4	10.1735	1.24224	1.12-1.4	3.86431	1.40351	1.27-1.6	8.78432
rs36114780	7	142420011	A	G	0.4185	0	0.991	rs17251	0.997287	FALSE	TRBVB (0.26 kb, near_gene/Downstream gene/MODIFIER); TRBV27 (3.2 kb, near_gene/Upstream gene/MODIFIER); TRBV28 (8.5 kb); PGBD4P1 (10 kb); TRBV26 (16 kb); TRBV29-1 (28 kb); TRBVA (30 kb); PRSS1 (37 kb); TRBV25-1 (41 kb); PRSS3P1 (48 kb)	-0.62477	-0.224414	0.322	0.659215	0.237 Pancreatitis	C7orf34 | ENST00000390388 | ENST00000390397 | ENST00000390401 | ENST00000390418 | ENST00000390419 | EPHB6 | OR9A2 | PGBD4P1 | PRSS1 | PRSS3P1 | PRSS3P2 | RP5-894A10.2 | TRBV19 | TRBV21-1 | TRBV24-1 | TRBV25-1 | TRBV27 | TRBV28 | TRBV29-1 | TRBV7-8 | U66060.1-19 | U66060.1-21 | U66060.1-23 | U66061.1-11 | unnamed		ACP vs. all controls	1.32135	1.22-1.4	10.1735	1.24254	1.12-1.4	3.8845	1.40371	1.27-1.6	8.79103
rs5916761	23	105821270	G	A	0.2198	0	0.674	rs10465287	0.954912	FALSE						0.963 Pancreatitis		CDIPT | PDGFD	ACP vs. all controls	1.87964	1.57-2.25	10.0643	2.44391	1.86-3.22	8.76796	1.82358	1.46-2.28	6.48612
rs67184230	23	105629568	C	G	0.2186	0	0.699	rs10465287	0.903565	FALSE						0.972 Pancreatitis		CDIPT | PDGFD	ACP vs. all controls	1.85058	1.54-2.2	9.88573	2.41042	1.85-3.1	8.7714	1.77022	1.43-2.2	6.07297
rs7794495	7	142414803	G	C	0.4184	0	0.975	rs17251	0.987737	FALSE	TRBVB (4.4 kb, near_gene/Upstream gene/MODIFIER); TRBV27 (8.4 kb); TRBV26 (11 kb); TRBV28 (14 kb); PGBD4P1 (15 kb); TRBVA (25 kb); TRBV29-1 (33 kb); TRBV25-1 (36 kb); PRSS1 (43 kb)	-0.76195	-0.136119	0.178	0.399143	0.237 Pancreatitis	C7orf34 | ENST00000390388 | ENST00000390397 | ENST00000390401 | ENST00000390418 | ENST00000390419 | EPHB6 | OR9A2 | PGBD4P1 | PRSS1 | PRSS3P1 | PRSS3P2 | RP5-894A10.2 | TRBV19 | TRBV21-1 | TRBV24-1 | TRBV25-1 | TRBV27 | TRBV28 | TRBV29-1 | TRBV7-8 | U66060.1-19 | U66060.1-21 | U66060.1-23 | U66061.1-11 | unnamed		ACP vs. all controls	1.31735	1.22-1.4	9.83219	1.23442	1.11-1.4	3.63658	1.39587	1.25-1.6	8.43906
chr1:15758679:D	1	15758679	AAAAC	A	0.2049	0	0.92	chr1:15758679:D	1	TRUE	EFHD2 (1.8 kb); CTRC (6.3 kb); CELA2A (25 kb); FHAD1 (32 kb); CELA2B (34 kb)			1.067		NA	CASP9 | CTRC | DNAJC16 | EFHD2 | PLEKHM2		ACP vs. all controls	1.4472	1.3-1.61	9.81473	1.4485	1.26-1.67	6.10523	1.4471	1.26-1.66	6.30992
rs35994710	1	15758963	C	T	0.192	0	0.943	chr1:15758679:D	0.956909	FALSE	EFHD2 (2.1 kb, near_gene/Downstream gene/MODIFIER); CTRC (6 kb); CELA2A (24 kb); FHAD1 (32 kb); CELA2B (33 kb)	0.344734	1.23889	4.086	0.495002	NA	CASP9 | CTRC | DNAJC16 | EFHD2 | PLEKHM2		ACP vs. all controls	1.4518	1.3-1.62	9.70565	1.468	1.27-1.69	6.36248	1.4479	1.26-1.67	6.21545
rs10927785	1	15757224	C	T	0.1934	0	0.936	chr1:15758679:D	0.958592	FALSE	EFHD2 (0.38 kb, near_gene/Downstream gene/MODIFIER); CTRC (7.7 kb); CELA2A (26 kb); FHAD1 (30 kb); CELA2B (35 kb)	-0.480439	-0.238227	1.199	0.458516	NA	CASP9 | CTRC | DNAJC16 | EFHD2 | PLEKHM2		ACP vs. all controls	1.4515	1.3-1.62	9.69568	1.4651	1.27-1.69	6.28763	1.4554	1.27-1.67	6.37298
rs55916943	23	105556354	A	G	0.146	0	0.663	rs55916943	1	TRUE						0.688 Pancreatitis		CDIPT | PDGFD	ACP vs. all controls	2.06079	1.67-2.6	9.64876	2.90713	2.08-4	8.57025	1.87088	1.45-2.4	5.2342
rs73740310	7	142481376	A	T	0.3316	0	0.577	rs73740310	1	TRUE	PRSS3P2 (0 kb, nc-exon/Non coding transcript exon/MODIFIER | nc-RNA/Non coding transcript/MODIFIER | near_gene/Downstream gene/MODIFIER); WBP1LP1 (5.1 kb); PRSS3P1 (9.6 kb); TRBJ2-1 (13 kb); TRBJ2-2 (13 kb); TRBJ2-2P (13 kb); TRBJ2-3 (13 kb); TRBJ2-4 (13 kb); TRBJ2-5 (13 kb); TRBJ2-6 (14 kb); TRBJ2-7 (14 kb); TRBC2 (17 kb); PRSS1 (20 kb); TRBV30 (29 kb); TRBV29-1 (33 kb)	0.139333	-0.144564	10.02	0.563811	0.281 Pancreatitis	C7orf34 | ENST00000390397 | ENST00000390401 | ENST00000390418 | ENST00000390419 | EPHB6 | PRSS1 | PRSS3P1 | PRSS3P2 | TRBV19 | TRBV24-1 | TRBV28 | TRBV29-1 | U66060.1-19 | U66060.1-23 | U66061.1-11 | unnamed		ACP vs. alcoholic controls	1.46499	1.32-1.6	9.56158	1.41804	1.22-1.6	4.9812	1.67588	1.45-2	10.1802
rs12853674	23	106134938	T	C	0.0806	2	1	rs34689332	0.912109	FALSE	MORC4 (0 kb, intron/Intron/MODIFIER)					NA		FGFBP2	ACP vs. all controls	2.08165	1.67-2.6	9.47087	1.83457	1.32-2.6	3.2613	2.15438	1.64-2.9	6.82523
rs12532977	7	142495126	A	G	0.433	0	0.868	rs57586289	0.84043	FALSE	TRBJ2-7 (0.014 kb, near_gene/Upstream gene/MODIFIER); TRBJ2-6 (0.15 kb, near_gene/Downstream gene/MODIFIER); TRBJ2-5 (0.28 kb, near_gene/Downstream gene/MODIFIER); TRBJ2-4 (0.4 kb, near_gene/Downstream gene/MODIFIER); TRBJ2-3 (0.55 kb, near_gene/Downstream gene/MODIFIER); TRBJ2-2P (0.7 kb, near_gene/Downstream gene/MODIFIER); TRBJ2-2 (0.83 kb, near_gene/Downstream gene/MODIFIER); TRBJ2-1 (1 kb, n…	0.514418	1.74717	9.29	0.694515	0.333 Pancreatitis	C7orf34 | ENST00000390397 | ENST00000390401 | ENST00000390418 | ENST00000390419 | EPHB6 | PRSS1 | PRSS3P1 | PRSS3P2 | TRBV19 | TRBV21-1 | TRBV24-1 | TRBV28 | TRBV29-1 | U66060.1-19 | U66060.1-23 | U66061.1-11 | unnamed		ACP vs. all controls	1.32837	1.22-1.4	9.30102	1.3369	1.19-1.5	5.66238	1.44613	1.28-1.6	8.77736
rs56111168	7	142495127	T	G	0.433	0	0.868	rs57586289	0.840438	FALSE	TRBJ2-7 (0.013 kb, near_gene/Upstream gene/MODIFIER); TRBJ2-6 (0.15 kb, near_gene/Downstream gene/MODIFIER); TRBJ2-5 (0.28 kb, near_gene/Downstream gene/MODIFIER); TRBJ2-4 (0.4 kb, near_gene/Downstream gene/MODIFIER); TRBJ2-3 (0.55 kb, near_gene/Downstream gene/MODIFIER); TRBJ2-2P (0.7 kb, near_gene/Downstream gene/MODIFIER); TRBJ2-2 (0.83 kb, near_gene/Downstream gene/MODIFIER); TRBJ2-1 (1 kb, n…	0.383269	1.73755	4.011	0.603491	0.327 Pancreatitis	C7orf34 | ENST00000390397 | ENST00000390401 | ENST00000390418 | ENST00000390419 | EPHB6 | PRSS1 | PRSS3P1 | PRSS3P2 | TRBV19 | TRBV21-1 | TRBV24-1 | TRBV28 | TRBV29-1 | U66060.1-19 | U66060.1-23 | U66061.1-11 | unnamed		ACP vs. all controls	1.32837	1.22-1.4	9.30102	1.3369	1.19-1.5	5.66238	1.44613	1.28-1.6	8.77736
rs10808021	7	142480148	C	G	0.3329	0	0.613	rs10808021	1	TRUE	PRSS3P2 (0 kb, nc-exon/Non coding transcript exon/MODIFIER | intron/Intron/MODIFIER | nc-RNA/Non coding transcript/MODIFIER | near_gene/Upstream gene/MODIFIER); WBP1LP1 (6.3 kb); PRSS3P1 (8.4 kb); TRBJ2-1 (14 kb); TRBJ2-2 (14 kb); TRBJ2-2P (14 kb); TRBJ2-3 (14 kb); TRBJ2-4 (15 kb); TRBJ2-5 (15 kb); TRBJ2-6 (15 kb); TRBJ2-7 (15 kb); TRBC2 (19 kb); PRSS1 (19 kb); TRBV30 (30 kb); TRBV29-1 (31 kb); P…	-0.0607722	0.167488	5.668	0.283995	0.406 Pancreatitis	C7orf34 | ENST00000390397 | ENST00000390401 | ENST00000390418 | ENST00000390419 | EPHB6 | PRSS1 | PRSS3P1 | PRSS3P2 | TRBV19 | TRBV24-1 | TRBV28 | TRBV29-1 | U66060.1-19 | U66060.1-23 | U66061.1-11 | unnamed		ACP vs. all controls	1.44279	1.3-1.6	9.28287	1.46306	1.27-1.7	5.98939	1.56006	1.35-1.8	8.38355
chr7:142495127:I	7	142495127	GAT	G	0.4336	0	0.866	rs57586289	0.846615	FALSE	TRBJ2-7 (0.013 kb, near_gene/Upstream gene/MODIFIER); TRBJ2-6 (0.15 kb, near_gene/Downstream gene/MODIFIER); TRBJ2-5 (0.28 kb, near_gene/Downstream gene/MODIFIER); TRBJ2-4 (0.4 kb, near_gene/Downstream gene/MODIFIER); TRBJ2-3 (0.55 kb, near_gene/Downstream gene/MODIFIER); TRBJ2-2P (0.7 kb, near_gene/Downstream gene/MODIFIER); TRBJ2-2 (0.83 kb, near_gene/Downstream gene/MODIFIER); TRBJ2-1 (1 kb, n…			7.202		0.327 Pancreatitis	C7orf34 | ENST00000390397 | ENST00000390401 | ENST00000390418 | ENST00000390419 | EPHB6 | PRSS1 | PRSS3P1 | PRSS3P2 | TRBV19 | TRBV21-1 | TRBV24-1 | TRBV28 | TRBV29-1 | U66060.1-19 | U66060.1-23 | U66061.1-11 | unnamed		ACP vs. all controls	1.32749	1.22-1.4	9.26082	1.34372	1.2-1.5	5.82376	1.46263	1.3-1.6	9.22445
rs12857658	23	106524515	A	G	0.0733	0	0.631	rs12857658	1	TRUE						NA		FGFBP2	ACP vs. all controls	2.58559	1.96-3.4	9.22839	2.47221	1.61-3.8	4.02819	2.51713	1.75-3.6	5.96472
rs2226970	7	142355935	C	A	0.4172	0	0.895	rs2226970	1	TRUE	TRBV23-1 (2 kb, near_gene/Downstream gene/MODIFIER); TRBV22-1 (6.2 kb); TRBV24-1 (8.3 kb); TRBV21-1 (11 kb); TRBV20-1 (21 kb); TRBV25-1 (23 kb); TRBV19 (29 kb); TRBVA (33 kb); TRBV26 (48 kb)	-0.132253	-0.193708	1.586	0.827903	NA	ENST00000390388 | ENST00000390397 | ENST00000390401 | ENST00000390418 | ENST00000390419 | EPHB6 | OR9A2 | PGBD4P1 | PRSS1 | PRSS3P1 | RP5-894A10.2 | TRBV19 | TRBV21-1 | TRBV24-1 | TRBV25-1 | TRBV27 | TRBV28 | TRBV29-1 | TRBV7-8 | U66060.1-19 | U66060.1-21 | U66060.1-23 | U66061.1-11 | unnamed		ACP vs. all controls	1.32013	1.22-1.4	9.20196	1.23335	1.1-1.4	3.34169	1.37382	1.23-1.5	7.15262
rs4427082	7	142412567	A	G	0.3907	0	0.928	rs17251	0.866471	FALSE	TRBVB (6.6 kb); TRBV26 (8.6 kb); TRBV27 (11 kb); TRBV28 (16 kb); PGBD4P1 (18 kb); TRBVA (23 kb); TRBV25-1 (33 kb); TRBV29-1 (35 kb); PRSS1 (45 kb); TRBV24-1 (48 kb)	-0.57276	-0.228167	1.982	0.640619	NA	ENST00000390388 | ENST00000390397 | ENST00000390401 | ENST00000390418 | ENST00000390419 | EPHB6 | OR9A2 | PGBD4P1 | PRSS1 | PRSS3P1 | RP5-894A10.2 | TRBV19 | TRBV21-1 | TRBV24-1 | TRBV25-1 | TRBV27 | TRBV28 | TRBV29-1 | TRBV7-8 | U66060.1-19 | U66060.1-21 | U66060.1-23 | U66061.1-11 | unnamed		ACP vs. all controls	1.31579	1.2-1.4	9.12009	1.21256	1.09-1.4	2.92941	1.39392	1.25-1.6	7.81183
rs6693417	1	15763340	A	G	0.3605	2	1	rs6693417	1	TRUE	CTRC (1.6 kb, near_gene/Upstream gene/MODIFIER); EFHD2 (6.5 kb); CELA2A (20 kb); CELA2B (29 kb); FHAD1 (36 kb)	-0.206352	-0.192295	5.891	0.769452	NA	CASP9 | CTRC | DNAJC16 | EFHD2 | PLEKHM2 | SLC25A34 | SPEN | TMEM51		ACP vs. all controls	1.3197	1.21-1.43	9.10238	1.3853	1.24-1.55	7.31593	1.2951	1.16-1.45	4.92778
rs13239736	7	142327843	G	T	0.3922	0	0.844	rs13239736	1	TRUE	TRBV19 (0.8 kb, near_gene/Downstream gene/MODIFIER); TRBV20-1 (6.3 kb); TRBV21-1 (17 kb); TRBV22-1 (21 kb); TRBV23-1 (26 kb); TRBV24-1 (36 kb)	-0.764088	-0.287507	0.054	0.277972	NA	ENST00000390349 | ENST00000390351 | ENST00000390388 | ENST00000390397 | EPHB6 | OR9A2 | PGBD4P1 | PRSS1 | RP5-894A10.2 | TRBV10-1 | TRBV10-2 | TRBV19 | TRBV2 | TRBV21-1 | TRBV24-1 | TRBV25-1 | TRBV27 | TRBV28 | TRBV29-1 | TRBV4-2 | TRBV7-8 | U66060.1-19 | U66060.1-21 | U66060.1-23 | U66061.1-11 | unnamed	PALLD	ACP vs. all controls	1.33156	1.22-1.4	9.09232	1.24938	1.11-1.4	3.45809	1.33887	1.19-1.5	5.73012
rs6700655	1	15759547	T	A	0.3384	0	0.957	rs6693417	0.926145	FALSE	EFHD2 (2.7 kb, near_gene/Downstream gene/MODIFIER); CTRC (5.4 kb); CELA2A (24 kb); FHAD1 (33 kb); CELA2B (33 kb)	0.108537	1.65615	4.545	0.807028	NA	CASP9 | CTRC | DNAJC16 | EFHD2 | PLEKHM2 | SLC25A34 | SPEN | TMEM51		ACP vs. all controls	1.3343	1.22-1.46	9.0606	1.4017	1.25-1.57	7.23562	1.3235	1.18-1.49	5.31498
rs12724615	1	15761353	C	T	0.348	0	0.966	rs6693417	0.964827	FALSE	CTRC (3.6 kb, near_gene/Upstream gene/MODIFIER); EFHD2 (4.5 kb, near_gene/Downstream gene/MODIFIER); CELA2A (22 kb); CELA2B (31 kb); FHAD1 (34 kb)	-0.835153	0.101101	2.603	0.400472	NA	CASP9 | CTRC | DNAJC16 | EFHD2 | PLEKHM2 | SLC25A34 | SPEN | TMEM51		ACP vs. all controls	1.327	1.22-1.45	9.0053	1.3902	1.24-1.56	7.13607	1.3128	1.17-1.47	5.16808
rs4661626	1	15764150	G	A	0.3377	0	0.963	rs6693417	0.934293	FALSE	CTRC (0.78 kb, near_gene/Upstream gene/MODIFIER); EFHD2 (7.3 kb); CELA2A (19 kb); CELA2B (28 kb); FHAD1 (37 kb)	-0.358808	-0.211924	3.406	0.792178	NA	CASP9 | CTRC | DNAJC16 | EFHD2 | PLEKHM2 | SLC25A34 | SPEN | TMEM51		ACP vs. all controls	1.328	1.22-1.45	8.89864	1.415	1.26-1.59	7.70457	1.2959	1.16-1.45	4.66888
rs6954663	7	142391065	T	G	0.377	0	0.963	rs6954663	1	TRUE	TRBVA (1.4 kb, near_gene/Downstream gene/MODIFIER); TRBV25-1 (12 kb); TRBV26 (12 kb); TRBV24-1 (26 kb); TRBVB (28 kb); TRBV27 (32 kb); TRBV23-1 (37 kb); TRBV28 (37 kb); PGBD4P1 (39 kb); TRBV22-1 (41 kb); TRBV21-1 (46 kb)	-0.618821	-0.264007	0.066	0.432325	0.23 Pancreatitis	C7orf34 | ENST00000390349 | ENST00000390388 | ENST00000390397 | ENST00000390401 | ENST00000390418 | ENST00000390419 | EPHB6 | OR9A2 | PGBD4P1 | PRSS1 | PRSS3P1 | PRSS3P2 | RP5-894A10.2 | TRBV19 | TRBV21-1 | TRBV24-1 | TRBV25-1 | TRBV27 | TRBV28 | TRBV29-1 | TRBV7-3 | TRBV7-8 | TRBV8-2 | U66060.1-19 | U66060.1-21 | U66060.1-23 | U66061.1-11 | unnamed		ACP vs. all controls	1.30582	1.2-1.4	8.85214	1.24347	1.11-1.4	3.66828	1.38466	1.23-1.5	7.72616
rs2213213	7	142411878	C	T	0.3961	0	0.953	rs17251	0.878965	FALSE	TRBVB (7.3 kb); TRBV26 (7.9 kb); TRBV27 (11 kb); TRBV28 (17 kb); PGBD4P1 (18 kb); TRBVA (22 kb); TRBV25-1 (33 kb); TRBV29-1 (36 kb); PRSS1 (45 kb); TRBV24-1 (47 kb)	-0.103473	-0.108927	9.76	0.761829	NA	ENST00000390388 | ENST00000390397 | ENST00000390401 | ENST00000390418 | ENST00000390419 | EPHB6 | OR9A2 | PGBD4P1 | PRSS1 | PRSS3P1 | RP5-894A10.2 | TRBV19 | TRBV21-1 | TRBV24-1 | TRBV25-1 | TRBV27 | TRBV28 | TRBV29-1 | TRBV7-8 | U66060.1-19 | U66060.1-21 | U66060.1-23 | U66061.1-11 | unnamed		ACP vs. all controls	1.30344	1.2-1.4	8.77957	1.20715	1.09-1.4	2.87559	1.3988	1.25-1.6	8.14723
rs7541863	1	15760092	C	T	0.3478	0	0.962	rs6693417	0.963661	FALSE	EFHD2 (3.3 kb, near_gene/Downstream gene/MODIFIER); CTRC (4.8 kb, near_gene/Upstream gene/MODIFIER); CELA2A (23 kb); CELA2B (32 kb); FHAD1 (33 kb)	-0.201599	1.04012	9.222	0.877033	NA	CASP9 | CTRC | DNAJC16 | EFHD2 | PLEKHM2 | SLC25A34 | SPEN | TMEM51		ACP vs. all controls	1.3227	1.21-1.44	8.77843	1.3856	1.24-1.55	6.98404	1.2971	1.16-1.45	4.75543
rs4725596	7	142411607	T	G	0.3956	0	0.953	rs17251	0.87613	FALSE	TRBVB (7.6 kb); TRBV26 (7.6 kb); TRBV27 (12 kb); TRBV28 (17 kb); PGBD4P1 (19 kb); TRBVA (22 kb); TRBV25-1 (33 kb); TRBV29-1 (36 kb); PRSS1 (46 kb); TRBV24-1 (47 kb)	-0.590859	-0.240524	0.3	0.554159	NA	ENST00000390388 | ENST00000390397 | ENST00000390401 | ENST00000390418 | ENST00000390419 | EPHB6 | OR9A2 | PGBD4P1 | PRSS1 | PRSS3P1 | RP5-894A10.2 | TRBV19 | TRBV21-1 | TRBV24-1 | TRBV25-1 | TRBV27 | TRBV28 | TRBV29-1 | TRBV7-8 | U66060.1-19 | U66060.1-21 | U66060.1-23 | U66061.1-11 | unnamed		ACP vs. all controls	1.30242	1.2-1.4	8.73187	1.20627	1.09-1.4	2.85698	1.39704	1.25-1.6	8.09124
rs10754889	1	15757666	G	A	0.3349	0	0.939	rs6693417	0.904674	FALSE	EFHD2 (0.83 kb, near_gene/Downstream gene/MODIFIER); CTRC (7.3 kb); CELA2A (26 kb); FHAD1 (31 kb); CELA2B (35 kb)	-0.121159	0.296959	3.873	0.745949	NA	CASP9 | CTRC | DNAJC16 | EFHD2 | PLEKHM2 | SLC25A34 | SPEN | TMEM51		ACP vs. all controls	1.3317	1.22-1.45	8.72885	1.3938	1.24-1.57	6.84696	1.3216	1.18-1.49	5.14177
rs149055315	23	105974192	A	T	0.0774	0	0.584	rs149055315	1	TRUE	RNF128 (0 kb, intron/Intron/MODIFIER)					0.294 Pancreatitis		CDIPT | PDGFD	ACP vs. all controls	2.57564	1.92-3.4	8.68831	3.87044	2.38-6.2	6.79344	2.5981	1.79-3.8	5.80053
rs10803384	1	15770101	C	A	0.2058	0	0.92	chr1:15758679:D	0.876854	FALSE	CTRC (0 kb, intron/Intron/MODIFIER | nc-RNA/Non coding transcript/MODIFIER | near_gene/Downstream gene/MODIFIER); CELA2A (13 kb); EFHD2 (13 kb); CELA2B (22 kb); FHAD1 (43 kb); CASP9 (47 kb)	0.012711	-0.168243	3.928	0.458747	NA	AGMAT | ANO7P1 | ARHGEF19 | ARHGEF19-AS1 | C1orf144 | CASP9 | CELA2A | CROCCP3 | CTRC | DNAJC16 | EFHD2 | PLEKHM2 | RSC1A1 | SLC25A34 | SPATA21 | SPEN		ACP vs. all controls	1.409	1.27-1.57	8.65871	1.445	1.26-1.66	6.03364	1.3779	1.2-1.58	4.92934
rs10803383	1	15765825	G	A	0.3501	0	0.963	rs6693417	0.963501	FALSE	CTRC (0 kb, intron/Intron/MODIFIER | nc-RNA/Non coding transcript/MODIFIER | near_gene/Upstream gene/MODIFIER); EFHD2 (9 kb); CELA2A (17 kb); CELA2B (27 kb); FHAD1 (39 kb)	-0.271976	-0.213949	2.513	0.733896	NA	CASP9 | CTRC | DNAJC16 | EFHD2 | PLEKHM2 | SLC25A34 | SPEN | TMEM51		ACP vs. all controls	1.3187	1.21-1.44	8.6403	1.3874	1.24-1.55	7.07897	1.288	1.15-1.44	4.54451
rs10436957	1	15768304	G	A	0.1984	0	0.928	chr1:15758679:D	0.918349	FALSE	CTRC (0 kb, intron/Intron/MODIFIER | nc-RNA/Non coding transcript/MODIFIER); EFHD2 (11 kb); CELA2A (15 kb); CELA2B (24 kb); FHAD1 (41 kb); CASP9 (49 kb)	-0.341775	-0.216326	2.408	0.553079	NA	CASP9 | CTRC | DNAJC16 | EFHD2 | PLEKHM2 | SLC25A34 | SPEN		ACP vs. all controls	1.4117	1.27-1.57	8.57202	1.4408	1.25-1.66	5.82968	1.4122	1.23-1.62	5.55226
rs10436954	1	15768485	G	C	0.1984	0	0.928	chr1:15758679:D	0.918013	FALSE	CTRC (0 kb, intron/Intron/MODIFIER | nc-RNA/Non coding transcript/MODIFIER); EFHD2 (12 kb); CELA2A (15 kb); CELA2B (24 kb); FHAD1 (42 kb); CASP9 (49 kb)	-0.762409	-0.280477	0.021	0.401937	NA	CASP9 | CTRC | DNAJC16 | EFHD2 | PLEKHM2		ACP vs. all controls	1.411	1.27-1.57	8.54932	1.4402	1.25-1.66	5.81775	1.4115	1.23-1.62	5.538
chr1:15762838:D	1	15762838	CTAAG	C	0.3523	0	0.979	rs6693417	0.981727	FALSE	CTRC (2.1 kb); EFHD2 (6 kb); CELA2A (20 kb); CELA2B (30 kb); FHAD1 (36 kb)			4.897		NA	CASP9 | CTRC | DNAJC16 | EFHD2 | PLEKHM2 | SLC25A34 | SPEN | TMEM51		ACP vs. all controls	1.3122	1.21-1.43	8.53722	1.3749	1.23-1.54	6.81264	1.289	1.15-1.44	4.6533
rs17253550	23	105882040	C	T	0.0764	0	0.561	rs149055315	0.935622	FALSE	CXorf57 (0 kb, intron/Intron/MODIFIER | near_gene/Downstream gene/MODIFIER | near_gene/Upstream gene/MODIFIER); MIR548AN (1 kb, near_gene/Upstream gene/MODIFIER)					0.33 Pancreatitis		CDIPT | PDGFD	ACP vs. all controls	2.62852	1.96-3.6	8.52261	4.12778	2.5-6.7	6.95236	2.60734	1.75-3.8	5.48527
chr7:142460261	7	142460261	T	A	0.4864	0	0.557	chr7:142460744	0.836874	FALSE	PRSS1 (0 kb, intron/Intron/MODIFIER | nc-RNA/Non coding transcript/MODIFIER | near_gene/Downstream gene/MODIFIER); PRSS3P1 (8 kb); TRBV29-1 (12 kb); PRSS3P2 (18 kb); WBP1LP1 (26 kb); PGBD4P1 (30 kb); TRBV28 (31 kb); TRBJ2-1 (34 kb); TRBJ2-2 (34 kb); TRBJ2-2P (34 kb); TRBJ2-3 (34 kb); TRBJ2-4 (34 kb); TRBJ2-5 (35 kb); TRBJ2-6 (35 kb); TRBJ2-7 (35 kb); TRBV27 (37 kb); TRBC2 (38 kb); TRBVB (41 kb)	-0.365725	-0.225515	5.986	0.816276	NA			ACP vs. alcoholic controls	1.403	1.26-1.56	8.49014	1.3514	1.17-1.56	4.04392	1.5992	1.39-1.84	9.26547
rs17253508	23	105847036	A	G	0.0749	0	0.567	rs149055315	0.940312	FALSE						0.325 Pancreatitis		CDIPT | PDGFD	ACP vs. all controls	2.62937	1.96-3.6	8.46697	4.07134	2.5-6.7	6.82041	2.61494	1.79-3.8	5.47549
rs8048784	16	75254862	T	G	0.2753	0	0.908	rs8055167	0.999399	FALSE	CTRB1 (0 kb, intron/Intron/MODIFIER | near_gene/Upstream gene/MODIFIER); BCAR1 (8.1 kb); CTRB2 (14 kb); ZFP1 (49 kb)	-0.640114	-0.259092	0.123	0.562154	NA	BCAR1 | CFDP1 | CTRB1 | CTRB2 | RFWD3 | RP11-252K23.2 | TMEM170A	APLP2 | FABP5	ACP vs. all controls	1.35245	1.23-1.5	8.37705	1.40944	1.23-1.6	6.30321	1.35026	1.19-1.5	5.12766
rs8055167	16	75254889	C	T	0.2751	0	0.908	rs8055167	1	TRUE	CTRB1 (0 kb, intron/Intron/MODIFIER | near_gene/Upstream gene/MODIFIER); BCAR1 (8 kb); CTRB2 (14 kb); ZFP1 (49 kb)	-1.00708	-0.304841	0.144	0.163895	NA	BCAR1 | CFDP1 | CTRB1 | CTRB2 | RFWD3 | RP11-252K23.2 | TMEM170A	APLP2 | FABP5	ACP vs. all controls	1.35245	1.23-1.5	8.37705	1.40825	1.23-1.6	6.27521	1.35007	1.19-1.5	5.13772
rs8051037	16	75255062	G	A	0.275	0	0.908	rs8055167	0.999843	FALSE	CTRB1 (0 kb, intron/Intron/MODIFIER | near_gene/Upstream gene/MODIFIER); RP11-331F4.4 (4.9 kb, near_gene/Upstream gene/MODIFIER); BCAR1 (7.9 kb); CTRB2 (14 kb); ZFP1 (49 kb)	-0.242416	-0.196798	2.262	0.327424	NA	BCAR1 | CFDP1 | CTRB1 | CTRB2 | RFWD3 | RP11-252K23.2 | TMEM170A	APLP2 | FABP5	ACP vs. all controls	1.35227	1.23-1.5	8.37015	1.40805	1.23-1.6	6.27055	1.35026	1.19-1.5	5.12766
rs4888360	16	75254584	C	T	0.2751	0	0.909	rs8055167	0.999815	FALSE	CTRB1 (0 kb, intron/Intron/MODIFIER | near_gene/Upstream gene/MODIFIER); BCAR1 (8.3 kb); CTRB2 (14 kb); ZFP1 (48 kb)	-0.686296	-0.262189	1.12	0.404744	NA	BCAR1 | CFDP1 | CTRB1 | CTRB2 | RFWD3 | RP11-252K23.2 | TMEM170A	APLP2 | FABP5	ACP vs. all controls	1.35208	1.23-1.5	8.36326	1.40845	1.23-1.6	6.27987	1.34953	1.19-1.5	5.1254
chr7:142460335	7	142460335	A	G	0.4804	0	0.556	chr7:142460744	0.822671	FALSE	PRSS1 (0 kb, exon/Missense/MODERATE | nc-exon/Non coding transcript exon/MODIFIER | nc-RNA/Non coding transcript/MODIFIER | near_gene/Downstream gene/MODIFIER); PRSS3P1 (7.9 kb); TRBV29-1 (12 kb); PRSS3P2 (18 kb); WBP1LP1 (26 kb); PGBD4P1 (30 kb); TRBV28 (31 kb); TRBJ2-1 (34 kb); TRBJ2-2 (34 kb); TRBJ2-2P (34 kb); TRBJ2-3 (34 kb); TRBJ2-4 (34 kb); TRBJ2-5 (34 kb); TRBJ2-6 (35 kb); TRBJ2-7 (35 kb)…	-2.14013	-2.21358	0.001	0.119017	NA			ACP vs. alcoholic controls	1.3995	1.26-1.56	8.34681	1.3549	1.17-1.56	4.10469	1.5886	1.38-1.83	9.00144
rs4645995	1	15849003	C	G	0.0712	0	0.934	rs4645995	1	TRUE	CASP9 (0 kb, intron/NMD transcript/MODIFIER | intron/Intron/MODIFIER | nc-RNA/Non coding transcript/MODIFIER); DNAJC16 (4.3 kb, near_gene/Upstream gene/MODIFIER); CELA2B (31 kb); AGMAT (50 kb)	-0.254384	-0.169598	0.431	0.644784	NA	AGMAT | CASP9 | CROCCP3 | DNAJC16 | PLEKHM2 | RP11-288I21.1 | RSC1A1 | SLC25A34	CD97	ACP vs. all controls	1.58003	1.37-1.8	8.24945	1.60746	1.32-2	4.73689	1.57729	1.3-1.9	4.75806
rs6954927	7	142381519	G	T	0.3891	0	0.956	rs17251	0.805181	FALSE	TRBV25-1 (2.4 kb, near_gene/Downstream gene/MODIFIER); TRBVA (7.7 kb); TRBV24-1 (17 kb); TRBV26 (22 kb); TRBV23-1 (28 kb); TRBV22-1 (32 kb); TRBV21-1 (37 kb); TRBVB (38 kb); TRBV27 (42 kb); TRBV20-1 (47 kb); TRBV28 (47 kb); PGBD4P1 (49 kb)	-0.291139	-0.210529	5.205	0.704834	NA	ENST00000390388 | ENST00000390397 | ENST00000390401 | ENST00000390418 | ENST00000390419 | EPHB6 | OR9A2 | PGBD4P1 | PRSS1 | PRSS3P1 | RP5-894A10.2 | TRBV19 | TRBV21-1 | TRBV24-1 | TRBV25-1 | TRBV27 | TRBV28 | TRBV29-1 | TRBV7-8 | U66060.1-19 | U66060.1-21 | U66060.1-23 | U66061.1-11 | unnamed		ACP vs. all controls	1.29349	1.19-1.4	8.24471	1.18963	1.06-1.3	2.48941	1.37344	1.23-1.5	7.37681
rs9652674	16	75255473	A	G	0.2801	0	0.903	rs8055167	0.978379	FALSE	CTRB1 (0 kb, intron/Intron/MODIFIER | near_gene/Upstream gene/MODIFIER); RP11-331F4.4 (4.5 kb, near_gene/Upstream gene/MODIFIER); BCAR1 (7.5 kb); CTRB2 (14 kb); ZFP1 (49 kb)	-0.362661	-0.22143	1.338	0.420419	NA	BCAR1 | CFDP1 | CTRB1 | CTRB2 | RFWD3 | RP11-252K23.2 | TMEM170A	APLP2 | FABP5	ACP vs. all controls	1.34698	1.22-1.5	8.20276	1.41223	1.25-1.6	6.42261	1.34953	1.19-1.5	5.1254
rs140595859	23	105996449	T	A	0.0792	0	0.613	rs149055315	0.855059	FALSE	RNF128 (0 kb, intron/Intron/MODIFIER)					0.269 Pancreatitis		CDIPT | PDGFD	ACP vs. all controls	2.40743	1.82-3.2	8.19813	3.90416	2.44-6.2	7.19008	2.27358	1.59-3.2	4.97731
rs9652665	16	75255516	C	T	0.2795	0	0.9	rs8055167	0.984687	FALSE	CTRB1 (0 kb, intron/Intron/MODIFIER | near_gene/Upstream gene/MODIFIER); RP11-331F4.4 (4.5 kb, near_gene/Upstream gene/MODIFIER); BCAR1 (7.4 kb); CTRB2 (14 kb); ZFP1 (49 kb)	-0.632808	-0.259826	1.331	0.551977	NA	BCAR1 | CFDP1 | CTRB1 | CTRB2 | RFWD3 | RP11-252K23.2 | TMEM170A	APLP2 | FABP5	ACP vs. all controls	1.34445	1.22-1.5	8.10774	1.42491	1.25-1.6	6.70801	1.3421	1.18-1.5	4.97276
rs2213212	7	142406737	A	C	0.3967	0	0.978	rs17251	0.848257	FALSE	TRBV26 (2.7 kb, near_gene/Downstream gene/MODIFIER); TRBVB (12 kb); TRBV27 (16 kb); TRBVA (17 kb); TRBV28 (22 kb); PGBD4P1 (23 kb); TRBV25-1 (28 kb); TRBV29-1 (41 kb); TRBV24-1 (42 kb)	-0.499014	-0.209211	0.413	0.441156	NA	ENST00000390388 | ENST00000390397 | ENST00000390401 | ENST00000390418 | ENST00000390419 | EPHB6 | OR9A2 | PGBD4P1 | PRSS1 | PRSS3P1 | RP5-894A10.2 | TRBV10-1 | TRBV10-2 | TRBV19 | TRBV2 | TRBV21-1 | TRBV24-1 | TRBV25-1 | TRBV27 | TRBV28 | TRBV29-1 | TRBV4-2 | TRBV5-3 | TRBV7-3 | TRBV7-8 | TRBV8-2 | TRBV9 | U66060.1-19 | U66060.1-21 | U66060.1-23 | U66061.1-11 | unnamed		ACP vs. all controls	1.2843	1.19-1.39	8.07716	1.19	1.07-1.33	2.57296	1.358	1.22-1.51	7.08938
chr1:15759699:D	1	15759699	GACGGATCAC	G	0.288	0	0.894	chr1:15759699:D	1	TRUE	EFHD2 (2.9 kb, near_gene/Downstream gene/MODIFIER); CTRC (5.2 kb); CELA2A (24 kb); CELA2B (33 kb); FHAD1 (33 kb)			7.364		NA	CASP9 | CTRC | DNAJC16 | EFHD2 | PLEKHM2 | SLC25A34 | SPEN | TMEM51		ACP vs. all controls	1.3435	1.22-1.48	8.07233	1.4673	1.29-1.66	7.77632	1.3134	1.16-1.49	4.34656
rs4725591	7	142399587	T	C	0.3951	0	0.98	rs17251	0.833998	FALSE	TRBV26 (3.9 kb, near_gene/Upstream gene/MODIFIER); TRBVA (9.9 kb); TRBVB (20 kb); TRBV25-1 (21 kb); TRBV27 (24 kb); TRBV28 (29 kb); PGBD4P1 (31 kb); TRBV24-1 (35 kb); TRBV23-1 (46 kb); TRBV29-1 (48 kb); TRBV22-1 (50 kb)	-0.269463	-0.20721	3.449	0.527143	NA	ENST00000390388 | ENST00000390397 | ENST00000390401 | ENST00000390418 | ENST00000390419 | EPHB6 | OR9A2 | PGBD4P1 | PRSS1 | PRSS3P1 | RP5-894A10.2 | TRBV19 | TRBV21-1 | TRBV24-1 | TRBV25-1 | TRBV27 | TRBV28 | TRBV29-1 | TRBV7-8 | U66060.1-19 | U66060.1-21 | U66060.1-23 | U66061.1-11 | unnamed		ACP vs. all controls	1.28403	1.19-1.4	8.06455	1.1909	1.06-1.3	2.5838	1.35722	1.22-1.5	7.08867
rs4726562	7	142403218	T	C	0.3951	0	0.981	rs17251	0.839461	FALSE	TRBV26 (0.29 kb, near_gene/Upstream gene/MODIFIER); TRBVA (14 kb); TRBVB (16 kb); TRBV27 (20 kb); TRBV25-1 (24 kb); TRBV28 (25 kb); PGBD4P1 (27 kb); TRBV24-1 (39 kb); TRBV29-1 (45 kb); TRBV23-1 (49 kb)	-0.50936	-0.233065	1.044	0.528694	NA	ENST00000390388 | ENST00000390397 | ENST00000390401 | ENST00000390418 | ENST00000390419 | EPHB6 | OR9A2 | PGBD4P1 | PRSS1 | PRSS3P1 | RP5-894A10.2 | TRBV19 | TRBV21-1 | TRBV24-1 | TRBV25-1 | TRBV27 | TRBV28 | TRBV29-1 | TRBV7-8 | U66060.1-19 | U66060.1-21 | U66060.1-23 | U66061.1-11 | unnamed		ACP vs. all controls	1.28353	1.19-1.4	8.04177	1.19033	1.06-1.3	2.57989	1.35501	1.22-1.5	7.0201
rs6658816	1	15767636	A	G	0.3639	0	0.979	rs6693417	0.986245	FALSE	CTRC (0 kb, intron/Intron/MODIFIER | nc-RNA/Non coding transcript/MODIFIER); EFHD2 (11 kb); CELA2A (16 kb); CELA2B (25 kb); FHAD1 (41 kb); CASP9 (50 kb)	-0.759882	-0.280506	0.143	0.129375	NA	CASP9 | CTRC | DNAJC16 | EFHD2 | PLEKHM2 | SLC25A34 | SPEN | TMEM51		ACP vs. all controls	1.2976	1.19-1.41	8.03847	1.3644	1.22-1.53	6.60112	1.2687	1.13-1.42	4.21845
rs17296	7	142403708	A	G	0.3954	0	0.981	rs17251	0.84156	FALSE	TRBV26 (0 kb, nc-exon/Non coding transcript exon/MODIFIER | nc-RNA/Non coding transcript/MODIFIER); TRBVA (14 kb); TRBVB (16 kb); TRBV27 (19 kb); TRBV25-1 (25 kb); TRBV28 (25 kb); PGBD4P1 (26 kb); TRBV24-1 (39 kb); TRBV29-1 (44 kb); TRBV23-1 (50 kb)	-0.0287177	-0.159143	3.524	0.534617	NA	ENST00000390388 | ENST00000390397 | ENST00000390401 | ENST00000390418 | ENST00000390419 | EPHB6 | OR9A2 | PGBD4P1 | PRSS1 | PRSS3P1 | RP5-894A10.2 | TRBV19 | TRBV21-1 | TRBV24-1 | TRBV25-1 | TRBV27 | TRBV28 | TRBV29-1 | TRBV7-8 | U66060.1-19 | U66060.1-21 | U66060.1-23 | U66061.1-11 | unnamed		ACP vs. all controls	1.28271	1.19-1.4	8.00389	1.18906	1.06-1.3	2.55354	1.35556	1.22-1.5	7.0372
rs10256911	7	142407888	A	T	0.3979	0	0.977	rs17251	0.847152	FALSE	TRBV26 (3.9 kb, near_gene/Downstream gene/MODIFIER); TRBVB (11 kb); TRBV27 (15 kb); TRBVA (18 kb); TRBV28 (21 kb); PGBD4P1 (22 kb); TRBV25-1 (29 kb); TRBV29-1 (40 kb); TRBV24-1 (43 kb); PRSS1 (49 kb)	-0.261896	-0.204502	7.875	0.819935	NA	ENST00000390388 | ENST00000390397 | ENST00000390401 | ENST00000390418 | ENST00000390419 | EPHB6 | OR9A2 | PGBD4P1 | PRSS1 | PRSS3P1 | RP5-894A10.2 | TRBV19 | TRBV21-1 | TRBV24-1 | TRBV25-1 | TRBV27 | TRBV28 | TRBV29-1 | TRBV7-8 | U66060.1-19 | U66060.1-21 | U66060.1-23 | U66061.1-11 | unnamed		ACP vs. all controls	1.28271	1.19-1.4	8.00389	1.1892	1.06-1.3	2.55646	1.35593	1.22-1.5	7.04861
rs6694850	1	15767536	C	T	0.347	0	0.953	rs6693417	0.949248	FALSE	CTRC (0 kb, intron/Intron/MODIFIER | nc-RNA/Non coding transcript/MODIFIER); EFHD2 (11 kb); CELA2A (16 kb); CELA2B (25 kb); FHAD1 (41 kb); CASP9 (50 kb)	-0.587105	-0.26245	0.536	0.463906	NA	CASP9 | CTRC | DNAJC16 | EFHD2 | PLEKHM2 | SLC25A34 | SPEN | TMEM51		ACP vs. all controls	1.3069	1.2-1.42	7.99615	1.3685	1.22-1.53	6.42884	1.2803	1.14-1.44	4.29216
rs57984547	7	142405063	A	G	0.3963	0	0.98	rs17251	0.845126	FALSE	TRBV26 (1.1 kb, near_gene/Downstream gene/MODIFIER); TRBVB (14 kb); TRBVA (15 kb); TRBV27 (18 kb); TRBV28 (23 kb); PGBD4P1 (25 kb); TRBV25-1 (26 kb); TRBV24-1 (40 kb); TRBV29-1 (43 kb)	-0.238123	0.402523	0.719	0.284664	NA	ENST00000390388 | ENST00000390397 | ENST00000390401 | ENST00000390418 | ENST00000390419 | EPHB6 | OR9A2 | PGBD4P1 | PRSS1 | PRSS3P1 | RP5-894A10.2 | TRBV19 | TRBV21-1 | TRBV24-1 | TRBV25-1 | TRBV27 | TRBV28 | TRBV29-1 | TRBV7-8 | U66060.1-19 | U66060.1-21 | U66060.1-23 | U66061.1-11 | unnamed		ACP vs. all controls	1.28238	1.18-1.4	7.98877	1.18892	1.06-1.3	2.55063	1.35538	1.22-1.5	7.0315
rs6952167	7	142399231	G	A	0.3967	0	0.98	rs17251	0.833572	FALSE	TRBV26 (4.3 kb, near_gene/Upstream gene/MODIFIER); TRBVA (9.5 kb); TRBVB (20 kb); TRBV25-1 (20 kb); TRBV27 (24 kb); TRBV28 (29 kb); PGBD4P1 (31 kb); TRBV24-1 (35 kb); TRBV23-1 (45 kb); TRBV29-1 (49 kb); TRBV22-1 (50 kb)	-0.575348	-0.250084	1.826	0.230322	NA	ENST00000390349 | ENST00000390351 | ENST00000390388 | ENST00000390397 | ENST00000390401 | ENST00000390418 | ENST00000390419 | EPHB6 | OR9A2 | PGBD4P1 | PRSS1 | PRSS3P1 | RP5-894A10.2 | TRBV10-1 | TRBV10-2 | TRBV19 | TRBV2 | TRBV21-1 | TRBV24-1 | TRBV25-1 | TRBV27 | TRBV28 | TRBV29-1 | TRBV4-2 | TRBV5-3 | TRBV7-3 | TRBV7-8 | TRBV8-2 | TRBV9 | U66060.1-19 | U66060.1-21 | U66060.1-23 | U66061.1-11 |…		ACP vs. all controls	1.2821	1.18-1.39	7.97591	1.1865	1.07-1.32	2.50092	1.3517	1.21-1.5	6.91758
chr16:75255077:D	16	75255077	C	CG	0.2814	0	0.896	rs8055167	0.979396	FALSE	CTRB1 (0 kb, intron/Intron/MODIFIER | near_gene/Upstream gene/MODIFIER); RP11-331F4.4 (4.9 kb, near_gene/Upstream gene/MODIFIER); BCAR1 (7.8 kb); CTRB2 (14 kb); ZFP1 (49 kb)			2.556		NA	BCAR1 | CFDP1 | CTRB1 | CTRB2 | RFWD3 | RP11-252K23.2 | TMEM170A	APLP2 | FABP5	ACP vs. all controls	1.34084	1.22-1.5	7.97328	1.39295	1.23-1.6	5.93561	1.33262	1.18-1.5	4.77577
rs62471369	7	142382864	A	G	0.3962	0	0.973	rs17251	0.828276	FALSE	TRBV25-1 (3.8 kb, near_gene/Downstream gene/MODIFIER); TRBVA (6.4 kb); TRBV24-1 (18 kb); TRBV26 (21 kb); TRBV23-1 (29 kb); TRBV22-1 (33 kb); TRBVB (36 kb); TRBV21-1 (38 kb); TRBV27 (40 kb); TRBV28 (46 kb); PGBD4P1 (47 kb); TRBV20-1 (48 kb)	-0.312781	-0.215418	1.097	0.53695	NA	ENST00000390388 | ENST00000390397 | ENST00000390401 | ENST00000390418 | ENST00000390419 | EPHB6 | OR9A2 | PGBD4P1 | PRSS1 | PRSS3P1 | RP5-894A10.2 | TRBV19 | TRBV21-1 | TRBV24-1 | TRBV25-1 | TRBV27 | TRBV28 | TRBV29-1 | TRBV7-8 | U66060.1-19 | U66060.1-21 | U66060.1-23 | U66061.1-11 | unnamed		ACP vs. all controls	1.28222	1.18-1.4	7.94565	1.18371	1.06-1.3	2.42946	1.35446	1.22-1.5	6.97985
rs76299236	7	142360483	C	A	0.3852	0	0.936	rs2226970	0.869136	FALSE	TRBV24-1 (3.7 kb, near_gene/Upstream gene/MODIFIER); TRBV23-1 (6.5 kb); TRBV22-1 (11 kb); TRBV21-1 (16 kb); TRBV25-1 (18 kb); TRBV20-1 (26 kb); TRBVA (29 kb); TRBV19 (33 kb); TRBV26 (43 kb)	0.00951724	-0.168105	6.796	0.748418	NA	ENST00000390388 | ENST00000390397 | EPHB6 | OR9A2 | PGBD4P1 | PRSS1 | PRSS3P1 | RP5-894A10.2 | TRBV19 | TRBV21-1 | TRBV24-1 | TRBV25-1 | TRBV27 | TRBV28 | TRBV29-1 | TRBV7-8 | U66060.1-19 | U66060.1-21 | U66060.1-23 | U66061.1-11 | unnamed		ACP vs. all controls	1.28667	1.19-1.4	7.93635	1.19303	1.06-1.3	2.54275	1.33941	1.2-1.5	6.33139
chr7:142481656:I	7	142481656	T	TTA	0.3171	0	0.588	chr7:142481656:I	1	TRUE	PRSS3P2 (0 kb, intron/Intron/MODIFIER | nc-RNA/Non coding transcript/MODIFIER | near_gene/Downstream gene/MODIFIER); WBP1LP1 (4.8 kb, near_gene/Downstream gene/MODIFIER); PRSS3P1 (9.9 kb); TRBJ2-1 (12 kb); TRBJ2-2 (13 kb); TRBJ2-2P (13 kb); TRBJ2-3 (13 kb); TRBJ2-4 (13 kb); TRBJ2-5 (13 kb); TRBJ2-6 (13 kb); TRBJ2-7 (13 kb); TRBC2 (17 kb); PRSS1 (21 kb); TRBV30 (29 kb); TRBV29-1 (33 kb)			7.578		0.261 Pancreatitis	C7orf34 | ENST00000390397 | ENST00000390401 | ENST00000390418 | ENST00000390419 | EPHB6 | PRSS3P1 | PRSS3P2 | TRBV19 | TRBV24-1 | TRBV28 | TRBV29-1 | U66060.1-19 | U66060.1-23 | U66061.1-11 | unnamed		ACP vs. all controls	1.4151	1.26-1.58	7.92124	1.4811	1.28-1.72	6.15973	1.5452	1.33-1.79	7.6648
rs1285594	23	106401329	C	G	0.1892	0	0.709	rs1285594	1	TRUE	NUP62CL (0 kb, intron/NMD transcript/MODIFIER | intron/Intron/MODIFIER | near_gene/Upstream gene/MODIFIER)					NA			ACP vs. all controls	1.8755	1.54-2.3	7.914	1.8853	1.41-2.5	4.39309	1.9441	1.52-2.5	6.54828
rs7809052	7	142386198	G	A	0.3964	0	0.974	rs17251	0.829136	FALSE	TRBVA (3 kb, near_gene/Upstream gene/MODIFIER); TRBV25-1 (7.1 kb); TRBV26 (17 kb); TRBV24-1 (21 kb); TRBV23-1 (32 kb); TRBVB (33 kb); TRBV22-1 (36 kb); TRBV27 (37 kb); TRBV21-1 (41 kb); TRBV28 (42 kb); PGBD4P1 (44 kb)	-0.251915	-0.12636	3.76	0.755888	NA	ENST00000390388 | ENST00000390397 | ENST00000390401 | ENST00000390418 | ENST00000390419 | EPHB6 | OR9A2 | PGBD4P1 | PRSS1 | PRSS3P1 | RP5-894A10.2 | TRBV19 | TRBV21-1 | TRBV24-1 | TRBV25-1 | TRBV27 | TRBV28 | TRBV29-1 | TRBV7-8 | U66060.1-19 | U66060.1-21 | U66060.1-23 | U66061.1-11 | unnamed		ACP vs. all controls	1.28123	1.18-1.4	7.90065	1.18357	1.06-1.3	2.42664	1.3519	1.22-1.5	6.90083
rs6953984	7	142390627	A	G	0.3955	0	0.975	rs17251	0.832589	FALSE	TRBVA (0.94 kb, near_gene/Downstream gene/MODIFIER); TRBV25-1 (12 kb); TRBV26 (13 kb); TRBV24-1 (26 kb); TRBVB (29 kb); TRBV27 (33 kb); TRBV23-1 (37 kb); TRBV28 (38 kb); PGBD4P1 (40 kb); TRBV22-1 (41 kb); TRBV21-1 (46 kb)	-0.0928511	-0.187351	7.37	0.766785	NA	ENST00000390388 | ENST00000390397 | ENST00000390401 | ENST00000390418 | ENST00000390419 | EPHB6 | OR9A2 | PGBD4P1 | PRSS1 | PRSS3P1 | RP5-894A10.2 | TRBV19 | TRBV21-1 | TRBV24-1 | TRBV25-1 | TRBV27 | TRBV28 | TRBV29-1 | TRBV7-8 | U66060.1-19 | U66060.1-21 | U66060.1-23 | U66061.1-11 | unnamed		ACP vs. all controls	1.28123	1.18-1.4	7.90065	1.18259	1.06-1.3	2.40695	1.35318	1.22-1.5	6.94026
rs6948319	7	142396847	A	G	0.3959	0	0.979	rs17251	0.834408	FALSE	TRBV26 (6.7 kb); TRBVA (7.2 kb); TRBV25-1 (18 kb); TRBVB (22 kb); TRBV27 (26 kb); TRBV28 (32 kb); TRBV24-1 (32 kb); PGBD4P1 (33 kb); TRBV23-1 (43 kb); TRBV22-1 (47 kb)	-0.833792	-0.27698	0.044	0.262506	NA	ENST00000390388 | ENST00000390397 | ENST00000390401 | ENST00000390418 | ENST00000390419 | EPHB6 | OR9A2 | PGBD4P1 | PRSS1 | PRSS3P1 | RP5-894A10.2 | TRBV10-1 | TRBV10-2 | TRBV19 | TRBV2 | TRBV21-1 | TRBV24-1 | TRBV25-1 | TRBV27 | TRBV28 | TRBV29-1 | TRBV4-2 | TRBV5-3 | TRBV7-3 | TRBV7-8 | TRBV8-2 | TRBV9 | U66060.1-19 | U66060.1-21 | U66060.1-23 | U66061.1-11 | unnamed		ACP vs. all controls	1.28025	1.18-1.4	7.89096	1.18497	1.06-1.3	2.46234	1.35245	1.22-1.5	6.94067
rs17711481	7	142328098	G	A	0.3804	0	0.874	rs2226970	0.804529	FALSE	TRBV19 (1.1 kb, near_gene/Downstream gene/MODIFIER); TRBV20-1 (6.1 kb); TRBV21-1 (16 kb); TRBV22-1 (21 kb); TRBV23-1 (25 kb); TRBV24-1 (36 kb)	-0.219049	-0.199611	1	0.531521	NA	ENST00000390388 | ENST00000390397 | EPHB6 | OR9A2 | PGBD4P1 | PRSS1 | RP5-894A10.2 | TRBV10-1 | TRBV19 | TRBV2 | TRBV21-1 | TRBV24-1 | TRBV25-1 | TRBV27 | TRBV28 | TRBV29-1 | TRBV4-2 | TRBV7-8 | U66060.1-19 | U66060.1-21 | U66060.1-23 | U66061.1-11 | unnamed		ACP vs. all controls	1.29921	1.19-1.4	7.87101	1.21818	1.09-1.4	2.88276	1.34662	1.2-1.5	6.04562
rs928943	7	142394082	C	T	0.396	0	0.977	rs17251	0.833436	FALSE	TRBVA (4.4 kb, near_gene/Downstream gene/MODIFIER); TRBV26 (9.4 kb); TRBV25-1 (15 kb); TRBVB (25 kb); TRBV27 (29 kb); TRBV24-1 (29 kb); TRBV28 (34 kb); PGBD4P1 (36 kb); TRBV23-1 (40 kb); TRBV22-1 (44 kb); TRBV21-1 (49 kb)	-0.1572	-0.188263	7.637	0.635276	NA	ENST00000390349 | ENST00000390351 | ENST00000390388 | ENST00000390397 | ENST00000390401 | ENST00000390418 | ENST00000390419 | EPHB6 | OR9A2 | PGBD4P1 | PRSS1 | PRSS3P1 | RP5-894A10.2 | TRBV10-1 | TRBV10-2 | TRBV19 | TRBV2 | TRBV21-1 | TRBV24-1 | TRBV25-1 | TRBV27 | TRBV28 | TRBV29-1 | TRBV4-2 | TRBV5-3 | TRBV7-3 | TRBV7-8 | TRBV8-2 | TRBV9 | U66060.1-19 | U66060.1-21 | U66060.1-23 | U66061.1-11 |…		ACP vs. all controls	1.28057	1.18-1.4	7.87074	1.18469	1.06-1.3	2.45664	1.35245	1.22-1.5	6.94067
rs6464512	7	142342670	C	T	0.3795	0	0.92	rs2226970	0.884877	FALSE	TRBV21-1 (1.8 kb, near_gene/Upstream gene/MODIFIER); TRBV22-1 (6.6 kb); TRBV20-1 (7.8 kb); TRBV23-1 (11 kb); TRBV19 (16 kb); TRBV24-1 (22 kb); TRBV25-1 (36 kb); TRBVA (47 kb)	-0.163934	-0.18877	2.508	0.645771	NA	ENST00000390388 | ENST00000390397 | EPHB6 | OR9A2 | PGBD4P1 | PRSS1 | PRSS3P1 | RP5-894A10.2 | TRBV19 | TRBV21-1 | TRBV24-1 | TRBV25-1 | TRBV27 | TRBV28 | TRBV29-1 | TRBV7-8 | U66060.1-19 | U66060.1-21 | U66060.1-23 | U66061.1-11 | unnamed		ACP vs. all controls	1.288	1.19-1.4	7.82312	1.1919	1.06-1.3	2.48309	1.33494	1.19-1.5	6.08287
rs6622208	23	106532393	G	C	0.1636	0	0.923	rs6622208	1	TRUE						NA			ACP vs. all controls	1.80204	1.49-2.18	7.82263	1.93154	1.48-2.52	5.30673	1.8496	1.47-2.33	6.21884
rs17711741	7	142336832	A	G	0.3718	0	0.907	rs2226970	0.860074	FALSE	TRBV20-1 (1.9 kb, near_gene/Downstream gene/MODIFIER); TRBV21-1 (7.6 kb); TRBV19 (9.8 kb); TRBV22-1 (12 kb); TRBV23-1 (17 kb); TRBV24-1 (27 kb); TRBV25-1 (42 kb)	-0.17575	-0.17302	1.56	0.566299	NA	ENST00000390388 | ENST00000390397 | EPHB6 | OR9A2 | PGBD4P1 | PRSS1 | PRSS3P1 | RP5-894A10.2 | TRBV19 | TRBV21-1 | TRBV24-1 | TRBV25-1 | TRBV27 | TRBV28 | TRBV29-1 | TRBV7-8 | U66060.1-19 | U66060.1-21 | U66060.1-23 | U66061.1-11 | unnamed		ACP vs. all controls	1.29032	1.19-1.4	7.75646	1.2025	1.08-1.4	2.6329	1.34445	1.2-1.5	6.19569
rs2107066	23	106530042	C	T	0.1716	0	0.944	rs6622208	0.97075	FALSE						NA			ACP vs. all controls	1.75669	1.46-2.11	7.75444	1.90192	1.47-2.46	5.40702	1.80876	1.45-2.26	6.22803
rs6622207	23	106530363	G	A	0.1716	0	0.944	rs6622208	0.97075	FALSE						NA			ACP vs. all controls	1.75669	1.46-2.11	7.75444	1.90192	1.47-2.46	5.40702	1.80876	1.45-2.26	6.22803
chr1:15759219:D	1	15759219	CA	C	0.3315	0	0.949	rs6693417	0.901568	FALSE	EFHD2 (2.4 kb, near_gene/Downstream gene/MODIFIER); CTRC (5.7 kb); CELA2A (24 kb); FHAD1 (32 kb); CELA2B (33 kb)			1.038		NA	CASP9 | CTRC | DNAJC16 | EFHD2 | PLEKHM2 | SLC25A34 | SPEN | TMEM51		ACP vs. all controls	1.3056	1.2-1.43	7.74751	1.3668	1.22-1.54	6.19051	1.2974	1.15-1.46	4.5947
rs17238	7	142344632	C	T	0.3799	0	0.926	rs2226970	0.885782	FALSE	TRBV21-1 (0 kb, nc-exon/Non coding transcript exon/MODIFIER | nc-RNA/Non coding transcript/MODIFIER); TRBV22-1 (4.6 kb, near_gene/Upstream gene/MODIFIER); TRBV23-1 (8.8 kb); TRBV20-1 (9.7 kb); TRBV19 (18 kb); TRBV24-1 (20 kb); TRBV25-1 (34 kb); TRBVA (45 kb)	0.467037	-0.0649655	7.544	0.53019	NA	ENST00000390388 | ENST00000390397 | EPHB6 | OR9A2 | PGBD4P1 | PRSS1 | PRSS3P1 | RP5-894A10.2 | TRBV19 | TRBV21-1 | TRBV24-1 | TRBV25-1 | TRBV27 | TRBV28 | TRBV29-1 | TRBV7-8 | U66060.1-19 | U66060.1-21 | U66060.1-23 | U66061.1-11 | unnamed		ACP vs. all controls	1.2855	1.18-1.4	7.74726	1.1898	1.07-1.33	2.45633	1.3312	1.19-1.49	6.01541
rs41307409	23	106486845	C	T	0.1583	0	0.924	rs6622208	0.975743	FALSE	PIH1D3 (0 kb, 3'utr/3 prime UTR/MODIFIER | near_gene/Downstream gene/MODIFIER)					NA			ACP vs. all controls	1.81064	1.49-2.2	7.73571	1.92183	1.47-2.52	5.114	1.86951	1.48-2.37	6.2623
chr1:15759225:D	1	15759225	GC	G	0.3315	0	0.949	rs6693417	0.901753	FALSE	EFHD2 (2.4 kb); CTRC (5.7 kb); CELA2A (24 kb); FHAD1 (32 kb); CELA2B (33 kb)			2.892		NA	CASP9 | CTRC | DNAJC16 | EFHD2 | PLEKHM2 | SLC25A34 | SPEN | TMEM51		ACP vs. all controls	1.3052	1.2-1.42	7.73122	1.3663	1.22-1.54	6.17745	1.2986	1.16-1.46	4.62349
rs1029275	7	142362131	A	T	0.376	0	0.943	rs2226970	0.877791	FALSE	TRBV24-1 (2.1 kb, near_gene/Upstream gene/MODIFIER); TRBV23-1 (8.2 kb); TRBV22-1 (12 kb); TRBV25-1 (16 kb); TRBV21-1 (17 kb); TRBVA (27 kb); TRBV20-1 (27 kb); TRBV19 (35 kb); TRBV26 (41 kb)	-0.0622951	0.282537	9.733	0.487686	NA	ENST00000390388 | ENST00000390397 | EPHB6 | OR9A2 | PGBD4P1 | PRSS1 | PRSS3P1 | RP5-894A10.2 | TRBV19 | TRBV21-1 | TRBV24-1 | TRBV25-1 | TRBV27 | TRBV28 | TRBV29-1 | TRBV7-8 | U66060.1-19 | U66060.1-21 | U66060.1-23 | U66061.1-11 | unnamed		ACP vs. all controls	1.28205	1.18-1.4	7.73016	1.19474	1.08-1.3	2.5772	1.32784	1.19-1.5	5.99685
rs6464509	7	142337855	T	C	0.3718	0	0.909	rs2226970	0.861021	FALSE	TRBV20-1 (2.9 kb, near_gene/Downstream gene/MODIFIER); TRBV21-1 (6.6 kb); TRBV19 (11 kb); TRBV22-1 (11 kb); TRBV23-1 (16 kb); TRBV24-1 (26 kb); TRBV25-1 (41 kb)	-0.245848	-0.19359	2.368	0.41804	NA	ENST00000390388 | ENST00000390397 | EPHB6 | OR9A2 | PGBD4P1 | PRSS1 | PRSS3P1 | RP5-894A10.2 | TRBV19 | TRBV21-1 | TRBV24-1 | TRBV25-1 | TRBV27 | TRBV28 | TRBV29-1 | TRBV7-8 | U66060.1-19 | U66060.1-21 | U66060.1-23 | U66061.1-11 | unnamed		ACP vs. all controls	1.28949	1.19-1.4	7.72058	1.20207	1.08-1.4	2.63196	1.34372	1.2-1.5	6.19493
rs4826956	23	106510764	G	T	0.1712	0	0.948	rs6622208	0.96382	FALSE						NA			ACP vs. all controls	1.7543	1.46-2.11	7.72025	1.87964	1.45-2.43	5.24575	1.8066	1.44-2.26	6.22514
rs7385399	7	142337826	T	G	0.3719	0	0.909	rs2226970	0.861041	FALSE	TRBV20-1 (2.9 kb, near_gene/Downstream gene/MODIFIER); TRBV21-1 (6.6 kb); TRBV19 (11 kb); TRBV22-1 (11 kb); TRBV23-1 (16 kb); TRBV24-1 (26 kb); TRBV25-1 (41 kb)	-0.187819	-0.185967	1.99	0.49717	NA	CLEC5A | ENST00000390388 | ENST00000390397 | EPHB6 | OR9A2 | PGBD4P1 | PRSS1 | PRSS3P1 | RP11-1220K2.2 | RP5-894A10.2 | TRBV10-1 | TRBV19 | TRBV2 | TRBV21-1 | TRBV24-1 | TRBV25-1 | TRBV27 | TRBV28 | TRBV29-1 | TRBV4-2 | TRBV7-8 | U66060.1-19 | U66060.1-21 | U66060.1-23 | U66061.1-11 | unnamed		ACP vs. all controls	1.28932	1.19-1.4	7.71341	1.20207	1.08-1.4	2.63196	1.34391	1.2-1.5	6.20001
rs3123	7	142344750	C	T	0.3795	0	0.926	rs2226970	0.885722	FALSE	TRBV21-1 (0 kb, nc-exon/Non coding transcript exon/MODIFIER | nc-RNA/Non coding transcript/MODIFIER); TRBV22-1 (4.5 kb, near_gene/Upstream gene/MODIFIER); TRBV23-1 (8.7 kb); TRBV20-1 (9.8 kb); TRBV19 (18 kb); TRBV24-1 (19 kb); TRBV25-1 (34 kb); TRBVA (44 kb)	0.161157	-0.122491	2.529	0.593786	NA	ENST00000390388 | ENST00000390397 | EPHB6 | OR9A2 | PGBD4P1 | PRSS1 | PRSS3P1 | RP5-894A10.2 | TRBV10-1 | TRBV10-2 | TRBV19 | TRBV21-1 | TRBV24-1 | TRBV25-1 | TRBV27 | TRBV28 | TRBV29-1 | TRBV7-8 | U66060.1-19 | U66060.1-21 | U66060.1-23 | U66061.1-11 | unnamed		ACP vs. all controls	1.28469	1.18-1.4	7.71156	1.18934	1.06-1.3	2.44736	1.33103	1.19-1.5	6.01047
rs6972116	7	142381810	A	G	0.3886	0	0.956	rs17251	0.804266	FALSE	TRBV25-1 (2.7 kb, near_gene/Downstream gene/MODIFIER); TRBVA (7.4 kb); TRBV24-1 (17 kb); TRBV26 (22 kb); TRBV23-1 (28 kb); TRBV22-1 (32 kb); TRBV21-1 (37 kb); TRBVB (37 kb); TRBV27 (41 kb); TRBV28 (47 kb); TRBV20-1 (47 kb); PGBD4P1 (48 kb)	-0.590028	-0.253528	0.037	0.485566	NA	ENST00000390388 | ENST00000390397 | ENST00000390401 | ENST00000390418 | ENST00000390419 | EPHB6 | OR9A2 | PGBD4P1 | PRSS1 | PRSS3P1 | RP5-894A10.2 | TRBV19 | TRBV21-1 | TRBV24-1 | TRBV25-1 | TRBV27 | TRBV28 | TRBV29-1 | TRBV7-8 | U66060.1-19 | U66060.1-21 | U66060.1-23 | U66061.1-11 | unnamed		ACP vs. all controls	1.28107	1.18-1.4	7.68643	1.17302	1.05-1.3	2.17272	1.35373	1.22-1.5	6.77678
rs10871306	16	75254680	C	G	0.2949	0	0.922	rs8055167	0.937706	FALSE	CTRB1 (0 kb, intron/Intron/MODIFIER | near_gene/Upstream gene/MODIFIER); BCAR1 (8.2 kb); CTRB2 (14 kb); ZFP1 (49 kb)	-0.272056	-0.211037	0.429	0.698902	NA	BCAR1 | CFDP1 | CTRB1 | CTRB2 | RFWD3 | RP11-252K23.2 | TMEM170A	APLP2 | FABP5	ACP vs. all controls	1.31839	1.2-1.4	7.63687	1.3816	1.22-1.6	6.07449	1.31718	1.16-1.5	4.74758
rs77808099	1	15944932	T	C	0.0575	0	0.89	rs77808099	1	TRUE	DDI2 (0 kb, intron/Intron/MODIFIER | nc-RNA/Non coding transcript/MODIFIER); RP4-680D5.4 (3.6 kb, near_gene/Upstream gene/MODIFIER); CHCHD2P6 (13 kb); DNAJC16 (26 kb); AGMAT (33 kb); RSC1A1 (41 kb)	0.262283	2.44987	5.898	0.797314	NA	AGMAT | CASP9 | CROCCP3 | DNAJC16 | PLEKHM2 | RP11-288I21.1 | RSC1A1 | SLC25A34	CD97	ACP vs. all controls	1.63106	1.39-1.9	7.56228	1.61316	1.28-2	3.98152	1.66417	1.33-2.1	4.70792
rs144021110	1	15860038	A	G	0.0569	0	0.849	rs4645995	0.875587	FALSE	DNAJC16 (0 kb, intron/NMD transcript/MODIFIER | intron/Intron/MODIFIER); CASP9 (7 kb); AGMAT (39 kb); CELA2B (42 kb)	-0.536382	-0.25092	0.457	0.646164	NA	AGMAT | CASP9 | CROCCP3 | CTRC | DNAJC16 | PLEKHM2 | RP11-288I21.1 | RSC1A1 | SLC25A34	CD97	ACP vs. all controls	1.65645	1.41-2	7.55012	1.66583	1.32-2.1	4.1751	1.65289	1.32-2.1	4.38061
rs10927786	1	15772057	G	T	0.3438	0	0.951	rs6693417	0.909555	FALSE	CTRC (0 kb, intron/Intron/MODIFIER | nc-RNA/Non coding transcript/MODIFIER | near_gene/Downstream gene/MODIFIER); CELA2A (11 kb); EFHD2 (15 kb); CELA2B (20 kb); FHAD1 (45 kb); CASP9 (45 kb)	0.0156524	-0.00590105	1.84	0.809678	NA	CASP9 | CTRC | DNAJC16 | EFHD2 | PLEKHM2 | SLC25A34 | SPEN | TMEM51		ACP vs. all controls	1.2951	1.19-1.41	7.53833	1.3837	1.23-1.55	6.80258	1.271	1.13-1.43	4.07326
rs6973496	7	142381965	A	C	0.3899	0	0.955	rs17251	0.800042	FALSE	TRBV25-1 (2.9 kb, near_gene/Downstream gene/MODIFIER); TRBVA (7.3 kb); TRBV24-1 (17 kb); TRBV26 (22 kb); TRBV23-1 (28 kb); TRBV22-1 (32 kb); TRBV21-1 (37 kb); TRBVB (37 kb); TRBV27 (41 kb); TRBV28 (47 kb); TRBV20-1 (47 kb); PGBD4P1 (48 kb)	-0.359454	-0.228342	2.054	0.217666	NA	ENST00000390388 | ENST00000390397 | ENST00000390401 | ENST00000390418 | ENST00000390419 | EPHB6 | OR9A2 | PGBD4P1 | PRSS1 | PRSS3P1 | RP5-894A10.2 | TRBV19 | TRBV21-1 | TRBV24-1 | TRBV25-1 | TRBV27 | TRBV28 | TRBV29-1 | TRBV7-8 | U66060.1-19 | U66060.1-21 | U66060.1-23 | U66061.1-11 | unnamed		ACP vs. all controls	1.27747	1.18-1.4	7.52749	1.1744	1.05-1.3	2.19891	1.3541	1.22-1.5	6.78778
rs8045196	16	75256360	G	T	0.2363	0	0.894	rs8055167	0.809144	FALSE	CTRB1 (0 kb, intron/Intron/MODIFIER | near_gene/Upstream gene/MODIFIER); RP11-331F4.4 (3.6 kb, near_gene/Upstream gene/MODIFIER); BCAR1 (6.6 kb); CTRB2 (15 kb)	0.317369	1.73803	2.745	0.704317	NA	BCAR1 | CFDP1 | CTRB1 | CTRB2 | RFWD3 | RP11-252K23.2 | TMEM170A	APLP2 | FABP5	ACP vs. all controls	1.35373	1.22-1.5	7.52063	1.39567	1.22-1.6	5.37236	1.33014	1.16-1.5	4.25608
rs12557888	23	106550889	C	T	0.1796	0	0.957	rs6622208	0.913398	FALSE						NA			ACP vs. all controls	1.71165	1.43-2.05	7.51593	1.91601	1.49-2.46	5.81497	1.72029	1.38-2.14	5.60967
rs6622210	23	106554377	T	C	0.1792	0	0.955	rs6622208	0.912861	FALSE						NA			ACP vs. all controls	1.71348	1.43-2.05	7.51329	1.91795	1.49-2.47	5.81492	1.72187	1.39-2.14	5.60847
chrX:106513406:D	23	106513406	AAAG	A	0.1727	0	0.953	rs6622208	0.954857	FALSE						NA			ACP vs. all controls	1.72791	1.44-2.08	7.48825	1.85722	1.44-2.4	5.12482	1.76996	1.42-2.21	5.93558
rs6523938	23	106514832	T	A	0.1729	0	0.952	rs6622208	0.957468	FALSE	MYCL2 (0.98 kb, near_gene/Upstream gene/MODIFIER)					NA			ACP vs. all controls	1.72975	1.44-2.08	7.48559	1.85804	1.44-2.4	5.1313	1.77183	1.42-2.21	5.95526
rs4826957	23	106516125	G	C	0.1729	0	0.952	rs6622208	0.957468	FALSE	MYCL2 (0 kb, nc-exon/Non coding transcript exon/MODIFIER | nc-RNA/Non coding transcript/MODIFIER)					0.25 Electrodermal activity			ACP vs. all controls	1.72975	1.44-2.08	7.48559	1.85804	1.44-2.4	5.1313	1.77183	1.42-2.21	5.95526
rs12556407	23	106513279	G	A	0.1728	0	0.953	rs6622208	0.954844	FALSE	MYCL2 (2.5 kb, near_gene/Upstream gene/MODIFIER)					NA			ACP vs. all controls	1.72765	1.44-2.07	7.48444	1.85722	1.44-2.4	5.12482	1.7697	1.42-2.21	5.93277
rs2189241	23	106561125	G	T	0.1798	0	0.958	rs6622208	0.912412	FALSE						NA			ACP vs. all controls	1.70616	1.43-2.04	7.4638	1.91158	1.49-2.46	5.79411	1.71348	1.38-2.13	5.53645
rs5962391	23	106517951	T	C	0.1726	0	0.952	rs6622208	0.959118	FALSE	MYCL2 (1.1 kb, near_gene/Downstream gene/MODIFIER)					NA			ACP vs. all controls	1.7266	1.44-2.07	7.44011	1.85205	1.43-2.39	5.08384	1.77422	1.42-2.21	5.96161
rs6523940	23	106520804	T	C	0.1724	0	0.953	rs6622208	0.959192	FALSE	MYCL2 (3.9 kb, near_gene/Downstream gene/MODIFIER)					NA			ACP vs. all controls	1.72607	1.44-2.07	7.43254	1.85205	1.43-2.39	5.08384	1.77529	1.42-2.22	5.97284
rs8051363	16	75255217	G	A	0.2436	0	0.907	rs8055167	0.841847	FALSE	CTRB1 (0 kb, intron/Intron/MODIFIER | near_gene/Upstream gene/MODIFIER); RP11-331F4.4 (4.8 kb, near_gene/Upstream gene/MODIFIER); BCAR1 (7.7 kb); CTRB2 (14 kb); ZFP1 (49 kb)	-0.639414	-0.266193	0.609	0.345484	0.24 Type 1 diabetes	BCAR1 | CFDP1 | CTRB1 | CTRB2 | RFWD3 | RP11-252K23.2 | TMEM170A	APLP2 | FABP5	ACP vs. all controls	1.343	1.22-1.5	7.42444	1.38947	1.22-1.6	5.42679	1.32293	1.16-1.5	4.25627
rs58958250	23	106541157	T	C	0.1784	0	0.953	rs6622208	0.918944	FALSE						NA			ACP vs. all controls	1.71139	1.43-2.05	7.42298	1.92016	1.49-2.47	5.81717	1.71741	1.38-2.14	5.50732
rs5962820	23	106541606	G	A	0.1784	0	0.953	rs6622208	0.918941	FALSE						NA			ACP vs. all controls	1.71139	1.43-2.05	7.42298	1.92016	1.49-2.47	5.81717	1.71741	1.38-2.14	5.50732
rs4826958	23	106526443	C	T	0.1746	0	0.953	rs6622208	0.955603	FALSE						NA			ACP vs. all controls	1.71846	1.43-2.06	7.40952	1.8717	1.45-2.42	5.28276	1.75589	1.41-2.19	5.84291
chrX:106479193:D	23	106479193	CAAAAAT	C	0.1579	0	0.911	rs6622208	0.903877	FALSE						NA			ACP vs. all controls	1.78356	1.47-2.17	7.40775	1.92654	1.47-2.53	5.0827	1.84199	1.46-2.33	6.03348
rs2343180	23	106515111	T	A	0.1743	0	0.957	rs6622208	0.949937	FALSE	MYCL2 (0.7 kb, near_gene/Upstream gene/MODIFIER)					NA			ACP vs. all controls	1.7161	1.43-2.06	7.40429	1.84987	1.43-2.39	5.12207	1.75271	1.41-2.18	5.8278
rs5962390	23	106470713	C	G	0.1684	0	0.964	rs6622208	0.936838	FALSE	PIH1D3 (0 kb, intron/Intron/MODIFIER)					NA			ACP vs. all controls	1.72344	1.43-2.07	7.36598	1.87827	1.45-2.43	5.27768	1.78703	1.43-2.23	6.07757
rs67864005	23	106512659	C	T	0.1744	0	0.959	rs6622208	0.946867	FALSE	MYCL2 (3.2 kb, near_gene/Upstream gene/MODIFIER)					NA			ACP vs. all controls	1.71086	1.43-2.05	7.35692	1.84797	1.43-2.38	5.12082	1.7461	1.4-2.17	5.77599
rs2189242	23	106568181	G	C	0.1805	0	0.942	rs6622208	0.901667	FALSE						NA			ACP vs. all controls	1.70851	1.43-2.05	7.35149	1.87608	1.46-2.42	5.42135	1.71191	1.37-2.13	5.41437
rs5962818	23	106536956	T	A	0.1765	0	0.948	rs6622208	0.948929	FALSE						NA			ACP vs. all controls	1.70877	1.43-2.05	7.32636	1.86377	1.44-2.4	5.24785	1.74716	1.4-2.18	5.78725
chrX:106517502:D	23	106517502	GTA	G	0.1586	0	0.744	chrX:106517502:D	1	TRUE						NA			ACP vs. all controls	1.88074	1.52-2.33	7.32305	2.05808	1.53-2.78	5.12061	1.85532	1.44-2.4	5.2503
rs2107065	23	106518559	G	T	0.1743	0	0.957	rs6622208	0.951064	FALSE	MYCL2 (1.7 kb, near_gene/Downstream gene/MODIFIER)					NA			ACP vs. all controls	1.70956	1.43-2.05	7.309	1.84281	1.43-2.38	5.06558	1.75006	1.4-2.18	5.79965
rs6523944	23	106544070	C	A	0.1806	0	0.96	rs6622208	0.909329	FALSE						NA			ACP vs. all controls	1.69156	1.42-2.02	7.3044	1.90468	1.48-2.45	5.76846	1.69755	1.37-2.11	5.41831
rs6622177	23	106434261	G	A	0.1607	0	0.953	rs6622208	0.950461	FALSE	NUP62CL (0 kb, intron/NMD transcript/MODIFIER | intron/Intron/MODIFIER)					NA			ACP vs. all controls	1.74795	1.45-2.11	7.28745	1.89255	1.45-2.46	5.15106	1.81225	1.44-2.28	6.03422
rs5962810	23	106503480	G	A	0.1697	0	0.959	rs6622208	0.942074	FALSE						NA			ACP vs. all controls	1.71793	1.43-2.06	7.28713	1.84688	1.43-2.39	5.00223	1.77076	1.42-2.21	5.90638
rs6622199	23	106514805	A	T	0.1751	0	0.959	rs6622208	0.945143	FALSE	MYCL2 (1 kb, near_gene/Upstream gene/MODIFIER)					NA			ACP vs. all controls	1.70407	1.42-2.04	7.28646	1.84389	1.43-2.38	5.10208	1.74002	1.4-2.17	5.74815
rs2880558	23	106515141	C	G	0.1751	0	0.959	rs6622208	0.945146	FALSE	MYCL2 (0.67 kb, near_gene/Upstream gene/MODIFIER)					NA			ACP vs. all controls	1.70407	1.42-2.04	7.28646	1.84389	1.43-2.38	5.10208	1.74002	1.4-2.17	5.74815
rs5962813	23	106516786	T	A	0.1751	0	0.959	rs6622208	0.945146	FALSE	MYCL2 (0 kb, nc-exon/Non coding transcript exon/MODIFIER | nc-RNA/Non coding transcript/MODIFIER)					NA			ACP vs. all controls	1.70407	1.42-2.04	7.28646	1.84389	1.43-2.38	5.10208	1.74002	1.4-2.17	5.74815
rs4826955	23	106496024	C	T	0.1697	0	0.959	rs6622208	0.941942	FALSE						NA			ACP vs. all controls	1.71741	1.43-2.06	7.27964	1.84688	1.43-2.39	5.00223	1.7705	1.42-2.21	5.90358
rs5962799	23	106428804	C	T	0.1748	0	0.976	rs6622208	0.901722	FALSE	NUP62CL (0 kb, intron/NMD transcript/MODIFIER | intron/Intron/MODIFIER)					NA			ACP vs. all controls	1.69364	1.42-2.03	7.27716	1.85668	1.44-2.39	5.33615	1.73581	1.4-2.15	5.8337
rs2189240	23	106522955	C	A	0.1746	0	0.959	rs6622208	0.948371	FALSE						NA			ACP vs. all controls	1.70303	1.42-2.04	7.27119	1.83928	1.43-2.37	5.05119	1.74689	1.4-2.17	5.80302
rs6622178	23	106434655	T	G	0.1605	0	0.952	rs6622208	0.951572	FALSE	NUP62CL (0 kb, intron/NMD transcript/MODIFIER | intron/Intron/MODIFIER)					NA			ACP vs. all controls	1.74848	1.45-2.11	7.26725	1.89613	1.46-2.47	5.16457	1.81199	1.44-2.28	5.99445
rs6622190	23	106493227	T	C	0.1708	0	0.961	rs6622208	0.925969	FALSE						NA			ACP vs. all controls	1.71165	1.43-2.06	7.25369	1.85178	1.43-2.39	5.06793	1.75775	1.41-2.19	5.82534
chrX:106527798:I	23	106527798	G	GA	0.1717	0	0.943	rs6622208	0.954526	FALSE						NA			ACP vs. all controls	1.71951	1.43-2.07	7.25313	1.87224	1.45-2.42	5.20159	1.74742	1.4-2.18	5.60925
chrX:106452501:D	23	106452501	TA	T	0.179	0	0.956	rs6622208	0.887187	FALSE						NA			ACP vs. all controls	1.6939	1.42-2.03	7.25207	1.87745	1.46-2.42	5.46281	1.73765	1.4-2.16	5.83487
rs67685317	23	106534198	A	G	0.1755	0	0.956	rs6622208	0.948977	FALSE						NA			ACP vs. all controls	1.70146	1.42-2.04	7.2483	1.8635	1.44-2.4	5.26006	1.73607	1.39-2.16	5.68759
rs72618353	23	106507552	A	T	0.1705	0	0.959	rs6622208	0.937147	FALSE						NA			ACP vs. all controls	1.71322	1.43-2.06	7.24795	1.85069	1.43-2.39	5.04568	1.75987	1.41-2.2	5.81068
rs6616639	23	106511217	G	A	0.1751	0	0.96	rs6622208	0.942124	FALSE	MYCL2 (4.6 kb, near_gene/Upstream gene/MODIFIER)					NA			ACP vs. all controls	1.69911	1.42-2.04	7.24257	1.84253	1.43-2.38	5.09117	1.73396	1.39-2.16	5.68338
rs7061361	23	106511348	C	A	0.1751	0	0.96	rs6622208	0.942124	FALSE	MYCL2 (4.5 kb, near_gene/Upstream gene/MODIFIER)					NA			ACP vs. all controls	1.69911	1.42-2.04	7.24257	1.84253	1.43-2.38	5.09117	1.73396	1.39-2.16	5.68338
rs6616638	23	106475646	C	A	0.1699	0	0.959	rs6622208	0.941479	FALSE	PIH1D3 (0 kb, intron/Intron/MODIFIER)					NA			ACP vs. all controls	1.71453	1.43-2.06	7.23848	1.84552	1.43-2.39	5.00508	1.76624	1.41-2.2	5.87759
rs6622193	23	106505275	G	A	0.171	0	0.962	rs6622208	0.934177	FALSE						NA			ACP vs. all controls	1.70825	1.42-2.05	7.23305	1.84715	1.43-2.39	5.04512	1.75536	1.41-2.19	5.81869
rs6622194	23	106505452	C	T	0.171	0	0.962	rs6622208	0.934176	FALSE						NA			ACP vs. all controls	1.70825	1.42-2.05	7.23305	1.84715	1.43-2.39	5.04512	1.75536	1.41-2.19	5.81869
rs5962811	23	106503865	G	A	0.17	0	0.959	rs6622208	0.941376	FALSE						NA			ACP vs. all controls	1.714	1.43-2.06	7.23101	1.84607	1.43-2.39	5.00935	1.76544	1.41-2.2	5.86921
rs2298179	23	106449643	G	T	0.1684	0	0.97	rs6622208	0.927882	FALSE	NUP62CL (0 kb, 5'utr/5 prime UTR/MODIFIER | intron/NMD transcript/MODIFIER); PIH1D3 (0.22 kb, near_gene/Upstream gene/MODIFIER); Y_RNA (3.7 kb, near_gene/Downstream gene/MODIFIER)					NA			ACP vs. all controls	1.70929	1.42-2.05	7.21987	1.86869	1.45-2.41	5.24429	1.77236	1.42-2.21	5.97991
rs6523933	23	106445470	T	C	0.1687	0	0.977	rs6622208	0.923394	FALSE	NUP62CL (0 kb, intron/NMD transcript/MODIFIER | intron/Intron/MODIFIER); Y_RNA (0.34 kb, near_gene/Upstream gene/MODIFIER); PIH1D3 (4.4 kb, near_gene/Upstream gene/MODIFIER)					NA			ACP vs. all controls	1.70485	1.42-2.05	7.21231	1.86213	1.44-2.4	5.24904	1.76996	1.42-2.21	6.01192
rs6616629	23	106372870	A	G	0.1615	0	0.963	rs6622208	0.940528	FALSE	NUP62CL (0 kb, intron/NMD transcript/MODIFIER | intron/Intron/MODIFIER); RP13-383K5.4 (2 kb, near_gene/Upstream gene/MODIFIER)					NA			ACP vs. all controls	1.73633	1.44-2.1	7.2109	1.88046	1.45-2.44	5.14064	1.80284	1.44-2.26	6.01351
rs17254	7	142364553	A	G	0.3814	0	0.969	rs2226970	0.879771	FALSE	TRBV24-1 (0 kb, exon/Missense/MODERATE); TRBV23-1 (11 kb); TRBV25-1 (14 kb); TRBV22-1 (15 kb); TRBV21-1 (20 kb); TRBVA (25 kb); TRBV20-1 (30 kb); TRBV19 (38 kb); TRBV26 (39 kb)	0.119644	-0.158126	12.8	0.934575	NA	ENST00000390388 | ENST00000390397 | EPHB6 | OR9A2 | PGBD4P1 | PRSS1 | PRSS3P1 | RP5-894A10.2 | TRBV19 | TRBV21-1 | TRBV24-1 | TRBV25-1 | TRBV27 | TRBV28 | TRBV29-1 | TRBV7-8 | U66060.1-19 | U66060.1-21 | U66060.1-23 | U66061.1-11 | unnamed		ACP vs. all controls	1.26582	1.16-1.4	7.21004	1.17841	1.05-1.3	2.31674	1.31354	1.18-1.5	5.75743
rs5962817	23	106533311	T	C	0.1773	0	0.951	rs6622208	0.943536	FALSE						NA			ACP vs. all controls	1.69651	1.42-2.03	7.2044	1.85613	1.44-2.39	5.21492	1.73791	1.4-2.16	5.70724
rs757182	23	106518132	G	T	0.175	0	0.959	rs6622208	0.946266	FALSE	MYCL2 (1.2 kb, near_gene/Downstream gene/MODIFIER)					NA			ACP vs. all controls	1.69781	1.42-2.03	7.19501	1.83684	1.42-2.37	5.04544	1.73765	1.4-2.16	5.72277
rs2275789	23	106396189	A	G	0.1688	0	0.982	rs6622208	0.916411	FALSE	NUP62CL (0 kb, intron/NMD transcript/MODIFIER | intron/Intron/MODIFIER | near_gene/Downstream gene/MODIFIER)					NA			ACP vs. all controls	1.70068	1.42-2.04	7.18013	1.85559	1.44-2.39	5.22486	1.76784	1.42-2.2	6.02776
rs57057885	23	106513422	A	T	0.18	0	0.942	rs6622208	0.92895	FALSE	MYCL2 (2.4 kb, near_gene/Upstream gene/MODIFIER)					NA			ACP vs. all controls	1.69182	1.41-2.03	7.16416	1.81522	1.41-2.34	4.91269	1.72056	1.38-2.14	5.5585
rs1885643	23	106485244	A	T	0.1713	0	0.964	rs6622208	0.934222	FALSE	PIH1D3 (0 kb, intron/Intron/MODIFIER)					NA			ACP vs. all controls	1.7012	1.42-2.04	7.15956	1.83792	1.42-2.38	4.98575	1.74716	1.4-2.18	5.75035
rs6622188	23	106491179	G	A	0.1713	0	0.964	rs6622208	0.934213	FALSE	PIH1D3 (3.7 kb, near_gene/Downstream gene/MODIFIER)					NA			ACP vs. all controls	1.7012	1.42-2.04	7.15956	1.83765	1.42-2.37	4.98361	1.74689	1.4-2.18	5.74755
rs6652956	23	106570721	A	G	0.1823	0	0.948	rs6622208	0.892815	FALSE						NA			ACP vs. all controls	1.68532	1.41-2.02	7.1537	1.85722	1.45-2.39	5.34067	1.68039	1.35-2.09	5.1839
rs113512906	23	106665912	G	C	0.186	0	0.847	rs6622208	0.857503	FALSE						NA			ACP vs. all controls	1.73475	1.44-2.1	7.1351	1.8605	1.43-2.42	4.89586	1.74636	1.39-2.19	5.37721
rs4826963	23	106602662	C	T	0.167	0	0.961	rs6622208	0.908447	FALSE						NA			ACP vs. all controls	1.72056	1.43-2.07	7.12952	1.85695	1.43-2.41	5.02683	1.74504	1.39-2.19	5.4982
rs2886944	7	142404177	G	A	0.0575	0	0.941	rs2886944	1	TRUE	TRBV26 (0.18 kb, near_gene/Downstream gene/MODIFIER); TRBVA (14 kb); TRBVB (15 kb); TRBV27 (19 kb); TRBV28 (24 kb); TRBV25-1 (25 kb); PGBD4P1 (26 kb); TRBV24-1 (39 kb); TRBV29-1 (44 kb)	-0.257712	-0.154155	4.298	0.620442	NA	ENST00000390388 | ENST00000390397 | EPHB6 | TRBV19 | U66060.1-19 | U66060.1-23 | U66061.1-11 | unnamed		ACP vs. all controls	1.7788	1.46-2.17	7.12187	1.7644	1.37-2.27	4.50715	1.7685	1.38-2.27	4.71473
rs5962837	23	106669728	A	G	0.1949	0	0.851	rs6622208	0.830251	FALSE	KRT18P49 (2.1 kb, near_gene/Upstream gene/MODIFIER); AL035088.1 (2.5 kb, near_gene/Upstream gene/MODIFIER)					NA			ACP vs. all controls	1.70485	1.42-2.05	7.10067	1.81387	1.4-2.35	4.71944	1.73159	1.39-2.16	5.49839
rs5962838	23	106670528	C	T	0.1949	0	0.851	rs6622208	0.830246	FALSE	KRT18P49 (1.3 kb, near_gene/Upstream gene/MODIFIER); AL035088.1 (1.7 kb, near_gene/Upstream gene/MODIFIER)					NA			ACP vs. all controls	1.70485	1.42-2.05	7.10067	1.81387	1.4-2.35	4.71944	1.73133	1.39-2.16	5.49566
rs1285599	23	106403549	A	G	0.1755	0	0.987	rs6622208	0.887272	FALSE	NUP62CL (0 kb, intron/NMD transcript/MODIFIER | intron/Intron/MODIFIER)					NA			ACP vs. all controls	1.67314	1.4-2	7.08625	1.83305	1.43-2.35	5.21325	1.73502	1.4-2.15	5.90179
rs6622185	23	106469429	T	C	0.1702	0	0.977	rs6622208	0.920044	FALSE	PIH1D3 (0 kb, intron/Intron/MODIFIER)					NA			ACP vs. all controls	1.68948	1.41-2.02	7.07376	1.85205	1.44-2.39	5.19616	1.74293	1.4-2.17	5.77923
rs6523957	23	106648370	T	A	0.194	0	0.864	rs6622208	0.834737	FALSE						NA			ACP vs. all controls	1.69755	1.41-2.04	7.05164	1.81845	1.41-2.35	4.8062	1.7161	1.38-2.14	5.37247
rs1936015	23	106467752	T	C	0.1705	0	0.977	rs6622208	0.919269	FALSE	PIH1D3 (0 kb, intron/Intron/MODIFIER)					NA			ACP vs. all controls	1.6874	1.41-2.02	7.04356	1.8515	1.44-2.39	5.20606	1.73844	1.4-2.16	5.73123
chrX:106477335:I	23	106477335	G	GTTGAGCTTACTC	0.172	0	0.965	rs6622208	0.929604	FALSE	PIH1D3 (0 kb, intron/Intron/MODIFIER)					NA			ACP vs. all controls	1.68922	1.41-2.03	7.04222	1.83115	1.42-2.36	4.95911	1.73502	1.39-2.16	5.67638
rs6622141	23	106309583	T	C	0.1593	0	0.965	rs6622208	0.929117	FALSE	RBM41 (0 kb, 3'utr/3 prime UTR/MODIFIER | intron/NMD transcript/MODIFIER | intron/Intron/MODIFIER | near_gene/Downstream gene/MODIFIER)					NA			ACP vs. all controls	1.72791	1.43-2.09	7.0422	1.82223	1.4-2.37	4.63422	1.81926	1.45-2.28	6.14285
rs11092589	23	106496735	C	T	0.1721	0	0.966	rs6622208	0.92945	FALSE						NA			ACP vs. all controls	1.68896	1.41-2.03	7.03846	1.8325	1.42-2.37	4.96986	1.73423	1.39-2.16	5.66797
rs5962808	23	106498561	C	A	0.1721	0	0.966	rs6622208	0.92945	FALSE						NA			ACP vs. all controls	1.68896	1.41-2.03	7.03846	1.8325	1.42-2.37	4.96986	1.73423	1.39-2.16	5.66797
rs5962809	23	106501206	A	G	0.1721	0	0.966	rs6622208	0.929451	FALSE						NA			ACP vs. all controls	1.68896	1.41-2.03	7.03846	1.8325	1.42-2.37	4.96986	1.73423	1.39-2.16	5.66797
rs6418252	23	106662084	T	G	0.1946	0	0.856	rs6622208	0.831048	FALSE						NA			ACP vs. all controls	1.69833	1.41-2.04	7.03538	1.80903	1.4-2.34	4.69462	1.7266	1.38-2.16	5.46398
rs5962803	23	106453729	A	C	0.1703	0	0.977	rs6622208	0.91959	FALSE	PIH1D3 (0 kb, intron/Intron/MODIFIER); NUP62CL (4.1 kb, near_gene/Upstream gene/MODIFIER)					NA			ACP vs. all controls	1.68662	1.41-2.02	7.03225	1.84933	1.44-2.38	5.17412	1.74108	1.4-2.17	5.75944
rs6616626	23	106330973	A	G	0.1596	0	0.964	rs6622208	0.931035	FALSE	RBM41 (0 kb, intron/NMD transcript/MODIFIER | intron/Intron/MODIFIER | near_gene/Downstream gene/MODIFIER)					NA			ACP vs. all controls	1.7266	1.43-2.09	7.02439	1.83467	1.41-2.39	4.72735	1.81522	1.45-2.28	6.10175
rs6622227	23	106664828	G	C	0.1945	0	0.855	rs6622208	0.830975	FALSE						NA			ACP vs. all controls	1.69755	1.41-2.04	7.02425	1.80741	1.4-2.34	4.68216	1.72633	1.38-2.16	5.46126
rs6616627	23	106345512	G	A	0.1595	0	0.964	rs6622208	0.931071	FALSE	RBM41 (0 kb, intron/NMD transcript/MODIFIER | intron/Intron/MODIFIER | nc-RNA/Non coding transcript/MODIFIER)					NA			ACP vs. all controls	1.72633	1.43-2.09	7.02083	1.83332	1.41-2.39	4.7172	1.81522	1.45-2.28	6.10175
chr16:75251097:D	16	75251097	A	AG	0.3205	0	0.952	rs8055167	0.824203	FALSE	CTRB1 (1.8 kb); CTRB2 (10 kb); BCAR1 (12 kb); ZFP1 (45 kb)			0.023		0.212 Type 1 diabetes	BCAR1 | CFDP1 | CTRB1 | CTRB2 | RFWD3 | RP11-252K23.2 | TMEM170A | ZFP1 | ZNRF1	APLP2 | FABP5	ACP vs. all controls	1.288	1.18-1.4	7.01428	1.33958	1.19-1.5	5.44433	1.3101	1.16-1.5	4.87374
chrX:106392776:D	23	106392776	AG	A	0.1332	0	0.79	chrX:106392776:D	1	TRUE						NA			ACP vs. all controls	1.91878	1.53-2.41	7.00964	2.19306	1.61-2.99	5.55683	1.97768	1.51-2.6	5.64424
rs17777717	7	142491575	C	G	0.1873	0	0.796	rs17777717	1	TRUE	TRBJ2-1 (2.5 kb, near_gene/Upstream gene/MODIFIER); TRBJ2-2 (2.7 kb, near_gene/Upstream gene/MODIFIER); TRBJ2-2P (2.8 kb, near_gene/Upstream gene/MODIFIER); TRBJ2-3 (3 kb, near_gene/Upstream gene/MODIFIER); TRBJ2-4 (3.1 kb, near_gene/Upstream gene/MODIFIER); TRBJ2-5 (3.2 kb, near_gene/Upstream gene/MODIFIER); TRBJ2-6 (3.3 kb, near_gene/Upstream gene/MODIFIER); TRBJ2-7 (3.6 kb, near_gene/Upstream …	0.476503	2.3694	0.677	0.450873	0.218 Pancreatitis	C7orf34 | ENST00000390397 | ENST00000390401 | ENST00000390418 | ENST00000390419 | EPHB6 | KEL | PRSS1 | PRSS3P1 | PRSS3P2 | TRBV19 | TRBV24-1 | TRBV28 | TRBV29-1 | U66060.1-19 | U66060.1-23 | U66061.1-11 | unnamed		ACP vs. all controls	1.3678	1.22-1.5	7.00088	1.38255	1.19-1.6	4.32093	1.38389	1.19-1.6	4.48236
rs6622176	23	106429554	T	C	0.1708	0	0.984	rs6622208	0.912217	FALSE	NUP62CL (0 kb, intron/NMD transcript/MODIFIER | intron/Intron/MODIFIER)					NA			ACP vs. all controls	1.67832	1.4-2.01	6.99437	1.83846	1.43-2.37	5.12849	1.73449	1.4-2.16	5.76286
rs5962801	23	106435176	T	A	0.1704	0	0.982	rs6622208	0.914558	FALSE	NUP62CL (0 kb, intron/NMD transcript/MODIFIER | intron/Intron/MODIFIER)					NA			ACP vs. all controls	1.68013	1.4-2.01	6.9932	1.84009	1.43-2.37	5.14175	1.73502	1.4-2.16	5.7314
rs2275790	23	106436162	C	A	0.1704	0	0.982	rs6622208	0.914558	FALSE	NUP62CL (0 kb, intron/NMD transcript/MODIFIER | intron/Intron/MODIFIER)					NA			ACP vs. all controls	1.68013	1.4-2.01	6.9932	1.84009	1.43-2.37	5.14175	1.73502	1.4-2.16	5.7314
rs7065510	23	106438426	A	G	0.1704	0	0.982	rs6622208	0.914558	FALSE	NUP62CL (0 kb, intron/NMD transcript/MODIFIER | intron/Intron/MODIFIER)					NA			ACP vs. all controls	1.68013	1.4-2.01	6.9932	1.84009	1.43-2.37	5.14175	1.73502	1.4-2.16	5.7314
rs1343212	23	106440550	C	T	0.1704	0	0.982	rs6622208	0.914558	FALSE	NUP62CL (0 kb, intron/NMD transcript/MODIFIER | intron/Intron/MODIFIER)					NA			ACP vs. all controls	1.68013	1.4-2.01	6.9932	1.84009	1.43-2.37	5.14175	1.73502	1.4-2.16	5.7314
rs5962385	23	106444086	T	C	0.1704	0	0.982	rs6622208	0.914566	FALSE	NUP62CL (0 kb, intron/NMD transcript/MODIFIER | intron/Intron/MODIFIER); Y_RNA (1.7 kb, near_gene/Upstream gene/MODIFIER)					NA			ACP vs. all controls	1.67988	1.4-2.01	6.98942	1.84009	1.43-2.37	5.14175	1.73475	1.4-2.16	5.72857
rs6616633	23	106444749	C	T	0.1704	0	0.982	rs6622208	0.914566	FALSE	NUP62CL (0 kb, intron/NMD transcript/MODIFIER | intron/Intron/MODIFIER); Y_RNA (1.1 kb, near_gene/Upstream gene/MODIFIER)					NA			ACP vs. all controls	1.67988	1.4-2.01	6.98942	1.84009	1.43-2.37	5.14175	1.73475	1.4-2.16	5.72857
rs5962389	23	106468398	A	G	0.1721	0	0.983	rs6622208	0.911525	FALSE	PIH1D3 (0 kb, intron/Intron/MODIFIER)					NA			ACP vs. all controls	1.67599	1.4-2.01	6.98793	1.84579	1.44-2.37	5.21705	1.72029	1.39-2.14	5.62784
rs1883737	23	106676601	A	T	0.1963	0	0.851	rs6622208	0.826227	FALSE	KRT18P49 (3.9 kb, near_gene/Downstream gene/MODIFIER); AL035088.1 (4.3 kb, near_gene/Downstream gene/MODIFIER)					NA			ACP vs. all controls	1.69494	1.41-2.04	6.98723	1.83007	1.41-2.37	4.88396	1.71453	1.37-2.14	5.35622
chrX:106464187:D	23	106464187	TTTTC	T	0.1743	0	0.926	rs6622208	0.895492	FALSE						NA			ACP vs. all controls	1.69677	1.41-2.04	6.98597	1.83034	1.41-2.37	4.87293	1.78303	1.43-2.23	6.05452
rs137885186	23	106667650	A	G	0.1961	0	0.849	rs6622208	0.826312	FALSE	KRT18P49 (4.2 kb, near_gene/Upstream gene/MODIFIER); AL035088.1 (4.6 kb, near_gene/Upstream gene/MODIFIER)					NA			ACP vs. all controls	1.69468	1.41-2.04	6.98353	1.80607	1.39-2.34	4.67178	1.72975	1.39-2.16	5.47935
rs2018004	23	106658706	C	T	0.1942	0	0.858	rs6622208	0.837413	FALSE						NA			ACP vs. all controls	1.69416	1.41-2.04	6.97613	1.8279	1.41-2.37	4.85395	1.72266	1.38-2.15	5.42322
rs3747403	23	106450525	A	G	0.1722	0	0.984	rs6622208	0.911044	FALSE	PIH1D3 (0 kb, 5'utr/5 prime UTR/MODIFIER | intron/Intron/MODIFIER); NUP62CL (0.86 kb, near_gene/Upstream gene/MODIFIER); Y_RNA (4.6 kb, near_gene/Downstream gene/MODIFIER)					NA			ACP vs. all controls	1.67314	1.4-2	6.97382	1.84308	1.43-2.37	5.19476	1.71872	1.38-2.13	5.61086
rs6523935	23	106461527	G	T	0.1722	0	0.984	rs6622208	0.911047	FALSE	PIH1D3 (0 kb, intron/Intron/MODIFIER)					NA			ACP vs. all controls	1.67314	1.4-2	6.97382	1.84308	1.43-2.37	5.19476	1.71872	1.38-2.13	5.61086
rs144781335	23	106668396	T	C	0.1935	0	0.852	rs6622208	0.833522	FALSE	KRT18P49 (3.5 kb, near_gene/Upstream gene/MODIFIER); AL035088.1 (3.8 kb, near_gene/Upstream gene/MODIFIER)					NA			ACP vs. all controls	1.69703	1.41-2.04	6.96264	1.81064	1.4-2.35	4.68199	1.71951	1.38-2.15	5.35687
rs2473355	1	15750217	A	G	0.3719	2	1	rs2473355	1	TRUE	EFHD2 (0 kb, intron/Intron/MODIFIER); CTRC (15 kb); FHAD1 (23 kb); CELA2A (33 kb); CELA2B (42 kb)	-0.0863435	0.202227	3.57	0.352172	NA	CASP9 | CTRC | DNAJC16 | EFHD2 | PLEKHM2 | SLC25A34 | SPEN		ACP vs. all controls	1.2678	1.17-1.38	6.95468	1.3076	1.17-1.46	5.16532	1.3102	1.17-1.46	5.36095
rs4826967	23	106664667	C	A	0.196	0	0.855	rs6622208	0.827048	FALSE						NA			ACP vs. all controls	1.6887	1.41-2.03	6.95256	1.82574	1.41-2.36	4.86324	1.70956	1.37-2.13	5.32165
rs6622222	23	106636303	G	A	0.1698	0	0.942	rs6622208	0.885758	FALSE						NA			ACP vs. all controls	1.70773	1.42-2.06	6.95161	1.84742	1.42-2.4	4.91342	1.73133	1.38-2.17	5.34327
chrX:106673373:D	23	106673373	AACATTG	A	0.1956	0	0.852	rs6622208	0.827916	FALSE						NA			ACP vs. all controls	1.69156	1.41-2.03	6.9392	1.80607	1.4-2.34	4.68431	1.71479	1.37-2.14	5.35892
rs7884579	23	106665865	C	T	0.1957	0	0.854	rs6622208	0.826738	FALSE						NA			ACP vs. all controls	1.68896	1.41-2.03	6.92922	1.82763	1.41-2.36	4.86493	1.70956	1.37-2.13	5.32165
rs6622225	23	106658153	G	A	0.1957	0	0.862	rs6622208	0.832402	FALSE						NA			ACP vs. all controls	1.68506	1.4-2.02	6.92765	1.81872	1.41-2.35	4.8213	1.71558	1.38-2.14	5.41829
rs5962795	23	106423943	A	T	0.1716	0	0.988	rs6622208	0.909157	FALSE	NUP62CL (0 kb, intron/NMD transcript/MODIFIER | intron/Intron/MODIFIER)					NA			ACP vs. all controls	1.67159	1.4-2	6.92342	1.83982	1.43-2.36	5.19682	1.72082	1.39-2.14	5.6518
rs6622173	23	106426519	C	T	0.1723	0	0.989	rs6622208	0.905917	FALSE	NUP62CL (0 kb, intron/NMD transcript/MODIFIER | intron/Intron/MODIFIER)					NA			ACP vs. all controls	1.66771	1.39-1.99	6.92149	1.83521	1.43-2.36	5.15884	1.71296	1.38-2.13	5.58482
rs6523945	23	106566618	G	A	0.1846	0	0.952	rs6622208	0.888534	FALSE						NA			ACP vs. all controls	1.66023	1.39-1.98	6.92125	1.83819	1.43-2.36	5.2563	1.64994	1.33-2.05	4.94287
chrX:106439040:D	23	106439040	AC	A	0.1723	0	0.99	rs6622208	0.9058	FALSE						NA			ACP vs. all controls	1.66746	1.39-1.99	6.91769	1.83494	1.43-2.36	5.15661	1.71296	1.38-2.13	5.58482
rs12390148	23	106405296	T	C	0.1731	0	0.997	rs6622208	0.896061	FALSE	NUP62CL (0 kb, intron/NMD transcript/MODIFIER | intron/Intron/MODIFIER)					NA			ACP vs. all controls	1.66178	1.39-1.98	6.91653	1.82709	1.42-2.34	5.14912	1.7059	1.38-2.11	5.58065
rs6622169	23	106406361	G	A	0.1731	0	0.997	rs6622208	0.896061	FALSE	NUP62CL (0 kb, intron/NMD transcript/MODIFIER | intron/Intron/MODIFIER)					NA			ACP vs. all controls	1.66178	1.39-1.98	6.91653	1.82709	1.42-2.34	5.14912	1.7059	1.38-2.11	5.58065
rs5962793	23	106398655	G	A	0.1708	0	0.99	rs6622208	0.906037	FALSE	NUP62CL (0 kb, intron/NMD transcript/MODIFIER | intron/Intron/MODIFIER | near_gene/Upstream gene/MODIFIER)					NA			ACP vs. all controls	1.67081	1.4-2	6.91205	1.83088	1.42-2.35	5.12318	1.72817	1.39-2.15	5.71306
rs4726572	7	142424843	C	A	0.0581	2	1	rs2886944	0.88253	FALSE	TRBV27 (1.2 kb, near_gene/Downstream gene/MODIFIER); TRBV28 (3.6 kb, near_gene/Upstream gene/MODIFIER); TRBVB (5.1 kb); PGBD4P1 (5.3 kb); TRBV26 (21 kb); TRBV29-1 (23 kb); PRSS1 (32 kb); TRBVA (35 kb); PRSS3P1 (43 kb); TRBV25-1 (46 kb)	-0.550845	-0.172051	3.636	0.463925	NA	ENST00000390388 | ENST00000390397 | EPHB6 | TRBV19 | U66060.1-19 | U66060.1-23 | U66061.1-11 | unnamed		ACP vs. all controls	1.7296	1.43-2.1	6.90827	1.7278	1.35-2.21	4.43983	1.7121	1.34-2.18	4.50295
rs6523923	23	106374887	G	C	0.1708	0	0.99	rs6622208	0.905851	FALSE	NUP62CL (0 kb, intron/NMD transcript/MODIFIER | intron/Intron/MODIFIER); RP13-383K5.4 (0 kb, near_gene/Upstream gene/MODIFIER)					NA			ACP vs. all controls	1.67056	1.4-2	6.90827	1.82899	1.42-2.35	5.09346	1.72817	1.39-2.15	5.71306
rs6523924	23	106385336	T	G	0.1708	0	0.99	rs6622208	0.905852	FALSE	NUP62CL (0 kb, intron/NMD transcript/MODIFIER | intron/Intron/MODIFIER)					NA			ACP vs. all controls	1.67056	1.4-2	6.90827	1.82899	1.42-2.35	5.10761	1.72817	1.39-2.15	5.71306
rs2051094	23	106411286	C	A	0.1708	0	0.99	rs6622208	0.905835	FALSE	NUP62CL (0 kb, intron/NMD transcript/MODIFIER | intron/Intron/MODIFIER)					NA			ACP vs. all controls	1.6703	1.4-2	6.90448	1.83061	1.42-2.35	5.12096	1.72791	1.39-2.15	5.71021
chrX:106425803:D	23	106425803	TA	T	0.1715	0	0.986	rs6622208	0.910982	FALSE						NA			ACP vs. all controls	1.66978	1.4-2	6.89692	1.83657	1.43-2.36	5.15566	1.71898	1.38-2.14	5.61369
rs5962807	23	106465367	G	A	0.1728	0	0.985	rs6622208	0.907167	FALSE	PIH1D3 (0 kb, intron/Intron/MODIFIER)					NA			ACP vs. all controls	1.66565	1.39-1.99	6.89105	1.84118	1.43-2.37	5.19356	1.71008	1.38-2.12	5.55363
rs6523959	23	106659713	G	A	0.1956	0	0.861	rs6622208	0.833203	FALSE						NA			ACP vs. all controls	1.68221	1.4-2.02	6.8868	1.81818	1.41-2.35	4.81707	1.70668	1.37-2.13	5.32553
rs5962794	23	106423926	C	T	0.1736	0	0.99	rs6622208	0.899796	FALSE	NUP62CL (0 kb, intron/NMD transcript/MODIFIER | intron/Intron/MODIFIER)					NA			ACP vs. all controls	1.66126	1.39-1.98	6.88123	1.84036	1.43-2.36	5.24499	1.70564	1.38-2.11	5.55959
chrX:106527804:I	23	106527804	A	AT	0.1129	0	0.711	chrX:106527804:I	1	TRUE						NA			ACP vs. all controls	2.07245	1.61-2.68	6.87756	2.3636	1.66-3.36	5.25868	2.11702	1.56-2.87	5.46736
chrX:106438035:D	23	106438035	TTCTC	T	0.1723	0	0.97	rs6622208	0.905362	FALSE						NA			ACP vs. all controls	1.67392	1.4-2.01	6.87548	1.82655	1.42-2.35	5.01778	1.72633	1.39-2.15	5.6201
chrX:106438038:D	23	106438038	TCTC	T	0.1723	0	0.97	rs6622208	0.905362	FALSE						NA			ACP vs. all controls	1.67392	1.4-2.01	6.87548	1.82655	1.42-2.35	5.01778	1.72633	1.39-2.15	5.6201
rs62470635	7	142426770	C	T	0.0579	0	0.994	rs2886944	0.885481	FALSE	TRBV28 (1.7 kb, near_gene/Upstream gene/MODIFIER); TRBV27 (3.1 kb, near_gene/Downstream gene/MODIFIER); PGBD4P1 (3.4 kb, near_gene/Upstream gene/MODIFIER); TRBVB (7 kb); TRBV29-1 (21 kb); TRBV26 (23 kb); PRSS1 (31 kb); TRBVA (37 kb); PRSS3P1 (41 kb); TRBV25-1 (48 kb)	-0.106514	-0.179822	8.88	0.27604	NA	ENST00000390388 | ENST00000390397 | EPHB6 | TRBV19 | U66060.1-19 | U66060.1-23 | U66061.1-11 | unnamed		ACP vs. all controls	1.7299	1.43-2.1	6.87389	1.7244	1.35-2.21	4.3872	1.7134	1.34-2.19	4.49503
rs2343826	23	106642059	G	A	0.1963	0	0.869	rs6622208	0.832598	FALSE						NA			ACP vs. all controls	1.67547	1.4-2.01	6.87088	1.79909	1.39-2.32	4.71853	1.69989	1.36-2.12	5.28847
rs6622150	23	106333020	G	T	0.167	0	0.986	rs6622208	0.905613	FALSE	RBM41 (0 kb, intron/NMD transcript/MODIFIER | intron/Intron/MODIFIER | nc-RNA/Non coding transcript/MODIFIER)					NA			ACP vs. all controls	1.6791	1.4-2.01	6.86915	1.80231	1.4-2.32	4.7698	1.76996	1.42-2.2	6.03126
rs5962802	23	106441385	C	T	0.1717	0	0.986	rs6622208	0.904989	FALSE	NUP62CL (0 kb, intron/NMD transcript/MODIFIER | intron/Intron/MODIFIER); Y_RNA (4.4 kb, near_gene/Upstream gene/MODIFIER)					NA			ACP vs. all controls	1.66565	1.39-1.99	6.86368	1.83603	1.43-2.36	5.15121	1.70851	1.38-2.12	5.5009
rs5962386	23	106451968	C	A	0.1719	0	0.981	rs6622208	0.906138	FALSE	PIH1D3 (0 kb, intron/Intron/MODIFIER); NUP62CL (2.3 kb, near_gene/Upstream gene/MODIFIER)					NA			ACP vs. all controls	1.66746	1.39-2	6.8629	1.84199	1.43-2.37	5.15723	1.71243	1.38-2.13	5.54309
rs62471390	7	142389723	C	T	0.0598	0	0.913	rs2886944	0.979867	FALSE	TRBVA (0.032 kb, near_gene/Downstream gene/MODIFIER); TRBV25-1 (11 kb); TRBV26 (14 kb); TRBV24-1 (25 kb); TRBVB (29 kb); TRBV27 (33 kb); TRBV23-1 (36 kb); TRBV28 (39 kb); TRBV22-1 (40 kb); PGBD4P1 (40 kb); TRBV21-1 (45 kb)	0.174134	-0.114098	5.77	0.619192	NA	ENST00000390388 | ENST00000390397 | EPHB6 | TRBV19 | U66060.1-19 | U66060.1-23 | U66061.1-11 | unnamed		ACP vs. all controls	1.7504	1.44-2.13	6.86253	1.751	1.36-2.25	4.42538	1.7566	1.37-2.26	4.63575
rs2179628	23	106677881	G	C	0.0661	0	0.545	rs2179628	1	TRUE						0.208 Pancreatitis		PDGFD	ACP vs. all controls	2.49491	1.82-3.4	6.86214	4.05659	2.38-6.7	6.1097	2.53399	1.69-3.8	4.82825
rs7049908	23	106379044	T	A	0.1727	0	0.998	rs6622208	0.896967	FALSE	NUP62CL (0 kb, intron/NMD transcript/MODIFIER | intron/Intron/MODIFIER); RP13-383K5.4 (3.6 kb, near_gene/Downstream gene/MODIFIER)					NA			ACP vs. all controls	1.65791	1.39-1.98	6.85903	1.82412	1.42-2.34	5.12442	1.7059	1.38-2.11	5.58065
rs6523925	23	106389108	T	C	0.1727	0	0.998	rs6622208	0.896967	FALSE	NUP62CL (0 kb, intron/NMD transcript/MODIFIER | intron/Intron/MODIFIER)					NA			ACP vs. all controls	1.65791	1.39-1.98	6.85903	1.82412	1.42-2.34	5.12442	1.7059	1.38-2.11	5.58065
rs1035539	16	75276775	A	G	0.3241	0	0.955	rs1035539	1	TRUE	BCAR1 (0 kb, exon/Missense/MODERATE | 3'utr/3 prime UTR/MODIFIER | intron/NMD transcript/MODIFIER | intron/Intron/MODIFIER | near_gene/Downstream gene/MODIFIER | near_gene/Upstream gene/MODIFIER); CTRB1 (18 kb); CTRB2 (36 kb); CFDP1 (51 kb)	-0.55998	-0.499578	0.037	0.749855	NA	BCAR1 | CFDP1 | CTRB1 | CTRB2 | RFWD3 | RP11-252K23.2 | TMEM170A | ZFP1 | ZNRF1	APLP2 | FABP5	ACP vs. all controls	1.28254	1.18-1.4	6.85764	1.33869	1.19-1.5	5.43832	1.29719	1.15-1.4	4.61686
rs17163638	7	142426331	C	T	0.0579	0	0.995	rs2886944	0.885487	FALSE	TRBV28 (2.2 kb, near_gene/Upstream gene/MODIFIER); TRBV27 (2.6 kb, near_gene/Downstream gene/MODIFIER); PGBD4P1 (3.9 kb, near_gene/Upstream gene/MODIFIER); TRBVB (6.6 kb); TRBV29-1 (22 kb); TRBV26 (22 kb); PRSS1 (31 kb); TRBVA (37 kb); PRSS3P1 (42 kb); TRBV25-1 (47 kb)	0.284357	-0.116392	10.1	0.704396	NA	ENST00000390388 | ENST00000390397 | EPHB6 | TRBV19 | U66060.1-19 | U66060.1-23 | U66061.1-11 | unnamed		ACP vs. all controls	1.7286	1.43-2.1	6.85678	1.7233	1.35-2.21	4.37819	1.7119	1.34-2.19	4.48218
rs11645191	16	75274980	G	A	0.3144	0	0.967	rs1035539	0.967136	FALSE	BCAR1 (0 kb, intron/NMD transcript/MODIFIER | intron/Intron/MODIFIER | near_gene/Downstream gene/MODIFIER | near_gene/Upstream gene/MODIFIER); CTRB1 (16 kb); CTRB2 (34 kb); CFDP1 (53 kb)	-0.204362	0.654352	0.962	0.402039	NA	BCAR1 | CFDP1 | CTRB1 | CTRB2 | RFWD3 | RP11-252K23.2 | TMEM170A | ZFP1 | ZNRF1	APLP2 | FABP5	ACP vs. all controls	1.2832	1.18-1.4	6.8554	1.32188	1.18-1.5	5.02589	1.29534	1.15-1.4	4.58599
rs5962792	23	106398526	A	G	0.1728	0	0.998	rs6622208	0.896861	FALSE	NUP62CL (0 kb, intron/NMD transcript/MODIFIER | intron/Intron/MODIFIER | near_gene/Upstream gene/MODIFIER)					NA			ACP vs. all controls	1.65766	1.39-1.98	6.85521	1.82493	1.42-2.34	5.14553	1.70537	1.38-2.11	5.57492
rs6523928	23	106410003	C	G	0.1728	0	0.998	rs6622208	0.896861	FALSE	NUP62CL (0 kb, intron/NMD transcript/MODIFIER | intron/Intron/MODIFIER)					NA			ACP vs. all controls	1.65766	1.39-1.98	6.85521	1.82493	1.42-2.34	5.14553	1.70537	1.38-2.11	5.57492
rs6523956	23	106647577	A	G	0.1964	0	0.868	rs6622208	0.832768	FALSE						NA			ACP vs. all controls	1.67625	1.4-2.01	6.85512	1.79935	1.39-2.32	4.72064	1.70016	1.37-2.12	5.2912
rs4826949	23	106308293	G	A	0.1667	0	0.987	rs6622208	0.903601	FALSE	RBM41 (0 kb, 3'utr/3 prime UTR/MODIFIER | near_gene/Downstream gene/MODIFIER)					NA			ACP vs. all controls	1.67988	1.4-2.02	6.85344	1.79131	1.39-2.31	4.66996	1.77342	1.42-2.21	6.06846
rs1296382	23	106428082	A	G	0.172	0	0.988	rs6622208	0.900168	FALSE	NUP62CL (0 kb, intron/NMD transcript/MODIFIER | intron/Intron/MODIFIER)					NA			ACP vs. all controls	1.66307	1.39-1.99	6.85306	1.84199	1.43-2.37	5.20026	1.70929	1.38-2.12	5.54514
rs6622171	23	106414433	A	G	0.1728	0	0.997	rs6622208	0.896872	FALSE	NUP62CL (0 kb, intron/NMD transcript/MODIFIER | intron/Intron/MODIFIER)					NA			ACP vs. all controls	1.6574	1.39-1.98	6.85138	1.82466	1.42-2.34	5.1289	1.70511	1.38-2.11	5.57206
rs6622172	23	106422864	G	T	0.1731	0	0.993	rs6622208	0.899904	FALSE	NUP62CL (0 kb, intron/NMD transcript/MODIFIER | intron/Intron/MODIFIER)					NA			ACP vs. all controls	1.6592	1.39-1.98	6.85069	1.8363	1.43-2.36	5.21116	1.70459	1.38-2.11	5.54818
rs5962834	23	106652137	G	C	0.1957	0	0.863	rs6622208	0.830737	FALSE						NA			ACP vs. all controls	1.67962	1.4-2.02	6.84974	1.80231	1.39-2.33	4.70557	1.70303	1.37-2.12	5.27078
rs5962804	23	106453798	A	G	0.1729	0	0.986	rs6622208	0.906691	FALSE	PIH1D3 (0 kb, intron/Intron/MODIFIER); NUP62CL (4.1 kb, near_gene/Upstream gene/MODIFIER)					NA			ACP vs. all controls	1.66281	1.39-1.99	6.84927	1.83874	1.43-2.36	5.18788	1.70851	1.38-2.12	5.53665
rs4826953	23	106455396	C	T	0.1729	0	0.986	rs6622208	0.906693	FALSE	PIH1D3 (0 kb, intron/Intron/MODIFIER)					NA			ACP vs. all controls	1.66281	1.39-1.99	6.84927	1.83874	1.43-2.36	5.18788	1.70851	1.38-2.12	5.53665
rs4826954	23	106455417	G	A	0.1729	0	0.986	rs6622208	0.906693	FALSE	PIH1D3 (0 kb, intron/Intron/MODIFIER)					NA			ACP vs. all controls	1.66281	1.39-1.99	6.84927	1.83874	1.43-2.36	5.18788	1.70851	1.38-2.12	5.53665
rs5962806	23	106459810	T	G	0.1729	0	0.986	rs6622208	0.906713	FALSE	PIH1D3 (0 kb, intron/Intron/MODIFIER)					NA			ACP vs. all controls	1.66281	1.39-1.99	6.84927	1.83874	1.43-2.36	5.18788	1.70851	1.38-2.12	5.53665
rs6523920	23	106360086	C	A	0.1702	0	0.988	rs6622208	0.904794	FALSE	RBM41 (0 kb, intron/NMD transcript/MODIFIER | intron/Intron/MODIFIER | near_gene/Upstream gene/MODIFIER)					NA			ACP vs. all controls	1.66797	1.39-2	6.8433	1.81549	1.41-2.34	4.96927	1.73054	1.39-2.15	5.73872
rs5962786	23	106360882	G	T	0.1702	0	0.988	rs6622208	0.904794	FALSE	RBM41 (0 kb, intron/NMD transcript/MODIFIER | intron/Intron/MODIFIER | near_gene/Upstream gene/MODIFIER)					NA			ACP vs. all controls	1.66797	1.39-2	6.8433	1.81549	1.41-2.34	4.96927	1.73054	1.39-2.15	5.73872
rs6622156	23	106369866	A	G	0.1703	0	0.988	rs6622208	0.904819	FALSE	NUP62CL (0 kb, intron/NMD transcript/MODIFIER | intron/Intron/MODIFIER)					NA			ACP vs. all controls	1.66797	1.39-2	6.8433	1.81603	1.41-2.34	4.97366	1.73028	1.39-2.15	5.73587
rs5962388	23	106466923	T	C	0.1731	0	0.979	rs6622208	0.909598	FALSE	PIH1D3 (0 kb, intron/Intron/MODIFIER)					NA			ACP vs. all controls	1.6641	1.39-1.99	6.84098	1.83413	1.43-2.36	5.12143	1.70956	1.38-2.12	5.53001
rs5962822	23	106583310	C	T	0.1841	0	0.959	rs6622208	0.878081	FALSE						NA			ACP vs. all controls	1.65482	1.39-1.98	6.84056	1.80177	1.4-2.31	4.93931	1.65405	1.33-2.05	5.00269
rs1682052	23	106427312	C	T	0.1729	0	0.992	rs6622208	0.901612	FALSE	NUP62CL (0 kb, intron/NMD transcript/MODIFIER | intron/Intron/MODIFIER)					NA			ACP vs. all controls	1.65843	1.39-1.98	6.83925	1.83169	1.43-2.35	5.1585	1.70381	1.37-2.11	5.5216
rs1285600	23	106430824	T	C	0.1729	0	0.992	rs6622208	0.901612	FALSE	NUP62CL (0 kb, intron/NMD transcript/MODIFIER | intron/Intron/MODIFIER)					NA			ACP vs. all controls	1.65843	1.39-1.98	6.83925	1.83169	1.43-2.35	5.1585	1.70381	1.37-2.11	5.5216
chrX:106420257:I	23	106420257	C	CTA	0.1724	0	0.994	rs6622208	0.900303	FALSE	NUP62CL (0 kb, intron/NMD transcript/MODIFIER | intron/Intron/MODIFIER)					NA			ACP vs. all controls	1.66023	1.39-1.98	6.83857	1.82953	1.43-2.35	5.15494	1.70956	1.38-2.12	5.58419
rs1120690	23	106654383	T	C	0.1983	0	0.869	rs6622208	0.826303	FALSE						NA			ACP vs. all controls	1.66901	1.39-2	6.8313	1.81576	1.41-2.34	4.89017	1.68403	1.35-2.09	5.17238
rs143917804	23	106694486	C	T	0.0667	0	0.547	rs2179628	0.982433	FALSE						NA		PDGFD	ACP vs. all controls	2.47532	1.79-3.4	6.83062	4.25827	2.5-7.1	6.47107	2.4552	1.64-3.7	4.61311
rs6523931	23	106444209	G	A	0.1727	0	0.99	rs6622208	0.901626	FALSE	NUP62CL (0 kb, intron/NMD transcript/MODIFIER | intron/Intron/MODIFIER); Y_RNA (1.6 kb, near_gene/Upstream gene/MODIFIER)					NA			ACP vs. all controls	1.65946	1.39-1.98	6.82717	1.83386	1.43-2.36	5.16203	1.70564	1.38-2.12	5.54148
rs5962397	23	106652012	C	T	0.1954	0	0.861	rs6622208	0.830934	FALSE						NA			ACP vs. all controls	1.67988	1.4-2.02	6.82676	1.79962	1.39-2.33	4.6594	1.70511	1.37-2.13	5.29242
rs4826952	23	106440053	G	A	0.1729	0	0.991	rs6622208	0.90151	FALSE	NUP62CL (0 kb, intron/NMD transcript/MODIFIER | intron/Intron/MODIFIER)					NA			ACP vs. all controls	1.65714	1.39-1.98	6.82019	1.83061	1.43-2.35	5.14954	1.70276	1.37-2.11	5.51024
rs5962384	23	106443958	A	T	0.1729	0	0.991	rs6622208	0.90151	FALSE	NUP62CL (0 kb, intron/NMD transcript/MODIFIER | intron/Intron/MODIFIER); Y_RNA (1.8 kb, near_gene/Upstream gene/MODIFIER)					NA			ACP vs. all controls	1.65714	1.39-1.98	6.82019	1.83061	1.43-2.35	5.14954	1.70276	1.37-2.11	5.51024
rs6523932	23	106444464	C	G	0.1729	0	0.991	rs6622208	0.90151	FALSE	NUP62CL (0 kb, intron/NMD transcript/MODIFIER | intron/Intron/MODIFIER); Y_RNA (1.3 kb, near_gene/Upstream gene/MODIFIER)					NA			ACP vs. all controls	1.65714	1.39-1.98	6.82019	1.83061	1.43-2.35	5.14954	1.70276	1.37-2.11	5.51024
rs6616634	23	106445186	T	G	0.1729	0	0.991	rs6622208	0.901511	FALSE	NUP62CL (0 kb, intron/NMD transcript/MODIFIER | intron/Intron/MODIFIER); Y_RNA (0.62 kb, near_gene/Upstream gene/MODIFIER); PIH1D3 (4.7 kb, near_gene/Upstream gene/MODIFIER)					NA			ACP vs. all controls	1.65714	1.39-1.98	6.82019	1.83061	1.43-2.35	5.14954	1.70276	1.37-2.11	5.51024
rs5962790	23	106378921	G	A	0.1718	0	0.982	rs6622208	0.9053	FALSE	NUP62CL (0 kb, intron/NMD transcript/MODIFIER | intron/Intron/MODIFIER); RP13-383K5.4 (3.4 kb, near_gene/Downstream gene/MODIFIER)					NA			ACP vs. all controls	1.66436	1.39-1.99	6.81765	1.82277	1.42-2.34	5.04255	1.72187	1.39-2.14	5.64485
rs1285579	23	106407238	T	C	0.1736	0	0.998	rs6622208	0.892325	FALSE	NUP62CL (0 kb, intron/NMD transcript/MODIFIER | intron/Intron/MODIFIER)					NA			ACP vs. all controls	1.65328	1.38-1.97	6.81757	1.82439	1.42-2.34	5.15546	1.69755	1.37-2.1	5.52536
rs10787903	10	120823969	T	C	0.4106	0	0.972	rs10787903	1	TRUE	EIF3A (0 kb, intron/Intron/MODIFIER | near_gene/Upstream gene/MODIFIER); SNORA19 (3.3 kb, near_gene/Upstream gene/MODIFIER); SNORA19 (4.3 kb, near_gene/Upstream gene/MODIFIER); NANOS1 (30 kb); FAM45A (40 kb)			9.976	0.859226	NA	BAG3 | C10orf84 | EIF3A | FAM45A | FAM45B | GRK5 | INPP5F | NANOS1 | PRDX3 | RP11-435O11.2 | SFXN4 | SNORA19 | unnamed	ZMIZ1	ACP vs. all controls	1.2575	1.16-1.36	6.81706	1.2892	1.16-1.44	4.79603	1.2901	1.16-1.44	5.01493
rs17837475	7	142389219	C	T	0.0597	0	0.905	rs2886944	0.975541	FALSE	TRBVA (0.018 kb, near_gene/Upstream gene/MODIFIER); TRBV25-1 (10 kb); TRBV26 (14 kb); TRBV24-1 (25 kb); TRBVB (30 kb); TRBV27 (34 kb); TRBV23-1 (35 kb); TRBV28 (39 kb); TRBV22-1 (40 kb); PGBD4P1 (41 kb); TRBV21-1 (44 kb)	-0.133486	-0.186804	5.289	0.676884	NA	ENST00000390388 | ENST00000390397 | EPHB6 | TRBV19 | U66060.1-19 | U66060.1-23 | U66061.1-11 | unnamed		ACP vs. all controls	1.7515	1.44-2.13	6.81471	1.7465	1.36-2.25	4.35409	1.7474	1.36-2.25	4.51634
rs5962787	23	106362675	A	G	0.1722	0	0.995	rs6622208	0.896177	FALSE	RBM41 (0.62 kb, near_gene/Upstream gene/MODIFIER); NUP62CL (4 kb, near_gene/Downstream gene/MODIFIER)					NA			ACP vs. all controls	1.65663	1.39-1.98	6.81258	1.81199	1.41-2.33	4.99585	1.70956	1.38-2.12	5.60244
chrX:106405061:I	23	106405061	G	GA	0.1732	0	0.991	rs6622208	0.898122	FALSE	NUP62CL (0 kb, intron/NMD transcript/MODIFIER | intron/Intron/MODIFIER)					NA			ACP vs. all controls	1.65663	1.39-1.98	6.81258	1.82709	1.42-2.34	5.14912	1.69963	1.37-2.11	5.49411
rs5962833	23	106650516	C	T	0.1975	0	0.865	rs6622208	0.824649	FALSE						NA			ACP vs. all controls	1.67107	1.39-2	6.80747	1.81656	1.41-2.34	4.86998	1.68636	1.35-2.1	5.16386
rs731521	7	142386873	G	T	0.0595	0	0.908	rs2886944	0.974792	FALSE	TRBVA (2.4 kb, near_gene/Upstream gene/MODIFIER); TRBV25-1 (7.8 kb); TRBV26 (17 kb); TRBV24-1 (22 kb); TRBVB (32 kb); TRBV23-1 (33 kb); TRBV27 (36 kb); TRBV22-1 (37 kb); TRBV28 (42 kb); TRBV21-1 (42 kb); PGBD4P1 (43 kb)	-0.125245	-0.187937	7.706	0.611076	NA	ENST00000390388 | ENST00000390397 | EPHB6 | TRBV19 | U66060.1-19 | U66060.1-23 | U66061.1-11 | unnamed		ACP vs. all controls	1.7498	1.44-2.13	6.80554	1.7472	1.36-2.25	4.35958	1.7471	1.36-2.25	4.52007
rs1954365	23	106462267	C	T	0.1726	0	0.984	rs6622208	0.906269	FALSE	PIH1D3 (0 kb, intron/Intron/MODIFIER)					NA			ACP vs. all controls	1.66126	1.39-1.99	6.79943	1.84172	1.43-2.37	5.19802	1.71113	1.38-2.12	5.56497
rs5962382	23	106360805	T	C	0.1721	0	0.996	rs6622208	0.895968	FALSE	RBM41 (0 kb, intron/NMD transcript/MODIFIER | intron/Intron/MODIFIER | near_gene/Upstream gene/MODIFIER)					NA			ACP vs. all controls	1.6574	1.39-1.98	6.7968	1.8101	1.41-2.32	4.98035	1.71086	1.38-2.12	5.61675
rs62470644	7	142453213	G	A	0.253	0	0.761	rs62470644	1	TRUE	PRSS1 (4.1 kb, near_gene/Upstream gene/MODIFIER); TRBV29-1 (4.5 kb, near_gene/Downstream gene/MODIFIER); PRSS3P1 (15 kb); PGBD4P1 (23 kb); TRBV28 (24 kb); PRSS3P2 (25 kb); TRBV27 (30 kb); WBP1LP1 (33 kb); TRBVB (33 kb); TRBJ2-1 (41 kb); TRBJ2-2 (41 kb); TRBJ2-2P (41 kb); TRBJ2-3 (41 kb); TRBJ2-4 (41 kb); TRBJ2-5 (42 kb); TRBJ2-6 (42 kb); TRBJ2-7 (42 kb); TRBC2 (46 kb); TRBV26 (49 kb)	-0.0379615	-0.0821095	3.782	0.752622	NA	ENST00000390388 | ENST00000390397 | EPHB6 | OR9A2 | PGBD4P1 | PRSS1 | RP5-894A10.2 | TRBV19 | TRBV21-1 | TRBV24-1 | TRBV25-1 | TRBV27 | TRBV28 | TRBV29-1 | TRBV7-8 | U66060.1-19 | U66060.1-21 | U66060.1-23 | U66061.1-11 | unnamed		ACP vs. all controls	1.33014	1.2-1.5	6.79258	1.29099	1.12-1.5	3.32912	1.4497	1.27-1.7	6.33289
rs2880703	23	106659138	G	A	0.1963	0	0.865	rs6622208	0.829591	FALSE						NA			ACP vs. all controls	1.67185	1.39-2	6.79194	1.8101	1.4-2.34	4.77955	1.69859	1.36-2.12	5.27485
chrX:106681003:D	23	106681003	A	ATGATGATGATGATGG	0.0649	0	0.551	rs2179628	0.99657	FALSE						NA		PDGFD	ACP vs. all controls	2.4847	1.79-3.4	6.79127	4.0961	2.44-7.1	6.14482	2.52674	1.69-3.8	4.78559
rs5962788	23	106370642	A	G	0.1713	0	0.992	rs6622208	0.901226	FALSE	NUP62CL (0 kb, intron/NMD transcript/MODIFIER | intron/Intron/MODIFIER); RP13-383K5.4 (4.2 kb, near_gene/Upstream gene/MODIFIER)					NA			ACP vs. all controls	1.65972	1.39-1.99	6.7768	1.81225	1.41-2.33	4.97039	1.71662	1.38-2.13	5.64293
rs4826965	23	106613348	A	G	0.1831	0	0.878	rs4826965	1	TRUE						NA			ACP vs. all controls	1.68558	1.4-2.03	6.77547	1.79239	1.38-2.33	4.49409	1.72161	1.38-2.15	5.3784
rs1954366	23	106462405	C	T	0.1709	0	0.976	rs6622208	0.901909	FALSE	PIH1D3 (0 kb, intron/Intron/MODIFIER)					NA			ACP vs. all controls	1.66487	1.39-1.99	6.77142	1.84851	1.44-2.38	5.19607	1.7059	1.37-2.12	5.42019
rs1285569	23	106420794	G	A	0.173	0	0.996	rs6622208	0.896204	FALSE	NUP62CL (0 kb, intron/NMD transcript/MODIFIER | intron/Intron/MODIFIER)					NA			ACP vs. all controls	1.65174	1.38-1.97	6.76741	1.82655	1.42-2.34	5.14463	1.70094	1.37-2.11	5.52634
rs1285568	23	106421293	C	A	0.173	0	0.996	rs6622208	0.896204	FALSE	NUP62CL (0 kb, intron/NMD transcript/MODIFIER | intron/Intron/MODIFIER)					NA			ACP vs. all controls	1.65174	1.38-1.97	6.76741	1.82655	1.42-2.34	5.14463	1.70094	1.37-2.11	5.52634
rs1285574	23	106415651	C	A	0.173	0	0.996	rs6622208	0.896021	FALSE	NUP62CL (0 kb, intron/NMD transcript/MODIFIER | intron/Intron/MODIFIER)					NA			ACP vs. all controls	1.65148	1.38-1.97	6.7636	1.82628	1.42-2.34	5.14238	1.70094	1.37-2.11	5.52634
rs1285572	23	106416209	C	G	0.173	0	0.996	rs6622208	0.896021	FALSE	NUP62CL (0 kb, intron/NMD transcript/MODIFIER | intron/Intron/MODIFIER)					NA			ACP vs. all controls	1.65148	1.38-1.97	6.7636	1.82628	1.42-2.34	5.14238	1.70094	1.37-2.11	5.52634
rs1285570	23	106416603	G	A	0.173	0	0.996	rs6622208	0.896021	FALSE	NUP62CL (0 kb, intron/NMD transcript/MODIFIER | intron/Intron/MODIFIER)					NA			ACP vs. all controls	1.65148	1.38-1.97	6.7636	1.82628	1.42-2.34	5.14238	1.70094	1.37-2.11	5.52634
rs1285590	23	106396455	A	G	0.1733	0	1	rs6622208	0.893118	FALSE	NUP62CL (0 kb, 3'utr/3 prime UTR/MODIFIER | exon/Synonymous/LOW | intron/NMD transcript/MODIFIER | near_gene/Downstream gene/MODIFIER)					NA			ACP vs. all controls	1.64917	1.38-1.97	6.7564	1.82223	1.42-2.34	5.1374	1.69729	1.37-2.1	5.5225
rs982835	23	106398034	C	G	0.1733	0	1	rs6622208	0.893118	FALSE	NUP62CL (0 kb, intron/NMD transcript/MODIFIER | intron/Intron/MODIFIER | near_gene/Upstream gene/MODIFIER)					NA			ACP vs. all controls	1.64917	1.38-1.97	6.7564	1.82223	1.42-2.34	5.1374	1.69729	1.37-2.1	5.5225
rs1285591	23	106398437	G	C	0.1733	0	1	rs6622208	0.893118	FALSE	NUP62CL (0 kb, intron/NMD transcript/MODIFIER | intron/Intron/MODIFIER | near_gene/Upstream gene/MODIFIER)					NA			ACP vs. all controls	1.64917	1.38-1.97	6.7564	1.82223	1.42-2.34	5.1374	1.69729	1.37-2.1	5.5225
rs1285575	23	106413956	G	A	0.1733	0	0.999	rs6622208	0.89313	FALSE	NUP62CL (0 kb, intron/NMD transcript/MODIFIER | intron/Intron/MODIFIER)					NA			ACP vs. all controls	1.64891	1.38-1.97	6.75259	1.82169	1.42-2.34	5.13289	1.69703	1.37-2.1	5.51963
chrX:106527796:I	23	106527796	A	AG	0.1082	0	0.693	chrX:106527804:I	0.974018	FALSE						NA			ACP vs. all controls	2.1054	1.62-2.74	6.75035	2.42736	1.69-3.48	5.28676	2.14447	1.57-2.94	5.33817
rs17163631	7	142421418	G	A	0.0578	0	0.987	rs2886944	0.890675	FALSE	TRBVB (1.7 kb, near_gene/Downstream gene/MODIFIER); TRBV27 (1.8 kb, near_gene/Upstream gene/MODIFIER); TRBV28 (7.1 kb); PGBD4P1 (8.8 kb); TRBV26 (17 kb); TRBV29-1 (27 kb); TRBVA (32 kb); PRSS1 (36 kb); TRBV25-1 (42 kb); PRSS3P1 (47 kb)	-0.0223294	-0.175862	3.475	0.432165	NA	ENST00000390388 | ENST00000390397 | EPHB6 | TRBV19 | U66060.1-19 | U66060.1-23 | U66061.1-11 | unnamed		ACP vs. all controls	1.7224	1.42-2.09	6.75028	1.7556	1.37-2.25	4.63142	1.7122	1.34-2.19	4.47843
rs1298577	23	106396402	A	G	0.1734	2	1	rs6622208	0.893088	FALSE	NUP62CL (0 kb, exon/Missense/MODERATE | 3'utr/3 prime UTR/MODIFIER | intron/Splice region/LOW | intron/NMD transcript/MODIFIER | near_gene/Downstream gene/MODIFIER)					NA			ACP vs. all controls	1.64866	1.38-1.97	6.74877	1.82196	1.42-2.34	5.13514	1.69677	1.37-2.1	5.51677
rs6523946	23	106588623	G	A	0.1801	0	0.972	rs6622208	0.859148	FALSE						NA			ACP vs. all controls	1.6484	1.38-1.97	6.74496	1.81279	1.41-2.33	5.04453	1.65071	1.33-2.05	4.98319
chrX:106593710:D	23	106593710	ACT	A	0.1773	0	0.986	rs6622208	0.869239	FALSE						NA			ACP vs. all controls	1.6502	1.38-1.97	6.74458	1.80016	1.4-2.31	4.93978	1.66746	1.35-2.07	5.1461
rs138520829	23	105747497	C	T	0.0814	0	0.609	rs138520829	1	TRUE						0.33 Pancreatitis		CDIPT | PDGFD	ACP vs. all controls	2.18895	1.67-2.9	6.73614	2.65082	1.72-4	4.60994	1.93116	1.37-2.7	3.5015
chrX:106423208:I	23	106423208	C	CT	0.1694	0	0.975	rs6622208	0.89099	FALSE	NUP62CL (0 kb, intron/NMD transcript/MODIFIER | intron/Intron/MODIFIER)					NA			ACP vs. all controls	1.6641	1.39-1.99	6.73363	1.83603	1.42-2.37	5.03891	1.70355	1.37-2.12	5.36078
rs1285573	23	106415810	G	A	0.1727	0	0.994	rs6622208	0.89763	FALSE	NUP62CL (0 kb, intron/NMD transcript/MODIFIER | intron/Intron/MODIFIER)					NA			ACP vs. all controls	1.65097	1.38-1.97	6.72902	1.82655	1.42-2.34	5.14463	1.69833	1.37-2.11	5.47992
chrX:106593709:D	23	106593709	TAC	T	0.1756	0	0.976	rs6622208	0.867456	FALSE						NA			ACP vs. all controls	1.65585	1.38-1.98	6.72037	1.8101	1.41-2.33	4.96653	1.67133	1.35-2.08	5.08826
rs6622170	23	106413888	T	C	0.1722	0	0.995	rs6622208	0.900409	FALSE	NUP62CL (0 kb, intron/NMD transcript/MODIFIER | intron/Intron/MODIFIER)					NA			ACP vs. all controls	1.652	1.38-1.97	6.71732	1.8298	1.43-2.35	5.15719	1.69026	1.36-2.1	5.37469
rs5962800	23	106433175	G	A	0.1751	0	0.952	rs6622208	0.890143	FALSE	NUP62CL (0 kb, intron/NMD transcript/MODIFIER | intron/Intron/MODIFIER)					NA			ACP vs. all controls	1.66281	1.39-1.99	6.71505	1.84715	1.43-2.38	5.15652	1.70459	1.37-2.12	5.38901
rs12673576	7	142418025	T	C	0.0575	0	0.979	rs2886944	0.894162	FALSE	TRBVB (1.2 kb, near_gene/Upstream gene/MODIFIER); TRBV27 (5.1 kb); TRBV28 (10 kb); PGBD4P1 (12 kb); TRBV26 (14 kb); TRBVA (28 kb); TRBV29-1 (30 kb); TRBV25-1 (39 kb); PRSS1 (39 kb)	-0.268358	-0.0749731	2.05	0.714092	NA	ENST00000390388 | ENST00000390397 | EPHB6 | TRBV19 | U66060.1-19 | U66060.1-23 | U66061.1-11 | unnamed		ACP vs. all controls	1.7276	1.42-2.1	6.70653	1.7467	1.36-2.24	4.50752	1.71	1.34-2.19	4.4098
rs6622216	23	106593414	T	G	0.1781	0	0.988	rs6622208	0.865867	FALSE	DNAJA1P3 (1.5 kb, near_gene/Downstream gene/MODIFIER)					NA			ACP vs. all controls	1.64327	1.38-1.96	6.69568	1.79399	1.4-2.3	4.91621	1.6641	1.34-2.06	5.14343
rs11092593	23	106596133	G	A	0.1779	0	0.988	rs6622208	0.865616	FALSE	DNAJA1P3 (0.06 kb, near_gene/Upstream gene/MODIFIER)					NA			ACP vs. all controls	1.64301	1.38-1.96	6.69187	1.79399	1.4-2.3	4.91621	1.6641	1.34-2.06	5.14343
chrX:106328494:I	23	106328494	T	TTC	0.17	0	0.997	rs6622208	0.890904	FALSE	RBM41 (0 kb, intron/NMD transcript/MODIFIER | intron/Intron/MODIFIER | near_gene/Downstream gene/MODIFIER)					NA			ACP vs. all controls	1.6538	1.38-1.98	6.69034	1.77982	1.38-2.29	4.68054	1.72844	1.39-2.15	5.75317
rs79549392	7	142383797	C	A	0.06	0	0.911	rs2886944	0.972997	FALSE	TRBV25-1 (4.7 kb, near_gene/Downstream gene/MODIFIER); TRBVA (5.4 kb); TRBV24-1 (19 kb); TRBV26 (20 kb); TRBV23-1 (30 kb); TRBV22-1 (34 kb); TRBVB (35 kb); TRBV21-1 (39 kb); TRBV27 (39 kb); TRBV28 (45 kb); PGBD4P1 (46 kb); TRBV20-1 (49 kb)	-0.176133	-0.180209	8.005	0.575741	NA	ENST00000390388 | ENST00000390397 | EPHB6 | TRBV19 | U66060.1-19 | U66060.1-23 | U66061.1-11 | unnamed		ACP vs. all controls	1.7329	1.42-2.11	6.68898	1.7371	1.35-2.23	4.33909	1.74	1.35-2.23	4.52385
rs6622218	23	106598153	T	A	0.1779	0	0.989	rs6622208	0.865321	FALSE	DNAJA1P3 (2.1 kb, near_gene/Upstream gene/MODIFIER)					NA			ACP vs. all controls	1.64275	1.38-1.96	6.68805	1.79319	1.4-2.3	4.90953	1.66358	1.34-2.06	5.13786
rs933315	23	106598707	A	G	0.1781	0	0.99	rs6622208	0.86466	FALSE	DNAJA1P3 (2.6 kb, near_gene/Upstream gene/MODIFIER)					NA			ACP vs. all controls	1.64275	1.38-1.96	6.68805	1.79453	1.4-2.3	4.93447	1.66358	1.34-2.06	5.13786
rs1578820	23	106355537	A	G	0.1708	0	0.997	rs6622208	0.891103	FALSE	RBM41 (0 kb, intron/NMD transcript/MODIFIER | intron/Intron/MODIFIER | nc-RNA/Non coding transcript/MODIFIER | near_gene/Downstream gene/MODIFIER)					NA			ACP vs. all controls	1.65174	1.38-1.98	6.68687	1.78784	1.39-2.3	4.77137	1.71872	1.39-2.13	5.68429
rs1578819	23	106355646	T	C	0.1708	0	0.997	rs6622208	0.89117	FALSE	RBM41 (0 kb, intron/NMD transcript/MODIFIER | intron/Intron/MODIFIER | nc-RNA/Non coding transcript/MODIFIER | near_gene/Downstream gene/MODIFIER)					NA			ACP vs. all controls	1.65174	1.38-1.98	6.68687	1.7881	1.39-2.3	4.77354	1.71872	1.39-2.13	5.68429
rs762691	7	142506685	C	T	0.4966	0	0.983	rs762691	1	TRUE	TRBV30 (3.6 kb, near_gene/Downstream gene/MODIFIER); TRBC2 (6.3 kb); TRBJ2-7 (11 kb); TRBJ2-6 (12 kb); TRBJ2-5 (12 kb); TRBJ2-4 (12 kb); TRBJ2-3 (12 kb); TRBJ2-2P (12 kb); TRBJ2-2 (12 kb); TRBJ2-1 (13 kb); WBP1LP1 (19 kb); PRSS3P2 (24 kb); PRSS3P1 (35 kb); PRSS1 (46 kb); EPHB6 (46 kb)	0.862319	3.6848	0.738	0.530619	NA	C7orf34 | C7ORF34 | ENST00000390392 | ENST00000390401 | ENST00000390418 | ENST00000390419 | EPHB6 | KEL | PRSS3P1 | PRSS3P2 | TRBV28 | TRBV30 | TRPV6 | U66060.1-19 | U66060.1-23 | U66061.1-11 | unnamed	FGFBP2	ACP vs. all controls	1.24611	1.15-1.4	6.68264	1.19517	1.08-1.3	2.78211	1.32153	1.19-1.5	6.31727
rs1859170	23	106572635	A	G	0.1856	0	0.959	rs6622208	0.871117	FALSE						NA			ACP vs. all controls	1.63789	1.37-1.95	6.66928	1.79346	1.4-2.3	4.91176	1.63712	1.32-2.03	4.88582
chrX:106300593:D	23	106300593	TTG	T	0.1693	0	0.995	rs6622208	0.891343	FALSE						NA			ACP vs. all controls	1.6538	1.38-1.98	6.66388	1.77422	1.38-2.28	4.6228	1.73028	1.39-2.15	5.75452
rs3747402	23	106450683	A	G	0.1739	0	0.979	rs6622208	0.905214	FALSE	PIH1D3 (0 kb, intron/Intron/MODIFIER); NUP62CL (1 kb, near_gene/Upstream gene/MODIFIER); Y_RNA (4.8 kb, near_gene/Downstream gene/MODIFIER)					NA			ACP vs. all controls	1.64814	1.38-1.97	6.66076	1.82034	1.42-2.34	5.02268	1.69416	1.37-2.1	5.39935
rs6622138	23	106294653	T	C	0.1701	0	0.999	rs6622208	0.886041	FALSE						NA			ACP vs. all controls	1.64994	1.38-1.97	6.66057	1.7697	1.38-2.28	4.61182	1.72344	1.39-2.14	5.71734
rs6622140	23	106297135	G	A	0.1701	0	0.999	rs6622208	0.886041	FALSE						NA			ACP vs. all controls	1.64994	1.38-1.97	6.66057	1.7697	1.38-2.28	4.61182	1.72344	1.39-2.14	5.71734
rs5962377	23	106299821	C	T	0.1701	0	0.999	rs6622208	0.886041	FALSE						NA			ACP vs. all controls	1.64994	1.38-1.97	6.66057	1.7697	1.38-2.28	4.61182	1.72344	1.39-2.14	5.71734
rs1999003	23	106309901	C	G	0.1701	0	0.999	rs6622208	0.886041	FALSE	RBM41 (0 kb, 3'utr/3 prime UTR/MODIFIER | nc-exon/Non coding transcript exon/MODIFIER | intron/NMD transcript/MODIFIER | intron/Intron/MODIFIER | nc-RNA/Non coding transcript/MODIFIER | near_gene/Downstream gene/MODIFIER)					NA			ACP vs. all controls	1.64994	1.38-1.97	6.66057	1.7697	1.38-2.28	4.61182	1.72344	1.39-2.14	5.71734
rs6622146	23	106322665	T	C	0.1701	2	1	rs6622208	0.88595	FALSE	RBM41 (0 kb, intron/NMD transcript/MODIFIER | intron/Intron/MODIFIER)					NA			ACP vs. all controls	1.64994	1.38-1.97	6.66057	1.76943	1.38-2.27	4.60968	1.72344	1.39-2.14	5.71734
rs6523917	23	106323891	A	T	0.1701	0	0.999	rs6622208	0.886043	FALSE	RBM41 (0 kb, intron/NMD transcript/MODIFIER | intron/Intron/MODIFIER)					NA			ACP vs. all controls	1.64994	1.38-1.97	6.66057	1.7697	1.38-2.28	4.61182	1.72344	1.39-2.14	5.71734
chrX:106409195:D	23	106409195	GAAGAAA	G	0.1703	0	0.985	rs6622208	0.888935	FALSE						NA			ACP vs. all controls	1.65534	1.38-1.98	6.65992	1.85559	1.44-2.39	5.29757	1.69	1.36-2.1	5.26877
rs6965731	7	142393369	G	A	0.062	0	0.901	rs2886944	0.956427	FALSE	TRBVA (3.7 kb, near_gene/Downstream gene/MODIFIER); TRBV26 (10 kb); TRBV25-1 (14 kb); TRBVB (26 kb); TRBV24-1 (29 kb); TRBV27 (30 kb); TRBV28 (35 kb); PGBD4P1 (37 kb); TRBV23-1 (39 kb); TRBV22-1 (44 kb); TRBV21-1 (48 kb)	-0.329399	-0.213027	0.895	0.238273	NA	ENST00000390388 | ENST00000390397 | EPHB6 | GSTK1 | TRBV19 | U66060.1-19 | U66060.1-23 | U66061.1-11 | unnamed		ACP vs. all controls	1.7192	1.42-2.09	6.65925	1.6979	1.32-2.18	4.097	1.753	1.37-2.25	4.68312
rs926626	23	106676111	G	A	0.1985	0	0.853	rs6622208	0.816368	FALSE	KRT18P49 (3.4 kb, near_gene/Downstream gene/MODIFIER); AL035088.1 (3.8 kb, near_gene/Downstream gene/MODIFIER)					NA			ACP vs. all controls	1.66229	1.39-1.99	6.65518	1.79453	1.39-2.32	4.65733	1.68403	1.35-2.1	5.12321
rs5962839	23	106677155	A	T	0.1985	0	0.852	rs6622208	0.816362	FALSE	KRT18P49 (4.4 kb, near_gene/Downstream gene/MODIFIER); AL035088.1 (4.8 kb, near_gene/Downstream gene/MODIFIER)					NA			ACP vs. all controls	1.66229	1.39-1.99	6.65518	1.79453	1.39-2.32	4.65733	1.68403	1.35-2.1	5.12321
rs6622142	23	106313135	G	C	0.1683	0	0.992	rs6622208	0.894897	FALSE	RBM41 (0 kb, 3'utr/3 prime UTR/MODIFIER | intron/NMD transcript/MODIFIER | intron/Intron/MODIFIER | near_gene/Downstream gene/MODIFIER | near_gene/Upstream gene/MODIFIER)					NA			ACP vs. all controls	1.65663	1.38-1.98	6.65225	1.77209	1.38-2.28	4.58061	1.73923	1.4-2.16	5.81426
rs6622145	23	106322625	T	G	0.1683	0	0.992	rs6622208	0.894897	FALSE	RBM41 (0 kb, intron/NMD transcript/MODIFIER | intron/Intron/MODIFIER)					NA			ACP vs. all controls	1.65663	1.38-1.98	6.65225	1.77209	1.38-2.28	4.58061	1.73923	1.4-2.16	5.81426
rs6616625	23	106325217	C	A	0.1683	0	0.992	rs6622208	0.8949	FALSE	RBM41 (0 kb, intron/NMD transcript/MODIFIER | intron/Intron/MODIFIER)					NA			ACP vs. all controls	1.65663	1.38-1.98	6.65225	1.77209	1.38-2.28	4.58061	1.73923	1.4-2.16	5.81426
rs550003	1	15777562	G	A	0.3404	0	0.932	rs6693417	0.839925	FALSE	CTRC (1.8 kb, near_gene/Downstream gene/MODIFIER); CELA2A (5.7 kb); CELA2B (15 kb); EFHD2 (21 kb); CASP9 (40 kb)	-0.007001	-0.172097	5.234	0.665006	NA	CASP9 | CTRC | DNAJC16 | EFHD2 | PLEKHM2 | SLC25A34 | SPEN | TMEM51		ACP vs. all controls	1.2779	1.17-1.39	6.65025	1.3487	1.2-1.52	5.67233	1.2797	1.14-1.44	4.16554
chrX:106300128:I	23	106300128	G	GA	0.1693	0	0.993	rs6622208	0.884898	FALSE						NA			ACP vs. all controls	1.65277	1.38-1.98	6.64895	1.77129	1.38-2.28	4.59935	1.7266	1.39-2.14	5.71449
rs6622154	23	106353940	A	G	0.1698	0	0.994	rs6622208	0.895301	FALSE	RBM41 (0 kb, intron/NMD transcript/MODIFIER | intron/Intron/MODIFIER | nc-RNA/Non coding transcript/MODIFIER | near_gene/Downstream gene/MODIFIER)					NA			ACP vs. all controls	1.65277	1.38-1.98	6.64895	1.7865	1.39-2.3	4.73435	1.72528	1.39-2.14	5.70022
rs6622213	23	106581209	A	G	0.1857	0	0.964	rs6622208	0.870305	FALSE						NA			ACP vs. all controls	1.63277	1.37-1.95	6.6464	1.78516	1.39-2.29	4.87016	1.63201	1.32-2.02	4.86266
rs6622195	23	106508082	T	C	0.1838	0	0.901	rs6622208	0.893884	FALSE						NA			ACP vs. all controls	1.66694	1.39-2	6.64334	1.81818	1.41-2.35	4.80409	1.69651	1.36-2.12	5.18694
rs4826961	23	106573149	A	T	0.1854	0	0.958	rs6622208	0.872153	FALSE						NA			ACP vs. all controls	1.6361	1.37-1.95	6.64249	1.79185	1.4-2.3	4.89841	1.63431	1.32-2.02	4.83992
rs6695499	1	15755676	G	A	0.2182	0	0.943	rs6695499	1	TRUE	EFHD2 (0 kb, 3'utr/3 prime UTR/MODIFIER | near_gene/Downstream gene/MODIFIER); CTRC (9.3 kb); CELA2A (28 kb); FHAD1 (29 kb); CELA2B (37 kb)	-0.451924	-0.0841375	2.448	0.430996	NA	CASP9 | CTRC | DNAJC16 | EFHD2 | PLEKHM2		ACP vs. all controls	1.3255	1.2-1.47	6.6424	1.3177	1.15-1.51	3.92923	1.3926	1.22-1.59	5.72119
rs6622149	23	106328624	G	A	0.1703	0	0.999	rs6622208	0.888218	FALSE	RBM41 (0 kb, intron/NMD transcript/MODIFIER | intron/Intron/MODIFIER | near_gene/Downstream gene/MODIFIER)					NA			ACP vs. all controls	1.64866	1.38-1.97	6.64181	1.77929	1.38-2.29	4.70207	1.72029	1.39-2.13	5.70152
rs6622143	23	106313508	G	A	0.1693	0	0.996	rs6622208	0.891292	FALSE	RBM41 (0 kb, exon/Missense/MODERATE | intron/NMD transcript/MODIFIER | intron/Intron/MODIFIER | near_gene/Upstream gene/MODIFIER)					NA			ACP vs. all controls	1.65225	1.38-1.98	6.64149	1.77129	1.38-2.28	4.61198	1.72975	1.39-2.15	5.74879
rs4494037	23	106318457	C	T	0.1693	0	0.996	rs6622208	0.891292	FALSE	RBM41 (0 kb, intron/NMD transcript/MODIFIER | intron/Intron/MODIFIER)					NA			ACP vs. all controls	1.65225	1.38-1.98	6.64149	1.77129	1.38-2.28	4.61198	1.72975	1.39-2.15	5.74879
rs929251	23	106575521	T	G	0.1854	0	0.958	rs6622208	0.872027	FALSE						NA			ACP vs. all controls	1.63584	1.37-1.95	6.63867	1.79131	1.4-2.3	4.89397	1.63405	1.32-2.02	4.85294
rs5962770	23	106136910	T	C	0.2995	0	0.911	rs5962770	1	TRUE	MORC4 (0 kb, intron/Intron/MODIFIER)					NA			ACP vs. all controls	1.51487	1.31-1.76	6.63577	1.6874	1.37-2.08	5.57541	1.46507	1.22-1.75	4.22064
chrX:106328495:I	23	106328495	T	TC	0.1702	0	0.998	rs6622208	0.889108	FALSE	RBM41 (0 kb, intron/NMD transcript/MODIFIER | intron/Intron/MODIFIER | near_gene/Downstream gene/MODIFIER)					NA			ACP vs. all controls	1.64814	1.38-1.97	6.63431	1.77422	1.38-2.28	4.64827	1.72134	1.39-2.14	5.69441
rs2014379	23	106331382	C	T	0.1704	0	0.999	rs6622208	0.887909	FALSE	RBM41 (0 kb, intron/NMD transcript/MODIFIER | intron/Intron/MODIFIER | near_gene/Downstream gene/MODIFIER)					NA			ACP vs. all controls	1.64814	1.38-1.97	6.63431	1.77902	1.38-2.29	4.69991	1.71951	1.39-2.13	5.69291
rs6523918	23	106338553	T	C	0.1704	0	0.999	rs6622208	0.887915	FALSE	RBM41 (0 kb, intron/NMD transcript/MODIFIER | intron/Intron/MODIFIER | nc-RNA/Non coding transcript/MODIFIER)					NA			ACP vs. all controls	1.64814	1.38-1.97	6.63431	1.77929	1.38-2.29	4.70207	1.71951	1.39-2.13	5.69291
rs6622152	23	106344058	C	T	0.1704	0	0.999	rs6622208	0.887925	FALSE	RBM41 (0 kb, intron/NMD transcript/MODIFIER | intron/Intron/MODIFIER | nc-RNA/Non coding transcript/MODIFIER)					NA			ACP vs. all controls	1.64814	1.38-1.97	6.63431	1.77929	1.38-2.29	4.70207	1.71951	1.39-2.13	5.69291
rs5962785	23	106344439	G	A	0.1704	0	0.999	rs6622208	0.887925	FALSE	RBM41 (0 kb, intron/NMD transcript/MODIFIER | intron/Intron/MODIFIER | nc-RNA/Non coding transcript/MODIFIER)					NA			ACP vs. all controls	1.64814	1.38-1.97	6.63431	1.77929	1.38-2.29	4.70207	1.71951	1.39-2.13	5.69291
rs6616628	23	106346781	G	C	0.1704	0	0.999	rs6622208	0.887925	FALSE	RBM41 (0 kb, intron/NMD transcript/MODIFIER | intron/Intron/MODIFIER | nc-RNA/Non coding transcript/MODIFIER)					NA			ACP vs. all controls	1.64814	1.38-1.97	6.63431	1.77929	1.38-2.29	4.70207	1.71951	1.39-2.13	5.69291
rs714539	23	106578032	A	G	0.1859	0	0.961	rs6622208	0.871112	FALSE						NA			ACP vs. all controls	1.63354	1.37-1.95	6.63104	1.78917	1.4-2.29	4.88987	1.63252	1.32-2.02	4.8523
rs6622151	23	106343609	C	G	0.1686	0	0.991	rs6622208	0.896788	FALSE	RBM41 (0 kb, intron/NMD transcript/MODIFIER | intron/Intron/MODIFIER | nc-RNA/Non coding transcript/MODIFIER)					NA			ACP vs. all controls	1.65482	1.38-1.98	6.62629	1.78169	1.38-2.29	4.66988	1.73502	1.4-2.16	5.76856
rs12011415	23	106351149	A	G	0.1686	0	0.991	rs6622208	0.896794	FALSE	RBM41 (0 kb, intron/NMD transcript/MODIFIER | intron/Intron/MODIFIER | nc-RNA/Non coding transcript/MODIFIER)					NA			ACP vs. all controls	1.65482	1.38-1.98	6.62629	1.78169	1.38-2.29	4.66988	1.73502	1.4-2.16	5.76856
rs549916	1	15777594	G	A	0.3414	0	0.931	rs6693417	0.839163	FALSE	CTRC (1.9 kb, near_gene/Downstream gene/MODIFIER); CELA2A (5.6 kb); CELA2B (15 kb); EFHD2 (21 kb); CASP9 (40 kb)	-0.95678	-0.313387	0.165	0.393897	NA	CASP9 | CTRC | DNAJC16 | EFHD2 | PLEKHM2 | SLC25A34 | SPEN | TMEM51		ACP vs. all controls	1.277	1.17-1.39	6.61567	1.3481	1.2-1.52	5.64032	1.2778	1.14-1.44	4.12181
chrX:106327148:I	23	106327148	T	TC	0.159	0	0.955	rs6622208	0.877121	FALSE	RBM41 (0 kb, intron/NMD transcript/MODIFIER | intron/Intron/MODIFIER | near_gene/Downstream gene/MODIFIER)					NA			ACP vs. all controls	1.6939	1.4-2.05	6.60924	1.77103	1.36-2.31	4.18883	1.79051	1.43-2.25	5.90648
rs4726565	7	142416048	C	T	0.0575	0	0.977	rs2886944	0.896309	FALSE	TRBVB (3.2 kb, near_gene/Upstream gene/MODIFIER); TRBV27 (7.1 kb); TRBV26 (12 kb); TRBV28 (12 kb); PGBD4P1 (14 kb); TRBVA (26 kb); TRBV29-1 (32 kb); TRBV25-1 (37 kb); PRSS1 (41 kb)	-0.185559	-0.187283	7.576	0.71742	NA	ENST00000390388 | ENST00000390397 | EPHB6 | TRBV19 | U66060.1-19 | U66060.1-23 | U66061.1-11 | unnamed		ACP vs. all controls	1.7179	1.41-2.09	6.60599	1.7443	1.36-2.24	4.48799	1.7067	1.33-2.18	4.3881
rs551713	1	15777412	C	T	0.3413	0	0.932	rs6693417	0.839901	FALSE	CTRC (1.7 kb, near_gene/Downstream gene/MODIFIER); CELA2A (5.8 kb); CELA2B (15 kb); EFHD2 (21 kb); CASP9 (40 kb)	-0.439132	-0.233803	2.893	0.453497	NA	CASP9 | CTRC | DNAJC16 | EFHD2 | PLEKHM2 | SLC25A34 | SPEN | TMEM51		ACP vs. all controls	1.2767	1.17-1.39	6.60416	1.3475	1.2-1.52	5.62527	1.277	1.14-1.44	4.10345
rs7383917	7	142327259	A	C	0.2014	0	0.765	rs7383917	1	TRUE	TRBV19 (0.21 kb, near_gene/Downstream gene/MODIFIER); TRBV20-1 (6.9 kb); TRBV21-1 (17 kb); TRBV22-1 (22 kb); TRBV23-1 (26 kb); TRBV24-1 (37 kb)	-0.847438	-0.296717	0.055	0.0490358	NA	ENST00000390349 | ENST00000390388 | ENST00000390397 | EPHB6 | OR9A2 | PGBD4P1 | PRSS1 | RP5-894A10.2 | TRBV19 | TRBV21-1 | TRBV24-1 | TRBV25-1 | TRBV27 | TRBV28 | TRBV7-3 | TRBV7-8 | TRBV8-2 | U66060.1-19 | U66060.1-21 | U66060.1-23 | U66061.1-11 | unnamed		ACP vs. all controls	1.35062	1.22-1.5	6.60408	1.27747	1.11-1.5	2.77933	1.4997	1.3-1.8	6.49504
rs5962381	23	106347914	A	T	0.1687	0	0.989	rs6622208	0.892103	FALSE	RBM41 (0 kb, intron/NMD transcript/MODIFIER | intron/Intron/MODIFIER | nc-RNA/Non coding transcript/MODIFIER)					NA			ACP vs. all controls	1.65302	1.38-1.98	6.60037	1.78276	1.38-2.3	4.66564	1.72896	1.39-2.15	5.70311
rs6523915	23	106304300	T	G	0.1692	0	0.987	rs6622208	0.894596	FALSE	RBM41 (3.4 kb, near_gene/Downstream gene/MODIFIER)					NA			ACP vs. all controls	1.65277	1.38-1.98	6.59667	1.76917	1.37-2.28	4.55732	1.73633	1.4-2.16	5.76415
rs6418254	23	106665567	G	C	0.1982	0	0.857	rs6622208	0.817482	FALSE						NA			ACP vs. all controls	1.65637	1.38-1.99	6.59648	1.79051	1.39-2.31	4.63842	1.67988	1.35-2.09	5.09634
rs6622228	23	106666291	A	G	0.1978	0	0.855	rs6622208	0.817442	FALSE						NA			ACP vs. all controls	1.65817	1.38-1.99	6.59637	1.79399	1.39-2.32	4.65314	1.68169	1.35-2.09	5.09899
rs6418253	23	106665284	C	T	0.1982	0	0.857	rs6622208	0.817173	FALSE						NA			ACP vs. all controls	1.65611	1.38-1.98	6.5928	1.79024	1.39-2.31	4.63632	1.67936	1.35-2.09	5.09095
rs1298993	23	106286456	G	A	0.241	0	0.825	rs1298993	1	TRUE						NA		ZNF187	ACP vs. all controls	1.59517	1.35-1.89	6.58343	1.7697	1.4-2.23	5.27824	1.566	1.28-1.91	4.58686
rs6523960	23	106660031	G	A	0.1987	0	0.862	rs6622208	0.821561	FALSE						NA			ACP vs. all controls	1.65328	1.38-1.98	6.57814	1.80822	1.4-2.33	4.80369	1.67521	1.35-2.08	5.08017
rs6622226	23	106659613	C	T	0.1987	0	0.862	rs6622208	0.821546	FALSE						NA			ACP vs. all controls	1.65302	1.38-1.98	6.57446	1.80795	1.4-2.33	4.80156	1.67521	1.35-2.08	5.08017
chrX:106292179:D	23	106292179	GT	G	0.1657	0	0.955	rs6622208	0.897253	FALSE						NA			ACP vs. all controls	1.67211	1.39-2.01	6.56256	1.79506	1.39-2.32	4.59925	1.75854	1.41-2.2	5.72401
chrX:106282847:D	23	106282847	AAAG	A	0.1586	0	0.928	rs6622208	0.92137	FALSE						NA			ACP vs. all controls	1.70694	1.41-2.07	6.56088	1.81495	1.39-2.37	4.47387	1.79506	1.42-2.26	5.68525
rs2023846	23	106603137	C	A	0.1798	2	1	rs6622208	0.8554	FALSE						NA			ACP vs. all controls	1.62333	1.36-1.93	6.53113	1.77716	1.39-2.27	4.85786	1.63891	1.33-2.03	4.96963
chrX:106539614:D	23	106539614	CT	C	0.1361	0	0.789	rs6622208	0.850254	FALSE						NA			ACP vs. all controls	1.84878	1.48-2.31	6.52526	2.00024	1.47-2.72	4.54496	1.8953	1.46-2.47	5.30035
rs148126243	23	106668408	G	A	0.1971	0	0.854	rs6622208	0.819737	FALSE	KRT18P49 (3.4 kb, near_gene/Upstream gene/MODIFIER); AL035088.1 (3.8 kb, near_gene/Upstream gene/MODIFIER)					NA			ACP vs. all controls	1.65457	1.38-1.98	6.51956	1.79185	1.39-2.32	4.61144	1.67237	1.34-2.08	4.98673
rs6616619	23	106276933	G	T	0.1671	0	0.957	rs6622208	0.890944	FALSE	EEF1A1P40 (0.88 kb, near_gene/Downstream gene/MODIFIER)					NA			ACP vs. all controls	1.66255	1.38-2	6.50538	1.79131	1.39-2.32	4.60728	1.74134	1.39-2.17	5.59939
rs62471391	7	142389793	T	C	0.0605	0	0.912	rs2886944	0.969075	FALSE	TRBVA (0.1 kb, near_gene/Downstream gene/MODIFIER); TRBV25-1 (11 kb); TRBV26 (14 kb); TRBV24-1 (25 kb); TRBVB (29 kb); TRBV27 (33 kb); TRBV23-1 (36 kb); TRBV28 (39 kb); TRBV22-1 (40 kb); PGBD4P1 (40 kb); TRBV21-1 (45 kb)	-0.294838	-0.203624	0.726	0.734513	NA	ENST00000390388 | ENST00000390397 | EPHB6 | TRBV19 | U66060.1-19 | U66060.1-23 | U66061.1-11 | unnamed		ACP vs. all controls	1.7117	1.41-2.08	6.50248	1.7067	1.33-2.19	4.133	1.7294	1.35-2.22	4.47334
rs56729616	23	106579355	C	A	0.1879	0	0.952	rs6622208	0.867202	FALSE						NA			ACP vs. all controls	1.62461	1.36-1.94	6.49746	1.78036	1.39-2.28	4.80316	1.62894	1.32-2.02	4.81396
rs6616621	23	106279640	G	T	0.1657	0	0.953	rs6622208	0.89633	FALSE	EEF1A1P40 (3.6 kb, near_gene/Downstream gene/MODIFIER)					NA			ACP vs. all controls	1.6672	1.39-2.01	6.49476	1.7881	1.38-2.32	4.53346	1.75006	1.4-2.19	5.61883
rs5962376	23	106292963	C	T	0.17	0	0.971	rs6622208	0.898897	FALSE						NA			ACP vs. all controls	1.64891	1.38-1.98	6.4901	1.76358	1.37-2.27	4.48847	1.72528	1.39-2.15	5.5909
rs7883009	23	106376913	G	A	0.1629	0	0.967	rs6622208	0.869005	FALSE	NUP62CL (0 kb, intron/NMD transcript/MODIFIER | intron/Intron/MODIFIER); RP13-383K5.4 (1.4 kb, near_gene/Downstream gene/MODIFIER)					NA			ACP vs. all controls	1.66668	1.39-2.01	6.48764	1.84009	1.42-2.38	4.92255	1.73502	1.39-2.17	5.49907
rs6622148	23	106327149	T	C	0.1655	0	0.977	rs6622208	0.885521	FALSE	RBM41 (0 kb, intron/NMD transcript/MODIFIER | intron/Intron/MODIFIER | near_gene/Downstream gene/MODIFIER)					NA			ACP vs. all controls	1.65688	1.38-1.99	6.4764	1.77449	1.37-2.29	4.48884	1.7337	1.39-2.16	5.64427
rs7883883	23	106377022	T	G	0.1747	0	0.991	rs6622208	0.89024	FALSE	NUP62CL (0 kb, intron/NMD transcript/MODIFIER | intron/Intron/MODIFIER); RP13-383K5.4 (1.5 kb, near_gene/Downstream gene/MODIFIER)					NA			ACP vs. all controls	1.62843	1.36-1.94	6.47588	1.81953	1.42-2.33	5.10055	1.66978	1.35-2.07	5.22184
chrX:106392771:D	23	106392771	CA	C	0.1743	0	0.989	rs6622208	0.888204	FALSE						NA			ACP vs. all controls	1.62741	1.36-1.94	6.435	1.81037	1.41-2.32	5.0104	1.67081	1.35-2.07	5.21602
rs1285566	23	106378278	G	A	0.1747	0	0.991	rs6622208	0.890114	FALSE	NUP62CL (0 kb, intron/NMD transcript/MODIFIER | intron/Intron/MODIFIER); RP13-383K5.4 (2.8 kb, near_gene/Downstream gene/MODIFIER)					NA			ACP vs. all controls	1.62563	1.36-1.94	6.43451	1.81603	1.42-2.33	5.08561	1.66746	1.35-2.06	5.1966
rs5917035	23	106348399	G	C	0.2432	0	0.82	rs1298993	0.996284	FALSE	RBM41 (0 kb, intron/NMD transcript/MODIFIER | intron/Intron/MODIFIER | nc-RNA/Non coding transcript/MODIFIER)					NA		ZNF187	ACP vs. all controls	1.58407	1.34-1.87	6.43361	1.7697	1.4-2.23	5.27824	1.54207	1.26-1.89	4.29899
rs2003052	23	106377553	T	C	0.1748	0	0.991	rs6622208	0.889815	FALSE	NUP62CL (0 kb, intron/NMD transcript/MODIFIER | intron/Intron/MODIFIER); RP13-383K5.4 (2.1 kb, near_gene/Downstream gene/MODIFIER)					NA			ACP vs. all controls	1.62486	1.36-1.94	6.42325	1.81549	1.42-2.33	5.08112	1.66642	1.35-2.06	5.1854
rs1285567	23	106378252	T	C	0.1748	0	0.991	rs6622208	0.889814	FALSE	NUP62CL (0 kb, intron/NMD transcript/MODIFIER | intron/Intron/MODIFIER); RP13-383K5.4 (2.8 kb, near_gene/Downstream gene/MODIFIER)					NA			ACP vs. all controls	1.62486	1.36-1.94	6.42325	1.81549	1.42-2.33	5.08112	1.66642	1.35-2.06	5.1854
rs1285565	23	106379628	G	A	0.1748	0	0.991	rs6622208	0.889814	FALSE	NUP62CL (0 kb, intron/NMD transcript/MODIFIER | intron/Intron/MODIFIER); RP13-383K5.4 (4.1 kb, near_gene/Downstream gene/MODIFIER)					NA			ACP vs. all controls	1.62486	1.36-1.94	6.42325	1.81549	1.42-2.33	5.08112	1.66642	1.35-2.06	5.1854
rs1285586	23	106386724	T	C	0.1748	0	0.991	rs6622208	0.889984	FALSE	NUP62CL (0 kb, intron/NMD transcript/MODIFIER | intron/Intron/MODIFIER)					NA			ACP vs. all controls	1.62486	1.36-1.94	6.42325	1.81576	1.42-2.33	5.08336	1.66668	1.35-2.06	5.1882
rs1285588	23	106390199	A	G	0.1748	0	0.991	rs6622208	0.889814	FALSE	NUP62CL (0 kb, intron/NMD transcript/MODIFIER | intron/Intron/MODIFIER)					NA			ACP vs. all controls	1.62486	1.36-1.94	6.42325	1.81549	1.42-2.33	5.08112	1.66642	1.35-2.06	5.1854
rs1285546	23	106373432	C	G	0.1748	0	0.992	rs6622208	0.889635	FALSE	NUP62CL (0 kb, intron/NMD transcript/MODIFIER | intron/Intron/MODIFIER); RP13-383K5.4 (1.5 kb, near_gene/Upstream gene/MODIFIER)					NA			ACP vs. all controls	1.62461	1.36-1.94	6.41949	1.81549	1.42-2.33	5.08112	1.66591	1.35-2.06	5.1798
chrX:106352117:D	23	106352117	AC	A	0.2432	0	0.82	rs1298993	0.996286	FALSE	RBM41 (0 kb, intron/NMD transcript/MODIFIER | intron/Intron/MODIFIER | nc-RNA/Non coding transcript/MODIFIER)					NA		ZNF187	ACP vs. all controls	1.58407	1.34-1.87	6.40646	1.7697	1.4-2.23	5.27824	1.54207	1.26-1.89	4.29899
rs3088037	7	142419321	C	G	0.2445	0	0.807	rs62470644	0.842518	FALSE	TRBVB (0 kb, intron/Intron/MODIFIER | nc-RNA/Non coding transcript/MODIFIER); TRBV27 (3.9 kb, near_gene/Upstream gene/MODIFIER); TRBV28 (9.2 kb); PGBD4P1 (11 kb); TRBV26 (15 kb); TRBV29-1 (29 kb); TRBVA (30 kb); PRSS1 (38 kb); TRBV25-1 (40 kb); PRSS3P1 (49 kb)	-0.0506125	0.272195	1.175	0.665402	NA	ENST00000390388 | ENST00000390397 | EPHB6 | OR9A2 | PGBD4P1 | PRSS1 | RP5-894A10.2 | TRBV19 | TRBV21-1 | TRBV24-1 | TRBV25-1 | TRBV27 | TRBV28 | TRBV7-8 | U66060.1-19 | U66060.1-21 | U66060.1-23 | U66061.1-11 | unnamed		ACP vs. all controls	1.31062	1.19-1.4	6.39176	1.27162	1.11-1.4	3.09105	1.42552	1.25-1.6	6.10151
rs1285740	23	106264159	A	C	0.2509	0	0.871	rs1298993	0.905149	FALSE						NA			ACP vs. all controls	1.55433	1.32-1.8	6.38851	1.65424	1.32-2.1	4.50238	1.54776	1.28-1.9	4.6957
rs3114479	7	142502287	C	T	0.4185	0	0.968	rs3114479	1	TRUE	TRBC2 (1.9 kb, near_gene/Downstream gene/MODIFIER); TRBJ2-7 (7.1 kb); TRBJ2-6 (7.3 kb); TRBJ2-5 (7.4 kb); TRBJ2-4 (7.6 kb); TRBJ2-3 (7.7 kb); TRBJ2-2P (7.9 kb); TRBV30 (8 kb); TRBJ2-2 (8 kb); TRBJ2-1 (8.2 kb); WBP1LP1 (15 kb); PRSS3P2 (20 kb); PRSS3P1 (30 kb); PRSS1 (41 kb)	-0.266347	0.0374186	0.584	0.472367	NA	C7orf34 | C7ORF34 | ENST00000390392 | ENST00000390401 | ENST00000390418 | ENST00000390419 | EPHB6 | KEL | PRSS3P1 | TRBV30 | TRPV6 | U66060.1-19 | U66060.1-23 | U66061.1-11 | unnamed		ACP vs. all controls	1.24193	1.15-1.4	6.38311	1.25691	1.12-1.4	4.11543	1.29249	1.16-1.4	5.21296
rs1285584	23	106360441	C	A	0.1742	0	0.989	rs6622208	0.889496	FALSE	RBM41 (0 kb, intron/NMD transcript/MODIFIER | intron/Intron/MODIFIER | near_gene/Upstream gene/MODIFIER)					NA			ACP vs. all controls	1.62359	1.36-1.94	6.3789	1.80392	1.41-2.32	4.94326	1.67004	1.35-2.07	5.20762
chrX:106362078:D	23	106362078	CT	C	0.1742	0	0.989	rs6622208	0.889494	FALSE						NA			ACP vs. all controls	1.62359	1.36-1.94	6.3789	1.80392	1.41-2.32	4.94326	1.67004	1.35-2.07	5.20762
rs1682037	23	106368603	G	A	0.1742	0	0.989	rs6622208	0.889473	FALSE	NUP62CL (0 kb, intron/NMD transcript/MODIFIER | intron/Intron/MODIFIER)					NA			ACP vs. all controls	1.62359	1.36-1.94	6.3789	1.80419	1.41-2.32	4.94548	1.66978	1.35-2.07	5.20483
rs1682036	23	106369324	T	A	0.1742	0	0.989	rs6622208	0.889472	FALSE	NUP62CL (0 kb, intron/NMD transcript/MODIFIER | intron/Intron/MODIFIER)					NA			ACP vs. all controls	1.62359	1.36-1.94	6.3789	1.80419	1.41-2.32	4.94548	1.66978	1.35-2.07	5.20483
rs5962829	23	106620310	A	C	0.1806	0	0.969	rs6622208	0.848939	FALSE						NA			ACP vs. all controls	1.62333	1.36-1.94	6.37517	1.7697	1.38-2.27	4.68896	1.64789	1.33-2.04	4.93702
rs5917034	23	106348389	T	C	0.2401	0	0.811	rs1298993	0.995982	FALSE	RBM41 (0 kb, intron/NMD transcript/MODIFIER | intron/Intron/MODIFIER | nc-RNA/Non coding transcript/MODIFIER)					NA		ZNF187	ACP vs. all controls	1.58836	1.34-1.88	6.36663	1.77769	1.41-2.25	5.25769	1.55052	1.27-1.9	4.33527
rs5962823	23	106591838	T	C	0.181	0	0.99	rs6622208	0.853179	FALSE	DNAJA1P3 (3 kb, near_gene/Downstream gene/MODIFIER)					NA			ACP vs. all controls	1.61061	1.35-1.92	6.36645	1.75881	1.38-2.25	4.6907	1.62767	1.32-2.01	4.84757
rs34308378	7	142386450	G	A	0.0607	0	0.909	rs2886944	0.963477	FALSE	TRBVA (2.8 kb, near_gene/Upstream gene/MODIFIER); TRBV25-1 (7.4 kb); TRBV26 (17 kb); TRBV24-1 (22 kb); TRBV23-1 (32 kb); TRBVB (33 kb); TRBV27 (37 kb); TRBV22-1 (37 kb); TRBV21-1 (42 kb); TRBV28 (42 kb); PGBD4P1 (44 kb)	-0.302915	-0.137891	4.104	0.444317	NA	ENST00000390388 | ENST00000390397 | EPHB6 | TRBV19 | U66060.1-19 | U66060.1-23 | U66061.1-11 | unnamed		ACP vs. all controls	1.6976	1.4-2.06	6.35739	1.6965	1.32-2.18	4.06912	1.7228	1.34-2.21	4.43085
rs3114478	7	142502487	A	G	0.4185	0	0.971	rs3114479	0.999984	FALSE	TRBC2 (2.1 kb, near_gene/Downstream gene/MODIFIER); TRBJ2-7 (7.3 kb); TRBJ2-6 (7.5 kb); TRBJ2-5 (7.6 kb); TRBJ2-4 (7.8 kb); TRBV30 (7.8 kb); TRBJ2-3 (7.9 kb); TRBJ2-2P (8.1 kb); TRBJ2-2 (8.2 kb); TRBJ2-1 (8.4 kb); WBP1LP1 (15 kb); PRSS3P2 (20 kb); PRSS3P1 (31 kb); PRSS1 (42 kb)	-0.0578571	0.504063	0.778	0.627882	NA	C7orf34 | C7ORF34 | ENST00000390392 | ENST00000390401 | ENST00000390418 | ENST00000390419 | EPHB6 | KEL | PRSS3P1 | TRBV30 | TRPV6 | U66060.1-19 | U66060.1-23 | U66061.1-11 | unnamed	FGFBP2	ACP vs. all controls	1.24131	1.15-1.4	6.35669	1.25581	1.12-1.4	4.1009	1.29182	1.16-1.4	5.21126
rs1564802	23	106285360	A	G	0.1733	0	0.951	rs6622208	0.874995	FALSE						NA			ACP vs. all controls	1.64122	1.37-1.97	6.35586	1.7673	1.37-2.28	4.50558	1.69625	1.36-2.11	5.28395
rs6953062	7	142393796	A	T	0.0608	0	0.911	rs2886944	0.965118	FALSE	TRBVA (4.1 kb, near_gene/Downstream gene/MODIFIER); TRBV26 (9.7 kb); TRBV25-1 (15 kb); TRBVB (25 kb); TRBV24-1 (29 kb); TRBV27 (29 kb); TRBV28 (35 kb); PGBD4P1 (36 kb); TRBV23-1 (40 kb); TRBV22-1 (44 kb); TRBV21-1 (49 kb)	-0.286485	-0.206491	0.242	0.485993	NA	ENST00000390388 | ENST00000390397 | EPHB6 | TRBV19 | U66060.1-19 | U66060.1-23 | U66061.1-11 | unnamed		ACP vs. all controls	1.6956	1.4-2.06	6.35503	1.7017	1.33-2.19	4.10469	1.7281	1.35-2.22	4.46873
chrX:106423209:I	23	106423209	T	TG	0.1747	0	0.987	rs6622208	0.892617	FALSE	NUP62CL (0 kb, intron/NMD transcript/MODIFIER | intron/Intron/MODIFIER)					NA			ACP vs. all controls	1.62155	1.36-1.94	6.34906	1.79506	1.4-2.3	4.88403	1.66952	1.35-2.07	5.18512
rs1290413	23	106297803	G	A	0.2417	0	0.817	rs1298993	0.997534	FALSE						NA		ZNF187	ACP vs. all controls	1.58156	1.34-1.87	6.33972	1.76863	1.4-2.23	5.23688	1.54306	1.26-1.89	4.29554
rs707	7	142500467	T	C	0.4221	0	0.954	rs3114479	0.993138	FALSE	TRBC2 (0.035 kb, near_gene/Downstream gene/MODIFIER); TRBJ2-7 (5.3 kb); TRBJ2-6 (5.5 kb); TRBJ2-5 (5.6 kb); TRBJ2-4 (5.7 kb); TRBJ2-3 (5.9 kb); TRBJ2-2P (6 kb); TRBJ2-2 (6.2 kb); TRBJ2-1 (6.4 kb); TRBV30 (9.8 kb); WBP1LP1 (13 kb); PRSS3P2 (18 kb); PRSS3P1 (29 kb); PRSS1 (40 kb)	-0.157553	-0.184325	1.931	0.397585	NA	C7orf34 | C7ORF34 | ENST00000390392 | ENST00000390401 | ENST00000390418 | ENST00000390419 | EPHB6 | KEL | PRSS3P1 | TRBV30 | TRPV6 | U66060.1-19 | U66060.1-23 | U66061.1-11 | unnamed		ACP vs. all controls	1.2427	1.15-1.4	6.33101	1.25439	1.12-1.4	4.00155	1.29299	1.16-1.4	5.17626
rs11327	7	142500409	G	T	0.4221	0	0.954	rs3114479	0.993123	FALSE	TRBC2 (0 kb, 3'utr/3 prime UTR/MODIFIER); TRBJ2-7 (5.2 kb); TRBJ2-6 (5.4 kb); TRBJ2-5 (5.6 kb); TRBJ2-4 (5.7 kb); TRBJ2-3 (5.8 kb); TRBJ2-2P (6 kb); TRBJ2-2 (6.1 kb); TRBJ2-1 (6.3 kb); TRBV30 (9.9 kb); WBP1LP1 (13 kb); PRSS3P2 (18 kb); PRSS3P1 (29 kb); PRSS1 (39 kb)	0.158727	-0.134208	6.928	0.73038	NA	C7orf34 | C7ORF34 | ENST00000390392 | ENST00000390401 | ENST00000390418 | ENST00000390419 | EPHB6 | KEL | PRSS3P1 | TRBV30 | TRPV6 | U66060.1-19 | U66060.1-23 | U66061.1-11 | unnamed		ACP vs. all controls	1.24285	1.15-1.4	6.30953	1.25455	1.12-1.4	4.00541	1.29316	1.16-1.4	5.1809
rs7060186	23	106626082	C	T	0.1811	0	0.974	rs6622208	0.856003	FALSE						NA			ACP vs. all controls	1.61468	1.35-1.93	6.29896	1.76279	1.38-2.26	4.65825	1.63507	1.32-2.03	4.8324
rs3134904	7	142503276	T	G	0.4185	0	0.982	rs3114479	0.999608	FALSE	TRBC2 (2.8 kb, near_gene/Downstream gene/MODIFIER); TRBV30 (7 kb); TRBJ2-7 (8.1 kb); TRBJ2-6 (8.3 kb); TRBJ2-5 (8.4 kb); TRBJ2-4 (8.5 kb); TRBJ2-3 (8.7 kb); TRBJ2-2P (8.8 kb); TRBJ2-2 (9 kb); TRBJ2-1 (9.2 kb); WBP1LP1 (16 kb); PRSS3P2 (21 kb); PRSS3P1 (31 kb); PRSS1 (42 kb); EPHB6 (50 kb)	-0.12693	-0.1612	1.488	0.702422	NA	C7orf34 | C7ORF34 | ENST00000390392 | ENST00000390401 | ENST00000390418 | ENST00000390419 | EPHB6 | KEL | PRSS3P1 | TRBV30 | TRPV6 | U66060.1-19 | U66060.1-23 | U66061.1-11 | unnamed		ACP vs. all controls	1.23793	1.15-1.3	6.29678	1.25125	1.12-1.4	4.02589	1.28899	1.16-1.4	5.18273
rs1859172	23	106594172	G	A	0.18	0	0.985	rs6622208	0.850244	FALSE	DNAJA1P3 (0.71 kb, near_gene/Downstream gene/MODIFIER)					NA			ACP vs. all controls	1.60935	1.35-1.92	6.29624	1.75748	1.37-2.25	4.64047	1.62129	1.31-2.01	4.74761
rs2007376	23	106625477	G	A	0.1811	0	0.974	rs6622208	0.855936	FALSE						NA			ACP vs. all controls	1.61442	1.35-1.93	6.29522	1.76279	1.38-2.26	4.65825	1.63456	1.32-2.02	4.82696
rs1799886	7	142498523	C	T	0.4587	0	0.817	rs1799886	1	TRUE	TRBC2 (0.2 kb, near_gene/Upstream gene/MODIFIER); TRBJ2-7 (3.3 kb, near_gene/Downstream gene/MODIFIER); TRBJ2-6 (3.5 kb, near_gene/Downstream gene/MODIFIER); TRBJ2-5 (3.7 kb, near_gene/Downstream gene/MODIFIER); TRBJ2-4 (3.8 kb, near_gene/Downstream gene/MODIFIER); TRBJ2-3 (3.9 kb, near_gene/Downstream gene/MODIFIER); TRBJ2-2P (4.1 kb, near_gene/Downstream gene/MODIFIER); TRBJ2-2 (4.2 kb, near_ge…	0.100175	-0.127243	4.73	0.474066	NA	C7orf34 | C7ORF34 | ENST00000390392 | ENST00000390397 | ENST00000390401 | ENST00000390418 | ENST00000390419 | EPHB6 | KEL | PRSS3P1 | PRSS3P2 | TRBV19 | TRBV28 | TRBV30 | TRPV6 | U66060.1-19 | U66060.1-23 | U66061.1-11 | unnamed		ACP vs. alcoholic controls	1.2639	1.16-1.4	6.27128	1.19161	1.06-1.3	2.28133	1.37099	1.22-1.5	6.47648
rs4826946	23	106277883	C	G	0.1679	0	0.961	rs6622208	0.885931	FALSE	EEF1A1P40 (1.8 kb, near_gene/Downstream gene/MODIFIER)					NA			ACP vs. all controls	1.63968	1.37-1.97	6.26073	1.77183	1.37-2.29	4.50446	1.71165	1.37-2.13	5.36026
rs6622134	23	106278032	C	T	0.1679	0	0.961	rs6622208	0.885931	FALSE	EEF1A1P40 (2 kb, near_gene/Downstream gene/MODIFIER)					NA			ACP vs. all controls	1.63968	1.37-1.97	6.26073	1.77183	1.37-2.29	4.50446	1.71165	1.37-2.13	5.36026
rs6622135	23	106280225	C	T	0.1679	0	0.961	rs6622208	0.885933	FALSE	EEF1A1P40 (4.2 kb, near_gene/Downstream gene/MODIFIER)					NA			ACP vs. all controls	1.63968	1.37-1.97	6.26073	1.77183	1.37-2.29	4.50446	1.71165	1.37-2.13	5.36026
rs1285559	23	106333572	G	C	0.1703	0	0.984	rs6622208	0.870847	FALSE	RBM41 (0 kb, intron/NMD transcript/MODIFIER | intron/Intron/MODIFIER | nc-RNA/Non coding transcript/MODIFIER)					NA			ACP vs. all controls	1.62486	1.36-1.94	6.24701	1.79587	1.4-2.31	4.79682	1.68428	1.36-2.09	5.24193
rs73247922	23	105408309	G	T	0.0801	0	0.602	rs138520829	0.87155	FALSE	MUM1L1 (4 kb, near_gene/Upstream gene/MODIFIER)					0.319 Pancreatitis		CDIPT | PDGFD	ACP vs. all controls	2.14682	1.61-2.9	6.24432	2.98809	1.92-4.8	5.29568	1.73313	1.22-2.4	2.56873
rs6523954	23	106638799	T	G	0.1821	0	0.975	rs6622208	0.852104	FALSE						NA			ACP vs. all controls	1.60732	1.35-1.92	6.24092	1.75616	1.37-2.25	4.62953	1.63124	1.32-2.02	4.83859
rs5962396	23	106628469	C	T	0.1821	0	0.977	rs6622208	0.851959	FALSE						NA			ACP vs. all controls	1.60554	1.35-1.91	6.23984	1.75483	1.37-2.25	4.61859	1.62894	1.32-2.02	4.81396
rs6523953	23	106629893	G	A	0.1821	0	0.977	rs6622208	0.851963	FALSE						NA			ACP vs. all controls	1.60554	1.35-1.91	6.23984	1.75483	1.37-2.25	4.61859	1.62894	1.32-2.02	4.81396
rs4826944	23	106271226	T	C	0.1686	0	0.957	rs6622208	0.885271	FALSE	EEF1A1P40 (4.3 kb, near_gene/Upstream gene/MODIFIER)					NA			ACP vs. all controls	1.63814	1.36-1.97	6.23933	1.76279	1.37-2.28	4.42195	1.70746	1.37-2.13	5.30001
rs7886175	23	106272126	G	A	0.1686	0	0.957	rs6622208	0.885272	FALSE	EEF1A1P40 (3.4 kb, near_gene/Upstream gene/MODIFIER)					NA			ACP vs. all controls	1.63814	1.36-1.97	6.23933	1.76279	1.37-2.28	4.42195	1.70746	1.37-2.13	5.30001
rs5962394	23	106616403	C	G	0.1821	0	0.977	rs6622208	0.851913	FALSE						NA			ACP vs. all controls	1.60529	1.35-1.91	6.23609	1.7543	1.37-2.25	4.61422	1.62945	1.32-2.02	4.81943
rs5962395	23	106625135	G	T	0.1821	0	0.977	rs6622208	0.851944	FALSE						NA			ACP vs. all controls	1.60529	1.35-1.91	6.23609	1.7543	1.37-2.25	4.61422	1.62894	1.32-2.02	4.81396
rs6702946	1	15782344	G	A	0.2082	0	0.87	rs6702946	1	TRUE	CELA2A (0.88 kb, near_gene/Upstream gene/MODIFIER); CTRC (6.6 kb); CELA2B (10 kb); EFHD2 (26 kb); CASP9 (35 kb)	-0.528951	1.05102	1.061	0.396314	NA	CASP9 | CTRC | DNAJC16 | EFHD2 | PLEKHM2 | SLC25A34 | SPEN		ACP vs. all controls	1.3387	1.2-1.49	6.23559	1.3027	1.13-1.5	3.25476	1.3697	1.19-1.58	4.53817
rs12559122	23	106618219	A	G	0.1823	0	0.978	rs6622208	0.851362	FALSE						NA			ACP vs. all controls	1.60504	1.35-1.91	6.23234	1.75562	1.37-2.25	4.63811	1.62869	1.32-2.01	4.82694
rs1152326	23	106301106	A	C	0.1722	0	0.99	rs6622208	0.881297	FALSE						NA			ACP vs. all controls	1.6162	1.35-1.93	6.22122	1.76465	1.37-2.27	4.58379	1.68221	1.36-2.09	5.30502
rs1152327	23	106301712	T	G	0.1722	0	0.99	rs6622208	0.881297	FALSE						NA			ACP vs. all controls	1.6162	1.35-1.93	6.22122	1.76465	1.37-2.27	4.58379	1.68221	1.36-2.09	5.30502
rs1152328	23	106303383	C	T	0.1722	0	0.99	rs6622208	0.881297	FALSE	RBM41 (4.3 kb, near_gene/Downstream gene/MODIFIER)					NA			ACP vs. all controls	1.6162	1.35-1.93	6.22122	1.76465	1.37-2.27	4.58379	1.68221	1.36-2.09	5.30502
rs1152329	23	106303750	G	A	0.1722	0	0.99	rs6622208	0.881297	FALSE	RBM41 (3.9 kb, near_gene/Downstream gene/MODIFIER)					NA			ACP vs. all controls	1.6162	1.35-1.93	6.22122	1.76465	1.37-2.27	4.58379	1.68221	1.36-2.09	5.30502
rs1152330	23	106304016	G	A	0.1722	0	0.99	rs6622208	0.881297	FALSE	RBM41 (3.6 kb, near_gene/Downstream gene/MODIFIER)					NA			ACP vs. all controls	1.6162	1.35-1.93	6.22122	1.76465	1.37-2.27	4.58379	1.68221	1.36-2.09	5.30502
rs1152333	23	106311570	A	T	0.1722	0	0.99	rs6622208	0.881297	FALSE	RBM41 (0 kb, intron/NMD transcript/MODIFIER | intron/Intron/MODIFIER | nc-RNA/Non coding transcript/MODIFIER | near_gene/Downstream gene/MODIFIER)					NA			ACP vs. all controls	1.6162	1.35-1.93	6.22122	1.76465	1.37-2.27	4.58379	1.68221	1.36-2.09	5.30502
rs980099	23	106311987	T	C	0.1722	0	0.99	rs6622208	0.881297	FALSE	RBM41 (0 kb, intron/NMD transcript/MODIFIER | intron/Intron/MODIFIER | nc-RNA/Non coding transcript/MODIFIER | near_gene/Downstream gene/MODIFIER)					NA			ACP vs. all controls	1.6162	1.35-1.93	6.22122	1.76465	1.37-2.27	4.58379	1.68221	1.36-2.09	5.30502
rs6622147	23	106327120	C	T	0.1722	0	0.99	rs6622208	0.881301	FALSE	RBM41 (0 kb, intron/NMD transcript/MODIFIER | intron/Intron/MODIFIER | near_gene/Downstream gene/MODIFIER)					NA			ACP vs. all controls	1.6162	1.35-1.93	6.22122	1.76465	1.37-2.27	4.58379	1.68221	1.36-2.09	5.30502
rs2152240	10	120822033	G	T	0.3844	0	0.972	rs10787903	0.896189	FALSE	EIF3A (0 kb, intron/Intron/MODIFIER | near_gene/Upstream gene/MODIFIER); SNORA19 (1.4 kb, near_gene/Upstream gene/MODIFIER); SNORA19 (2.4 kb, near_gene/Upstream gene/MODIFIER); NANOS1 (28 kb); FAM45A (42 kb)			2.371	0.640298	NA	BAG3 | C10orf84 | EIF3A | FAM45A | FAM45B | GRK5 | INPP5F | NANOS1 | PRDX3 | RP11-435O11.2 | RP11-498J9.2 | SFXN4 | SNORA19 | unnamed	ZMIZ1	ACP vs. all controls	1.24533	1.15-1.4	6.22023	1.27324	1.14-1.4	4.33468	1.26614	1.14-1.4	4.3407
rs62470035	7	142360441	A	G	0.0846	0	0.912	rs62470035	1	TRUE	TRBV24-1 (3.8 kb, near_gene/Upstream gene/MODIFIER); TRBV23-1 (6.5 kb); TRBV22-1 (11 kb); TRBV21-1 (16 kb); TRBV25-1 (18 kb); TRBV20-1 (26 kb); TRBVA (29 kb); TRBV19 (33 kb); TRBV26 (43 kb)	-0.484555	-0.244594	3.863	0.534084	NA	ENST00000390388 | ENST00000390397 | EPHB6 | TRBV19 | U66060.1-19 | U66060.1-23 | U66061.1-11 | unnamed		ACP vs. all controls	1.5474	1.32-1.82	6.2174	1.5606	1.27-1.92	4.12656	1.5041	1.22-1.85	3.69434
rs5917040	23	106514181	T	G	0.2492	0	0.768	rs1298993	0.952624	FALSE	MYCL2 (1.6 kb, near_gene/Upstream gene/MODIFIER)					NA		ZNF187	ACP vs. all controls	1.587	1.33-1.9	6.215	1.77399	1.39-2.3	5.08733	1.55821	1.27-1.9	4.31852
rs1152335	23	106319219	C	T	0.1721	0	0.989	rs6622208	0.881188	FALSE	RBM41 (0 kb, intron/NMD transcript/MODIFIER | intron/Intron/MODIFIER)					NA			ACP vs. all controls	1.61519	1.35-1.93	6.20651	1.76412	1.37-2.27	4.57951	1.68169	1.36-2.08	5.29942
rs3765369	1	15752716	C	T	0.207	2	1	rs6695499	0.899941	FALSE	EFHD2 (0 kb, intron/Intron/MODIFIER); CTRC (12 kb); FHAD1 (26 kb); CELA2A (31 kb); CELA2B (40 kb)	-0.147888	0.15983	5.086	0.564365	NA	CASP9 | CTRC | EFHD2 | PLEKHM2		ACP vs. all controls	1.3067	1.18-1.44	6.1979	1.3018	1.14-1.48	3.7098	1.3907	1.22-1.58	5.8345
rs1285563	23	106330707	T	C	0.1725	0	0.989	rs6622208	0.883152	FALSE	RBM41 (0 kb, intron/NMD transcript/MODIFIER | intron/Intron/MODIFIER | near_gene/Downstream gene/MODIFIER)					NA			ACP vs. all controls	1.61442	1.35-1.93	6.1955	1.77422	1.38-2.28	4.67397	1.67858	1.35-2.08	5.28299
rs1285561	23	106333025	C	T	0.1725	0	0.989	rs6622208	0.88315	FALSE	RBM41 (0 kb, intron/NMD transcript/MODIFIER | intron/Intron/MODIFIER | nc-RNA/Non coding transcript/MODIFIER)					NA			ACP vs. all controls	1.61442	1.35-1.93	6.1955	1.77422	1.38-2.28	4.67397	1.67858	1.35-2.08	5.28299
rs1285554	23	106290205	G	A	0.1736	0	0.968	rs6622208	0.887707	FALSE						NA			ACP vs. all controls	1.61926	1.35-1.94	6.1914	1.75298	1.36-2.25	4.46538	1.67521	1.35-2.08	5.12917
rs1285544	23	106317472	T	C	0.1718	0	0.987	rs6622208	0.880617	FALSE	RBM41 (0 kb, intron/NMD transcript/MODIFIER | intron/Intron/MODIFIER | near_gene/Upstream gene/MODIFIER)					NA			ACP vs. all controls	1.61519	1.35-1.93	6.18194	1.76598	1.37-2.27	4.58188	1.67884	1.35-2.08	5.25153
rs4826948	23	106289750	G	T	0.1708	0	0.965	rs6622208	0.877418	FALSE						NA			ACP vs. all controls	1.62537	1.36-1.95	6.18107	1.74742	1.36-2.25	4.3613	1.68896	1.36-2.1	5.20753
rs148933117	1	16118068	C	A	0.0536	0	0.863	rs148933117	1	TRUE	RP11-169K16.6 (1.2 kb, near_gene/Upstream gene/MODIFIER); FBLIM1 (5 kb, near_gene/Downstream gene/MODIFIER); TMEM82 (44 kb); SLC25A34 (50 kb)	-0.573577	-0.249336	0.046	0.0838891	NA	AGMAT | CASP9 | CROCCP3 | DNAJC16 | PLEKHM2 | RP11-288I21.1 | RSC1A1 | SLC25A34	CD97	ACP vs. all controls	1.58453	1.33-1.9	6.17728	1.45943	1.15-1.9	2.52043	1.61996	1.28-2	3.91515
rs6418251	23	106634163	C	A	0.1835	0	0.981	rs6622208	0.845354	FALSE						NA			ACP vs. all controls	1.59618	1.34-1.9	6.17606	1.74848	1.37-2.24	4.61769	1.61544	1.31-1.99	4.74674
rs1285742	23	106266420	C	A	0.1729	0	0.97	rs6622208	0.887178	FALSE						NA			ACP vs. all controls	1.61951	1.35-1.94	6.17068	1.76119	1.37-2.27	4.51864	1.67444	1.35-2.08	5.12097
rs2343825	23	106640272	T	C	0.1835	0	0.981	rs6622208	0.845354	FALSE						NA			ACP vs. all controls	1.59542	1.34-1.9	6.16476	1.74689	1.37-2.23	4.60448	1.61519	1.31-2	4.72846
rs1682040	23	106285596	G	A	0.1737	0	0.969	rs6622208	0.886837	FALSE						NA			ACP vs. all controls	1.61722	1.35-1.93	6.1623	1.74848	1.36-2.25	4.42952	1.67262	1.35-2.08	5.11829
rs4826964	23	106606915	T	G	0.1834	0	0.982	rs6622208	0.845336	FALSE						NA			ACP vs. all controls	1.59492	1.34-1.9	6.15723	1.74266	1.36-2.23	4.56931	1.61595	1.31-2	4.75225
rs1285744	23	106267712	A	G	0.1737	0	0.966	rs6622208	0.886622	FALSE						NA			ACP vs. all controls	1.61849	1.35-1.94	6.15618	1.75245	1.36-2.25	4.44897	1.67056	1.34-2.08	5.08009
rs6523914	23	106290944	A	G	0.1736	0	0.969	rs6622208	0.886866	FALSE						NA			ACP vs. all controls	1.61595	1.35-1.93	6.14414	1.74821	1.36-2.25	4.42742	1.66978	1.34-2.07	5.08823
rs17211	7	142334744	C	A	0.1025	0	0.923	rs17211	1	TRUE	TRBV20-1 (0 kb, exon/Missense/MODERATE); TRBV19 (7.7 kb); TRBV21-1 (9.7 kb); TRBV22-1 (15 kb); TRBV23-1 (19 kb); TRBV24-1 (29 kb); TRBV25-1 (44 kb)	0.261957	-0.121922	19.22	0.914528	NA	ENST00000390388 | ENST00000390397 | EPHB6 | KEL | PGBD4P1 | PRSS1 | RP5-894A10.2 | TRBV19 | TRBV21-1 | TRBV24-1 | TRBV25-1 | TRBV28 | U66060.1-19 | U66060.1-23 | U66061.1-11 | unnamed		ACP vs. all controls	1.4794	1.28-1.71	6.14208	1.5062	1.25-1.82	4.30234	1.3886	1.15-1.68	2.99003
rs1752316	23	106276869	G	A	0.173	0	0.97	rs6622208	0.886385	FALSE	EEF1A1P40 (0.82 kb, near_gene/Downstream gene/MODIFIER)					NA			ACP vs. all controls	1.6157	1.35-1.93	6.14051	1.75722	1.37-2.26	4.49923	1.67004	1.34-2.08	5.07465
rs1682045	23	106278275	A	T	0.173	0	0.97	rs6622208	0.886384	FALSE	EEF1A1P40 (2.2 kb, near_gene/Downstream gene/MODIFIER)					NA			ACP vs. all controls	1.6157	1.35-1.93	6.14051	1.75722	1.37-2.26	4.49923	1.67004	1.34-2.08	5.07465
rs1152334	23	106312872	G	A	0.1714	0	0.985	rs6622208	0.881039	FALSE	RBM41 (0 kb, 3'utr/3 prime UTR/MODIFIER | intron/NMD transcript/MODIFIER | intron/Intron/MODIFIER | near_gene/Downstream gene/MODIFIER | near_gene/Upstream gene/MODIFIER)					NA			ACP vs. all controls	1.61392	1.35-1.93	6.13931	1.76146	1.37-2.27	4.53316	1.67806	1.35-2.08	5.20934
rs6523952	23	106622952	G	A	0.1835	0	0.982	rs6622208	0.845097	FALSE						NA			ACP vs. all controls	1.59365	1.34-1.9	6.13841	1.7461	1.37-2.23	4.59788	1.6129	1.31-1.99	4.71926
rs5962780	23	106288738	C	T	0.17	0	0.961	rs6622208	0.882603	FALSE						NA			ACP vs. all controls	1.62741	1.36-1.95	6.13769	1.74927	1.36-2.26	4.3522	1.69494	1.36-2.11	5.23679
rs1152323	23	106291380	T	C	0.1753	0	0.962	rs6622208	0.884434	FALSE						NA			ACP vs. all controls	1.61544	1.35-1.93	6.13688	1.75086	1.36-2.25	4.4485	1.67806	1.35-2.08	5.17585
rs5916781	23	106624561	G	A	0.1835	0	0.982	rs6622208	0.845066	FALSE						NA			ACP vs. all controls	1.59315	1.34-1.9	6.13089	1.74451	1.36-2.23	4.58468	1.61265	1.31-1.99	4.71651
rs5916782	23	106624956	T	A	0.1835	0	0.982	rs6622208	0.845068	FALSE						NA			ACP vs. all controls	1.59315	1.34-1.9	6.13089	1.74478	1.36-2.23	4.58688	1.61265	1.31-1.99	4.71651
rs60096066	7	142442287	T	G	0.3355	0	0.868	rs60096066	1	TRUE	TRBV29-1 (5.8 kb); PGBD4P1 (12 kb); TRBV28 (13 kb); PRSS1 (15 kb); TRBV27 (19 kb); TRBVB (23 kb); PRSS3P1 (26 kb); PRSS3P2 (36 kb); TRBV26 (38 kb); WBP1LP1 (44 kb)	0.0405809	-0.156794	9.273	0.819922	0.234 Pancreatitis	C7orf34 | ENST00000390388 | ENST00000390397 | ENST00000390401 | ENST00000390418 | ENST00000390419 | EPHB6 | OR9A2 | PGBD4P1 | PRSS1 | PRSS3P1 | PRSS3P2 | RP5-894A10.2 | TRBV19 | TRBV21-1 | TRBV24-1 | TRBV25-1 | TRBV27 | TRBV28 | TRBV29-1 | TRBV7-8 | U66060.1-19 | U66060.1-21 | U66060.1-23 | U66061.1-11 | unnamed		ACP vs. all controls	1.26406	1.16-1.4	6.12624	1.23931	1.1-1.4	3.13634	1.36351	1.2-1.5	5.96449
chrX:106275882:I	23	106275882	A	AT	0.1737	0	0.967	rs6622208	0.885828	FALSE	EEF1A1P40 (0 kb, nc-exon/Non coding transcript exon/MODIFIER | nc-RNA/Non coding transcript/MODIFIER)					NA			ACP vs. all controls	1.61468	1.35-1.93	6.126	1.74848	1.36-2.25	4.42952	1.66616	1.34-2.07	5.0339
rs80287824	1	16082395	G	T	0.0665	0	0.856	rs148933117	0.801796	FALSE	FBLIM1 (0.71 kb, near_gene/Upstream gene/MODIFIER); TMEM82 (7.9 kb); SLC25A34 (15 kb); PLEKHM2 (21 kb)	0.21585	0.919937	11.63	0.890623	NA	AGMAT | CASP9 | CROCCP3 | DNAJC16 | PLEKHM2 | RP11-288I21.1 | RSC1A1 | SLC25A34	CD97	ACP vs. all controls	1.52091	1.3-1.8	6.1243	1.48876	1.2-1.9	3.18744	1.56642	1.27-1.9	4.09641
rs9928842	16	75242867	C	T	0.1837	0	0.935	rs9928842	1	TRUE	CTRB2 (1.8 kb, near_gene/Upstream gene/MODIFIER); CTRB1 (10 kb); BCAR1 (20 kb); ZFP1 (37 kb)	-0.306357	0.300159	2.811	0.353897	NA	BCAR1 | CFDP1 | CHST6 | CTRB1 | CTRB2 | RFWD3 | RP11-252K23.2 | TMEM170A | ZFP1 | ZNRF1	APLP2 | TCFL5	ACP vs. all controls	1.3369	1.2-1.5	6.12353	1.42126	1.23-1.6	5.33865	1.23839	1.08-1.4	2.2959
rs6523912	23	106282911	G	C	0.1735	0	0.968	rs6622208	0.887174	FALSE						NA			ACP vs. all controls	1.61366	1.35-1.93	6.1115	1.75112	1.36-2.25	4.4506	1.67495	1.35-2.08	5.14293
rs5962375	23	106282976	T	C	0.1735	0	0.968	rs6622208	0.887174	FALSE						NA			ACP vs. all controls	1.61366	1.35-1.93	6.1115	1.75112	1.36-2.25	4.4506	1.67495	1.35-2.08	5.14293
rs11649684	16	75302979	A	G	0.2315	0	0.859	rs11649684	1	TRUE	BCAR1 (1 kb, near_gene/Upstream gene/MODIFIER); CFDP1 (25 kb); CTRB1 (44 kb); CTRB2 (62 kb)	-0.19795	-0.19601	0.917	0.540092	NA	BCAR1 | CFDP1 | CTRB1 | CTRB2 | RFWD3 | RP11-252K23.2 | TMEM170A | ZFP1 | ZNRF1	APLP2 | FABP5	ACP vs. all controls	1.31978	1.19-1.5	6.11138	1.41084	1.23-1.6	5.52824	1.23107	1.08-1.4	2.35347
rs5962805	23	106458492	A	G	0.1775	0	0.957	rs6622208	0.900095	FALSE	PIH1D3 (0 kb, intron/Intron/MODIFIER)					NA			ACP vs. all controls	1.60782	1.35-1.92	6.07618	1.7857	1.39-2.3	4.72788	1.6592	1.34-2.06	5.02506
chrX:106059864:D	23	106059864	CT	C	0.2979	0	0.913	rs5962770	0.993491	FALSE						NA			ACP vs. all controls	1.48352	1.28-1.72	6.0735	1.6672	1.36-2.05	5.34815	1.43688	1.2-1.72	3.85369
rs1294084	23	106452687	G	T	0.2444	0	0.802	rs1298993	0.985134	FALSE	PIH1D3 (0 kb, intron/Intron/MODIFIER); NUP62CL (3 kb, near_gene/Upstream gene/MODIFIER)					NA		ZNF187	ACP vs. all controls	1.56641	1.32-1.9	6.05081	1.75663	1.39-2.2	5.06557	1.51033	1.23-1.9	3.89237
rs1294085	23	106468708	G	T	0.2444	0	0.802	rs1298993	0.985134	FALSE	PIH1D3 (0 kb, intron/Intron/MODIFIER)					NA		ZNF187	ACP vs. all controls	1.56641	1.32-1.9	6.05081	1.75663	1.39-2.2	5.06557	1.5107	1.23-1.9	3.89641
chrX:106283901:D	23	106283901	ATATT	A	0.1782	0	0.949	rs6622208	0.877003	FALSE						NA			ACP vs. all controls	1.60478	1.34-1.92	6.00884	1.77582	1.38-2.28	4.66116	1.64404	1.32-2.04	4.81804
rs1808427	16	75241394	C	T	0.1804	0	0.938	rs9928842	0.975825	FALSE	CTRB2 (0.31 kb, near_gene/Upstream gene/MODIFIER); CTRB1 (12 kb); BCAR1 (22 kb); ZFP1 (35 kb)	-0.911707	0.337991	0.046	0.14047	NA	ADAT1 | BCAR1 | CFDP1 | CHST6 | CTRB1 | CTRB2 | GLG1 | MLKL | RFWD3 | RP11-252A24.7 | RP11-252K23.2 | TMEM170A | ZFP1 | ZNRF1	APLP2 | FABP5 | PDPR | TCFL5	ACP vs. all controls	1.33458	1.19-1.5	5.99913	1.39938	1.22-1.6	4.86755	1.22549	1.06-1.4	2.10544
rs17262	7	142326783	A	G	0.0947	0	0.962	rs62470035	0.804647	FALSE	TRBV19 (0 kb, exon/Synonymous/LOW); TRBV20-1 (7.4 kb); TRBV21-1 (18 kb); TRBV22-1 (22 kb); TRBV23-1 (27 kb); TRBV24-1 (37 kb)	-0.138216	-0.200401	0.135	0.535869	NA	ENST00000390388 | ENST00000390397 | EPHB6 | TRBV19 | U66060.1-19 | U66060.1-23 | U66061.1-11 | unnamed		ACP vs. all controls	1.4815	1.28-1.72	5.97866	1.4764	1.22-1.79	3.81037	1.3953	1.15-1.69	2.99577
rs76047242	23	106059913	T	C	0.0462	0	0.915	rs76047242	1	TRUE	TBC1D8B (0 kb, intron/Intron/MODIFIER | near_gene/Upstream gene/MODIFIER); MORC4 (0 kb, intron/Intron/MODIFIER)					NA		FGFBP2	ACP vs. all controls	2.17284	1.61-2.9	5.96808	1.76598	1.14-2.8	1.78506	2.58559	1.75-3.8	5.22934
rs7391969	23	106611478	G	A	0.1779	0	0.953	rs6622208	0.831856	FALSE						NA			ACP vs. all controls	1.60149	1.34-1.91	5.96199	1.73607	1.35-2.23	4.30738	1.62792	1.31-2.02	4.65068
rs1290405	23	106419802	C	G	0.1701	0	0.96	rs6622208	0.877343	FALSE	NUP62CL (0 kb, intron/NMD transcript/MODIFIER | intron/Intron/MODIFIER)					NA			ACP vs. all controls	1.61138	1.34-1.93	5.96104	1.80822	1.4-2.33	4.81679	1.63252	1.31-2.03	4.59518
chr1:16032902:I	1	16032902	TG	T	0.0693	0	0.949	chr1:16032902:I	1	TRUE	PLEKHM2 (0 kb, intron/Intron/MODIFIER | nc-RNA/Non coding transcript/MODIFIER); SLC25A34 (30 kb); TMEM82 (36 kb); DDI2 (37 kb); RSC1A1 (45 kb)			1.147		NA	AGMAT | CASP9 | CROCCP3 | CTRC | DDI2 | DNAJC16 | PLEKHM2 | RP11-288I21.1 | RP4-798A10.2 | RSC1A1 | SLC25A34 | unnamed	CD97	ACP vs. all controls	1.47059	1.27-1.7	5.96004	1.51263	1.23-1.9	3.78334	1.46092	1.19-1.8	3.48126
rs3740553	10	120803746	T	C	0.4007	0	0.98	rs10787903	0.966217	FALSE	EIF3A (0 kb, intron/Intron/MODIFIER); NANOS1 (9.9 kb); SNORA19 (16 kb); FAM45A (60 kb)			1.591	0.34442	NA	BAG3 | C10orf84 | EIF3A | FAM45A | FAM45B | GRK5 | INPP5F | NANOS1 | PRDX3 | RP11-435O11.2 | SFXN4 | SNORA19 | unnamed	ZMIZ1	ACP vs. all controls	1.2356	1.14-1.34	5.95403	1.2545	1.13-1.4	3.96664	1.2546	1.13-1.4	4.11467
rs1152324	23	106293489	G	T	0.1744	0	0.967	rs6622208	0.885254	FALSE						NA			ACP vs. all controls	1.59972	1.34-1.91	5.93682	1.74398	1.36-2.24	4.39377	1.6592	1.34-2.06	5.00888
rs4826947	23	106281772	A	C	0.1399	0	0.825	rs6622208	0.812882	FALSE						NA			ACP vs. all controls	1.74768	1.41-2.16	5.93406	1.81683	1.35-2.45	3.7228	1.83386	1.42-2.37	5.13136
rs28448408	7	142408866	C	A	0.0641	0	0.9	rs2886944	0.924343	FALSE	TRBV26 (4.9 kb, near_gene/Downstream gene/MODIFIER); TRBVB (10 kb); TRBV27 (14 kb); TRBVA (19 kb); TRBV28 (20 kb); PGBD4P1 (21 kb); TRBV25-1 (30 kb); TRBV29-1 (39 kb); TRBV24-1 (44 kb); PRSS1 (48 kb)	-0.224558	-0.188718	4.116	0.524298	NA	ENST00000390388 | ENST00000390397 | EPHB6 | TRBV19 | U66060.1-19 | U66060.1-23 | U66061.1-11 | unnamed		ACP vs. all controls	1.6375	1.36-1.98	5.91804	1.7029	1.33-2.17	4.295	1.6386	1.28-2.09	3.86967
rs11092578	23	106226443	C	T	0.2203	2	1	rs11092578	1	TRUE	MORC4 (0 kb, intron/Intron/MODIFIER)					NA			ACP vs. all controls	1.51241	1.29-1.77	5.89787	1.55301	1.25-1.94	3.68648	1.42803	1.18-1.73	3.37719
rs148672699	1	60474407	A	G	0.0108	0	0.787	rs148672699	1	TRUE	C1orf87 (0 kb, exon/Missense/MODERATE | nc-exon/Non coding transcript exon/MODIFIER | intron/Intron/MODIFIER | nc-RNA/Non coding transcript/MODIFIER); CYP2J2 (82 kb); PGBD4P8 (89 kb); HOOK1 (130 kb)	-1.10401	-1.3207	0.704	0.324023	NA			ACP vs. all controls	2.75862	1.89-4	5.89764	2.42014	1.41-4.2	2.65724	2.6688	1.49-4.8	2.85706
rs6622139	23	106296350	T	C	0.1754	0	0.983	rs6622208	0.865472	FALSE						NA			ACP vs. all controls	1.58836	1.33-1.9	5.8915	1.6778	1.31-2.15	3.91642	1.66797	1.35-2.07	5.20221
rs10232858	7	142329486	G	A	0.0955	0	0.976	rs62470035	0.808194	FALSE	TRBV19 (2.4 kb, near_gene/Downstream gene/MODIFIER); TRBV20-1 (4.7 kb, near_gene/Upstream gene/MODIFIER); TRBV21-1 (15 kb); TRBV22-1 (20 kb); TRBV23-1 (24 kb); TRBV24-1 (35 kb); TRBV25-1 (49 kb)	-0.277426	-0.20888	1.033	0.51714	NA	AC093673.5 | CASP2 | ENST00000390388 | ENST00000390397 | EPHB6 | GSTK1 | KEL | PGBD4P1 | RP5-894A10.2 | TRBV19 | TRBV21-1 | TRBV24-1 | TRBV28 | TRBV4-1 | U66060.1-19 | U66060.1-23 | U66061.1-11 | unnamed | ZYX		ACP vs. all controls	1.4686	1.27-1.7	5.88	1.4636	1.21-1.77	3.74344	1.3844	1.15-1.67	2.93836
rs7384887	7	142330328	C	A	0.0956	0	0.973	rs62470035	0.810722	FALSE	TRBV19 (3.3 kb, near_gene/Downstream gene/MODIFIER); TRBV20-1 (3.8 kb, near_gene/Upstream gene/MODIFIER); TRBV21-1 (14 kb); TRBV22-1 (19 kb); TRBV23-1 (23 kb); TRBV24-1 (34 kb); TRBV25-1 (48 kb)	-0.246157	-0.210885	3.9	0.600875	NA	ENST00000390388 | ENST00000390397 | EPHB6 | TRBV19 | U66060.1-19 | U66060.1-23 | U66061.1-11 | unnamed		ACP vs. all controls	1.4691	1.27-1.7	5.87527	1.4646	1.21-1.77	3.74833	1.3854	1.15-1.67	2.94422
rs11198766	10	120847793	C	T	0.4027	0	0.988	rs10787903	0.951334	FALSE	EIF3A (7.4 kb); FAM45A (16 kb); SNORA19 (28 kb); SFXN4 (52 kb)			4.347	0.816509	NA	BAG3 | C10orf84 | EIF3A | FAM45A | FAM45B | GRK5 | INPP5F | NANOS1 | PRDX3 | RP11-435O11.2 | SFXN4 | SNORA19 | unnamed	ZMIZ1	ACP vs. all controls	1.233	1.14-1.34	5.87362	1.2444	1.12-1.39	3.74789	1.2658	1.14-1.41	4.42918
rs11198760	10	120841178	T	A	0.4361	0	0.921	rs10787903	0.887538	FALSE	EIF3A (0.78 kb, near_gene/Upstream gene/MODIFIER); SNORA19 (22 kb); FAM45A (22 kb); NANOS1 (47 kb)			6.389	0.187203	NA	BAG3 | C10orf84 | EIF3A | FAM45A | FAM45B | GRK5 | INPP5F | NANOS1 | PRDX3 | RP11-435O11.2 | SFXN4 | SNORA19 | unnamed	ZMIZ1	ACP vs. all controls	1.2393	1.14-1.35	5.87241	1.234	1.1-1.38	3.35608	1.2748	1.14-1.42	4.47814
rs141927667	23	106610395	T	A	0.153	0	0.877	rs4826965	0.890693	FALSE						NA			ACP vs. all controls	1.68169	1.38-2.05	5.86353	1.87033	1.41-2.48	4.46664	1.69781	1.33-2.16	4.44926
rs1988927	23	106522137	C	T	0.2431	0	0.778	rs1298993	0.972502	FALSE						NA		ZNF187	ACP vs. all controls	1.56485	1.32-1.9	5.85447	1.76224	1.39-2.2	4.96856	1.5133	1.23-1.9	3.82166
rs35627987	7	142473513	T	G	0.0581	0	0.79	rs35627987	1	TRUE	PRSS3P1 (1.7 kb, near_gene/Downstream gene/MODIFIER); PRSS3P2 (4.6 kb, near_gene/Upstream gene/MODIFIER); PRSS1 (13 kb); WBP1LP1 (13 kb); TRBJ2-1 (21 kb); TRBJ2-2 (21 kb); TRBJ2-2P (21 kb); TRBJ2-3 (21 kb); TRBJ2-4 (21 kb); TRBJ2-5 (21 kb); TRBJ2-6 (21 kb); TRBJ2-7 (22 kb); TRBV29-1 (25 kb); TRBC2 (25 kb); TRBV30 (37 kb); PGBD4P1 (43 kb); TRBV28 (45 kb); TRBV27 (50 kb)	-0.339183	-0.211613	0.526	0.330351	NA	EPHB6		ACP vs. all controls	1.58028	1.33-1.9	5.84505	1.3986	1.11-1.8	2.10221	1.58479	1.25-2	3.55592
chrX:106439042:D	23	106439042	CA	C	0.1754	0	0.982	rs6622208	0.891689	FALSE						NA			ACP vs. all controls	1.58508	1.33-1.89	5.84438	1.7498	1.36-2.24	4.53906	1.62665	1.31-2.01	4.74295
rs3114475	7	142503567	C	T	0.4845	0	0.986	rs762691	0.912535	FALSE	TRBC2 (3.1 kb, near_gene/Downstream gene/MODIFIER); TRBV30 (6.7 kb); TRBJ2-7 (8.4 kb); TRBJ2-6 (8.6 kb); TRBJ2-5 (8.7 kb); TRBJ2-4 (8.8 kb); TRBJ2-3 (9 kb); TRBJ2-2P (9.1 kb); TRBJ2-2 (9.3 kb); TRBJ2-1 (9.5 kb); WBP1LP1 (16 kb); PRSS3P2 (21 kb); PRSS3P1 (32 kb); PRSS1 (43 kb); EPHB6 (49 kb)	-0.389872	-0.016513	0.799	0.409306	NA	C7orf34 | C7ORF34 | ENST00000390392 | ENST00000390397 | ENST00000390401 | ENST00000390418 | ENST00000390419 | EPHB6 | KEL | PRSS3P1 | PRSS3P2 | TRBV19 | TRBV28 | TRBV30 | TRPV6 | U66060.1-19 | U66060.1-23 | U66061.1-11 | unnamed	FGFBP2	ACP vs. all controls	1.22654	1.14-1.3	5.84059	1.17716	1.06-1.3	2.39867	1.30685	1.18-1.4	5.82936
rs6564241	16	75263974	C	T	0.1708	0	0.934	rs9928842	0.909582	FALSE	BCAR1 (0 kb, intron/NMD transcript/MODIFIER | intron/Intron/MODIFIER | nc-RNA/Non coding transcript/MODIFIER); RP11-331F4.4 (1.9 kb, near_gene/Downstream gene/MODIFIER); CTRB1 (5.2 kb); CTRB2 (23 kb)	0.129297	1.25965	3.597	0.734887	NA	BCAR1 | CFDP1 | CHST6 | CTRB1 | CTRB2 | RFWD3 | RP11-252K23.2 | TMEM170A | ZFP1 | ZNRF1	APLP2 | FABP5 | TCFL5	ACP vs. all controls	1.33905	1.19-1.5	5.8389	1.39801	1.2-1.6	4.59575	1.22941	1.06-1.4	2.07177
rs10886379	10	120847056	C	T	0.4027	0	0.988	rs10787903	0.952441	FALSE	EIF3A (6.7 kb); FAM45A (17 kb); SNORA19 (27 kb); NANOS1 (53 kb)			5.203	0.550207	NA	BAG3 | C10orf84 | EIF3A | FAM45A | FAM45B | GRK5 | INPP5F | NANOS1 | PRDX3 | RP11-435O11.2 | RP11-498J9.2 | SFXN4 | SNORA19 | unnamed	ZMIZ1	ACP vs. all controls	1.232	1.14-1.33	5.83281	1.2414	1.11-1.38	3.67665	1.265	1.14-1.41	4.40834
rs10749286	10	120844620	C	T	0.4025	0	0.982	rs10787903	0.961801	FALSE	EIF3A (4.2 kb, near_gene/Upstream gene/MODIFIER); FAM45A (19 kb); SNORA19 (25 kb); NANOS1 (51 kb)			8.42	0.897506	NA	BAG3 | C10orf84 | EIF3A | FAM45A | FAM45B | GRK5 | INPP5F | NANOS1 | PRDX3 | RP11-435O11.2 | SFXN4 | SNORA19 | unnamed	ZMIZ1	ACP vs. all controls	1.2324	1.14-1.34	5.82353	1.2419	1.11-1.38	3.67699	1.2611	1.13-1.4	4.30727
rs6112176	20	18945580	A	G	0.2193	0	0.974	rs6112176	1	TRUE	C20orf78 (130 kb); SCP2D1 (150 kb); LINC00652 (170 kb); EEF1A1P34 (180 kb)	-0.544445	-0.245968	0.45	0.46619	NA	RP4-718D20.3		ACP vs. all controls	1.2961	1.17-1.43	5.82108	1.2156	1.06-1.39	2.17103	1.3118	1.15-1.5	3.96191
rs8048371	16	75275547	T	C	0.1776	0	0.94	rs9928842	0.897251	FALSE	BCAR1 (0 kb, intron/NMD transcript/MODIFIER | intron/Intron/MODIFIER | near_gene/Downstream gene/MODIFIER | near_gene/Upstream gene/MODIFIER); CTRB1 (17 kb); CTRB2 (34 kb); CFDP1 (52 kb)	-0.539605	0.0316024	2.25	0.60137	NA	BCAR1 | CFDP1 | CHST6 | CTRB1 | CTRB2 | RFWD3 | RP11-252K23.2 | TMEM170A | ZFP1 | ZNRF1	APLP2 | FABP5 | TCFL5	ACP vs. all controls	1.32996	1.19-1.5	5.81395	1.38696	1.2-1.6	4.57534	1.2207	1.05-1.4	2.02216
chr16:75241676:D	16	75241676	A	AC	0.2112	0	0.879	rs9928842	0.853912	FALSE	CTRB2 (0.59 kb, near_gene/Upstream gene/MODIFIER); CTRB1 (11 kb); BCAR1 (21 kb); ZFP1 (36 kb)			0.612		NA	BCAR1 | CFDP1 | CTRB1 | CTRB2 | RFWD3 | RP11-252K23.2 | TMEM170A | ZFP1 | ZNRF1	APLP2 | FABP5	ACP vs. all controls	1.31579	1.19-1.5	5.81312	1.38889	1.2-1.6	4.91123	1.26024	1.1-1.4	2.73253
rs35588588	10	120848350	A	C	0.4047	0	0.982	rs10787903	0.949063	FALSE	EIF3A (8 kb); FAM45A (15 kb); SNORA19 (29 kb); SFXN4 (52 kb)			1.172	0.376679	NA	BAG3 | C10orf84 | EIF3A | FAM45A | FAM45B | GRK5 | INPP5F | NANOS1 | PRDX3 | RP11-435O11.2 | SFXN4 | SNORA19 | unnamed	ZMIZ1	ACP vs. all controls	1.2318	1.14-1.33	5.79919	1.2428	1.11-1.39	3.69826	1.2669	1.14-1.41	4.4579
rs6523947	23	106594216	G	A	0.1845	0	0.847	rs6622208	0.822919	FALSE	DNAJA1P3 (0.67 kb, near_gene/Downstream gene/MODIFIER)					NA			ACP vs. all controls	1.62588	1.35-1.96	5.79797	1.72266	1.32-2.24	3.91163	1.65688	1.32-2.08	4.5524
rs11149811	16	75300708	G	C	0.1725	0	0.934	rs9928842	0.880661	FALSE	BCAR1 (0 kb, intron/Intron/MODIFIER | near_gene/Upstream gene/MODIFIER); CFDP1 (27 kb); CTRB1 (42 kb); CTRB2 (60 kb)	0.366105	2.50248	6.798	0.69127	NA	ADAT1 | BCAR1 | CFDP1 | CHST6 | CTRB1 | CTRB2 | GLG1 | MLKL | RFWD3 | RP11-252K23.2 | TMEM170A | ZFP1 | ZNRF1	APLP2 | FABP5 | PDPR | TCFL5	ACP vs. all controls	1.33601	1.19-1.5	5.79384	1.41203	1.22-1.6	4.87441	1.20817	1.04-1.4	1.80137
rs11198765	10	120846506	T	C	0.4022	0	0.985	rs10787903	0.953943	FALSE	EIF3A (6.1 kb); FAM45A (17 kb); SNORA19 (27 kb); NANOS1 (53 kb)			4.324	0.310248	NA	BAG3 | C10orf84 | EIF3A | FAM45A | FAM45B | GRK5 | INPP5F | NANOS1 | PRDX3 | RP11-435O11.2 | SFXN4 | SNORA19 | unnamed	ZMIZ1	ACP vs. all controls	1.2315	1.14-1.33	5.78704	1.2422	1.11-1.38	3.68407	1.2629	1.13-1.41	4.33996
rs12249648	10	120848274	C	T	0.4042	0	0.979	rs10787903	0.945581	FALSE	EIF3A (7.9 kb); FAM45A (15 kb); SNORA19 (29 kb); SFXN4 (52 kb)			3.751	0.895842	NA	BAG3 | C10orf84 | EIF3A | FAM45A | FAM45B | GRK5 | INPP5F | NANOS1 | PRDX3 | RP11-435O11.2 | SFXN4 | SNORA19 | unnamed	ZMIZ1	ACP vs. all controls	1.232	1.14-1.34	5.78196	1.2408	1.11-1.38	3.65105	1.2687	1.14-1.41	4.47639
rs1397617	10	120832804	C	T	0.4017	0	0.979	rs10787903	0.969577	FALSE	EIF3A (0 kb, intron/Intron/MODIFIER); SNORA19 (13 kb); FAM45A (31 kb); NANOS1 (39 kb)			3.946	0.269011	NA	BAG3 | C10orf84 | EIF3A | FAM45A | FAM45B | GRK5 | INPP5F | NANOS1 | PRDX3 | RP11-435O11.2 | SFXN4 | SNORA19 | unnamed	ZMIZ1	ACP vs. all controls	1.2313	1.14-1.33	5.77894	1.2452	1.12-1.39	3.74352	1.2534	1.12-1.4	4.08443
rs10886373	10	120814449	C	G	0.4014	0	0.981	rs10787903	0.969687	FALSE	EIF3A (0 kb, intron/Intron/MODIFIER | near_gene/Downstream gene/MODIFIER); SNORA19 (5.1 kb); NANOS1 (21 kb); FAM45A (49 kb)			0.132	0.510265	NA	BAG3 | C10orf84 | EIF3A | FAM45A | FAM45B | GRK5 | INPP5F | NANOS1 | PRDX3 | RP11-435O11.2 | SFXN4 | SNORA19 | unnamed	ZMIZ1	ACP vs. all controls	1.2312	1.14-1.33	5.77489	1.2509	1.12-1.39	3.87968	1.2516	1.12-1.39	4.03923
chr16:75232655:D	16	75232655	T	TAA	0.2102	0	0.949	chr16:75232655:D	1	TRUE	CTRB2 (5.3 kb); CTRB1 (20 kb); ZFP1 (27 kb); BCAR1 (30 kb)			6.667		NA	BCAR1 | CFDP1 | CTRB1 | CTRB2 | TMEM170A | ZFP1 | ZNRF1		ACP vs. all controls	1.3009	1.18-1.4	5.76586	1.39704	1.22-1.6	5.3865	1.23153	1.08-1.4	2.4343
chr9:14197788:I	9	14197788	T	TA	0.1322	0	0.97	chr9:14197788:I	1	TRUE	NFIB (0 kb, intron/Intron/MODIFIER); RPL3P11 (160 kb); PES1P2 (210 kb)			5.136		0.884 Metastasis at diagnosis in osteosarcoma	NFIB	C13ORF15 | CTSC	ACP vs. all controls	1.3389	1.2-1.5	5.76244	1.1933	1.02-1.39	1.50401	1.3859	1.18-1.62	4.0105
chr16:75232651:D	16	75232651	A	AGT	0.21	0	0.949	chr16:75232655:D	0.997285	FALSE	CTRB2 (5.3 kb); CTRB1 (20 kb); ZFP1 (27 kb); BCAR1 (30 kb)			1.465		NA	BCAR1 | CFDP1 | CTRB1 | CTRB2 | TMEM170A | ZFP1 | ZNRF1		ACP vs. all controls	1.30056	1.18-1.4	5.75564	1.39373	1.22-1.6	5.31852	1.23289	1.08-1.4	2.45581
rs10803398	1	16097237	G	A	0.1748	2	1	rs10803398	1	TRUE	FBLIM1 (0 kb, intron/Intron/MODIFIER | near_gene/Downstream gene/MODIFIER); TMEM82 (23 kb); SLC25A34 (29 kb); PLEKHM2 (36 kb)	-0.757152	-0.267904	0.515	0.747518	NA	AGMAT | CLCNKA | DNAJC16 | ESPNP | FBLIM1 | NBPF1 | PLEKHM2 | RP11-108M9.5 | RP11-169K16.4 | SDHB | SLC25A34 | SPEN | TMEM82		ACP vs. all controls	1.2933	1.17-1.43	5.75454	1.1682	1.02-1.34	1.51231	1.3559	1.18-1.55	4.56908
rs6112178	20	18954493	A	G	0.2157	0	0.964	rs6112176	0.993483	FALSE	C20orf78 (140 kb); SCP2D1 (160 kb); LINC00652 (180 kb); EEF1A1P34 (190 kb)	1.3105	0.201936	17.14	0.642196	NA	RP4-718D20.3		ACP vs. all controls	1.2969	1.17-1.43	5.74431	1.2153	1.06-1.39	2.12578	1.3137	1.15-1.5	3.92762
rs7195938	16	75276295	G	A	0.1761	0	0.946	rs9928842	0.901396	FALSE	BCAR1 (0 kb, intron/NMD transcript/MODIFIER | intron/Intron/MODIFIER | near_gene/Downstream gene/MODIFIER | near_gene/Upstream gene/MODIFIER); CTRB1 (17 kb); CTRB2 (35 kb); CFDP1 (51 kb)	-0.0305721	-0.129275	5.56	0.710318	NA	BCAR1 | CFDP1 | CHST6 | CTRB1 | CTRB2 | RFWD3 | RP11-252K23.2 | TMEM170A | ZFP1 | ZNRF1	APLP2 | FABP5 | TCFL5	ACP vs. all controls	1.32732	1.19-1.5	5.74124	1.3837	1.19-1.6	4.51751	1.21803	1.05-1.4	1.99062
rs1035540	16	75278795	G	A	0.1759	0	0.946	rs9928842	0.898801	FALSE	BCAR1 (0 kb, intron/NMD transcript/MODIFIER | intron/Intron/MODIFIER | nc-RNA/Non coding transcript/MODIFIER | near_gene/Upstream gene/MODIFIER); CTRB1 (20 kb); CTRB2 (38 kb); CFDP1 (49 kb)	1.04859	5.67333	1.97	0.632824	NA	ADAT1 | BCAR1 | CFDP1 | CHST6 | CTRB1 | CTRB2 | GLG1 | MLKL | RFWD3 | RP11-252A24.7 | RP11-252K23.2 | TMEM170A | ZFP1 | ZNRF1	APLP2 | FABP5 | PDPR | TCFL5	ACP vs. all controls	1.32732	1.19-1.5	5.74124	1.38447	1.2-1.6	4.53107	1.21936	1.05-1.4	2.00856
rs2870472	16	75278841	C	G	0.1759	0	0.946	rs9928842	0.898758	FALSE	BCAR1 (0 kb, intron/NMD transcript/MODIFIER | intron/Intron/MODIFIER | nc-RNA/Non coding transcript/MODIFIER | near_gene/Upstream gene/MODIFIER); CTRB1 (20 kb); CTRB2 (38 kb); CFDP1 (49 kb)	1.24642	5.69472	2.8	0.64786	NA	ADAT1 | BCAR1 | CFDP1 | CHST6 | CTRB1 | CTRB2 | GLG1 | MLKL | RFWD3 | RP11-252A24.7 | RP11-252K23.2 | TMEM170A | ZFP1 | ZNRF1	APLP2 | FABP5 | PDPR | TCFL5	ACP vs. all controls	1.32732	1.19-1.5	5.74124	1.38447	1.2-1.6	4.53107	1.21936	1.05-1.4	2.00856
chrX:106171175:D	23	106171175	TCA	T	0.161	0	0.895	chrX:106171175:D	1	TRUE						NA			ACP vs. all controls	1.64968	1.36-2	5.74122	1.70198	1.3-2.24	3.53204	1.75457	1.39-2.21	5.31096
rs34533100	7	142473067	A	G	0.0584	0	0.788	rs35627987	0.99811	FALSE	PRSS3P1 (1.3 kb, near_gene/Downstream gene/MODIFIER); PRSS3P2 (5 kb, near_gene/Upstream gene/MODIFIER); PRSS1 (12 kb); WBP1LP1 (13 kb); TRBJ2-1 (21 kb); TRBJ2-2 (21 kb); TRBJ2-2P (21 kb); TRBJ2-3 (21 kb); TRBJ2-4 (22 kb); TRBJ2-5 (22 kb); TRBJ2-6 (22 kb); TRBJ2-7 (22 kb); TRBV29-1 (24 kb); TRBC2 (26 kb); TRBV30 (37 kb); PGBD4P1 (42 kb); TRBV28 (44 kb); TRBV27 (49 kb)	-0.295381	-0.201437	2.621	0.573096	NA	EPHB6		ACP vs. all controls	1.57282	1.32-1.9	5.73708	1.39567	1.1-1.8	2.0809	1.58655	1.25-2	3.57069
chr16:75232757:D	16	75232757	T	TC	0.2116	0	0.948	chr16:75232655:D	0.992563	FALSE	CTRB2 (5.2 kb); CTRB1 (20 kb); ZFP1 (27 kb); BCAR1 (30 kb)			7.282		NA	BCAR1 | CFDP1 | CTRB1 | CTRB2 | TMEM170A | ZFP1 | ZNRF1		ACP vs. all controls	1.29921	1.18-1.4	5.73466	1.38504	1.2-1.6	5.16816	1.22654	1.08-1.4	2.36778
rs73547866	7	142409266	A	G	0.0632	0	0.901	rs2886944	0.934429	FALSE	TRBV26 (5.3 kb); TRBVB (9.9 kb); TRBV27 (14 kb); TRBV28 (19 kb); TRBVA (20 kb); PGBD4P1 (21 kb); TRBV25-1 (30 kb); TRBV29-1 (39 kb); TRBV24-1 (45 kb); PRSS1 (48 kb)	-0.346558	-0.158338	3.665	0.722694	NA	ENST00000390388 | ENST00000390397 | EPHB6 | TRBV19 | U66060.1-19 | U66060.1-23 | U66061.1-11 | unnamed		ACP vs. all controls	1.6256	1.35-1.96	5.72961	1.6938	1.33-2.16	4.20188	1.6281	1.27-2.08	3.7618
rs73247912	23	105294070	T	C	0.1055	0	0.669	rs73247912	1	TRUE						0.23 Pancreatitis		CDIPT | PDGFD	ACP vs. Non-alcoholic controls	1.8531	1.45-2.4	5.72401	2.70072	1.85-4	5.76619	1.56445	1.18-2.1	2.43105
rs10787899	10	120798655	G	A	0.4018	0	0.982	rs10787903	0.963058	FALSE	EIF3A (0 kb, intron/Intron/MODIFIER); NANOS1 (4.8 kb, near_gene/Downstream gene/MODIFIER); SNORA19 (21 kb); FAM45A (65 kb)			1.302	0.65022	NA	BAG3 | C10orf84 | EIF3A | FAM45A | FAM45B | GRK5 | INPP5F | NANOS1 | PRDX3 | RP11-435O11.2 | SFXN4 | SNORA19 | unnamed	ZMIZ1	ACP vs. all controls	1.2298	1.13-1.33	5.71836	1.2476	1.12-1.39	3.81252	1.2477	1.12-1.39	3.94196
rs1107593	16	75261329	C	G	0.1735	0	0.942	rs9928842	0.925436	FALSE	RP11-331F4.4 (0 kb, intron/Intron/MODIFIER | nc-RNA/Non coding transcript/MODIFIER | near_gene/Downstream gene/MODIFIER); BCAR1 (1.6 kb, near_gene/Downstream gene/MODIFIER); CTRB1 (2.5 kb, near_gene/Downstream gene/MODIFIER); CTRB2 (20 kb)	-0.0724831	1.65806	0.461	0.517099	NA	ADAT1 | BCAR1 | CFDP1 | CHST6 | CTRB1 | CTRB2 | GLG1 | MLKL | PSMD7 | RFWD3 | RP11-252A24.7 | RP11-252K23.2 | TMEM170A | ZFP1 | ZNRF1	APLP2 | FABP5 | PDPR | TCFL5	ACP vs. all controls	1.32979	1.19-1.5	5.71718	1.38927	1.2-1.6	4.54034	1.21625	1.05-1.4	1.94137
rs12924999	16	75262425	G	T	0.1734	0	0.942	rs9928842	0.923793	FALSE	RP11-331F4.4 (0.33 kb, near_gene/Downstream gene/MODIFIER); BCAR1 (0.5 kb, near_gene/Downstream gene/MODIFIER); CTRB1 (3.6 kb, near_gene/Downstream gene/MODIFIER); CTRB2 (21 kb)	0.06169	1.41498	5.101	0.546616	NA	ADAT1 | BCAR1 | CFDP1 | CHST6 | CTRB1 | CTRB2 | GLG1 | MLKL | RFWD3 | RP11-252A24.7 | RP11-252K23.2 | TMEM170A | ZFP1 | ZNRF1	APLP2 | FABP5 | PDPR | TCFL5	ACP vs. all controls	1.32961	1.19-1.5	5.7124	1.38889	1.2-1.6	4.53359	1.2161	1.05-1.4	1.93943
rs6960231	7	142330656	G	A	0.0985	0	0.98	rs17211	0.923981	FALSE	TRBV20-1 (3.5 kb, near_gene/Upstream gene/MODIFIER); TRBV19 (3.6 kb, near_gene/Downstream gene/MODIFIER); TRBV21-1 (14 kb); TRBV22-1 (19 kb); TRBV23-1 (23 kb); TRBV24-1 (34 kb); TRBV25-1 (48 kb)	-0.302146	-0.205322	5.103	0.784644	NA	AC093673.5 | CASP2 | ENST00000390388 | ENST00000390397 | EPHB6 | GSTK1 | KEL | PGBD4P1 | RP5-894A10.2 | TRBV19 | TRBV21-1 | TRBV24-1 | TRBV28 | TRBV4-1 | U66060.1-19 | U66060.1-23 | U66061.1-11 | unnamed | ZYX		ACP vs. all controls	1.44844	1.25-1.7	5.70909	1.45964	1.2-1.8	3.76483	1.3914	1.15-1.7	3.0862
rs2870471	16	75274282	A	G	0.1816	0	0.941	rs9928842	0.875858	FALSE	BCAR1 (0 kb, intron/NMD transcript/MODIFIER | intron/Intron/MODIFIER | near_gene/Downstream gene/MODIFIER | near_gene/Upstream gene/MODIFIER); CTRB1 (15 kb); CTRB2 (33 kb); CFDP1 (53 kb)	0.662734	4.0319	5.669	0.539872	NA	ADAT1 | BCAR1 | CFDP1 | CHST6 | CTRB1 | CTRB2 | GLG1 | MLKL | RFWD3 | RP11-252K23.2 | TMEM170A | ZFP1 | ZNRF1	APLP2 | FABP5 | PDPR | TCFL5	ACP vs. all controls	1.32275	1.19-1.5	5.70765	1.38408	1.2-1.6	4.57877	1.21183	1.05-1.4	1.94197
rs4751690	10	120849937	G	C	0.4083	0	0.994	rs10787903	0.927648	FALSE	EIF3A (9.5 kb); FAM45A (14 kb); SNORA19 (30 kb); SFXN4 (50 kb)			0.377	0.450219	NA	BAG3 | C10orf84 | EIF3A | FAM45A | FAM45B | GRK5 | INPP5F | NANOS1 | PRDX3 | RP11-435O11.2 | SFXN4 | SNORA19 | unnamed	ZMIZ1	ACP vs. all controls	1.2276	1.13-1.33	5.70454	1.238	1.11-1.38	3.60779	1.267	1.14-1.41	4.50362
chr3:126728393:I	3	126728393	T	TC	0.1664	0	0.849	chr3:126728393:I	1	TRUE	PLXNA1 (0 kb, intron/Intron/MODIFIER); CHCHD6 (49 kb); C3orf56 (180 kb); RCC2P4 (240 kb)			3.175		NA	CHCHD6 | CHST13 | PLXNA1		ACP vs. all controls	1.3563	1.2-1.53	5.70252	1.4373	1.23-1.68	4.7735	1.3548	1.16-1.58	3.65648
rs10400136	10	120833948	G	A	0.4	0	0.976	rs10787903	0.965457	FALSE	EIF3A (0 kb, intron/Intron/MODIFIER); SNORA19 (14 kb); FAM45A (30 kb); NANOS1 (40 kb)			3.573	0.777602	NA	BAG3 | C10orf84 | EIF3A | FAM45A | FAM45B | GRK5 | INPP5F | NANOS1 | PRDX3 | RP11-435O11.2 | SFXN4 | SNORA19 | unnamed	ZMIZ1	ACP vs. all controls	1.23	1.13-1.33	5.70146	1.2426	1.11-1.39	3.6706	1.2504	1.12-1.39	4.0092
rs706	7	142499762	G	A	0.413	0	0.937	rs3114479	0.965136	FALSE	TRBC2 (0 kb, intron/Intron/MODIFIER); TRBJ2-7 (4.6 kb, near_gene/Downstream gene/MODIFIER); TRBJ2-6 (4.8 kb, near_gene/Downstream gene/MODIFIER); TRBJ2-5 (4.9 kb, near_gene/Downstream gene/MODIFIER); TRBJ2-4 (5 kb); TRBJ2-3 (5.2 kb); TRBJ2-2P (5.3 kb); TRBJ2-2 (5.5 kb); TRBJ2-1 (5.7 kb); TRBV30 (11 kb); WBP1LP1 (12 kb); PRSS3P2 (17 kb); PRSS3P1 (28 kb); PRSS1 (39 kb)	-0.162955	-0.173235	8.493	0.368766	NA	C7orf34 | C7ORF34 | ENST00000390392 | ENST00000390401 | ENST00000390418 | ENST00000390419 | EPHB6 | KEL | PRSS3P1 | TRBV30 | TRPV6 | U66060.1-19 | U66060.1-23 | U66061.1-11 | unnamed		ACP vs. all controls	1.23122	1.14-1.3	5.70083	1.23609	1.11-1.4	3.48661	1.28916	1.15-1.4	4.94189
rs4019266	7	142376191	G	A	0.0902	0	0.917	rs62470035	0.893514	FALSE	MTRNR2L6 (0.64 kb, near_gene/Downstream gene/MODIFIER); TRBV25-1 (2.4 kb, near_gene/Upstream gene/MODIFIER); TRBV24-1 (11 kb); TRBVA (13 kb); TRBV23-1 (22 kb); TRBV22-1 (26 kb); TRBV26 (27 kb); TRBV21-1 (31 kb); TRBV20-1 (41 kb); TRBVB (43 kb); TRBV27 (47 kb); TRBV19 (49 kb)	-0.699204	-0.269136	0.492	0.12716	NA	AC091742.5-2 | CLEC5A | ENST00000390388 | ENST00000390397 | EPHB6 | LOC100124692 | MGAM | PGBD4P1 | PRSS1 | RP11-1220K2.2 | RP5-894A10.2 | TAS2R3 | TRBV19 | TRBV21-1 | TRBV24-1 | TRBV25-1 | TRBV28 | U66060.1-19 | U66060.1-23 | U66061.1-11 | unnamed		ACP vs. all controls	1.4924	1.28-1.74	5.70036	1.5259	1.25-1.87	3.98263	1.4415	1.18-1.76	3.22982
rs4751691	10	120850164	A	G	0.4069	2	1	rs10787903	0.915066	FALSE	EIF3A (9.8 kb); FAM45A (13 kb); SNORA19 (31 kb); SFXN4 (50 kb)			2.884	0.25941	NA	BAG3 | C10orf84 | EIF3A | FAM45A | FAM45B | GRK5 | INPP5F | NANOS1 | PRDX3 | RP11-435O11.2 | SFXN4 | SNORA19 | unnamed	ZMIZ1	ACP vs. all controls	1.2261	1.13-1.33	5.69377	1.2359	1.11-1.38	3.58081	1.2713	1.14-1.41	4.63271
rs35084217	1	15781502	C	T	0.201	0	0.891	rs6702946	0.94308	FALSE	CELA2A (1.7 kb, near_gene/Upstream gene/MODIFIER); CTRC (5.8 kb); CELA2B (11 kb); EFHD2 (25 kb); CASP9 (36 kb)	-0.368328	-0.185334	3.065	0.175882	NA	CASP9 | CTRC | DNAJC16 | EFHD2 | PLEKHM2 | SLC25A34 | SPEN		ACP vs. all controls	1.3192	1.18-1.47	5.6829	1.3195	1.14-1.52	3.54654	1.3179	1.14-1.52	3.63087
chr10:120830074:D	10	120830074	AT	A	0.401	0	0.978	rs10787903	0.968901	FALSE	EIF3A (0 kb); SNORA19 (10 kb); FAM45A (34 kb); NANOS1 (36 kb)			5.201		NA	BAG3 | C10orf84 | EIF3A | FAM45A | FAM45B | GRK5 | INPP5F | NANOS1 | PRDX3 | RP11-435O11.2 | SFXN4 | SNORA19 | unnamed	ZMIZ1	ACP vs. all controls	1.2295	1.13-1.33	5.68141	1.2434	1.12-1.39	3.70091	1.2503	1.12-1.39	4.0067
chr16:75232756:D	16	75232756	T	TTC	0.2232	0	0.911	chr16:75232655:D	0.96125	FALSE	CTRB2 (5.2 kb); CTRB1 (20 kb); ZFP1 (27 kb); BCAR1 (30 kb)			8.043		NA	BCAR1 | CFDP1 | CTRB1 | CTRB2 | TMEM170A | ZFP1 | ZNRF1		ACP vs. all controls	1.29735	1.18-1.4	5.67869	1.37571	1.2-1.6	4.94068	1.24254	1.09-1.4	2.62879
rs10886374	10	120814557	T	G	0.403	0	0.976	rs10787903	0.964995	FALSE	EIF3A (0 kb, intron/Intron/MODIFIER | near_gene/Downstream gene/MODIFIER); SNORA19 (5 kb, near_gene/Downstream gene/MODIFIER); NANOS1 (21 kb); FAM45A (49 kb)			4.094	0.464592	NA	BAG3 | C10orf84 | EIF3A | FAM45A | FAM45B | GRK5 | INPP5F | NANOS1 | PRDX3 | RP11-435O11.2 | SFXN4 | SNORA19 | unnamed	ZMIZ1	ACP vs. all controls	1.2294	1.13-1.33	5.6774	1.2477	1.12-1.39	3.79116	1.2518	1.12-1.4	4.0315
rs59320698	7	142481867	G	C	0.4992	0	0.558	rs59320698	1	TRUE	PRSS3P2 (0 kb, nc-exon/Non coding transcript exon/MODIFIER | nc-RNA/Non coding transcript/MODIFIER | near_gene/Downstream gene/MODIFIER); WBP1LP1 (4.6 kb, near_gene/Downstream gene/MODIFIER); PRSS3P1 (10 kb); TRBJ2-1 (12 kb); TRBJ2-2 (12 kb); TRBJ2-2P (13 kb); TRBJ2-3 (13 kb); TRBJ2-4 (13 kb); TRBJ2-5 (13 kb); TRBJ2-6 (13 kb); TRBJ2-7 (13 kb); TRBC2 (17 kb); PRSS1 (21 kb); TRBV30 (28 kb); TRBV29-…	0.809532	-0.0347194	10.81	0.725172	0.265 Pancreatitis	C7orf34 | EPHB6 | PRSS3P1 | PRSS3P2 | TRBV24-1 | TRBV28 | TRBV29-1 | U66060.1-19 | U66060.1-23 | U66061.1-11 | unnamed		ACP vs. all controls	1.30959	1.18-1.4	5.67251	1.35263	1.18-1.6	4.1243	1.27959	1.11-1.5	3.05011
rs7202566	16	75247644	A	C	0.1813	0	0.938	rs9928842	0.96965	FALSE	CTRB1 (5.3 kb); CTRB2 (6.6 kb); BCAR1 (15 kb); ZFP1 (42 kb)	-0.950788	-0.303365	0.164	0.444122	NA	ADAT1 | BCAR1 | CFDP1 | CHST6 | CTRB1 | CTRB2 | GLG1 | MLKL | PSMD7 | RFWD3 | RP11-252A24.7 | RP11-252K23.2 | TMEM170A | ZFP1 | ZNRF1	APLP2 | FABP5 | PDPR | TCFL5	ACP vs. all controls	1.32135	1.19-1.5	5.66903	1.38217	1.2-1.6	4.56643	1.21521	1.05-1.4	1.9746
chr10:120803907:I	10	120803907	TC	T	0.3722	0	0.975	rs10787903	0.86177	FALSE	EIF3A (0 kb, intron/Intron/MODIFIER); NANOS1 (10 kb); SNORA19 (16 kb); FAM45A (60 kb)			1.536		NA	BAG3 | C10orf84 | EIF3A | FAM45A | FAM45B | GRK5 | INPP5F | NANOS1 | PRDX3 | RP11-435O11.2 | SFXN4 | SNORA19 | unnamed	ZMIZ1	ACP vs. all controls	1.23274	1.14-1.3	5.66282	1.25549	1.12-1.4	3.89268	1.24085	1.11-1.4	3.70341
rs5916988	23	105618760	C	T	0.2512	0	0.882	rs5916988	1	TRUE						NA			ACP vs. all controls	1.50109	1.28-1.8	5.65665	1.56367	1.25-2	3.68349	1.47603	1.22-1.8	3.86682
rs4888363	16	75277344	T	A	0.1821	0	0.941	rs9928842	0.870887	FALSE	BCAR1 (0 kb, intron/NMD transcript/MODIFIER | intron/Intron/MODIFIER | nc-RNA/Non coding transcript/MODIFIER | near_gene/Upstream gene/MODIFIER); CTRB1 (19 kb); CTRB2 (36 kb); CFDP1 (50 kb)	-0.833855	0.253997	0.174	0.466625	NA	ADAT1 | BCAR1 | CFDP1 | CHST6 | CTRB1 | CTRB2 | RFWD3 | RP11-252K23.2 | TMEM170A | ZFP1 | ZNRF1	APLP2 | FABP5 | TCFL5	ACP vs. all controls	1.32083	1.19-1.5	5.65459	1.38332	1.2-1.6	4.57603	1.21669	1.05-1.4	2.0078
rs9319481	16	75259478	C	T	0.1741	0	0.94	rs9928842	0.932173	FALSE	RP11-331F4.4 (0.49 kb, near_gene/Upstream gene/MODIFIER); CTRB1 (0.66 kb, near_gene/Downstream gene/MODIFIER); BCAR1 (3.4 kb, near_gene/Downstream gene/MODIFIER); CTRB2 (18 kb)	-0.586533	-0.127986	1.784	0.734666	NA	ADAT1 | BCAR1 | CFDP1 | CHST6 | CTRB1 | CTRB2 | GLG1 | MLKL | PSMD7 | RFWD3 | RP11-252A24.7 | RP11-252K23.2 | TMEM170A | ZFP1 | ZNRF1	APLP2 | FABP5 | PDPR | TCFL5	ACP vs. all controls	1.32679	1.19-1.5	5.65419	1.38523	1.19-1.6	4.49099	1.21788	1.05-1.4	1.96709
rs6564243	16	75296001	C	A	0.1743	0	0.94	rs9928842	0.881467	FALSE	BCAR1 (0 kb, intron/NMD transcript/MODIFIER | intron/Intron/MODIFIER); CFDP1 (32 kb); CTRB1 (37 kb); CTRB2 (55 kb)	0.307181	1.6612	5.329	0.767302	NA	BCAR1 | CFDP1 | CHST6 | CTRB1 | CTRB2 | RFWD3 | RP11-252K23.2 | TMEM170A | ZFP1 | ZNRF1	APLP2 | FABP5 | TCFL5	ACP vs. all controls	1.32679	1.19-1.5	5.65419	1.39958	1.2-1.6	4.73305	1.20555	1.04-1.4	1.79882
rs10810104	9	14190052	A	T	0.1447	0	0.915	chr9:14197788:I	0.869881	FALSE	NFIB (0 kb, intron/Intron/MODIFIER); RPL3P11 (150 kb); PES1P2 (200 kb); LINC00583 (240 kb)	-0.0526938	-0.13977	0.542	0.57879	0.921 Metastasis at diagnosis in osteosarcoma	NFIB	C13ORF15 | CTSC	ACP vs. all controls	1.3332	1.19-1.49	5.64742	1.2023	1.03-1.4	1.6119	1.4189	1.21-1.66	4.56025
chr9:14197792:D	9	14197792	GA	G	0.138	0	0.946	chr9:14197788:I	0.975735	FALSE	NFIB (0 kb); RPL3P11 (160 kb); PES1P2 (210 kb)			0.142		0.848 Metastasis at diagnosis in osteosarcoma	NFIB	C13ORF15 | CTSC	ACP vs. all controls	1.3331	1.19-1.49	5.64478	1.1897	1.02-1.38	1.47298	1.384	1.18-1.62	4.01583
rs4888364	16	75279510	G	A	0.179	0	0.933	rs9928842	0.891476	FALSE	BCAR1 (0 kb, intron/NMD transcript/MODIFIER | intron/Intron/MODIFIER | nc-RNA/Non coding transcript/MODIFIER | near_gene/Upstream gene/MODIFIER); CTRB1 (21 kb); CTRB2 (38 kb); CFDP1 (48 kb)	0.935822	5.88014	0.674	0.406916	NA	BCAR1 | CFDP1 | CHST6 | CTRB1 | CTRB2 | RFWD3 | RP11-252K23.2 | TMEM170A | ZFP1 | ZNRF1	APLP2 | FABP5 | TCFL5	ACP vs. all controls	1.32363	1.19-1.5	5.64049	1.38274	1.19-1.6	4.51135	1.21551	1.05-1.4	1.95701
rs4888365	16	75282247	G	A	0.1751	0	0.951	rs9928842	0.897195	FALSE	BCAR1 (0 kb, intron/NMD transcript/MODIFIER | intron/Intron/MODIFIER | nc-RNA/Non coding transcript/MODIFIER | near_gene/Upstream gene/MODIFIER); CTRB1 (23 kb); CTRB2 (41 kb); CFDP1 (45 kb)	0.959077	4.24205	5.287	0.635156	NA	BCAR1 | CFDP1 | CHST6 | CTRB1 | CTRB2 | RFWD3 | RP11-252K23.2 | TMEM170A | ZFP1 | ZNRF1	APLP2 | FABP5 | TCFL5	ACP vs. all controls	1.32363	1.19-1.5	5.64049	1.38677	1.2-1.6	4.57193	1.21996	1.05-1.4	2.01656
rs889514	16	75272512	G	A	0.1809	0	0.938	rs9928842	0.872509	FALSE	BCAR1 (0 kb, nc-exon/Non coding transcript exon/MODIFIER | intron/NMD transcript/MODIFIER | intron/Intron/MODIFIER | nc-RNA/Non coding transcript/MODIFIER | near_gene/Downstream gene/MODIFIER | near_gene/Upstream gene/MODIFIER); CTRB1 (14 kb); CTRB2 (31 kb); CFDP1 (55 kb)	0.850767	4.41617	4.733	0.791284	NA	BCAR1 | CFDP1 | CHST6 | CTRB1 | CTRB2 | RFWD3 | RP11-252K23.2 | TMEM170A | ZFP1 | ZNRF1	APLP2 | FABP5 | TCFL5	ACP vs. all controls	1.32223	1.19-1.5	5.63842	1.38504	1.2-1.6	4.56301	1.21036	1.05-1.4	1.90967
rs8059190	16	75260797	A	T	0.1791	0	0.94	rs9928842	0.906486	FALSE	RP11-331F4.4 (0 kb, nc-exon/Non coding transcript exon/MODIFIER | intron/Intron/MODIFIER | nc-RNA/Non coding transcript/MODIFIER | near_gene/Upstream gene/MODIFIER); CTRB1 (2 kb, near_gene/Downstream gene/MODIFIER); BCAR1 (2.1 kb, near_gene/Downstream gene/MODIFIER); CTRB2 (20 kb)	-0.284025	1.47073	4.23	0.406969	NA	ADAT1 | BCAR1 | CFDP1 | CHST6 | CTRB1 | CTRB2 | GLG1 | MLKL | RFWD3 | RP11-252K23.2 | TMEM170A | ZFP1 | ZNRF1	APLP2 | FABP5 | PDPR | TCFL5	ACP vs. all controls	1.321	1.19-1.5	5.62306	1.37836	1.19-1.6	4.44452	1.2161	1.05-1.4	1.99093
rs4987704	7	142572304	A	G	0.1062	0	0.782	rs4987704	1	TRUE	TRPV6 (0 kb, exon/Synonymous/LOW | nc-exon/Non coding transcript exon/MODIFIER | nc-RNA/Non coding transcript/MODIFIER | near_gene/Downstream gene/MODIFIER); RP11-114L10.2 (1.3 kb, near_gene/Upstream gene/MODIFIER); EPHB6 (3.5 kb, near_gene/Downstream gene/MODIFIER); TRPV5 (33 kb)	0.813559	0.0589762	12.48	0.859706	NA	C7orf34 | C7ORF34 | CLEC5A | EPHB6 | KEL | OR9A4 | TRBV30 | TRBV5-1 | U66061.1-11 | unnamed		ACP vs. all controls	1.40469	1.23-1.6	5.62157	1.49298	1.23-1.8	4.13415	1.47885	1.23-1.8	4.20074
rs60895333	7	142377482	A	G	0.0895	0	0.924	rs62470035	0.906122	FALSE	TRBV25-1 (1.1 kb, near_gene/Upstream gene/MODIFIER); MTRNR2L6 (1.9 kb, near_gene/Downstream gene/MODIFIER); TRBVA (12 kb); TRBV24-1 (13 kb); TRBV23-1 (24 kb); TRBV26 (26 kb); TRBV22-1 (28 kb); TRBV21-1 (33 kb); TRBVB (42 kb); TRBV20-1 (43 kb); TRBV27 (46 kb)	0.0170548	0.700135	3.192	0.750867	NA	ENST00000390388 | ENST00000390397 | EPHB6 | TRBV19 | U66060.1-19 | U66060.1-23 | U66061.1-11 | unnamed		ACP vs. all controls	1.4877	1.27-1.74	5.62015	1.5265	1.25-1.87	3.99582	1.449	1.19-1.77	3.33072
rs55950542	7	142341061	C	G	0.1988	0	0.781	rs7383917	0.851877	FALSE	TRBV21-1 (3.4 kb, near_gene/Upstream gene/MODIFIER); TRBV20-1 (6.1 kb); TRBV22-1 (8.2 kb); TRBV23-1 (12 kb); TRBV19 (14 kb); TRBV24-1 (23 kb); TRBV25-1 (38 kb); TRBVA (48 kb)	-0.340594	-0.221669	0.49	0.62767	NA	ENST00000390388 | ENST00000390397 | EPHB6 | OR9A2 | PGBD4P1 | PRSS1 | RP5-894A10.2 | TRBV19 | TRBV21-1 | TRBV24-1 | TRBV25-1 | TRBV27 | TRBV28 | TRBV7-8 | U66060.1-19 | U66060.1-21 | U66060.1-23 | U66061.1-11 | unnamed		ACP vs. all controls	1.31666	1.18-1.5	5.61216	1.19717	1.04-1.4	1.69595	1.42106	1.22-1.6	5.14918
rs8057145	16	75256251	G	A	0.1786	0	0.939	rs9928842	0.953805	FALSE	CTRB1 (0 kb, intron/Intron/MODIFIER | near_gene/Upstream gene/MODIFIER); RP11-331F4.4 (3.7 kb, near_gene/Upstream gene/MODIFIER); BCAR1 (6.7 kb); CTRB2 (15 kb)	-0.305431	-0.0881121	4.377	0.583383	NA	ADAT1 | BCAR1 | CFDP1 | CHST6 | CTRB1 | CTRB2 | GLG1 | MLKL | RFWD3 | RP11-252A24.7 | RP11-252K23.2 | TMEM170A | ZFP1 | ZNRF1	APLP2 | FABP5 | PDPR | TCFL5	ACP vs. all controls	1.32118	1.19-1.5	5.60979	1.37912	1.19-1.6	4.47932	1.20919	1.04-1.4	1.88176
rs11641896	16	75300179	C	T	0.1749	0	0.93	rs9928842	0.871223	FALSE	BCAR1 (0 kb, 5'utr/5 prime UTR/MODIFIER | intron/Intron/MODIFIER | near_gene/Upstream gene/MODIFIER); CFDP1 (27 kb); CTRB1 (41 kb); CTRB2 (59 kb)	0.950854	4.53163	6.714	0.72897	NA	BCAR1 | CFDP1 | CHST6 | CTRB1 | CTRB2 | RFWD3 | RP11-252K23.2 | TMEM170A | ZFP1 | ZNRF1	APLP2 | FABP5 | TCFL5	ACP vs. all controls	1.32767	1.19-1.5	5.60656	1.39101	1.2-1.6	4.54928	1.20294	1.04-1.4	1.747
rs62470030	7	142335879	G	T	0.0941	0	0.947	rs62470035	0.871996	FALSE	TRBV20-1 (0.97 kb, near_gene/Downstream gene/MODIFIER); TRBV21-1 (8.5 kb); TRBV19 (8.8 kb); TRBV22-1 (13 kb); TRBV23-1 (18 kb); TRBV24-1 (28 kb); TRBV25-1 (43 kb)	-0.804166	-0.284872	0.271	0.495841	NA	ENST00000390388 | ENST00000390397 | EPHB6 | TRBV19 | U66060.1-19 | U66060.1-23 | U66061.1-11 | unnamed		ACP vs. all controls	1.46499	1.27-1.7	5.59665	1.48368	1.22-1.8	3.853	1.39005	1.15-1.7	2.89837
rs10243991	7	142337300	G	A	0.0942	0	0.944	rs62470035	0.87437	FALSE	TRBV20-1 (2.4 kb, near_gene/Downstream gene/MODIFIER); TRBV21-1 (7.1 kb); TRBV19 (10 kb); TRBV22-1 (12 kb); TRBV23-1 (16 kb); TRBV24-1 (27 kb); TRBV25-1 (41 kb)	-0.421011	-0.150132	1.944	0.33103	NA	ENST00000390388 | ENST00000390397 | EPHB6 | KEL | PGBD4P1 | PRSS1 | RP5-894A10.2 | TRBV19 | TRBV21-1 | TRBV24-1 | TRBV25-1 | TRBV27 | TRBV28 | U66060.1-19 | U66060.1-23 | U66061.1-11 | unnamed		ACP vs. all controls	1.46434	1.27-1.7	5.58513	1.48412	1.22-1.8	3.85122	1.39043	1.15-1.7	2.9025
rs17163571	7	142337675	C	T	0.0934	0	0.939	rs62470035	0.878389	FALSE	TRBV20-1 (2.8 kb, near_gene/Downstream gene/MODIFIER); TRBV21-1 (6.8 kb); TRBV19 (11 kb); TRBV22-1 (12 kb); TRBV23-1 (16 kb); TRBV24-1 (27 kb); TRBV25-1 (41 kb)	-0.155142	-0.0987402	8.241	0.85533	NA	ENST00000390388 | ENST00000390397 | EPHB6 | KEL | PGBD4P1 | PRSS1 | RP5-894A10.2 | TRBV19 | TRBV21-1 | TRBV24-1 | TRBV25-1 | TRBV28 | U66060.1-19 | U66060.1-23 | U66061.1-11 | unnamed		ACP vs. all controls	1.4687	1.26-1.71	5.58469	1.4894	1.23-1.81	3.87045	1.3943	1.15-1.69	2.90884
rs9927264	16	75260241	C	T	0.1752	0	0.943	rs9928842	0.927713	FALSE	RP11-331F4.4 (0 kb, nc-exon/Non coding transcript exon/MODIFIER | nc-RNA/Non coding transcript/MODIFIER | near_gene/Upstream gene/MODIFIER); CTRB1 (1.4 kb, near_gene/Downstream gene/MODIFIER); BCAR1 (2.7 kb, near_gene/Downstream gene/MODIFIER); CTRB2 (19 kb)	-0.140172	1.53079	1.206	0.628679	NA	ADAT1 | BCAR1 | CFDP1 | CHST6 | CTRB1 | CTRB2 | GLG1 | MLKL | RFWD3 | RP11-252A24.7 | RP11-252K23.2 | TMEM170A | ZFP1 | ZNRF1	APLP2 | FABP5 | PDPR | TCFL5	ACP vs. all controls	1.32205	1.19-1.5	5.57982	1.37703	1.19-1.6	4.38961	1.21669	1.05-1.4	1.96848
rs180741377	7	142663079	T	C	0.0206	0	0.749	rs180741377	1	TRUE	KEL (3.3 kb, near_gene/Upstream gene/MODIFIER); C7orf34 (25 kb); TRPV5 (32 kb); OR9A2 (60 kb)	-0.292907	-0.214875	3.716	0.398013	NA	EPHB6 | TRBV7-3		ACP vs. all controls	2.05888	1.54-2.7	5.57385	2.10881	1.43-3.1	3.35049	1.93723	1.32-2.9	2.89519
rs5962338	23	105706751	A	T	0.2491	0	0.861	rs5916988	0.988557	FALSE	NAP1L4P2 (3 kb, near_gene/Downstream gene/MODIFIER)					NA			ACP vs. all controls	1.50504	1.28-1.77	5.57361	1.57176	1.25-1.97	3.679	1.46797	1.21-1.78	3.68184
rs10244384	7	142337602	G	A	0.094	0	0.943	rs62470035	0.877198	FALSE	TRBV20-1 (2.7 kb, near_gene/Downstream gene/MODIFIER); TRBV21-1 (6.8 kb); TRBV19 (11 kb); TRBV22-1 (12 kb); TRBV23-1 (16 kb); TRBV24-1 (27 kb); TRBV25-1 (41 kb)	-0.44827	-0.146767	5.486	0.757093	NA	ENST00000390388 | ENST00000390397 | EPHB6 | TRBV19 | U66060.1-19 | U66060.1-23 | U66061.1-11 | unnamed		ACP vs. all controls	1.4651	1.26-1.7	5.57261	1.4839	1.22-1.8	3.84193	1.3921	1.15-1.69	2.91531
rs8048956	16	75254966	C	G	0.1791	0	0.94	rs9928842	0.958526	FALSE	CTRB1 (0 kb, intron/Intron/MODIFIER | near_gene/Upstream gene/MODIFIER); BCAR1 (8 kb); CTRB2 (14 kb); ZFP1 (49 kb)	-0.332804	-0.217099	0.278	0.555987	NA	ADAT1 | BCAR1 | CFDP1 | CHST6 | CTRB1 | CTRB2 | GLG1 | MLKL | RFWD3 | RP11-252A24.7 | RP11-252K23.2 | TMEM170A | ZFP1 | ZNRF1	APLP2 | FABP5 | PDPR | TCFL5	ACP vs. all controls	1.31909	1.18-1.5	5.57067	1.37514	1.19-1.6	4.41932	1.20817	1.04-1.4	1.87649
rs889515	16	75251299	C	T	0.18	0	0.944	rs9928842	0.967012	FALSE	CTRB1 (1.6 kb, near_gene/Upstream gene/MODIFIER); CTRB2 (10 kb); BCAR1 (12 kb); ZFP1 (45 kb)	-1.12789	0.178639	0.018	0.136926	NA	ADAT1 | BCAR1 | CFDP1 | CHST6 | CTRB1 | CTRB2 | GLG1 | MLKL | RFWD3 | RP11-252A24.7 | RP11-252K23.2 | TMEM170A | ZFP1 | ZNRF1	APLP2 | FABP5 | PDPR | TCFL5	ACP vs. all controls	1.31752	1.18-1.5	5.56373	1.37344	1.19-1.6	4.41034	1.2089	1.04-1.4	1.8944
rs6622111	23	106015338	A	T	0.1385	0	0.839	rs6622111	1	TRUE	RNF128 (0 kb, intron/Intron/MODIFIER)					NA			ACP vs. all controls	1.70668	1.38-2.11	5.56255	1.60048	1.19-2.16	2.47327	1.78623	1.39-2.3	4.86158
rs10886382	10	120854783	G	A	0.402	0	0.976	rs10787903	0.88083	FALSE	FAM45A (8.8 kb); EIF3A (14 kb); SNORA19 (35 kb); SFXN4 (45 kb)			1.079	0.731219	NA	BAG3 | C10orf84 | EIF3A | FAM45A | FAM45B | GRK5 | INPP5F | NANOS1 | PRDX3 | RP11-435O11.2 | SFXN4 | SNORA19 | unnamed	ZMIZ1	ACP vs. all controls	1.2262	1.13-1.33	5.54976	1.2302	1.1-1.37	3.38387	1.2622	1.13-1.41	4.29454
rs141398135	1	15899480	T	C	0.0638	0	0.835	rs141398135	1	TRUE	AGMAT (0 kb, 3'utr/3 prime UTR/MODIFIER); DNAJC16 (0 kb, intron/Intron/MODIFIER | nc-RNA/Non coding transcript/MODIFIER | near_gene/Downstream gene/MODIFIER); CHCHD2P6 (32 kb); DDI2 (45 kb); CASP9 (46 kb)	-0.422719	-0.232213	1.73	0.235571	NA	AGMAT | CASP9 | CROCCP3 | DNAJC16 | PLEKHM2 | RP11-288I21.1 | RSC1A1 | SLC25A34	CD97	ACP vs. all controls	1.50898	1.28-1.8	5.5407	1.46778	1.18-1.9	2.79773	1.47732	1.19-1.9	3.07844
rs12540839	7	142511035	A	G	0.0267	0	0.955	rs12540839	1	TRUE	TRBV30 (0 kb, 5'utr/5 prime UTR/MODIFIER); TRBC2 (11 kb); TRBJ2-7 (16 kb); TRBJ2-6 (16 kb); TRBJ2-5 (16 kb); TRBJ2-4 (16 kb); TRBJ2-3 (16 kb); TRBJ2-2P (17 kb); TRBJ2-2 (17 kb); TRBJ2-1 (17 kb); WBP1LP1 (24 kb); PRSS3P2 (29 kb); PRSS3P1 (39 kb); EPHB6 (42 kb)	0.238525	0.287495	4.564	0.385388	NA	AC004918.1-1 | CLEC5A | EPHB6 | FLJ40852 | KIAA1147 | LOC154761 | MGAM | OR9A1P | TAS2R4 | TAS2R5 | TRBV7-3 | TRBV7-4 | U66060.1-19 | U66061.1-11 | unnamed | WEE2-AS1 | ZYX		ACP vs. all controls	1.75654	1.41-2.2	5.53602	1.81291	1.33-2.4	3.47912	1.73671	1.28-2.4	3.14176
rs4888362	16	75268245	C	T	0.1817	0	0.916	rs9928842	0.850935	FALSE	BCAR1 (0 kb, intron/NMD transcript/MODIFIER | intron/Intron/MODIFIER | nc-RNA/Non coding transcript/MODIFIER | near_gene/Downstream gene/MODIFIER); CTRB1 (9.4 kb); CTRB2 (27 kb); CFDP1 (59 kb)	-0.266019	0.302464	1.307	0.484554	NA	ADAT1 | BCAR1 | CFDP1 | CHST6 | CTRB1 | CTRB2 | GLG1 | MLKL | RFWD3 | RP11-252K23.2 | TMEM170A | ZFP1	APLP2 | PDPR | TCFL5	ACP vs. all controls	1.321	1.18-1.5	5.53384	1.38793	1.2-1.6	4.54894	1.20992	1.04-1.4	1.87909
rs7456884	7	142342478	G	A	0.0891	0	0.941	rs62470035	0.935229	FALSE	TRBV21-1 (1.9 kb, near_gene/Upstream gene/MODIFIER); TRBV22-1 (6.8 kb); TRBV20-1 (7.6 kb); TRBV23-1 (11 kb); TRBV19 (15 kb); TRBV24-1 (22 kb); TRBV25-1 (36 kb); TRBVA (47 kb)	-0.427625	-0.230423	1.094	0.440689	NA	AC093673.5 | CASP2 | ENST00000390388 | ENST00000390397 | EPHB6 | GSTK1 | KEL | PGBD4P1 | RP5-894A10.2 | TRBV19 | TRBV21-1 | TRBV24-1 | TRBV28 | U66060.1-19 | U66060.1-23 | U66061.1-11 | unnamed | ZYX		ACP vs. all controls	1.4787	1.27-1.73	5.52953	1.4763	1.21-1.8	3.572	1.4093	1.16-1.72	2.9718
rs2138717	23	86570173	T	C	0.1359	0	0.864	rs2138717	1	TRUE						NA		CCL20	ACP vs. all controls	1.61332	1.33-2	5.52918	2.0414	1.52-2.8	5.11324	1.59543	1.27-2	3.71369
rs2157430	23	86571119	T	G	0.1359	0	0.864	rs2138717	0.999979	FALSE						NA		CCL20	ACP vs. all controls	1.61291	1.33-2	5.52393	2.04198	1.52-2.8	5.11688	1.59463	1.27-2	3.70675
rs2382450	9	14188857	T	C	0.1387	0	0.945	chr9:14197788:I	0.857668	FALSE	NFIB (0 kb, intron/Intron/MODIFIER); RPL3P11 (150 kb); PES1P2 (200 kb); LINC00583 (240 kb)	1.31757	0.0471778	14.96	0.841199	0.885 Metastasis at diagnosis in osteosarcoma	NFIB	C13ORF15 | CTSC	ACP vs. all controls	1.3297	1.19-1.49	5.52089	1.17	1-1.36	1.25094	1.4058	1.2-1.65	4.30285
rs11950121	5	53178957	A	C	0.4626	0	0.992	rs11950121	1	TRUE	ARL15 (0.82 kb, near_gene/Downstream gene/MODIFIER); ASS1P9 (23 kb); MIR581 (68 kb); MIR4459 (190 kb)	1.2299	0.075116	14.5	0.669293	NA	ARL15 | FST | NDUFS4		ACP vs. all controls	1.2182	1.13-1.32	5.52013	1.2396	1.12-1.38	3.86081	1.1965	1.08-1.33	2.92108
rs5917046	23	106539608	T	C	0.1022	0	0.66	rs5917046	1	TRUE						NA			ACP vs. all controls	2.0218	1.53-2.67	5.51416	2.17445	1.49-3.18	3.85107	2.13774	1.53-2.98	4.79884
rs67487722	10	120804434	A	C	0.3738	0	0.977	rs10787903	0.86585	FALSE	EIF3A (0 kb, intron/Intron/MODIFIER); NANOS1 (11 kb); SNORA19 (15 kb); FAM45A (59 kb)			4.5	0.47831	NA	BAG3 | C10orf84 | EIF3A | FAM45A | FAM45B | GRK5 | INPP5F | NANOS1 | PRDX3 | RP11-435O11.2 | SFXN4 | SNORA19 | unnamed	ZMIZ1	ACP vs. all controls	1.2282	1.14-1.3	5.50888	1.24642	1.11-1.4	3.69151	1.23579	1.11-1.4	3.5832
rs4888361	16	75267676	G	A	0.1769	0	0.938	rs9928842	0.900342	FALSE	BCAR1 (0 kb, intron/NMD transcript/MODIFIER | intron/Intron/MODIFIER | nc-RNA/Non coding transcript/MODIFIER | near_gene/Downstream gene/MODIFIER); CTRB1 (8.9 kb); CTRB2 (27 kb); CFDP1 (60 kb)	-0.302142	0.128647	3.39	0.264813	NA	BCAR1 | CFDP1 | CHST6 | CTRB1 | CTRB2 | RFWD3 | RP11-252K23.2 | TMEM170A | ZFP1 | ZNRF1	APLP2 | FABP5 | TCFL5	ACP vs. all controls	1.31996	1.18-1.5	5.50571	1.38889	1.2-1.6	4.57677	1.20613	1.04-1.4	1.82182
rs71525726	8	6190359	G	A	0.1699	0	0.94	rs71525726	1	TRUE	MCPH1 (74 kb); ANGPT2 (170 kb)	-0.872939	-0.295654	2.222	0.136629	NA		EPHB1	ACP vs. all controls	1.29921	1.18-1.4	5.50425	1.39451	1.2-1.6	4.92027	1.28403	1.11-1.5	3.12317
rs565922	10	120803435	T	C	0.3739	0	0.977	rs10787903	0.866131	FALSE	EIF3A (0 kb, intron/Intron/MODIFIER); NANOS1 (9.6 kb); SNORA19 (16 kb); FAM45A (60 kb)			0.458	0.336012	NA	BAG3 | C10orf84 | EIF3A | FAM45A | FAM45B | GRK5 | INPP5F | NANOS1 | PRDX3 | RP11-435O11.2 | SFXN4 | SNORA19 | unnamed	ZMIZ1	ACP vs. all controls	1.22805	1.14-1.3	5.503	1.24471	1.11-1.4	3.65194	1.23609	1.11-1.4	3.59042
rs658352	10	120803788	C	T	0.3739	0	0.977	rs10787903	0.866142	FALSE	EIF3A (0 kb, intron/Intron/MODIFIER); NANOS1 (9.9 kb); SNORA19 (16 kb); FAM45A (60 kb)			2.51	0.273815	NA	BAG3 | C10orf84 | EIF3A | FAM45A | FAM45B | GRK5 | INPP5F | NANOS1 | PRDX3 | RP11-435O11.2 | SFXN4 | SNORA19 | unnamed	ZMIZ1	ACP vs. all controls	1.22805	1.14-1.3	5.503	1.24456	1.11-1.4	3.64835	1.23609	1.11-1.4	3.59042
rs77940133	7	142664666	C	G	0.0213	0	0.784	rs180741377	0.886285	FALSE	KEL (4.9 kb, near_gene/Upstream gene/MODIFIER); C7orf34 (27 kb); TRPV5 (34 kb); OR9A2 (59 kb)	-0.246461	-0.208715	0.357	0.535914	NA	EPHB6 | TRBV7-3 | U66060.1-19 | U66061.1-11 | unnamed		ACP vs. all controls	2.0008	1.52-2.6	5.49231	1.97433	1.35-2.9	3.138	1.94363	1.33-2.9	3.05446
rs565421	1	15782128	C	T	0.3205	0	0.917	rs565421	1	TRUE	CELA2A (1.1 kb, near_gene/Upstream gene/MODIFIER); CTRC (6.4 kb); CELA2B (10 kb); EFHD2 (25 kb); CASP9 (35 kb)	-0.249509	0.0736601	4.654	0.54868	NA	CASP9 | CTRC | DNAJC16 | EFHD2 | PLEKHM2 | SLC25A34 | SPEN | TMEM51		ACP vs. all controls	1.2537	1.15-1.37	5.47867	1.3001	1.15-1.47	4.25591	1.2718	1.13-1.43	3.82733
rs16980801	23	86574331	T	A	0.1359	0	0.862	rs2138717	0.999573	FALSE						NA		CCL20	ACP vs. all controls	1.61045	1.33-2	5.47223	2.04432	1.52-2.8	5.11942	1.59221	1.25-2	3.68598
rs541296	1	15781220	C	T	0.3171	0	0.923	rs565421	0.967108	FALSE	CELA2A (2 kb, near_gene/Upstream gene/MODIFIER); CTRC (5.5 kb); CELA2B (11 kb); EFHD2 (24 kb); CASP9 (36 kb)	-0.283705	0.0221036	2.677	0.431724	NA	CASP9 | CTRC | DNAJC16 | EFHD2 | PLEKHM2 | SLC25A34 | SPEN | TMEM51		ACP vs. all controls	1.2533	1.15-1.37	5.46486	1.3018	1.15-1.47	4.34231	1.266	1.12-1.43	3.72332
rs113340515	23	106539529	T	C	0.1132	0	0.527	rs113340515	1	TRUE						NA			ACP vs. all controls	2.12197	1.57-2.86	5.46158	2.22636	1.5-3.31	3.75504	2.17415	1.51-3.12	4.27991
rs4888356	16	75228886	A	G	0.2023	0	0.957	chr16:75232655:D	0.964695	FALSE	RP11-331F4.1 (1.7 kb, near_gene/Upstream gene/MODIFIER); CTRB2 (9.1 kb); ZFP1 (23 kb); CTRB1 (24 kb); BCAR1 (34 kb)	-0.44341	-0.233032	0.947	0.359884	NA	AC009120.4 | BCAR1 | CFDP1 | CHST6 | CTRB1 | CTRB2 | GLG1 | MLKL | RFWD3 | RP11-252K23.2 | TMEM170A | ZFP1 | ZNRF1	PDPR | TCFL5	ACP vs. Non-alcoholic controls	1.29016	1.16-1.4	5.44458	1.40272	1.22-1.6	5.48961	1.2025	1.05-1.4	1.99031
rs7519812	1	16024189	T	C	0.0729	0	0.97	chr1:16032902:I	0.915467	FALSE	PLEKHM2 (0 kb, intron/Intron/MODIFIER | nc-RNA/Non coding transcript/MODIFIER); DDI2 (29 kb); RSC1A1 (36 kb); SLC25A34 (39 kb); TMEM82 (45 kb)	-0.0946426	-0.0112813	12.56	0.828299	NA	AGMAT | CASP9 | CROCCP3 | CTRC | DDI2 | DNAJC16 | PLEKHM2 | RP11-288I21.1 | RSC1A1 | SLC25A34 | unnamed	CD97	ACP vs. all controls	1.42633	1.23-1.6	5.43672	1.43164	1.18-1.8	3.18344	1.46929	1.2-1.8	3.72902
rs34810059	5	57377872	C	T	0.056	0	0.713	rs34810059	1	TRUE	PGAM1P1 (79 kb)	-0.140772	-0.193243	5.706	0.839461	NA	GAPT		ACP vs. Non-alcoholic controls	1.61473	1.33-2	5.43612	1.972	1.52-2.6	5.529	1.42755	1.11-1.9	2.05955
rs17326228	23	106239318	C	T	0.1634	0	0.919	chrX:106171175:D	0.985115	FALSE	MORC4 (0 kb, intron/Intron/MODIFIER | near_gene/Upstream gene/MODIFIER)					NA			ACP vs. all controls	1.60529	1.33-1.94	5.42656	1.64378	1.26-2.15	3.24857	1.69	1.35-2.12	4.91711
rs8061356	16	75294232	A	G	0.1841	0	0.93	rs9928842	0.833943	FALSE	BCAR1 (0 kb, intron/NMD transcript/MODIFIER | intron/Intron/MODIFIER | near_gene/Upstream gene/MODIFIER); CFDP1 (33 kb); CTRB1 (35 kb); CTRB2 (53 kb)	-0.535826	-0.226837	3.398	0.665024	NA	BCAR1 | CFDP1 | CHST6 | CTRB1 | CTRB2 | RFWD3 | RP11-252K23.2 | TMEM170A | ZFP1 | ZNRF1	APLP2 | FABP5 | TCFL5	ACP vs. all controls	1.31285	1.18-1.5	5.41885	1.37893	1.19-1.6	4.49747	1.19133	1.03-1.4	1.65604
rs4019269	7	142376282	G	A	0.0915	0	0.922	rs62470035	0.895464	FALSE	MTRNR2L6 (0.73 kb, near_gene/Downstream gene/MODIFIER); TRBV25-1 (2.3 kb, near_gene/Upstream gene/MODIFIER); TRBV24-1 (12 kb); TRBVA (13 kb); TRBV23-1 (22 kb); TRBV22-1 (27 kb); TRBV26 (27 kb); TRBV21-1 (31 kb); TRBV20-1 (41 kb); TRBVB (43 kb); TRBV27 (47 kb); TRBV19 (49 kb)	-0.508974	-0.240266	1.766	0.584145	NA	ENST00000390388 | ENST00000390397 | EPHB6 | TRBV19 | U66060.1-19 | U66060.1-23 | U66061.1-11 | unnamed		ACP vs. all controls	1.4692	1.26-1.71	5.41668	1.5023	1.23-1.84	3.80109	1.428	1.17-1.74	3.16282
rs28496944	7	142376380	A	G	0.0915	0	0.922	rs62470035	0.895652	FALSE	MTRNR2L6 (0.83 kb, near_gene/Downstream gene/MODIFIER); TRBV25-1 (2.2 kb, near_gene/Upstream gene/MODIFIER); TRBV24-1 (12 kb); TRBVA (13 kb); TRBV23-1 (22 kb); TRBV22-1 (27 kb); TRBV26 (27 kb); TRBV21-1 (31 kb); TRBV20-1 (41 kb); TRBVB (43 kb); TRBV27 (47 kb); TRBV19 (49 kb)	0.047988	0.598345	2.83	0.604966	NA	ENST00000390388 | ENST00000390397 | EPHB6 | TRBV19 | U66060.1-19 | U66060.1-23 | U66061.1-11 | unnamed		ACP vs. all controls	1.4682	1.26-1.71	5.41187	1.5002	1.23-1.83	3.77848	1.4277	1.17-1.74	3.16497
rs4751692	10	120850222	C	T	0.4399	0	0.929	rs10787903	0.8496	FALSE	EIF3A (9.8 kb); FAM45A (13 kb); SNORA19 (31 kb); SFXN4 (50 kb)			8.545	0.83828	NA	BAG3 | C10orf84 | EIF3A | FAM45A | FAM45B | GRK5 | INPP5F | NANOS1 | PRDX3 | RP11-435O11.2 | SFXN4 | SNORA19 | unnamed	ZMIZ1	ACP vs. all controls	1.2262	1.13-1.33	5.40786	1.2272	1.1-1.37	3.26553	1.2543	1.12-1.4	3.98059
rs76288851	3	126735015	C	T	0.1248	0	0.929	rs76288851	1	TRUE	PLXNA1 (0 kb, intron/Intron/MODIFIER); CHCHD6 (56 kb); C3orf56 (180 kb); RCC2P4 (250 kb)	0.126796	2.22268	1.861	0.441039	NA	CHCHD6 | CHST13 | MGLL | PLXNA1		ACP vs. all controls	1.385	1.22-1.58	5.39384	1.4493	1.22-1.72	4.18361	1.3455	1.13-1.6	2.93057
rs143574960	23	106212077	C	G	0.1631	0	0.917	chrX:106171175:D	0.984244	FALSE	MORC4 (0 kb, intron/Intron/MODIFIER)					NA			ACP vs. all controls	1.60428	1.33-1.94	5.39368	1.64481	1.26-2.15	3.24741	1.68948	1.35-2.12	4.89696
rs2285027	7	142344964	T	C	0.0919	0	0.936	rs62470035	0.914725	FALSE	TRBV21-1 (0.077 kb, near_gene/Downstream gene/MODIFIER); TRBV22-1 (4.3 kb, near_gene/Upstream gene/MODIFIER); TRBV23-1 (8.5 kb); TRBV20-1 (10 kb); TRBV19 (18 kb); TRBV24-1 (19 kb); TRBV25-1 (34 kb); TRBVA (44 kb)	-0.0466127	-0.166657	4.868	0.473515	NA	ENST00000390388 | ENST00000390397 | EPHB6 | TRBV19 | U66060.1-19 | U66060.1-23 | U66061.1-11 | unnamed		ACP vs. all controls	1.46349	1.25-1.7	5.39239	1.46563	1.2-1.8	3.51182	1.39704	1.15-1.7	2.88847
rs35585298	18	73702233	C	T	0.2489	0	0.907	rs35585298	1	TRUE		-1.13516	-0.330666	0.052	0.34683	NA	LOC284276	SFXN3	ACP vs. all controls	1.2726	1.16-1.4	5.38741	1.2305	1.08-1.4	2.54458	1.2063	1.06-1.37	2.29514
rs17163601	7	142375798	T	C	0.0915	0	0.922	rs62470035	0.896295	FALSE	MTRNR2L6 (0.25 kb, near_gene/Downstream gene/MODIFIER); TRBV25-1 (2.8 kb, near_gene/Upstream gene/MODIFIER); TRBV24-1 (11 kb); TRBVA (13 kb); TRBV23-1 (22 kb); TRBV22-1 (26 kb); TRBV26 (28 kb); TRBV21-1 (31 kb); TRBV20-1 (41 kb); TRBVB (43 kb); TRBV27 (47 kb); TRBV19 (49 kb)	-0.296607	-0.215209	0.969	0.563798	NA	AC093673.5 | ENST00000390388 | ENST00000390397 | EPHB6 | GSTK1 | KEL | PGBD4P1 | PRSS1 | RP5-894A10.2 | TRBV19 | TRBV21-1 | TRBV24-1 | TRBV25-1 | TRBV28 | U66060.1-19 | U66060.1-23 | U66061.1-11 | unnamed | ZYX		ACP vs. all controls	1.4664	1.26-1.71	5.38105	1.4995	1.23-1.83	3.77736	1.4248	1.17-1.74	3.12901
chr9:15057589:I	9	15057589	AT	A	0.0135	0	0.69	chr9:15057589:I	1	TRUE	RP11-54D18.4 (1.5 kb, near_gene/Downstream gene/MODIFIER); TTC39B (110 kb); LDHAP4 (140 kb); FREM1 (150 kb)			0.168		NA			ACP vs. all controls	2.45158	1.72-3.6	5.38033	2.36016	1.45-3.8	2.92043	3.25309	1.85-5.6	4.10913
rs762688	7	142103326	C	T	0.1784	0	0.957	rs762688	1	TRUE	TRBV6-9 (0.8 kb, near_gene/Downstream gene/MODIFIER); TRBV7-8 (3.3 kb, near_gene/Upstream gene/MODIFIER); TRBV5-7 (8.1 kb); TRBV7-7 (16 kb); TRBV6-8 (21 kb); TRBV5-6 (28 kb); TRBV7-6 (36 kb); TRBV6-7 (40 kb); TRBV5-5 (46 kb)	-0.503866	-0.0808628	0.829	0.553527	0.644 Capecitabine sensitivity	ENST00000390388 | U66060.1-19 | unnamed	ADAD2 | CACNA1F | OR2H1 | PALLD	ACP vs. all controls	1.28502	1.16-1.4	5.36685	1.25	1.09-1.4	2.6177	1.28172	1.12-1.5	3.23006
rs361434	7	142104144	C	T	0.179	0	0.954	rs762688	0.998142	FALSE	TRBV6-9 (0 kb, exon/Synonymous/LOW); TRBV7-8 (4.2 kb, near_gene/Upstream gene/MODIFIER); TRBV5-7 (7.2 kb); TRBV7-7 (16 kb); TRBV6-8 (20 kb); TRBV5-6 (27 kb); TRBV7-6 (35 kb); TRBV6-7 (40 kb); TRBV5-5 (45 kb)	0.611346	-0.0407395	0.315	0.57836	0.644 Capecitabine sensitivity	ENST00000390388 | U66060.1-19 | unnamed	ADAD2 | CACNA1F | OR2H1 | PALLD	ACP vs. all controls	1.28502	1.16-1.4	5.36685	1.2486	1.09-1.4	2.58955	1.28139	1.12-1.5	3.21648
chrX:106281768:I	23	106281768	A	AAGAC	0.1492	0	0.859	rs6622208	0.84239	FALSE						NA			ACP vs. all controls	1.64943	1.35-2.02	5.36414	1.76279	1.33-2.33	3.75581	1.72003	1.35-2.19	4.57779
rs17837474	7	142377014	A	G	0.0906	0	0.926	rs62470035	0.897687	FALSE	MTRNR2L6 (1.5 kb, near_gene/Downstream gene/MODIFIER); TRBV25-1 (1.6 kb, near_gene/Upstream gene/MODIFIER); TRBVA (12 kb); TRBV24-1 (12 kb); TRBV23-1 (23 kb); TRBV26 (26 kb); TRBV22-1 (27 kb); TRBV21-1 (32 kb); TRBV20-1 (42 kb); TRBVB (42 kb); TRBV27 (46 kb); TRBV19 (50 kb)	-0.297097	-0.188142	4.322	0.641029	NA	AC093673.5 | ENST00000390388 | ENST00000390397 | EPHB6 | GSTK1 | KEL | PGBD4P1 | PRSS1 | RP5-894A10.2 | TRBV19 | TRBV21-1 | TRBV24-1 | TRBV25-1 | TRBV28 | U66060.1-19 | U66060.1-23 | U66061.1-11 | unnamed | ZYX		ACP vs. all controls	1.4668	1.26-1.71	5.36348	1.4954	1.22-1.83	3.7081	1.4322	1.17-1.75	3.19656
rs2591158	2	155647666	T	G	0.3511	0	0.897	rs2591158	1	TRUE	KCNJ3 (0 kb, intron/Intron/MODIFIER | nc-RNA/Non coding transcript/MODIFIER); CBX3P6 (150 kb); RNA5SP107 (200 kb)	-0.113572	-0.191141	0.723	0.36762	NA		HSPB1	ACP vs. all controls	1.24239	1.14-1.4	5.36086	1.26614	1.12-1.4	3.78968	1.18147	1.05-1.3	2.16718
rs11799513	1	16110324	A	G	0.1783	0	0.953	rs10803398	0.953382	FALSE	FBLIM1 (0 kb, intron/Intron/MODIFIER | nc-RNA/Non coding transcript/MODIFIER); TMEM82 (36 kb); SLC25A34 (42 kb); PLEKHM2 (49 kb)	-0.356968	-0.221996	1.219	0.680982	NA	AGMAT | CLCNKA | DNAJC16 | FBLIM1 | PLEKHM2 | RP11-169K16.4 | SLC25A34 | SPEN | TMEM82		ACP vs. all controls	1.28535	1.16-1.4	5.35809	1.17398	1.02-1.4	1.5419	1.36017	1.19-1.6	4.51501
rs193275523	7	142104667	G	C	0.179	0	0.953	rs762688	0.998124	FALSE	TRBV6-9 (0.11 kb); TRBV7-8 (4.7 kb); TRBV5-7 (6.7 kb); TRBV7-7 (15 kb); TRBV6-8 (19 kb); TRBV5-6 (27 kb); TRBV7-6 (35 kb); TRBV6-7 (39 kb); TRBV5-5 (44 kb)	-1.12924	-0.314296	0.06	0.354075	0.644 Capecitabine sensitivity	ENST00000390388 | U66060.1-19 | unnamed	ADAD2 | CACNA1F | OR2H1 | PALLD	ACP vs. all controls	1.28518	1.16-1.4	5.3532	1.24875	1.09-1.4	2.59197	1.28139	1.12-1.5	3.21648
rs6616617	23	106234294	T	C	0.1663	0	0.906	chrX:106171175:D	0.97516	FALSE	MORC4 (0 kb, intron/Intron/MODIFIER)					NA			ACP vs. all controls	1.59795	1.32-1.93	5.35289	1.63226	1.25-2.13	3.17852	1.68377	1.34-2.11	4.87088
rs10749288	10	120853799	T	G	0.3989	0	0.982	rs10787903	0.87845	FALSE	FAM45A (9.8 kb); EIF3A (13 kb); SNORA19 (34 kb); SFXN4 (46 kb)			0.625	0.604229	NA	BAG3 | C10orf84 | EIF3A | FAM45A | FAM45B | GRK5 | INPP5F | NANOS1 | PRDX3 | RP11-435O11.2 | SFXN4 | SNORA19 | unnamed	ZMIZ1	ACP vs. all controls	1.2206	1.13-1.32	5.35243	1.2197	1.09-1.36	3.16767	1.2545	1.13-1.4	4.13828
rs2015603	7	142103912	G	A	0.1791	0	0.954	rs762688	0.998132	FALSE	TRBV6-9 (0.21 kb); TRBV7-8 (3.9 kb); TRBV5-7 (7.5 kb); TRBV7-7 (16 kb); TRBV6-8 (20 kb); TRBV5-6 (27 kb); TRBV7-6 (35 kb); TRBV6-7 (40 kb); TRBV5-5 (45 kb)	-0.624922	-0.226582	0.684	0.500284	0.637 Capecitabine sensitivity	ENST00000390388 | TRBV7-4 | U66060.1-19 | unnamed	ADAD2 | CACNA1F | OR2H1 | PALLD	ACP vs. all controls	1.28452	1.16-1.4	5.35214	1.24782	1.09-1.4	2.57743	1.28123	1.12-1.5	3.21365
rs1927309	23	106255190	A	G	0.154	0	0.912	rs1927309	1	TRUE						NA			ACP vs. all controls	1.61748	1.33-1.96	5.34305	1.72266	1.31-2.27	3.63529	1.69599	1.34-2.14	4.75496
chr10:120842247:I	10	120842247	GT	G	0.3765	0	0.978	rs10787903	0.866176	FALSE	EIF3A (1.9 kb, near_gene/Upstream gene/MODIFIER); FAM45A (21 kb); SNORA19 (23 kb); NANOS1 (48 kb)			0.443		NA	BAG3 | C10orf84 | EIF3A | FAM45A | FAM45B | GRK5 | INPP5F | NANOS1 | PRDX3 | RP11-435O11.2 | SFXN4 | SNORA19 | unnamed	ZMIZ1	ACP vs. all controls	1.22324	1.12-1.3	5.3397	1.23016	1.1-1.4	3.352	1.2427	1.11-1.4	3.7829
rs11719489	3	126733053	C	T	0.1406	0	0.951	chr3:126728393:I	0.853671	FALSE	PLXNA1 (0 kb, exon/Synonymous/LOW); CHCHD6 (54 kb); C3orf56 (180 kb); RCC2P4 (250 kb)	0.640714	2.17055	16.31	0.923785	NA	CHCHD6 | CHST13 | MGLL | PLXNA1		ACP vs. all controls	1.351	1.2-1.53	5.33345	1.4521	1.24-1.7	4.79995	1.3514	1.15-1.59	3.40944
rs4454297	8	6190390	C	T	0.1717	0	0.926	rs71525726	0.938745	FALSE	MCPH1 (74 kb); ANGPT2 (170 kb)	-0.735217	-0.274452	1.515	0.342907	NA		EPHB1	ACP vs. all controls	1.2945	1.16-1.4	5.33267	1.3725	1.19-1.6	4.4685	1.294	1.12-1.5	3.25068
chr7:142411639:D	7	142411639	TTAAA	T	0.0652	0	0.853	rs2886944	0.871475	FALSE	TRBVB (7.6 kb); TRBV26 (7.6 kb); TRBV27 (12 kb); TRBV28 (17 kb); PGBD4P1 (19 kb); TRBVA (22 kb); TRBV25-1 (33 kb); TRBV29-1 (36 kb); PRSS1 (46 kb); TRBV24-1 (47 kb)			7.192		NA	ENST00000390388 | ENST00000390397 | EPHB6 | TRBV19 | U66060.1-19 | U66060.1-23 | U66061.1-11 | unnamed		ACP vs. all controls	1.6015	1.32-1.94	5.32898	1.71	1.34-2.19	4.24588	1.6452	1.28-2.11	3.81225
rs1500986	10	120788547	G	A	0.4092	0	0.985	rs10787903	0.92631	FALSE	NANOS1 (0.68 kb, near_gene/Upstream gene/MODIFIER); EIF3A (5.8 kb); SNORA19 (31 kb); FAM45A (75 kb)			11.88	0.946537	NA	BAG3 | C10orf84 | EIF3A | FAM45A | FAM45B | GRK5 | INPP5F | NANOS1 | PRDX3 | RP11-435O11.2 | SFXN4 | SNORA19 | unnamed	ZMIZ1	ACP vs. all controls	1.2187	1.13-1.32	5.32429	1.2334	1.11-1.37	3.51108	1.2346	1.11-1.37	3.66782
rs4259754	10	120835384	C	G	0.4127	0	0.933	rs10787903	0.922653	FALSE	EIF3A (0 kb, intron/Intron/MODIFIER); SNORA19 (16 kb); FAM45A (28 kb); NANOS1 (42 kb)			1.645	0.682828	NA	BAG3 | C10orf84 | EIF3A | FAM45A | FAM45B | GRK5 | INPP5F | NANOS1 | PRDX3 | RP11-435O11.2 | SFXN4 | SNORA19 | unnamed	ZMIZ1	ACP vs. all controls	1.2252	1.13-1.33	5.32368	1.238	1.11-1.38	3.45559	1.2398	1.11-1.38	3.63329
rs11198762	10	120842210	G	C	0.3762	0	0.979	rs10787903	0.866178	FALSE	EIF3A (1.8 kb, near_gene/Upstream gene/MODIFIER); FAM45A (21 kb); SNORA19 (23 kb); NANOS1 (48 kb)			2.461	0.567157	NA	BAG3 | C10orf84 | EIF3A | FAM45A | FAM45B | GRK5 | INPP5F | NANOS1 | PRDX3 | RP11-435O11.2 | SFXN4 | SNORA19 | unnamed	ZMIZ1	ACP vs. all controls	1.22279	1.12-1.3	5.32237	1.23183	1.1-1.4	3.38963	1.24085	1.11-1.4	3.7381
rs2226969	7	142503786	G	A	0.4691	0	0.988	rs762691	0.922324	FALSE	TRBC2 (3.4 kb, near_gene/Downstream gene/MODIFIER); TRBV30 (6.5 kb); TRBJ2-7 (8.6 kb); TRBJ2-6 (8.8 kb); TRBJ2-5 (8.9 kb); TRBJ2-4 (9.1 kb); TRBJ2-3 (9.2 kb); TRBJ2-2P (9.4 kb); TRBJ2-2 (9.5 kb); TRBJ2-1 (9.7 kb); WBP1LP1 (16 kb); PRSS3P2 (21 kb); PRSS3P1 (32 kb); PRSS1 (43 kb); EPHB6 (49 kb)	-0.414716	0.0905749	2.217	0.517912	NA	C7orf34 | C7ORF34 | ENST00000390392 | ENST00000390401 | ENST00000390418 | ENST00000390419 | EPHB6 | KEL | PRSS3P1 | TRBV30 | TRPV6 | U66060.1-19 | U66060.1-23 | U66061.1-11 | unnamed		ACP vs. alcoholic controls	1.21389	1.12-1.3	5.32041	1.16754	1.05-1.3	2.20345	1.29299	1.16-1.4	5.42018
rs3824830	10	120840661	G	A	0.3763	0	0.979	rs10787903	0.867563	FALSE	EIF3A (0.26 kb, near_gene/Upstream gene/MODIFIER); SNORA19 (21 kb); FAM45A (23 kb); NANOS1 (47 kb)			4.124	0.5807	NA	BAG3 | C10orf84 | EIF3A | FAM45A | FAM45B | GRK5 | INPP5F | NANOS1 | PRDX3 | RP11-435O11.2 | SFXN4 | SNORA19 | unnamed	ZMIZ1	ACP vs. all controls	1.22264	1.12-1.3	5.3166	1.23107	1.1-1.4	3.36218	1.24039	1.11-1.4	3.71537
rs3114476	7	142503124	A	G	0.4705	0	0.985	rs762691	0.921641	FALSE	TRBC2 (2.7 kb, near_gene/Downstream gene/MODIFIER); TRBV30 (7.1 kb); TRBJ2-7 (7.9 kb); TRBJ2-6 (8.1 kb); TRBJ2-5 (8.3 kb); TRBJ2-4 (8.4 kb); TRBJ2-3 (8.5 kb); TRBJ2-2P (8.7 kb); TRBJ2-2 (8.8 kb); TRBJ2-1 (9 kb); WBP1LP1 (16 kb); PRSS3P2 (21 kb); PRSS3P1 (31 kb); PRSS1 (42 kb); EPHB6 (50 kb)	-0.231876	-0.161699	2.304	0.567881	NA	C7orf34 | C7ORF34 | ENST00000390392 | ENST00000390401 | ENST00000390418 | ENST00000390419 | EPHB6 | KEL | PRSS3P1 | TRBV30 | TRPV6 | U66060.1-19 | U66060.1-23 | U66061.1-11 | unnamed		ACP vs. alcoholic controls	1.21418	1.12-1.3	5.30862	1.16863	1.05-1.3	2.21848	1.29316	1.16-1.4	5.40699
rs3114477	7	142503071	C	A	0.4715	0	0.983	rs762691	0.919467	FALSE	TRBC2 (2.6 kb, near_gene/Downstream gene/MODIFIER); TRBV30 (7.2 kb); TRBJ2-7 (7.9 kb); TRBJ2-6 (8.1 kb); TRBJ2-5 (8.2 kb); TRBJ2-4 (8.3 kb); TRBJ2-3 (8.5 kb); TRBJ2-2P (8.6 kb); TRBJ2-2 (8.8 kb); TRBJ2-1 (9 kb); WBP1LP1 (16 kb); PRSS3P2 (21 kb); PRSS3P1 (31 kb); PRSS1 (42 kb); EPHB6 (50 kb)	-0.0924708	-0.0289299	0.577	0.567488	NA	C7orf34 | C7ORF34 | ENST00000390392 | ENST00000390401 | ENST00000390418 | ENST00000390419 | EPHB6 | KEL | PRSS3P1 | PRSS3P2 | TRBV28 | TRBV30 | TRPV6 | U66060.1-19 | U66060.1-23 | U66061.1-11 | unnamed		ACP vs. alcoholic controls	1.21403	1.12-1.3	5.3027	1.16959	1.05-1.3	2.2376	1.29467	1.16-1.4	5.46902
rs3134905	7	142503362	T	A	0.4703	0	0.988	rs762691	0.921731	FALSE	TRBC2 (2.9 kb, near_gene/Downstream gene/MODIFIER); TRBV30 (6.9 kb); TRBJ2-7 (8.2 kb); TRBJ2-6 (8.4 kb); TRBJ2-5 (8.5 kb); TRBJ2-4 (8.6 kb); TRBJ2-3 (8.8 kb); TRBJ2-2P (8.9 kb); TRBJ2-2 (9.1 kb); TRBJ2-1 (9.3 kb); WBP1LP1 (16 kb); PRSS3P2 (21 kb); PRSS3P1 (32 kb); PRSS1 (42 kb); EPHB6 (49 kb)	-0.141142	-0.157145	2.057	0.351879	NA	C7orf34 | C7ORF34 | ENST00000390392 | ENST00000390401 | ENST00000390418 | ENST00000390419 | EPHB6 | KEL | PRSS3P1 | TRBV30 | TRPV6 | U66060.1-19 | U66060.1-23 | U66061.1-11 | unnamed		ACP vs. alcoholic controls	1.21344	1.12-1.3	5.30261	1.16768	1.05-1.3	2.20617	1.29232	1.16-1.4	5.40072
rs74376508	3	193661075	C	T	0.1079	0	0.729	rs74376508	1	TRUE	HES1 (190 kb); OPA1 (250 kb)	1.03556		10.24	0.607095	NA			ACP vs. all controls	1.41764	1.23-1.6	5.29689	1.55569	1.27-1.9	4.38047	1.33032	1.1-1.6	2.34221
rs2187882	23	86570756	A	T	0.1355	0	0.863	rs2138717	0.997187	FALSE						NA		CCL20	ACP vs. all controls	1.59624	1.32-1.9	5.2919	2.00117	1.49-2.7	4.86299	1.57864	1.25-2	3.55953
chr10:120837903:D	10	120837903	A	AT	0.3443	0	0.922	chr10:120837903:D	1	TRUE	EIF3A (0 kb, intron/Intron/MODIFIER); SNORA19 (18 kb); FAM45A (26 kb); NANOS1 (44 kb)			8.736		NA	BAG3 | C10orf84 | EIF3A | FAM45A | FAM45B | INPP5F | NANOS1 | PRDX3 | RP11-435O11.2 | SFXN4 | SNORA19 | unnamed	ZMIZ1	ACP vs. all controls	1.23426	1.14-1.4	5.28465	1.23442	1.1-1.4	3.18106	1.2566	1.12-1.4	3.78748
rs12264824	10	120835776	T	C	0.3761	0	0.979	rs10787903	0.868919	FALSE	EIF3A (0 kb, intron/Intron/MODIFIER); SNORA19 (16 kb); FAM45A (28 kb); NANOS1 (42 kb)			5.244	0.596042	NA	BAG3 | C10orf84 | EIF3A | FAM45A | FAM45B | GRK5 | INPP5F | NANOS1 | PRDX3 | RP11-435O11.2 | SFXN4 | SNORA19 | unnamed	ZMIZ1	ACP vs. all controls	1.22175	1.12-1.3	5.28208	1.23016	1.1-1.4	3.34176	1.23747	1.11-1.4	3.64551
rs6564219	16	75222006	C	G	0.2048	0	0.859	rs6564219	1	TRUE	RP11-331F4.1 (4.4 kb, near_gene/Downstream gene/MODIFIER); ZFP1 (16 kb); CTRB2 (16 kb); CTRB1 (31 kb); BCAR1 (41 kb)	-1.12031	-0.326939	0.016	0.219881	NA	BCAR1 | CFDP1 | CTRB1 | CTRB2 | TMEM170A | ZFP1 | ZNRF1		ACP vs. all controls	1.30582	1.18-1.4	5.28041	1.37608	1.19-1.6	4.47897	1.23213	1.06-1.4	2.20736
rs3134906	7	142505154	A	G	0.47	2	1	rs762691	0.919663	FALSE	TRBC2 (4.7 kb, near_gene/Downstream gene/MODIFIER); TRBV30 (5.1 kb); TRBJ2-7 (10 kb); TRBJ2-6 (10 kb); TRBJ2-5 (10 kb); TRBJ2-4 (10 kb); TRBJ2-3 (11 kb); TRBJ2-2P (11 kb); TRBJ2-2 (11 kb); TRBJ2-1 (11 kb); WBP1LP1 (18 kb); PRSS3P2 (23 kb); PRSS3P1 (33 kb); PRSS1 (44 kb); EPHB6 (48 kb)	-0.405461	0.0553603	1.289	0.357558	NA	C7orf34 | C7ORF34 | ENST00000390392 | ENST00000390401 | ENST00000390418 | ENST00000390419 | EPHB6 | KEL | PRSS3P1 | PRSS3P2 | TRBV28 | TRBV30 | TRPV6 | U66060.1-19 | U66060.1-23 | U66061.1-11 | unnamed		ACP vs. alcoholic controls	1.21168	1.12-1.3	5.27869	1.16577	1.05-1.3	2.18823	1.28899	1.16-1.4	5.35758
rs67648919	3	126750996	C	T	0.1346	0	0.919	chr3:126728393:I	0.833802	FALSE	PLXNA1 (0 kb, intron/Intron/MODIFIER | nc-RNA/Non coding transcript/MODIFIER | near_gene/Downstream gene/MODIFIER); CHCHD6 (72 kb); C3orf56 (160 kb)	-0.307423	0.949079	0.783	0.506175	NA	CHCHD6 | CHST13 | MGLL | PLXNA1		ACP vs. all controls	1.3656	1.2-1.55	5.27694	1.4709	1.24-1.74	4.72326	1.3641	1.15-1.61	3.33033
rs4355941	23	105874790	T	G	0.4307	0	0.808	rs4355941	1	TRUE	CXorf57 (0 kb, intron/NMD transcript/MODIFIER | intron/Intron/MODIFIER)					0.468 Pancreatitis		CDIPT	ACP vs. Non-alcoholic controls	1.41515	1.23-1.63	5.2755	1.7025	1.38-2.09	5.74666	1.40683	1.18-1.67	3.70801
rs56784185	7	142375468	A	G	0.0919	0	0.927	rs62470035	0.89822	FALSE	MTRNR2L6 (0 kb, 3'utr/3 prime UTR/MODIFIER); TRBV25-1 (3.1 kb, near_gene/Upstream gene/MODIFIER); TRBV24-1 (11 kb); TRBVA (14 kb); TRBV23-1 (22 kb); TRBV22-1 (26 kb); TRBV26 (28 kb); TRBV21-1 (31 kb); TRBV20-1 (41 kb); TRBVB (44 kb); TRBV27 (48 kb); TRBV19 (48 kb)	-0.169334	-0.162177	11.8	0.471974	NA	ENST00000390388 | ENST00000390397 | EPHB6 | TRBV19 | U66060.1-19 | U66060.1-23 | U66061.1-11 | unnamed		ACP vs. all controls	1.4573	1.25-1.7	5.27382	1.4894	1.22-1.82	3.70664	1.416	1.16-1.72	3.06745
rs3169330	16	75269267	G	A	0.1693	0	0.936	rs9928842	0.87856	FALSE	BCAR1 (0 kb, 3'utr/3 prime UTR/MODIFIER | exon/Synonymous/LOW | nc-exon/Non coding transcript exon/MODIFIER | intron/NMD transcript/MODIFIER | nc-RNA/Non coding transcript/MODIFIER | near_gene/Downstream gene/MODIFIER); CTRB1 (10 kb); CTRB2 (28 kb); CFDP1 (58 kb)	0.735971	7.09276	0.002	0.199943	NA	BCAR1 | CFDP1 | CHST6 | CTRB1 | CTRB2 | MLKL | RFWD3 | RP11-252A24.2 | RP11-252K23.2 | TMEM170A | ZFP1 | ZNRF1	APLP2 | FABP5 | TCFL5	ACP vs. all controls	1.31822	1.18-1.5	5.27347	1.36295	1.18-1.6	3.99378	1.21448	1.05-1.4	1.88548
rs530409	10	120808474	T	C	0.3754	0	0.979	rs10787903	0.868729	FALSE	EIF3A (0 kb, intron/Intron/MODIFIER); SNORA19 (11 kb); NANOS1 (15 kb); FAM45A (55 kb)			2.146	0.581405	NA	BAG3 | C10orf84 | EIF3A | FAM45A | FAM45B | GRK5 | INPP5F | NANOS1 | PRDX3 | RP11-435O11.2 | SFXN4 | SNORA19 | unnamed	ZMIZ1	ACP vs. all controls	1.22145	1.12-1.3	5.2706	1.23579	1.11-1.4	3.46896	1.23092	1.1-1.4	3.49051
rs7918493	10	120848761	C	A	0.3781	0	0.988	rs10787903	0.855881	FALSE	EIF3A (8.4 kb); FAM45A (15 kb); SNORA19 (29 kb); SFXN4 (52 kb)			0.448	0.264167	NA	BAG3 | C10orf84 | EIF3A | FAM45A | FAM45B | GRK5 | INPP5F | NANOS1 | PRDX3 | RP11-435O11.2 | SFXN4 | SNORA19 | unnamed	ZMIZ1	ACP vs. all controls	1.22085	1.12-1.3	5.2703	1.22699	1.1-1.4	3.29097	1.24595	1.12-1.4	3.87423
chr10:120837900:D	10	120837900	T	TA	0.3761	0	0.975	rs10787903	0.871726	FALSE	EIF3A (0 kb); SNORA19 (18 kb); FAM45A (26 kb); NANOS1 (44 kb)			11.51		NA	BAG3 | C10orf84 | EIF3A | FAM45A | FAM45B | GRK5 | INPP5F | NANOS1 | PRDX3 | RP11-435O11.2 | SFXN4 | SNORA19 | unnamed	ZMIZ1	ACP vs. all controls	1.2219	1.12-1.3	5.26519	1.23183	1.1-1.4	3.36895	1.23426	1.11-1.4	3.55825
rs608790	10	120806163	C	T	0.3742	0	0.978	rs10787903	0.865741	FALSE	EIF3A (0 kb, intron/Intron/MODIFIER); NANOS1 (12 kb); SNORA19 (13 kb); FAM45A (57 kb)			0.097	0.331883	NA	BAG3 | C10orf84 | EIF3A | FAM45A | FAM45B | GRK5 | INPP5F | NANOS1 | PRDX3 | RP11-435O11.2 | SFXN4 | SNORA19 | unnamed	ZMIZ1	ACP vs. all controls	1.2213	1.12-1.3	5.26487	1.23503	1.11-1.4	3.45159	1.22805	1.1-1.4	3.42339
rs11810329	1	16108922	G	A	0.1732	0	0.967	rs10803398	0.960757	FALSE	FBLIM1 (0 kb, intron/Intron/MODIFIER | nc-RNA/Non coding transcript/MODIFIER); TMEM82 (34 kb); SLC25A34 (41 kb); PLEKHM2 (48 kb)	-0.343879	-0.215121	2.822	0.788401	NA	AGMAT | CLCNKA | DNAJC16 | FBLIM1 | PLEKHM2 | RP11-169K16.4 | SLC25A34 | SPEN | TMEM82		ACP vs. all controls	1.28337	1.16-1.4	5.26316	1.16645	1.02-1.3	1.44014	1.353	1.18-1.6	4.35788
rs1862738	16	75285164	C	A	0.1797	0	0.938	rs9928842	0.878666	FALSE	BCAR1 (0 kb, intron/NMD transcript/MODIFIER | intron/Intron/MODIFIER | near_gene/Upstream gene/MODIFIER); CTRB1 (26 kb); CFDP1 (42 kb); CTRB2 (44 kb)	1.30476	5.21637	6.238	0.666286	NA	BCAR1 | CFDP1 | CHST6 | CTRB1 | CTRB2 | RP11-252K23.2 | TMEM170A | ZFP1 | ZNRF1	TCFL5	ACP vs. all controls	1.30702	1.18-1.4	5.26173	1.37779	1.19-1.6	4.44507	1.20351	1.04-1.4	1.81554
rs11198754	10	120832181	A	G	0.3757	0	0.978	rs10787903	0.870692	FALSE	EIF3A (0 kb, intron/Intron/MODIFIER); SNORA19 (13 kb); FAM45A (31 kb); NANOS1 (38 kb)			0.797	0.627076	NA	BAG3 | C10orf84 | EIF3A | FAM45A | FAM45B | GRK5 | INPP5F | NANOS1 | PRDX3 | RP11-435O11.2 | SFXN4 | SNORA19 | unnamed	ZMIZ1	ACP vs. all controls	1.22115	1.12-1.3	5.25914	1.23168	1.1-1.4	3.37584	1.2332	1.11-1.4	3.54409
chrX:106507551:D	23	106507551	TA	T	0.1207	0	0.721	chrX:106507551:D	1	TRUE						NA			ACP vs. all controls	1.81818	1.43-2.32	5.2576	2.09873	1.5-2.94	4.39138	1.74478	1.3-2.35	3.39453
rs2420495	10	120894016	C	T	0.4176	0	0.964	rs2420495	1	TRUE	FAM45A (0 kb, nc-exon/Non coding transcript exon/MODIFIER | intron/Intron/MODIFIER | nc-RNA/Non coding transcript/MODIFIER | near_gene/Downstream gene/MODIFIER | near_gene/Upstream gene/MODIFIER); SFXN4 (6.3 kb); PRDX3 (33 kb); EIF3A (54 kb)			1.362	0.489246	NA	BAG3 | C10orf84 | EIF3A | FAM45A | FAM45B | INPP5F | NANOS1 | PRDX3 | RP11-435O11.2 | SFXN4 | SNORA19 | unnamed		ACP vs. all controls	1.2197	1.12-1.32	5.24852	1.2188	1.09-1.36	3.11888	1.2208	1.1-1.36	3.30692
rs7777677	7	142371448	T	C	0.3095	0	0.98	rs7777677	1	TRUE	MTRNR2L6 (2.7 kb, near_gene/Upstream gene/MODIFIER); TRBV24-1 (6.7 kb); TRBV25-1 (7.1 kb); TRBV23-1 (17 kb); TRBVA (18 kb); TRBV22-1 (22 kb); TRBV21-1 (27 kb); TRBV26 (32 kb); TRBV20-1 (37 kb); TRBV19 (44 kb); TRBVB (48 kb)	-0.409055	-0.229875	4.255	0.248759	NA	ENST00000390388 | ENST00000390397 | EPHB6 | OR9A2 | PGBD4P1 | PRSS1 | RP5-894A10.2 | TRBV19 | TRBV21-1 | TRBV24-1 | TRBV25-1 | TRBV27 | TRBV28 | TRBV29-1 | TRBV7-8 | U66060.1-19 | U66060.1-21 | U66060.1-23 | U66061.1-11 | unnamed		ACP vs. all controls	1.22971	1.14-1.3	5.24844	1.18723	1.06-1.3	2.30396	1.28518	1.15-1.4	4.46206
rs7796160	7	142371453	C	A	0.3095	0	0.98	rs7777677	1	FALSE	MTRNR2L6 (2.7 kb, near_gene/Upstream gene/MODIFIER); TRBV24-1 (6.7 kb); TRBV25-1 (7.1 kb); TRBV23-1 (17 kb); TRBVA (18 kb); TRBV22-1 (22 kb); TRBV21-1 (27 kb); TRBV26 (32 kb); TRBV20-1 (37 kb); TRBV19 (44 kb); TRBVB (48 kb)	-0.86519	-0.287469	0.136	0.288347	NA	ENST00000390388 | ENST00000390397 | EPHB6 | OR9A2 | PGBD4P1 | PRSS1 | RP5-894A10.2 | TRBV19 | TRBV21-1 | TRBV24-1 | TRBV25-1 | TRBV27 | TRBV28 | TRBV29-1 | TRBV7-8 | U66060.1-19 | U66060.1-21 | U66060.1-23 | U66061.1-11 | unnamed		ACP vs. all controls	1.22971	1.14-1.3	5.24844	1.18723	1.06-1.3	2.30396	1.28518	1.15-1.4	4.46206
chr10:120791778:D	10	120791778	T	TAAATACC	0.3745	0	0.973	rs10787903	0.849759	FALSE	NANOS1 (0 kb, 3'utr/3 prime UTR/MODIFIER | near_gene/Downstream gene/MODIFIER); EIF3A (2.6 kb, near_gene/Downstream gene/MODIFIER); SNORA19 (28 kb); FAM45A (72 kb)			7.449		NA	BAG3 | C10orf84 | EIF3A | FAM45A | FAM45B | GRK5 | INPP5F | NANOS1 | PRDX3 | RP11-435O11.2 | SFXN4 | SNORA19 | unnamed	ZMIZ1	ACP vs. all controls	1.22205	1.12-1.3	5.24842	1.23808	1.11-1.4	3.48918	1.22745	1.1-1.4	3.37805
rs73413827	9	14196764	C	A	0.1265	0	0.987	chr9:14197788:I	0.949318	FALSE	NFIB (0 kb, intron/Intron/MODIFIER); RPL3P11 (150 kb); PES1P2 (210 kb)	-0.142975	-0.16727	0.996	0.693305	0.915 Metastasis at diagnosis in osteosarcoma	NFIB	C13ORF15 | CTSC	ACP vs. all controls	1.32345	1.18-1.5	5.24479	1.16713	1-1.4	1.20726	1.39237	1.19-1.6	4.0148
rs4737	16	75238103	T	C	0.1746	0	0.94	rs9928842	0.902938	FALSE	CTRB2 (0 kb, exon/Missense/MODERATE | 3'utr/3 prime UTR/MODIFIER | nc-exon/Non coding transcript exon/MODIFIER | nc-RNA/Non coding transcript/MODIFIER | near_gene/Downstream gene/MODIFIER); CTRB1 (15 kb); BCAR1 (25 kb); ZFP1 (32 kb)	-0.96346	-0.829253	12.48	0.152493	NA	ADAT1 | BCAR1 | CFDP1 | CHST6 | CTRB1 | CTRB2 | GLG1 | MLKL | RFWD3 | RP11-252A24.7 | RP11-252K23.2 | TMEM170A | ZFP1 | ZNRF1	APLP2 | FABP5 | PDPR | TCFL5	ACP vs. all controls	1.31079	1.18-1.5	5.24475	1.40984	1.22-1.6	4.95186	1.21521	1.05-1.4	1.92364
rs10886377	10	120828295	C	G	0.3755	0	0.979	rs10787903	0.87089	FALSE	EIF3A (0 kb, intron/Intron/MODIFIER); SNORA19 (8.6 kb); NANOS1 (34 kb); FAM45A (35 kb)			0.146	0.359731	NA	BAG3 | C10orf84 | EIF3A | FAM45A | FAM45B | GRK5 | INPP5F | NANOS1 | PRDX3 | RP11-435O11.2 | SFXN4 | SNORA19 | unnamed	ZMIZ1	ACP vs. all controls	1.2207	1.12-1.3	5.24198	1.23153	1.1-1.4	3.37242	1.23122	1.1-1.4	3.49763
rs4601821	11	113250346	A	G	0.342	0	0.991	rs4601821	1	TRUE	TTC12 (0 kb, intron/Intron/MODIFIER); ANKK1 (8.2 kb); DRD2 (30 kb); MIR4301 (70 kb)			0.866	0.55618	0.268 Information processing speed // 0.237 Select biomarker traits	ANKK1 | C11orf71 | DRD2 | RP11-159N11.4 | TMPRSS5 | TTC12		ACP vs. all controls	1.223	1.13-1.33	5.24001	1.2087	1.08-1.35	2.86522	1.1754	1.05-1.31	2.26755
rs6564221	16	75224971	T	C	0.1804	0	0.944	rs6564219	0.898884	FALSE	RP11-331F4.1 (1.4 kb, near_gene/Downstream gene/MODIFIER); CTRB2 (13 kb); ZFP1 (19 kb); CTRB1 (28 kb); BCAR1 (38 kb)	-0.373832	-0.221107	2.443	0.464961	NA	BCAR1 | CFDP1 | CHST6 | CTRB1 | CTRB2 | GLG1 | MLKL | RFWD3 | RP11-252A24.7 | TMEM170A | ZFP1 | ZNRF1	PDPR | TCFL5	ACP vs. all controls	1.30617	1.18-1.4	5.23888	1.40825	1.22-1.6	4.98254	1.19531	1.03-1.4	1.69902
chr10:120785227:D	10	120785227	GGCCCCACT	G	0.3934	0	0.992	rs10787903	0.857747	FALSE	NANOS1 (4 kb); EIF3A (9.1 kb); SNORA19 (34 kb); FAM45A (78 kb)			3.138		NA	BAG3 | C10orf84 | EIF3A | FAM45A | FAM45B | GRK5 | INPP5F | NANOS1 | PRDX3 | RP11-435O11.2 | SFXN4 | SNORA19 | unnamed	ZMIZ1	ACP vs. all controls	1.2165	1.12-1.32	5.23792	1.2328	1.11-1.37	3.48621	1.2363	1.11-1.38	3.69762
rs10226604	7	142345172	C	T	0.0925	0	0.934	rs62470035	0.911133	FALSE	TRBV21-1 (0.28 kb, near_gene/Downstream gene/MODIFIER); TRBV22-1 (4.1 kb, near_gene/Upstream gene/MODIFIER); TRBV23-1 (8.3 kb); TRBV20-1 (10 kb); TRBV19 (18 kb); TRBV24-1 (19 kb); TRBV25-1 (33 kb); TRBVA (44 kb)	-0.321207	-0.208679	3.073	0.210671	NA	AC093673.5 | CASP2 | ENST00000390388 | ENST00000390397 | EPHB6 | GSTK1 | KEL | PGBD4P1 | RP5-894A10.2 | TRBV19 | TRBV21-1 | TRBV24-1 | TRBV28 | U66060.1-19 | U66060.1-23 | U66061.1-11 | unnamed | ZYX		ACP vs. all controls	1.4517	1.25-1.69	5.23774	1.4654	1.2-1.78	3.51535	1.405	1.16-1.71	2.9769
rs55792275	3	126729263	C	T	0.1416	0	0.954	chr3:126728393:I	0.858756	FALSE	PLXNA1 (0 kb, intron/Intron/MODIFIER); CHCHD6 (50 kb); C3orf56 (180 kb); RCC2P4 (240 kb)	0.134725	1.08748	4.42	0.790977	NA	CHCHD6 | CHST13 | MGLL | PLXNA1		ACP vs. all controls	1.3449	1.19-1.52	5.23638	1.4466	1.23-1.7	4.76526	1.3461	1.15-1.58	3.3688
rs186808650	10	120789263	C	G	0.2999	0	0.769	rs186808650	1	TRUE	NANOS1 (0 kb, 5'utr/5 prime UTR/MODIFIER | near_gene/Upstream gene/MODIFIER); EIF3A (5.1 kb); SNORA19 (30 kb); FAM45A (74 kb)			1.003	0.710252	NA	BAG3 | C10orf84 | EIF3A | FAM45A | FAM45B | INPP5F | NANOS1 | PRDX3 | RP11-435O11.2 | SFXN4 | SNORA19 | unnamed		ACP vs. all controls	1.2647	1.15-1.4	5.23599	1.21996	1.08-1.4	2.36615	1.27162	1.12-1.4	3.35554
rs4726549	7	142370604	A	G	0.3035	0	0.973	rs7777677	0.94868	FALSE	MTRNR2L6 (3.5 kb, near_gene/Upstream gene/MODIFIER); TRBV24-1 (5.9 kb); TRBV25-1 (8 kb); TRBV23-1 (17 kb); TRBVA (19 kb); TRBV22-1 (21 kb); TRBV21-1 (26 kb); TRBV26 (33 kb); TRBV20-1 (36 kb); TRBV19 (44 kb); TRBVB (49 kb)	-0.401581	-0.225565	2.78	0.384424	NA	ENST00000390388 | ENST00000390397 | EPHB6 | OR9A2 | PGBD4P1 | PRSS1 | RP5-894A10.2 | TRBV19 | TRBV21-1 | TRBV24-1 | TRBV25-1 | TRBV27 | TRBV28 | TRBV29-1 | TRBV7-8 | U66060.1-19 | U66060.1-21 | U66060.1-23 | U66061.1-11 | unnamed		ACP vs. all controls	1.22986	1.14-1.3	5.23231	1.18217	1.05-1.3	2.19831	1.28074	1.14-1.4	4.32838
rs2901172	10	120851588	C	T	0.4001	0	0.986	rs10787903	0.883253	FALSE	EIF3A (11 kb); FAM45A (12 kb); SNORA19 (32 kb); SFXN4 (49 kb)			4.187	0.586226	NA	BAG3 | C10orf84 | EIF3A | FAM45A | FAM45B | GRK5 | INPP5F | NANOS1 | PRDX3 | RP11-435O11.2 | SFXN4 | SNORA19 | unnamed	ZMIZ1	ACP vs. all controls	1.2169	1.12-1.32	5.23072	1.2109	1.09-1.35	2.98328	1.2489	1.12-1.39	4.00964
rs74054849	1	16069928	A	G	0.0816	0	0.956	rs74054849	1	TRUE	RP11-169K16.4 (0 kb, intron/Intron/MODIFIER | nc-RNA/Non coding transcript/MODIFIER); TMEM82 (0 kb, intron/Intron/MODIFIER | nc-RNA/Non coding transcript/MODIFIER); SLC25A34 (2 kb, near_gene/Downstream gene/MODIFIER); PLEKHM2 (8.7 kb); FBLIM1 (13 kb)	0.278174	1.00172	5.65	0.8825	NA	AGMAT | CASP9 | CROCCP3 | CTRC | DDI2 | DNAJC16 | PLEKHM2 | RP11-169K16.4 | RP11-288I21.1 | RSC1A1 | SLC25A34 | unnamed	CD97	ACP vs. all controls	1.39509	1.22-1.6	5.22684	1.35888	1.12-1.6	2.64008	1.36631	1.14-1.6	2.86501
rs73196554	3	126731506	G	A	0.1412	0	0.956	chr3:126728393:I	0.859436	FALSE	PLXNA1 (0 kb, intron/Intron/MODIFIER); CHCHD6 (52 kb); C3orf56 (180 kb); RCC2P4 (250 kb)	0.101245	0.714449	4.342	0.752022	NA	CHCHD6 | CHST13 | MGLL | PLXNA1		ACP vs. all controls	1.3443	1.19-1.52	5.22235	1.4459	1.23-1.7	4.75423	1.3398	1.14-1.57	3.2646
rs57271377	3	126729689	C	T	0.1418	0	0.954	chr3:126728393:I	0.859387	FALSE	PLXNA1 (0 kb, intron/Intron/MODIFIER); CHCHD6 (50 kb); C3orf56 (180 kb); RCC2P4 (240 kb)	0.0946333	1.09662	5.331	0.838666	NA	CHCHD6 | CHST13 | MGLL | PLXNA1		ACP vs. all controls	1.3435	1.19-1.52	5.2187	1.4472	1.23-1.7	4.78512	1.3464	1.15-1.58	3.37313
rs10277702	7	142099013	T	C	0.1729	2	1	rs762688	0.946994	FALSE	TRBV7-8 (0.44 kb); TRBV6-9 (5.1 kb); TRBV5-7 (12 kb); TRBV7-7 (21 kb); TRBV6-8 (25 kb); TRBV5-6 (32 kb); TRBV7-6 (40 kb); TRBV6-7 (45 kb); TRBV5-5 (50 kb)	-0.470381	-0.238512	0.488	0.682864	0.675 Capecitabine sensitivity	ENST00000390388 | TRBV7-4 | U66060.1-19 | unnamed	ADAD2 | CACNA1F | OR2H1 | PALLD	ACP vs. all controls	1.27616	1.15-1.4	5.2137	1.25707	1.1-1.4	2.79633	1.29904	1.14-1.5	3.58824
rs73249839	23	106537752	T	C	0.0472	0	0.529	rs73249839	1	TRUE						NA			ACP vs. all controls	2.45135	1.69-3.6	5.21148	2.91806	1.61-5.3	3.0476	2.44905	1.54-3.8	3.52844
rs5916754	23	105455775	T	C	0.0934	0	0.6	rs73247912	0.841352	FALSE	MUM1L1 (2.8 kb, near_gene/Downstream gene/MODIFIER)					0.263 Pancreatitis		CDIPT | PDGFD	ACP vs. Non-alcoholic controls	1.92183	1.47-2.51	5.21084	3.01439	1.96-4.65	5.662	1.53264	1.11-2.12	1.88673
rs10738355	9	14197498	A	G	0.1277	0	0.984	chr9:14197788:I	0.9753	FALSE	NFIB (0 kb, intron/Intron/MODIFIER); RPL3P11 (160 kb); PES1P2 (210 kb)	1.10692	0.269703	12.31	0.61605	0.925 Metastasis at diagnosis in osteosarcoma	NFIB	C13ORF15 | CTSC	ACP vs. all controls	1.3207	1.18-1.48	5.2074	1.1649	1-1.36	1.18929	1.383	1.18-1.62	3.88999
chrX:86576404:I	23	86576404	AT	A	0.1369	0	0.858	rs2138717	0.990445	FALSE						NA		CCL20	ACP vs. all controls	1.5878	1.32-1.9	5.2047	1.99046	1.47-2.7	4.81913	1.58341	1.25-2	3.61046
rs79280654	1	15737142	A	G	0.0503	0	0.826	rs79280654	1	TRUE	EFHD2 (0 kb, intron/Intron/MODIFIER); RP3-467K16.4 (1.2 kb, near_gene/Upstream gene/MODIFIER); FHAD1 (10 kb); CTRC (28 kb); CELA2A (46 kb)	1.19586	4.31649	8.307	0.733961	NA	CTRC | RP11-276H7.3 | RP3-467K16.4 | TMEM51		ACP vs. all controls	1.5674	1.3-1.9	5.20446	1.48655	1.15-1.9	2.43952	1.61577	1.23-2.1	3.19159
rs6589375	11	113255111	C	A	0.3405	0	0.995	rs4601821	0.985896	FALSE	TTC12 (0.84 kb, near_gene/Downstream gene/MODIFIER); ANKK1 (3.4 kb, near_gene/Upstream gene/MODIFIER); DRD2 (25 kb); MIR4301 (66 kb)			1.844	0.224338	0.267 Information processing speed // 0.241 Select biomarker traits	ANKK1 | C11orf71 | DRD2 | RP11-159N11.4 | TMPRSS5 | TTC12		ACP vs. all controls	1.222	1.13-1.33	5.20216	1.2067	1.08-1.35	2.8232	1.1665	1.05-1.3	2.10198
rs150350251	7	135514822	T	C	0.0105	0	0.811	rs150350251	1	TRUE	FAM180A (81 kb); MTPN (97 kb); LUZP6 (97 kb); SLC13A4 (100 kb)	-0.592529	-0.254265	0.197	0.346215	NA		CD4	ACP vs. all controls	2.51636	1.72-3.7	5.20013	2.21484	1.3-3.8	2.21089	1.93424	1.16-3.2	1.82729
rs361366	7	142099988	G	A	0.1704	0	0.98	rs762688	0.956883	FALSE	TRBV7-8 (0.01 kb); TRBV6-9 (4.1 kb); TRBV5-7 (11 kb); TRBV7-7 (20 kb); TRBV6-8 (24 kb); TRBV5-6 (31 kb); TRBV7-6 (39 kb); TRBV6-7 (44 kb); TRBV5-5 (49 kb)	-0.197594	-0.19624	4.418	0.772865	0.675 Capecitabine sensitivity	ENST00000390388 | U66060.1-19 | unnamed	ADAD2 | CACNA1F | OR2H1 | PALLD	ACP vs. all controls	1.28057	1.16-1.4	5.19943	1.25849	1.1-1.4	2.73881	1.28584	1.12-1.5	3.2775
rs113096360	1	16113757	A	G	0.1747	0	0.953	rs10803398	0.95567	FALSE	FBLIM1 (0.67 kb, near_gene/Downstream gene/MODIFIER); TMEM82 (39 kb); SLC25A34 (46 kb); PLEKHM2 (52 kb)	-0.0866613	0.751209	2.838	0.643915	NA	AGMAT | CLCNKA | DNAJC16 | FBLIM1 | PLEKHM2 | RP11-169K16.4 | SLC25A34 | SPEN | TMEM82		ACP vs. all controls	1.28238	1.16-1.4	5.19848	1.16577	1.02-1.3	1.42535	1.35814	1.18-1.6	4.41078
rs6564222	16	75225044	G	A	0.1801	0	0.945	rs6564219	0.899584	FALSE	RP11-331F4.1 (1.3 kb, near_gene/Downstream gene/MODIFIER); CTRB2 (13 kb); ZFP1 (19 kb); CTRB1 (28 kb); BCAR1 (38 kb)	-1.17644	-0.333288	0.021	0.194599	NA	BCAR1 | CFDP1 | CHST6 | CTRB1 | CTRB2 | TMEM170A | ZFP1 | ZNRF1	TCFL5	ACP vs. all controls	1.30463	1.18-1.4	5.19792	1.41024	1.22-1.6	5.01899	1.1946	1.03-1.4	1.68639
rs936537	11	134864596	C	G	0.136	0	0.94	rs55971108	0.95494	FALSE				0.028	0.194226	NA	AP005135.2 | RP11-555G19.1	PHYHD1	ACP vs. Non-alcoholic controls	1.32275	1.18-1.5	5.19539	1.49254	1.27-1.8	5.49394	1.20715	1.03-1.4	1.69125
rs7088698	10	120852626	A	T	0.4004	0	0.985	rs10787903	0.883909	FALSE	FAM45A (11 kb); EIF3A (12 kb); SNORA19 (33 kb); SFXN4 (48 kb)			2.176	0.513044	NA	BAG3 | C10orf46 | C10orf84 | CACUL1 | EIF3A | FAM45A | FAM45B | GRK5 | INPP5F | NANOS1 | PRDX3 | RP11-435O11.2 | SFXN4 | SNORA19 | unnamed	ZMIZ1	ACP vs. all controls	1.2158	1.12-1.32	5.1879	1.2104	1.09-1.35	2.97239	1.2488	1.12-1.39	4.00713
chr16:75268060:D	16	75268060	C	CAG	0.2296	0	0.783	chr16:75268060:D	1	TRUE	BCAR1 (0 kb, intron/NMD transcript/MODIFIER | intron/Intron/MODIFIER | nc-RNA/Non coding transcript/MODIFIER | near_gene/Downstream gene/MODIFIER); CTRB1 (9.2 kb); CTRB2 (27 kb); CFDP1 (60 kb)			7.696		NA	BCAR1 | CFDP1 | CTRB1 | CTRB2 | RP11-252K23.2 | TMEM170A		ACP vs. all controls	1.30107	1.16-1.4	5.18583	1.30548	1.14-1.5	3.27659	1.2566	1.09-1.4	2.59027
rs4479268	16	75224733	C	A	0.1799	0	0.944	rs6564219	0.899537	FALSE	RP11-331F4.1 (1.6 kb, near_gene/Downstream gene/MODIFIER); CTRB2 (13 kb); ZFP1 (19 kb); CTRB1 (28 kb); BCAR1 (38 kb)	-0.644285	-0.259195	0.584	0.366726	NA	BCAR1 | CFDP1 | CHST6 | CTRB1 | CTRB2 | GLG1 | MLKL | RFWD3 | RP11-252A24.7 | TMEM170A | ZFP1 | ZNRF1	PDPR | TCFL5	ACP vs. all controls	1.30412	1.16-1.4	5.18432	1.40865	1.22-1.6	4.98981	1.19474	1.03-1.4	1.68818
rs10277675	7	142099069	A	C	0.1697	0	0.985	rs762688	0.958082	FALSE	TRBV7-8 (0.39 kb, near_gene/Downstream gene/MODIFIER); TRBV6-9 (5.1 kb); TRBV5-7 (12 kb); TRBV7-7 (21 kb); TRBV6-8 (25 kb); TRBV5-6 (32 kb); TRBV7-6 (40 kb); TRBV6-7 (45 kb); TRBV5-5 (50 kb)	-0.120219	-0.188348	7.623	0.820303	0.675 Capecitabine sensitivity	ENST00000390388 | U66060.1-19 | unnamed	ADAD2 | CACNA1F | OR2H1 | PALLD	ACP vs. all controls	1.27992	1.16-1.4	5.18028	1.25976	1.1-1.4	2.76561	1.28469	1.12-1.5	3.26548
rs12772354	10	120894433	T	C	0.4132	0	0.971	rs2420495	0.988666	FALSE	FAM45A (0 kb, nc-exon/Non coding transcript exon/MODIFIER | intron/Intron/MODIFIER | nc-RNA/Non coding transcript/MODIFIER | near_gene/Upstream gene/MODIFIER); SFXN4 (5.8 kb); PRDX3 (33 kb); EIF3A (54 kb)			2.457	0.665807	NA	BAG3 | C10orf84 | EIF3A | FAM45A | FAM45B | INPP5F | NANOS1 | PRDX3 | RP11-435O11.2 | SFXN4 | SNORA19 | unnamed		ACP vs. all controls	1.2173	1.12-1.32	5.17851	1.2181	1.09-1.36	3.113	1.2175	1.09-1.36	3.24069
rs3897584	11	113249725	G	C	0.3423	0	0.991	rs4601821	0.998489	FALSE	TTC12 (0 kb, intron/Intron/MODIFIER); ANKK1 (8.8 kb); DRD2 (31 kb); MIR4301 (71 kb)			0.124	0.552666	0.267 Information processing speed // 0.242 Select biomarker traits	ANKK1 | C11orf71 | DRD2 | RP11-159N11.4 | TMPRSS5 | TTC12		ACP vs. all controls	1.2213	1.13-1.33	5.17573	1.2069	1.08-1.35	2.82739	1.1737	1.05-1.31	2.23433
rs6564220	16	75224194	C	T	0.1769	0	0.915	chr16:75232655:D	0.807081	FALSE	RP11-331F4.1 (2.2 kb, near_gene/Downstream gene/MODIFIER); CTRB2 (14 kb); ZFP1 (18 kb); CTRB1 (29 kb); BCAR1 (39 kb)	-0.672876	-0.267125	0.288	0.393183	NA	BCAR1 | CFDP1 | CHST6 | CTRB1 | CTRB2 | TMEM170A | ZFP1 | ZNRF1	TCFL5	ACP vs. Non-alcoholic controls	1.30753	1.18-1.4	5.1756	1.43308	1.23-1.7	5.34016	1.19318	1.03-1.4	1.64037
rs669964	10	120810623	C	A	0.3758	0	0.981	rs10787903	0.869992	FALSE	EIF3A (0 kb, intron/Intron/MODIFIER); SNORA19 (8.9 kb); NANOS1 (17 kb); FAM45A (53 kb)			2.502	0.281013	NA	BAG3 | C10orf84 | EIF3A | FAM45A | FAM45B | GRK5 | INPP5F | NANOS1 | PRDX3 | RP11-435O11.2 | SFXN4 | SNORA19 | unnamed	ZMIZ1	ACP vs. all controls	1.21832	1.12-1.3	5.1732	1.23365	1.11-1.4	3.43098	1.22986	1.1-1.4	3.47642
rs4751694	10	120855457	G	A	0.4006	0	0.983	rs10787903	0.883597	FALSE	FAM45A (8.1 kb); EIF3A (15 kb); SNORA19 (36 kb); SFXN4 (45 kb)			10.33	0.903932	NA	BAG3 | C10orf84 | EIF3A | FAM45A | FAM45B | GRK5 | INPP5F | NANOS1 | PRDX3 | RP11-435O11.2 | SFXN4 | SNORA19 | unnamed	ZMIZ1	ACP vs. all controls	1.2159	1.12-1.32	5.16928	1.2117	1.09-1.35	2.99156	1.2491	1.12-1.39	4.00197
rs189532936	7	135541323	A	G	0.0105	0	0.816	rs150350251	0.998278	FALSE	MTPN (70 kb); LUZP6 (71 kb); FAM180A (110 kb); SLC13A4 (130 kb)	0.383836	1.52354	6.014	0.72121	NA		CD4	ACP vs. all controls	2.5025	1.72-3.7	5.16872	2.19877	1.28-3.7	2.19087	1.93125	1.16-3.2	1.8238
rs55971108	11	134916016	A	C	0.1345	0	0.911	rs55971108	1	TRUE				1.906	0.709048	NA	AP005135.2 | RP11-555G19.1	PHYHD1	ACP vs. Non-alcoholic controls	1.32926	1.18-1.5	5.16849	1.52486	1.3-1.8	5.87575	1.20861	1.03-1.4	1.65451
rs671736	10	120811073	C	T	0.3758	0	0.981	rs10787903	0.870055	FALSE	EIF3A (0 kb, intron/Intron/MODIFIER); SNORA19 (8.4 kb); NANOS1 (17 kb); FAM45A (53 kb)			1.492	0.380884	NA	BAG3 | C10orf84 | EIF3A | FAM45A | FAM45B | GRK5 | INPP5F | NANOS1 | PRDX3 | RP11-435O11.2 | RP11-498J9.2 | SFXN4 | SNORA19 | unnamed	ZMIZ1	ACP vs. all controls	1.21818	1.12-1.3	5.16752	1.2335	1.11-1.4	3.42752	1.22971	1.1-1.4	3.47287
rs6564223	16	75225899	C	T	0.1793	0	0.949	rs6564219	0.897378	FALSE	RP11-331F4.1 (0.46 kb, near_gene/Downstream gene/MODIFIER); CTRB2 (12 kb); ZFP1 (20 kb); CTRB1 (27 kb); BCAR1 (37 kb)	-0.418062	-0.227354	1.397	0.700274	NA	BCAR1 | CFDP1 | CHST6 | CTRB1 | CTRB2 | TMEM170A | ZFP1 | ZNRF1	TCFL5	ACP vs. all controls	1.30276	1.16-1.4	5.16466	1.40528	1.22-1.6	4.95204	1.19374	1.03-1.4	1.67924
rs10226608	7	142345182	C	T	0.0915	0	0.933	rs62470035	0.921008	FALSE	TRBV21-1 (0.3 kb, near_gene/Downstream gene/MODIFIER); TRBV22-1 (4.1 kb, near_gene/Upstream gene/MODIFIER); TRBV23-1 (8.3 kb); TRBV20-1 (10 kb); TRBV19 (18 kb); TRBV24-1 (19 kb); TRBV25-1 (33 kb); TRBVA (44 kb)	-0.487854	-0.242371	0.836	0.174806	NA	AC093673.5 | CASP2 | ENST00000390388 | ENST00000390397 | EPHB6 | GSTK1 | KEL | PGBD4P1 | RP5-894A10.2 | TRBV19 | TRBV21-1 | TRBV24-1 | TRBV28 | U66060.1-19 | U66060.1-23 | U66061.1-11 | unnamed | ZYX		ACP vs. all controls	1.4508	1.24-1.69	5.16288	1.462	1.2-1.78	3.46089	1.3998	1.15-1.7	2.9026
rs936538	11	134864594	T	A	0.1359	0	0.941	rs55971108	0.955637	FALSE				0.149	0.251305	NA	AP005135.2 | RP11-555G19.1	PHYHD1	ACP vs. Non-alcoholic controls	1.32135	1.18-1.5	5.16049	1.48943	1.27-1.8	5.45482	1.20758	1.03-1.4	1.69641
rs2880012	23	106111775	C	T	0.0495	0	0.542	rs73249839	0.942736	FALSE	TBC1D8B (0 kb, intron/Intron/MODIFIER | near_gene/Downstream gene/MODIFIER); MORC4 (0 kb, intron/Intron/MODIFIER)					NA			ACP vs. all controls	2.38518	1.67-3.4	5.15504	2.94012	1.64-5.3	3.26005	2.3174	1.47-3.7	3.32936
rs12918452	16	75235434	G	A	0.1794	0	0.933	rs9928842	0.882228	FALSE	CTRB2 (2.6 kb, near_gene/Downstream gene/MODIFIER); CTRB1 (17 kb); BCAR1 (27 kb); ZFP1 (29 kb)	-0.0184572	0.694942	2.938	0.622916	NA	BCAR1 | CFDP1 | CHST6 | CTRB1 | CTRB2 | RFWD3 | RP11-252K23.2 | TMEM170A | ZFP1 | ZNRF1	APLP2 | FABP5 | TCFL5	ACP vs. all controls	1.30361	1.16-1.4	5.15423	1.4043	1.22-1.6	4.93394	1.22085	1.05-1.4	2.02416
rs3114480	7	142499729	C	T	0.4684	0	0.949	rs762691	0.915125	FALSE	TRBC2 (0 kb); TRBJ2-7 (4.5 kb); TRBJ2-6 (4.8 kb); TRBJ2-5 (4.9 kb); TRBJ2-4 (5 kb); TRBJ2-3 (5.1 kb); TRBJ2-2P (5.3 kb); TRBJ2-2 (5.4 kb); TRBJ2-1 (5.6 kb); TRBV30 (11 kb); WBP1LP1 (12 kb); PRSS3P2 (17 kb); PRSS3P1 (28 kb); PRSS1 (39 kb)	-0.248677	-0.185743	8.72	0.300141	NA	C7orf34 | C7ORF34 | ENST00000390392 | ENST00000390401 | ENST00000390418 | ENST00000390419 | EPHB6 | KEL | PRSS3P1 | TRBV30 | TRPV6 | U66060.1-19 | U66060.1-23 | U66061.1-11 | unnamed		ACP vs. alcoholic controls	1.21492	1.12-1.3	5.15372	1.16863	1.05-1.3	2.15268	1.29232	1.16-1.4	5.22531
rs6735118	2	8992380	G	C	0.0348	0	0.989	rs6735118	1	TRUE	MBOAT2 (0.44 kb, near_gene/Downstream gene/MODIFIER); KIDINS220 (15 kb); HMGB1P25 (170 kb); ID2 (170 kb)	0.22133	1.15165	1.674	0.641039	NA	RP11-734K21.5		ACP vs. all controls	1.61655	1.33-2	5.14519	1.45264	1.11-1.9	2.03306	1.51126	1.15-2	2.38278
rs73196539	3	126724151	G	A	0.1414	0	0.954	chr3:126728393:I	0.859156	FALSE	PLXNA1 (0 kb, intron/Intron/MODIFIER); CHCHD6 (45 kb); C3orf56 (190 kb); RCC2P4 (240 kb)	0.286608	2.92769	2.528	0.588853	NA	CHCHD6 | CHST13 | MGLL | PLXNA1		ACP vs. all controls	1.3409	1.19-1.51	5.14307	1.4442	1.23-1.69	4.72746	1.3378	1.14-1.57	3.24299
rs117619580	10	120834871	C	T	0.0391	0	0.655	rs117619580	1	TRUE	EIF3A (0 kb, intron/Intron/MODIFIER); SNORA19 (15 kb); FAM45A (29 kb); NANOS1 (41 kb)			0.287	0.50987	NA			ACP vs. all controls	1.75316	1.39-2.2	5.14198	1.78285	1.3-2.4	3.15401	2.11506	1.52-2.9	4.70496
rs113751549	1	16080818	G	T	0.0805	0	0.936	rs74054849	0.948187	FALSE	FBLIM1 (2.3 kb, near_gene/Upstream gene/MODIFIER); RP11-169K16.4 (4.4 kb, near_gene/Upstream gene/MODIFIER); TMEM82 (6.3 kb); SLC25A34 (13 kb); PLEKHM2 (20 kb)	-0.243359	-0.203352	1.008	0.665726	NA	AGMAT | CASP9 | CROCCP3 | CTRC | DDI2 | DNAJC16 | PLEKHM2 | RP11-169K16.4 | RP11-288I21.1 | RSC1A1 | SLC25A34 | unnamed	CD97	ACP vs. all controls	1.39801	1.22-1.6	5.13964	1.35906	1.12-1.6	2.55211	1.38773	1.15-1.7	3.01214
rs571974	23	105113632	C	T	0.0971	0	0.657	rs73247912	0.909165	FALSE	NRK (0 kb, intron/Intron/MODIFIER)					NA		PDGFD	ACP vs. Non-alcoholic controls	1.84253	1.43-2.37	5.13915	2.67355	1.78-4.01	5.19981	1.51487	1.12-2.05	1.99513
rs10891543	11	113255895	A	G	0.3419	0	0.997	rs4601821	0.992239	FALSE	TTC12 (1.6 kb, near_gene/Downstream gene/MODIFIER); ANKK1 (2.6 kb, near_gene/Upstream gene/MODIFIER); DRD2 (24 kb); MIR4301 (65 kb)			5.514	0.766265	0.268 Information processing speed // 0.237 Select biomarker traits	ANKK1 | C11orf71 | DRD2 | RP11-159N11.4 | TMPRSS5 | TTC12		ACP vs. all controls	1.2197	1.12-1.32	5.13731	1.2077	1.08-1.35	2.86134	1.1675	1.05-1.3	2.12727
rs41268339	1	16112326	A	G	0.1746	0	0.956	rs10803398	0.947046	FALSE	FBLIM1 (0 kb, 3'utr/3 prime UTR/MODIFIER | near_gene/Downstream gene/MODIFIER); TMEM82 (38 kb); SLC25A34 (44 kb); PLEKHM2 (51 kb)	0.0584848	-0.165366	6.201	0.611496	NA	AGMAT | CLCNKA | DNAJC16 | FBLIM1 | PLEKHM2 | RP11-169K16.4 | SLC25A34 | SPEN | TMEM82		ACP vs. all controls	1.28025	1.16-1.4	5.13671	1.16225	1.01-1.3	1.38212	1.36426	1.19-1.6	4.52519
chr9:14197367:D	9	14197367	CACTGT	C	0.1292	0	0.982	chr9:14197788:I	0.970995	FALSE	NFIB (0 kb); RPL3P11 (160 kb); PES1P2 (210 kb)			14.44		0.925 Metastasis at diagnosis in osteosarcoma	NFIB	C13ORF15 | CTSC	ACP vs. all controls	1.3164	1.18-1.47	5.13066	1.1583	0.99-1.35	1.1298	1.3897	1.18-1.63	4.00846
rs72881517	1	15740001	A	G	0.0488	0	0.781	rs79280654	0.981239	FALSE	EFHD2 (0 kb, intron/Intron/MODIFIER); RP3-467K16.4 (4.1 kb, near_gene/Upstream gene/MODIFIER); FHAD1 (13 kb); CTRC (25 kb); CELA2A (43 kb)	0.233666	1.15173	1.221	0.655005	NA	CTRC | RP11-276H7.3 | RP3-467K16.4 | TMEM51		ACP vs. all controls	1.59084	1.32-1.9	5.12909	1.53941	1.18-2	2.61283	1.63747	1.25-2.2	3.12102
rs112460630	23	106417302	T	C	0.0963	0	0.662	rs112460630	1	TRUE	NUP62CL (0 kb, intron/NMD transcript/MODIFIER | intron/Intron/MODIFIER)					NA			ACP vs. alcoholic controls	1.94351	1.48-2.56	5.12789	1.94184	1.32-2.85	2.89542	2.21772	1.6-3.08	5.36406
rs60526738	11	134912652	T	G	0.1333	0	0.914	rs55971108	0.998212	FALSE				0.493	0.340336	NA	AP005135.2 | RP11-555G19.1	PHYHD1	ACP vs. Non-alcoholic controls	1.3282	1.18-1.5	5.12748	1.523	1.3-1.8	5.81999	1.20337	1.03-1.4	1.59203
rs12274506	11	134912668	G	A	0.1333	0	0.914	rs55971108	0.998212	FALSE				3.472	0.475623	NA	AP005135.2 | RP11-555G19.1	PHYHD1	ACP vs. Non-alcoholic controls	1.3282	1.18-1.5	5.12748	1.523	1.3-1.8	5.81999	1.20337	1.03-1.4	1.59203
rs494526	10	120784994	T	G	0.376	0	0.982	rs494526	1	TRUE	NANOS1 (4.2 kb, near_gene/Upstream gene/MODIFIER); EIF3A (9.4 kb); SNORA19 (35 kb); FAM45A (79 kb)			3.68	0.636569	NA	BAG3 | C10orf84 | EIF3A | FAM45A | FAM45B | GRK5 | INPP5F | NANOS1 | PRDX3 | RP11-435O11.2 | SFXN4 | SNORA19 | unnamed	ZMIZ1	ACP vs. all controls	1.21595	1.12-1.3	5.12678	1.23365	1.11-1.4	3.45215	1.23259	1.11-1.4	3.55172
rs78821416	3	126746335	G	A	0.125	0	0.915	rs76288851	0.990941	FALSE	PLXNA1 (0 kb, nc-exon/Non coding transcript exon/MODIFIER | intron/Intron/MODIFIER | nc-RNA/Non coding transcript/MODIFIER | near_gene/Upstream gene/MODIFIER); CHCHD6 (67 kb); C3orf56 (170 kb)	0.0241789	0.822243	3.229	0.506692	NA	CHCHD6 | CHST13 | MGLL | PLXNA1		ACP vs. all controls	1.3736	1.2-1.57	5.12502	1.4473	1.22-1.72	4.12369	1.3447	1.13-1.6	2.90393
rs7797795	7	142100784	C	G	0.1699	0	0.979	rs762688	0.95993	FALSE	TRBV7-8 (0.81 kb, near_gene/Upstream gene/MODIFIER); TRBV6-9 (3.3 kb, near_gene/Downstream gene/MODIFIER); TRBV5-7 (11 kb); TRBV7-7 (19 kb); TRBV6-8 (23 kb); TRBV5-6 (31 kb); TRBV7-6 (38 kb); TRBV6-7 (43 kb); TRBV5-5 (48 kb)	-0.457218	-0.234726	0.353	0.358726	0.675 Capecitabine sensitivity	ENST00000390388 | TRBV7-4 | U66060.1-19 | unnamed	ADAD2 | CACNA1F | OR2H1 | PALLD	ACP vs. all controls	1.27861	1.15-1.4	5.1245	1.25913	1.1-1.4	2.74229	1.28254	1.12-1.5	3.21271
rs60133506	11	134912581	G	C	0.1333	0	0.914	rs55971108	0.998213	FALSE				0.687	0.154428	NA	AP005135.2 | RP11-555G19.1	PHYHD1	ACP vs. Non-alcoholic controls	1.32802	1.18-1.5	5.12322	1.52277	1.3-1.8	5.81621	1.20337	1.03-1.4	1.59203
rs12355539	10	120881211	C	T	0.416	0	0.968	rs2420495	0.981816	FALSE	FAM45A (0 kb, intron/Intron/MODIFIER | nc-RNA/Non coding transcript/MODIFIER); SFXN4 (19 kb); EIF3A (41 kb); PRDX3 (46 kb)			1.525	0.239334	NA	BAG3 | C10orf84 | EIF3A | FAM45A | FAM45B | INPP5F | NANOS1 | PRDX3 | RP11-435O11.2 | SFXN4 | SNORA19 | unnamed		ACP vs. all controls	1.2158	1.12-1.32	5.1209	1.2172	1.09-1.36	3.10269	1.2213	1.1-1.36	3.33925
rs494469	10	120784977	G	A	0.4054	2	1	rs10787903	0.809892	FALSE	NANOS1 (4.3 kb, near_gene/Upstream gene/MODIFIER); EIF3A (9.4 kb); SNORA19 (35 kb); FAM45A (79 kb)			5.327	0.573552	NA	BAG3 | C10orf84 | EIF3A | FAM45A | FAM45B | GRK5 | INPP5F | NANOS1 | PRDX3 | RP11-435O11.2 | SFXN4 | SNORA19 | unnamed	ZMIZ1	ACP vs. all controls	1.21168	1.12-1.3	5.11739	1.21907	1.1-1.4	3.21262	1.23305	1.11-1.4	3.65303
rs10252680	7	142098460	T	G	0.1658	0	0.962	rs762688	0.943669	FALSE	TRBV7-8 (0.99 kb); TRBV6-9 (5.7 kb); TRBV5-7 (13 kb); TRBV7-7 (21 kb); TRBV6-8 (26 kb); TRBV5-6 (33 kb); TRBV7-6 (41 kb); TRBV6-7 (45 kb)	-0.284454	-0.214772	2.482	0.318092	0.64 Capecitabine sensitivity	ENST00000390388 | U66060.1-19 | unnamed	ADAD2 | CACNA1F | OR2H1 | PALLD	ACP vs. all controls	1.2832	1.16-1.4	5.11686	1.26358	1.1-1.4	2.73409	1.27861	1.11-1.5	3.07041
rs73439730	15	70149558	T	C	0.0459	0	0.895	rs73439730	1	TRUE	LINC00593 (14 kb); TLE3 (190 kb); MIR629 (220 kb)	-0.0178492	-0.178012	4.332	0.769656	NA			ACP vs. all controls	1.56814	1.3-1.9	5.11682	1.56201	1.2-2	2.75197	1.7452	1.33-2.3	3.92729
rs2382456	9	14197958	T	C	0.1286	0	0.984	chr9:14197788:I	0.98108	FALSE	NFIB (0 kb, intron/Intron/MODIFIER); RPL3P11 (160 kb); PES1P2 (210 kb)	0.24656	-0.112272	10.64	0.682624	0.914 Metastasis at diagnosis in osteosarcoma	NFIB	C13ORF15 | CTSC	ACP vs. all controls	1.3167	1.17-1.48	5.10682	1.1581	0.99-1.35	1.12349	1.3726	1.17-1.61	3.74232
chr10:120811001:I	10	120811001	CA	C	0.3743	0	0.978	rs10787903	0.867577	FALSE	EIF3A (0 kb, intron/Intron/MODIFIER); SNORA19 (8.5 kb); NANOS1 (17 kb); FAM45A (53 kb)			6.388		NA	BAG3 | C10orf84 | EIF3A | FAM45A | FAM45B | GRK5 | INPP5F | NANOS1 | PRDX3 | RP11-435O11.2 | SFXN4 | SNORA19 | unnamed	ZMIZ1	ACP vs. all controls	1.21699	1.12-1.3	5.10033	1.23365	1.11-1.4	3.41002	1.22579	1.1-1.4	3.36061
rs80076962	1	48547848	T	A	0.0287	0	0.786	rs80076962	1	TRUE	RP11-193P11.3 (0 kb, nc-exon/Non coding transcript exon/MODIFIER | nc-RNA/Non coding transcript/MODIFIER); CYP46A4P (7.2 kb); SKINTL (20 kb); TRABD2B (85 kb)	0.253714	-0.0568617	6.442	0.833409	NA			ACP vs. all controls	1.81587	1.41-2.3	5.09811	1.55255	1.11-2.2	1.79378	2.05044	1.41-3	3.43692
rs4456003	23	105828303	C	T	0.0684	0	0.518	rs4456003	1	TRUE						NA			ACP vs. all controls	2.17209	1.57-3	5.09604	2.98391	1.77-5.04	3.98213	2.14008	1.43-3.21	3.40427
rs11710240	3	126713999	G	A	0.1417	0	0.957	chr3:126728393:I	0.85576	FALSE	PLXNA1 (0 kb, intron/Intron/MODIFIER); CHCHD6 (35 kb); C3orf56 (200 kb); RCC2P4 (230 kb)	1.18275	0.979715	10.73	0.718	NA	CHCHD6 | CHST13 | MGLL | PLXNA1		ACP vs. all controls	1.3374	1.19-1.51	5.0912	1.4394	1.23-1.69	4.67238	1.3369	1.14-1.57	3.24381
rs10886380	10	120850631	G	A	0.3732	0	0.989	rs10787903	0.816319	FALSE	EIF3A (10 kb); FAM45A (13 kb); SNORA19 (31 kb); SFXN4 (50 kb)			2.904	0.573307	NA	BAG3 | C10orf84 | EIF3A | FAM45A | FAM45B | GRK5 | INPP5F | NANOS1 | PRDX3 | RP11-435O11.2 | SFXN4 | SNORA19 | unnamed	ZMIZ1	ACP vs. all controls	1.2161	1.12-1.3	5.08846	1.21139	1.09-1.4	2.94866	1.24533	1.11-1.4	3.84695
rs6474824	9	14197181	C	T	0.1291	0	0.983	chr9:14197788:I	0.970678	FALSE	NFIB (0 kb, intron/Intron/MODIFIER); RPL3P11 (160 kb); PES1P2 (210 kb)	0.176118	-0.112589	5.548	0.707743	0.925 Metastasis at diagnosis in osteosarcoma	NFIB	C13ORF15 | CTSC	ACP vs. all controls	1.3153	1.17-1.47	5.08733	1.1567	0.99-1.35	1.11391	1.3898	1.19-1.63	4.00998
rs10961413	9	14195333	C	T	0.1293	0	0.962	chr9:14197788:I	0.918099	FALSE	NFIB (0 kb, intron/Intron/MODIFIER); RPL3P11 (150 kb); PES1P2 (210 kb); LINC00583 (250 kb)	0.319563	-0.0293104	11.66	0.86982	0.936 Metastasis at diagnosis in osteosarcoma	CER1 | NFIB	C13ORF15 | CTSC	ACP vs. all controls	1.31822	1.18-1.5	5.08253	1.16104	0.99-1.4	1.13521	1.39684	1.19-1.6	4.05684
rs2382454	9	14196340	T	C	0.1256	2	1	chr9:14197788:I	0.926362	FALSE	NFIB (0 kb, intron/Intron/MODIFIER); RPL3P11 (150 kb); PES1P2 (210 kb)	0.0413554	-0.156448	2.892	0.494695	0.914 Metastasis at diagnosis in osteosarcoma	NFIB	C13ORF15 | CTSC	ACP vs. all controls	1.3151	1.18-1.5	5.08225	1.16306	1-1.4	1.17529	1.38793	1.19-1.6	3.9985
rs10074415	5	73548364	G	A	0.3316	0	0.975	rs10074415	1	TRUE		-0.783346	-0.267567	0.066	0.432219	NA	AK021959 | ANKRA2 | ARHGEF28 | BTF3 | UTP15		ACP vs. all controls	1.2292	1.13-1.34	5.08164	1.207	1.08-1.35	2.69122	1.2966	1.16-1.45	4.86031
rs1107702	10	120893122	G	T	0.4124	0	0.979	rs2420495	0.989632	FALSE	FAM45A (0 kb, nc-exon/Non coding transcript exon/MODIFIER | intron/Intron/MODIFIER | nc-RNA/Non coding transcript/MODIFIER | near_gene/Downstream gene/MODIFIER | near_gene/Upstream gene/MODIFIER); SFXN4 (7.2 kb); PRDX3 (34 kb); EIF3A (53 kb)			2.976	0.457775	NA	BAG3 | C10orf84 | EIF3A | FAM45A | FAM45B | GRK5 | INPP5F | NANOS1 | PRDX3 | RP11-435O11.2 | SFXN4 | SNORA19 | unnamed	ZMIZ1	ACP vs. all controls	1.2142	1.12-1.32	5.08163	1.2137	1.09-1.35	3.03521	1.2133	1.09-1.35	3.17374
rs8057843	16	75221555	G	T	0.1788	0	0.938	rs6564219	0.897285	FALSE	RP11-331F4.1 (4.8 kb, near_gene/Downstream gene/MODIFIER); ZFP1 (15 kb); CTRB2 (16 kb); CTRB1 (31 kb); BCAR1 (41 kb)	-0.596375	-0.245732	2.503	0.571262	NA	BCAR1 | CFDP1 | CHST6 | CTRB1 | CTRB2 | TMEM170A | ZFP1 | ZNRF1	TCFL5	ACP vs. all controls	1.30208	1.16-1.4	5.0813	1.40726	1.22-1.6	4.92871	1.19632	1.03-1.4	1.69345
rs6681468	1	16079818	G	T	0.0817	0	0.935	rs74054849	0.951391	FALSE	FBLIM1 (3.3 kb, near_gene/Upstream gene/MODIFIER); RP11-169K16.4 (3.4 kb, near_gene/Upstream gene/MODIFIER); TMEM82 (5.3 kb); SLC25A34 (12 kb); PLEKHM2 (19 kb)	-0.579176	-0.24914	2.463	0.457967	NA	AGMAT | CASP9 | CROCCP3 | CTRC | DDI2 | DNAJC16 | PLEKHM2 | RP11-169K16.4 | RP11-288I21.1 | RP4-798A10.2 | RSC1A1 | SLC25A34 | unnamed	CD97	ACP vs. all controls	1.39295	1.22-1.6	5.07949	1.34264	1.11-1.6	2.4153	1.37912	1.15-1.7	2.93673
rs10886396	10	120890902	A	G	0.4087	0	0.962	rs2420495	0.9304	FALSE	FAM45A (0 kb, intron/Intron/MODIFIER | nc-RNA/Non coding transcript/MODIFIER | near_gene/Downstream gene/MODIFIER); SFXN4 (9.4 kb); PRDX3 (36 kb); EIF3A (51 kb)			0.298	0.0778453	NA	BAG3 | C10orf84 | EIF3A | FAM45A | FAM45B | INPP5F | NANOS1 | PRDX3 | RP11-435O11.2 | SFXN4 | SNORA19 | unnamed		ACP vs. all controls	1.2164	1.12-1.32	5.078	1.2144	1.09-1.36	2.99537	1.2327	1.11-1.37	3.55434
rs11198793	10	120890584	C	A	0.4124	0	0.979	rs2420495	0.989159	FALSE	FAM45A (0 kb, intron/Intron/MODIFIER | nc-RNA/Non coding transcript/MODIFIER | near_gene/Downstream gene/MODIFIER); SFXN4 (9.7 kb); PRDX3 (37 kb); EIF3A (50 kb)			6.626	0.67664	NA	BAG3 | C10orf84 | EIF3A | FAM45A | FAM45B | GRK5 | INPP5F | NANOS1 | PRDX3 | RP11-435O11.2 | SFXN4 | SNORA19 | unnamed		ACP vs. all controls	1.2141	1.12-1.32	5.0778	1.214	1.09-1.35	3.04178	1.214	1.09-1.35	3.18988
rs12355525	10	120881107	C	T	0.4124	0	0.976	rs2420495	0.987466	FALSE	FAM45A (0 kb, intron/Intron/MODIFIER | nc-RNA/Non coding transcript/MODIFIER); SFXN4 (19 kb); EIF3A (41 kb); PRDX3 (46 kb)			2.068	0.599916	NA	BAG3 | C10orf84 | EIF3A | FAM45A | FAM45B | GRK5 | INPP5F | NANOS1 | PRDX3 | RP11-435O11.2 | SFXN4 | SNORA19 | unnamed		ACP vs. all controls	1.214	1.12-1.32	5.07397	1.2126	1.09-1.35	3.01117	1.2153	1.09-1.35	3.20994
rs6759797	2	8992153	A	G	0.0369	2	1	rs6735118	0.936346	FALSE	MBOAT2 (0.67 kb, near_gene/Downstream gene/MODIFIER); KIDINS220 (14 kb); HMGB1P25 (170 kb); ID2 (170 kb)	-0.513424	-0.0557591	0.501	0.689108	NA			ACP vs. all controls	1.5916	1.32-1.9	5.07374	1.42308	1.1-1.9	1.93273	1.45117	1.11-1.9	2.11771
rs11198741	10	120788730	A	G	0.38	0	0.977	rs10787903	0.823267	FALSE	NANOS1 (0.5 kb, near_gene/Upstream gene/MODIFIER); EIF3A (5.6 kb); SNORA19 (31 kb); FAM45A (75 kb)			5.024	0.684485	NA	BAG3 | C10orf84 | EIF3A | FAM45A | FAM45B | GRK5 | INPP5F | NANOS1 | PRDX3 | RP11-435O11.2 | SFXN4 | SNORA19 | unnamed	ZMIZ1	ACP vs. all controls	1.21566	1.12-1.3	5.07162	1.23564	1.11-1.4	3.46548	1.22026	1.1-1.4	3.26389
rs74227960	1	48554479	G	A	0.0279	0	0.724	rs80076962	0.925076	FALSE	CYP46A4P (0.56 kb, near_gene/Upstream gene/MODIFIER); SKINTL (13 kb); TRABD2B (92 kb); SLC5A9 (130 kb)	-0.408949	-0.231818	1.068	0.48607	NA			ACP vs. all controls	1.87793	1.45-2.4	5.07128	1.57011	1.1-2.2	1.72113	2.05044	1.37-3	3.16442
rs6974518	7	142328771	T	C	0.101	2	1	rs17211	0.897557	FALSE	TRBV19 (1.7 kb, near_gene/Downstream gene/MODIFIER); TRBV20-1 (5.4 kb); TRBV21-1 (16 kb); TRBV22-1 (20 kb); TRBV23-1 (25 kb); TRBV24-1 (35 kb); TRBV25-1 (50 kb)	-0.213934	-0.202475	1.54	0.569742	NA	ENST00000390388 | ENST00000390397 | EPHB6 | KEL | PGBD4P1 | PRSS1 | RP5-894A10.2 | TRBV19 | TRBV21-1 | TRBV24-1 | TRBV25-1 | TRBV27 | TRBV28 | U66060.1-19 | U66060.1-23 | U66061.1-11 | unnamed		ACP vs. all controls	1.40154	1.22-1.6	5.06717	1.39723	1.16-1.7	3.19127	1.32714	1.11-1.6	2.4812
rs3824831	10	120892585	C	T	0.4123	0	0.979	rs2420495	0.989591	FALSE	FAM45A (0 kb, nc-exon/Non coding transcript exon/MODIFIER | intron/Intron/MODIFIER | nc-RNA/Non coding transcript/MODIFIER | near_gene/Downstream gene/MODIFIER | near_gene/Upstream gene/MODIFIER); SFXN4 (7.7 kb); PRDX3 (35 kb); EIF3A (52 kb)			2.681	0.64853	NA	BAG3 | C10orf84 | EIF3A | FAM45A | FAM45B | GRK5 | INPP5F | NANOS1 | PRDX3 | RP11-435O11.2 | SFXN4 | SNORA19 | unnamed		ACP vs. all controls	1.2138	1.12-1.32	5.06631	1.213	1.09-1.35	3.01991	1.2127	1.09-1.35	3.15993
rs67907256	3	126739919	A	G	0.1412	0	0.938	chr3:126728393:I	0.85097	FALSE	PLXNA1 (0 kb, intron/Intron/MODIFIER); CHCHD6 (61 kb); C3orf56 (170 kb)	-0.111048	1.24983	3.697	0.430447	NA	CHCHD6 | CHST13 | MGLL | PLXNA1		ACP vs. all controls	1.3407	1.19-1.51	5.06524	1.4452	1.23-1.7	4.63215	1.349	1.15-1.58	3.3469
rs960438	16	16899495	G	A	0.3892	0	0.708	rs960438	1	TRUE		-0.220565	-0.198612	2.956	0.767109	NA	ABCC1 | NOMO3 | XYLT1	SLC25A19	ACP vs. all controls	1.25329	1.14-1.4	5.06468	1.23671	1.09-1.4	2.75957	1.17592	1.04-1.3	1.84744
rs4722748	7	28003516	C	T	0.3588	0	0.974	rs4722748	1	TRUE	JAZF1 (0 kb, intron/NMD transcript/MODIFIER | intron/Intron/MODIFIER); TAX1BP1 (120 kb); JAZF1-AS1 (220 kb)	-0.396928	-0.231429	0.801	0.733533	0.252 Prostate cancer	CREB5 | HIBADH | JAZF1 | TAX1BP1 | unnamed		ACP vs. all controls	1.21832	1.12-1.3	5.06396	1.25518	1.12-1.4	3.83778	1.178	1.05-1.3	2.31183
rs55983130	3	126710956	G	A	0.142	0	0.957	chr3:126728393:I	0.853693	FALSE	PLXNA1 (0 kb, intron/Intron/MODIFIER); CHCHD6 (32 kb); C3orf56 (200 kb); RCC2P4 (220 kb)	-0.245933	0.302454	1.132	0.314102	NA	CHCHD6 | CHST13 | MGLL | PLXNA1		ACP vs. all controls	1.3355	1.18-1.51	5.06166	1.4394	1.23-1.69	4.68255	1.3389	1.14-1.57	3.28621
rs56037455	3	126710965	G	A	0.142	0	0.957	chr3:126728393:I	0.853695	FALSE	PLXNA1 (0 kb, intron/Intron/MODIFIER); CHCHD6 (32 kb); C3orf56 (200 kb); RCC2P4 (220 kb)	0.0576551	0.35115	3.567	0.658276	NA	CHCHD6 | CHST13 | MGLL | PLXNA1		ACP vs. all controls	1.3355	1.18-1.51	5.06166	1.4394	1.23-1.69	4.68255	1.3389	1.14-1.57	3.28621
rs12355491	10	120880877	C	T	0.4126	0	0.976	rs2420495	0.987856	FALSE	FAM45A (0 kb, intron/Intron/MODIFIER | nc-RNA/Non coding transcript/MODIFIER); SFXN4 (19 kb); EIF3A (40 kb); PRDX3 (46 kb)			0.226	0.502253	NA	BAG3 | C10orf84 | EIF3A | FAM45A | FAM45B | GRK5 | INPP5F | NANOS1 | PRDX3 | RP11-435O11.2 | SFXN4 | SNORA19 | unnamed		ACP vs. all controls	1.2133	1.12-1.32	5.0472	1.2111	1.09-1.35	2.97851	1.2156	1.09-1.35	3.21687
rs10148610	14	33727126	C	T	0.3953	0	0.994	rs10148610	1	TRUE	NPAS3 (0 kb, intron/Intron/MODIFIER | nc-RNA/Non coding transcript/MODIFIER)	0.554399	-0.0850297	5.968	0.429291	NA	AKAP6	PPARA | TPM2	ACP vs. all controls	1.2167	1.12-1.32	5.04609	1.1934	1.07-1.33	2.55771	1.2109	1.09-1.35	3.08979
rs6474825	9	14197275	T	C	0.1299	0	0.981	chr9:14197788:I	0.966168	FALSE	NFIB (0 kb, intron/Intron/MODIFIER); RPL3P11 (160 kb); PES1P2 (210 kb)	0.511256	-0.0672483	7.976	0.54899	0.904 Metastasis at diagnosis in osteosarcoma	NFIB | ZDHHC21	C13ORF15 | CTSC | NSA2	ACP vs. all controls	1.313	1.17-1.47	5.04521	1.1555	0.99-1.35	1.10417	1.3845	1.18-1.62	3.93777
rs2890984	9	14198747	A	T	0.1279	0	0.99	chr9:14197788:I	0.969192	FALSE	NFIB (0 kb, intron/Intron/MODIFIER); RPL3P11 (160 kb); PES1P2 (210 kb)	0.282611	-0.051658	5.844	0.802329	0.935 Metastasis at diagnosis in osteosarcoma	NFIB	C13ORF15 | CTSC	ACP vs. all controls	1.3132	1.17-1.47	5.03477	1.1539	0.99-1.35	1.08218	1.3775	1.17-1.62	3.80744
chr16:75268120:I	16	75268120	TG	T	0.172	0	0.909	rs9928842	0.876618	FALSE	BCAR1 (0 kb, intron/NMD transcript/MODIFIER | intron/Intron/MODIFIER | nc-RNA/Non coding transcript/MODIFIER | near_gene/Downstream gene/MODIFIER); CTRB1 (9.3 kb); CTRB2 (27 kb); CFDP1 (59 kb)			0.65		NA	BCAR1 | CFDP1 | CHST6 | CTRB1 | CTRB2 | RP11-252K23.2 | TMEM170A | ZFP1 | ZNRF1	TCFL5	ACP vs. all controls	1.30993	1.18-1.5	5.02997	1.34971	1.16-1.6	3.75179	1.20207	1.03-1.4	1.7072
rs2382457	9	14198371	C	T	0.1279	0	0.989	chr9:14197788:I	0.969339	FALSE	NFIB (0 kb, intron/Intron/MODIFIER); RPL3P11 (160 kb); PES1P2 (210 kb)	-0.169958	-0.178298	2.544	0.577217	0.935 Metastasis at diagnosis in osteosarcoma	NFIB	C13ORF15 | CTSC	ACP vs. all controls	1.3136	1.17-1.47	5.02936	1.1539	0.99-1.35	1.08218	1.3784	1.17-1.62	3.82091
rs10886397	10	120890942	C	T	0.413	0	0.977	rs2420495	0.987981	FALSE	FAM45A (0 kb, intron/Intron/MODIFIER | nc-RNA/Non coding transcript/MODIFIER | near_gene/Downstream gene/MODIFIER); SFXN4 (9.3 kb); PRDX3 (36 kb); EIF3A (51 kb)			2.055	0.242416	NA	BAG3 | C10orf84 | EIF3A | FAM45A | FAM45B | GRK5 | INPP5F | NANOS1 | PRDX3 | RP11-435O11.2 | SFXN4 | SNORA19 | unnamed		ACP vs. all controls	1.2128	1.12-1.31	5.02811	1.2147	1.09-1.35	3.05713	1.2129	1.09-1.35	3.15471
rs75475662	23	106453247	A	G	0.0315	0	0.744	rs75475662	1	TRUE	PIH1D3 (0 kb, intron/Intron/MODIFIER); NUP62CL (3.6 kb, near_gene/Upstream gene/MODIFIER)					NA		FGFBP2	ACP vs. all controls	2.56657	1.72-3.8	5.02785	2.21509	1.2-4.2	1.79677	2.93107	1.72-5	3.78467
rs4532695	9	14198644	T	C	0.1279	0	0.989	chr9:14197788:I	0.96926	FALSE	NFIB (0 kb, intron/Intron/MODIFIER); RPL3P11 (160 kb); PES1P2 (210 kb)	0.302078	-0.0820656	5.235	0.565107	0.935 Metastasis at diagnosis in osteosarcoma	NFIB	C13ORF15 | CTSC	ACP vs. all controls	1.3134	1.17-1.47	5.02438	1.1539	0.99-1.35	1.08218	1.3778	1.17-1.62	3.81192
rs112467738	6	120215011	C	T	0.0256	0	0.91	rs112467738	1	TRUE	MIR3144 (120 kb)	-0.440176	-0.24038	1.077	0.380832	NA			ACP vs. all controls	2.1227	1.55-2.91	5.01945	2.0049	1.34-3	2.87642	2.2154	1.49-3.3	3.79819
rs6564239	16	75253804	A	T	0.1599	0	0.944	rs9928842	0.862956	FALSE	CTRB1 (0 kb, intron/Intron/MODIFIER | near_gene/Upstream gene/MODIFIER); BCAR1 (9.1 kb); CTRB2 (13 kb); ZFP1 (48 kb)	-0.172961	-0.0871648	4.912	0.421647	NA	ADAT1 | BCAR1 | CFDP1 | CHST6 | CTRB1 | CTRB2 | GLG1 | MLKL | RFWD3 | RP11-252K23.2 | TMEM170A | ZFP1 | ZNRF1	PDPR | TCFL5	ACP vs. all controls	1.31441	1.18-1.5	5.01874	1.40351	1.2-1.6	4.57277	1.23381	1.06-1.4	2.09413
rs73439723	15	70143253	G	A	0.0454	0	0.885	rs73439730	0.972031	FALSE	LINC00593 (7.8 kb); TLE3 (200 kb); MIR629 (230 kb)	-0.667291	-0.26221	0.141	0.462165	NA			ACP vs. all controls	1.56764	1.3-1.9	5.01621	1.56201	1.19-2	2.69823	1.73792	1.32-2.3	3.77688
rs138580325	23	106332293	G	A	0.0333	0	0.774	rs75475662	0.966066	FALSE	RBM41 (0 kb, intron/NMD transcript/MODIFIER | intron/Intron/MODIFIER | nc-RNA/Non coding transcript/MODIFIER)					NA		FGFBP2	ACP vs. all controls	2.45751	1.69-3.6	5.01621	2.02516	1.14-3.6	1.63453	3.00573	1.79-5	4.15335
chr1:15756690:D	1	15756690	G	GT	0.0133	0	0.688	chr1:15756690:D	1	TRUE	EFHD2 (0 kb); CTRC (8.2 kb); CELA2A (27 kb); FHAD1 (30 kb); CELA2B (36 kb)			2.68		NA			ACP vs. all controls	2.42718	1.67-3.6	5.00923	1.79695	1.06-3	1.44367	3.32226	1.79-6.2	3.53598
rs8050765	16	75233026	C	T	0.1736	0	0.97	chr16:75232655:D	0.813616	FALSE	CTRB2 (5 kb, near_gene/Downstream gene/MODIFIER); CTRB1 (20 kb); ZFP1 (27 kb); BCAR1 (30 kb)	-0.702888	-0.273005	0.385	0.175829	NA	BCAR1 | CFDP1 | CHST6 | CTRB1 | CTRB2 | TMEM170A | ZFP1 | ZNRF1	TCFL5	ACP vs. all controls	1.29685	1.16-1.4	5.00788	1.38408	1.2-1.6	4.61198	1.20758	1.04-1.4	1.86068
rs10810106	9	14195454	T	C	0.1306	0	0.961	chr9:14197788:I	0.908324	FALSE	NFIB (0 kb, intron/Intron/MODIFIER); RPL3P11 (150 kb); PES1P2 (210 kb); LINC00583 (250 kb)	0.144179	-0.118673	7.993	0.744401	0.904 Metastasis at diagnosis in osteosarcoma	NFIB	C13ORF15 | CTSC	ACP vs. all controls	1.31458	1.18-1.5	5.00777	1.15247	0.99-1.4	1.0602	1.3887	1.19-1.6	3.97611
rs7703327	5	105964086	C	T	0.3822	0	0.917	rs7703327	1	TRUE		-0.894893	-0.299531	0.344	0.183297	NA	unnamed		ACP vs. all controls	1.22534	1.12-1.3	5.00579	1.19689	1.06-1.3	2.50081	1.20904	1.08-1.4	2.80274
rs76004858	1	48545156	C	T	0.034	0	0.769	rs80076962	0.857388	FALSE	RP11-193P11.3 (0 kb, intron/Intron/MODIFIER | nc-RNA/Non coding transcript/MODIFIER); CYP46A4P (9.9 kb); SKINTL (22 kb); TRABD2B (83 kb)	-0.0703187	-0.183373	1.727	0.566005	NA			ACP vs. all controls	1.73671	1.37-2.2	5.00472	1.48412	1.09-2	1.70486	1.90803	1.35-2.7	3.3303
rs57715698	11	134909649	T	G	0.1341	0	0.938	rs55971108	0.991333	FALSE				2.164	0.727807	NA	AP005135.2 | RP11-555G19.1	PHYHD1	ACP vs. Non-alcoholic controls	1.31683	1.18-1.5	5.00251	1.50286	1.28-1.8	5.66422	1.19232	1.02-1.4	1.50787

## Sheet: GWAS catalogue
SNP	chromosome of SNP	position of SNP	r2 SNP & GWAS-SNP	distance SNP & GWAS-SNP	reference LD calculation	GWAS-SNP	GWAS-SNP-Haplotype	GWAS-phenotype	GWAS-p-value-details	GWAs-p-value	GWAS reported genes	GWAS first author	GWAS date	GWAS PMID
rs2303195	1	15783222	0.218526	9204	1kg_eur	rs2901964	rs2901964	Erectile dysfunction and prostate cancer treatment		5e-06	ELA2A	Kerns SL	2010-10-05	20932654
rs10919615	1	198974904	0.820614	32304	1kg_eur	rs7529925	rs7529925	Red blood cell traits	(EA, RBCC)	8e-09	MIR181A1	van der Harst P	2012-12-05	23222517
rs12239179	1	198976492	0.819606	30716	1kg_eur	rs7529925	rs7529925	Red blood cell traits	(EA, RBCC)	8e-09	MIR181A1	van der Harst P	2012-12-05	23222517
rs1124025	1	198979818	0.840522	27390	1kg_eur	rs7529925	rs7529925	Red blood cell traits	(EA, RBCC)	8e-09	MIR181A1	van der Harst P	2012-12-05	23222517
rs4988235	2	136608646	1	0	1kg_eur	rs4988235	rs4988235	Body mass index	(EA)	5e-06	MCM6	Locke AE	2015-02-12	25673413
rs4988235	2	136608646	1	0	1kg_eur	rs4988235	rs4988235	Body mass index		2e-06	MCM6	Locke AE	2015-02-12	25673413
rs4988235	2	136608646	0.905106	770740	1kg_eur	rs7570971	rs7570971	Cholesterol, total		1e-08	RAB3GAP1	Teslovich TM	2010-08-05	20686565
rs4988235	2	136608646	0.905106	770740	1kg_eur	rs7570971	rs7570971	Blood metabolite levels	(1,5-anhydroglucitol (1,5-AG))	8e-45	RAB3GAP1	Shin SY	2014-05-11	24816252
rs4988235	2	136608646	0.905106	770740	1kg_eur	rs7570971	rs7570971	Cholesterol, total		1e-13	RAB3GAP1	Willer CJ	2013-10-06	24097068
rs4988235	2	136608646	0.905106	770740	1kg_eur	rs7570971	rs7570971	Body mass index	(EA)	2e-06	RAB3GAP1	Locke AE	2015-02-12	25673413
rs4988235	2	136608646	0.905106	770740	1kg_eur	rs7570971	rs7570971	Body mass index		1e-06	RAB3GAP1	Locke AE	2015-02-12	25673413
rs4988235	2	136608646	0.676255	85705	1kg_eur	rs28453840	rs28453840	Cholesterol, total		3e-09	RAB3GAP1	Surakka I	2015-05-11	25961943
rs4988235	2	136608646	0.476617	407345	1kg_eur	rs4452212	rs4452212	Telomere length		2e-06	CXCR4	Levy D	2010-04-26	20421499
rs4988235	2	136608646	0.437825	101719	1kg_eur	rs6430585	rs6430585	Corneal structure		1e-06	UBXD2	Li X	2011-10-06	21979947
rs4988235	2	136608646	0.352592	975665	1kg_eur	rs4954192	rs4954192	Diisocyanate-induced asthma		6e-07	ACMSD, TMEM163, CCNT2	Yucesoy B	2015-04-26	25918132
rs4988235	2	136608646	0.322608	977246	1kg_eur	rs6430553	rs6430553	Blood metabolite levels	(X-12095--N1-methyl-3-pyridone-4-carboxamide)	6e-12	ACMSD	Shin SY	2014-05-11	24816252
rs4988235	2	136608646	0.281856	367609	1kg_eur	rs882300	rs882300	Electrocardiographic traits	(PR interval)	3e-07	intergenic	Newton-Cheh C	2007-09-19	17903306
rs4988235	2	136608646	0.281856	367609	1kg_eur	rs882300	rs882300	Multiple sclerosis		1e-07	CXCR4	De Jager PL	2009-06-14	19525953
rs4988235	2	136608646	0.207731	805221	1kg_eur	rs4954218	rs4954218	Corneal structure		1e-09	RAB3GAP1	Li X	2011-10-06	21979947
rs182549	2	136616754	1	8108	1kg_eur	rs4988235	rs4988235	Body mass index	(EA)	5e-06	MCM6	Locke AE	2015-02-12	25673413
rs182549	2	136616754	1	8108	1kg_eur	rs4988235	rs4988235	Body mass index		2e-06	MCM6	Locke AE	2015-02-12	25673413
rs182549	2	136616754	0.905106	778848	1kg_eur	rs7570971	rs7570971	Cholesterol, total		1e-08	RAB3GAP1	Teslovich TM	2010-08-05	20686565
rs182549	2	136616754	0.905106	778848	1kg_eur	rs7570971	rs7570971	Blood metabolite levels	(1,5-anhydroglucitol (1,5-AG))	8e-45	RAB3GAP1	Shin SY	2014-05-11	24816252
rs182549	2	136616754	0.905106	778848	1kg_eur	rs7570971	rs7570971	Cholesterol, total		1e-13	RAB3GAP1	Willer CJ	2013-10-06	24097068
rs182549	2	136616754	0.905106	778848	1kg_eur	rs7570971	rs7570971	Body mass index	(EA)	2e-06	RAB3GAP1	Locke AE	2015-02-12	25673413
rs182549	2	136616754	0.905106	778848	1kg_eur	rs7570971	rs7570971	Body mass index		1e-06	RAB3GAP1	Locke AE	2015-02-12	25673413
rs182549	2	136616754	0.676255	93813	1kg_eur	rs28453840	rs28453840	Cholesterol, total		3e-09	RAB3GAP1	Surakka I	2015-05-11	25961943
rs182549	2	136616754	0.476617	399237	1kg_eur	rs4452212	rs4452212	Telomere length		2e-06	CXCR4	Levy D	2010-04-26	20421499
rs182549	2	136616754	0.437825	109827	1kg_eur	rs6430585	rs6430585	Corneal structure		1e-06	UBXD2	Li X	2011-10-06	21979947
rs182549	2	136616754	0.352592	983773	1kg_eur	rs4954192	rs4954192	Diisocyanate-induced asthma		6e-07	ACMSD, TMEM163, CCNT2	Yucesoy B	2015-04-26	25918132
rs182549	2	136616754	0.322608	985354	1kg_eur	rs6430553	rs6430553	Blood metabolite levels	(X-12095--N1-methyl-3-pyridone-4-carboxamide)	6e-12	ACMSD	Shin SY	2014-05-11	24816252
rs182549	2	136616754	0.281856	359501	1kg_eur	rs882300	rs882300	Electrocardiographic traits	(PR interval)	3e-07	intergenic	Newton-Cheh C	2007-09-19	17903306
rs182549	2	136616754	0.281856	359501	1kg_eur	rs882300	rs882300	Multiple sclerosis		1e-07	CXCR4	De Jager PL	2009-06-14	19525953
rs182549	2	136616754	0.207731	813329	1kg_eur	rs4954218	rs4954218	Corneal structure		1e-09	RAB3GAP1	Li X	2011-10-06	21979947
rs309811	2	136625602	0.800853	102661	1kg_eur	rs28453840	rs28453840	Cholesterol, total		3e-09	RAB3GAP1	Surakka I	2015-05-11	25961943
rs309811	2	136625602	0.706517	16956	1kg_eur	rs4988235	rs4988235	Body mass index	(EA)	5e-06	MCM6	Locke AE	2015-02-12	25673413
rs309811	2	136625602	0.706517	16956	1kg_eur	rs4988235	rs4988235	Body mass index		2e-06	MCM6	Locke AE	2015-02-12	25673413
rs309811	2	136625602	0.660819	787696	1kg_eur	rs7570971	rs7570971	Cholesterol, total		1e-08	RAB3GAP1	Teslovich TM	2010-08-05	20686565
rs309811	2	136625602	0.660819	787696	1kg_eur	rs7570971	rs7570971	Blood metabolite levels	(1,5-anhydroglucitol (1,5-AG))	8e-45	RAB3GAP1	Shin SY	2014-05-11	24816252
rs309811	2	136625602	0.660819	787696	1kg_eur	rs7570971	rs7570971	Cholesterol, total		1e-13	RAB3GAP1	Willer CJ	2013-10-06	24097068
rs309811	2	136625602	0.660819	787696	1kg_eur	rs7570971	rs7570971	Body mass index	(EA)	2e-06	RAB3GAP1	Locke AE	2015-02-12	25673413
rs309811	2	136625602	0.660819	787696	1kg_eur	rs7570971	rs7570971	Body mass index		1e-06	RAB3GAP1	Locke AE	2015-02-12	25673413
rs309811	2	136625602	0.510377	118675	1kg_eur	rs6430585	rs6430585	Corneal structure		1e-06	UBXD2	Li X	2011-10-06	21979947
rs309811	2	136625602	0.388566	390389	1kg_eur	rs4452212	rs4452212	Telomere length		2e-06	CXCR4	Levy D	2010-04-26	20421499
rs309811	2	136625602	0.212501	992621	1kg_eur	rs4954192	rs4954192	Diisocyanate-induced asthma		6e-07	ACMSD, TMEM163, CCNT2	Yucesoy B	2015-04-26	25918132
rs309811	2	136625602	0.20883	350653	1kg_eur	rs882300	rs882300	Electrocardiographic traits	(PR interval)	3e-07	intergenic	Newton-Cheh C	2007-09-19	17903306
rs309811	2	136625602	0.20883	350653	1kg_eur	rs882300	rs882300	Multiple sclerosis		1e-07	CXCR4	De Jager PL	2009-06-14	19525953
rs632632	2	136638216	0.86926	115275	1kg_eur	rs28453840	rs28453840	Cholesterol, total		3e-09	RAB3GAP1	Surakka I	2015-05-11	25961943
rs632632	2	136638216	0.787821	29570	1kg_eur	rs4988235	rs4988235	Body mass index	(EA)	5e-06	MCM6	Locke AE	2015-02-12	25673413
rs632632	2	136638216	0.787821	29570	1kg_eur	rs4988235	rs4988235	Body mass index		2e-06	MCM6	Locke AE	2015-02-12	25673413
rs632632	2	136638216	0.739333	800310	1kg_eur	rs7570971	rs7570971	Cholesterol, total		1e-08	RAB3GAP1	Teslovich TM	2010-08-05	20686565
rs632632	2	136638216	0.739333	800310	1kg_eur	rs7570971	rs7570971	Blood metabolite levels	(1,5-anhydroglucitol (1,5-AG))	8e-45	RAB3GAP1	Shin SY	2014-05-11	24816252
rs632632	2	136638216	0.739333	800310	1kg_eur	rs7570971	rs7570971	Cholesterol, total		1e-13	RAB3GAP1	Willer CJ	2013-10-06	24097068
[truncated: 463 more rows]

## Sheet: eQTLs
SNP	chromosome of SNP	position of SNP	r2 SNP & eQTL-SNP	distance SNP & GWAS-SNP	reference LD calculation	eQTL-SNP	eQTL-gene	eQTL-gene probe ID	cis/trans	eQTL tissue	eQTL p-value or q-value	eQTL statistic type	chromosome of eQTL-SNP	position of eQTL-SNP	chromosome of eQTL-gene	transcription start position eQTL-gene	transcription end position eQTL-gene	distance eQTL-SNP eQTL-gene	eQTL first author	eQTL PMID
[truncated: 17,070 more rows]
